# Supplementary material for: Accurate fusion transcript identification from long- and short-read isoform sequencing at bulk or single-cell resolution
Source: HighWire-hosted journal article supplement (doi:10.1101/gr.279200.124), 2025-03-14

Patient 2 Tumor, Fusion: IGF2BP2--TESPA1

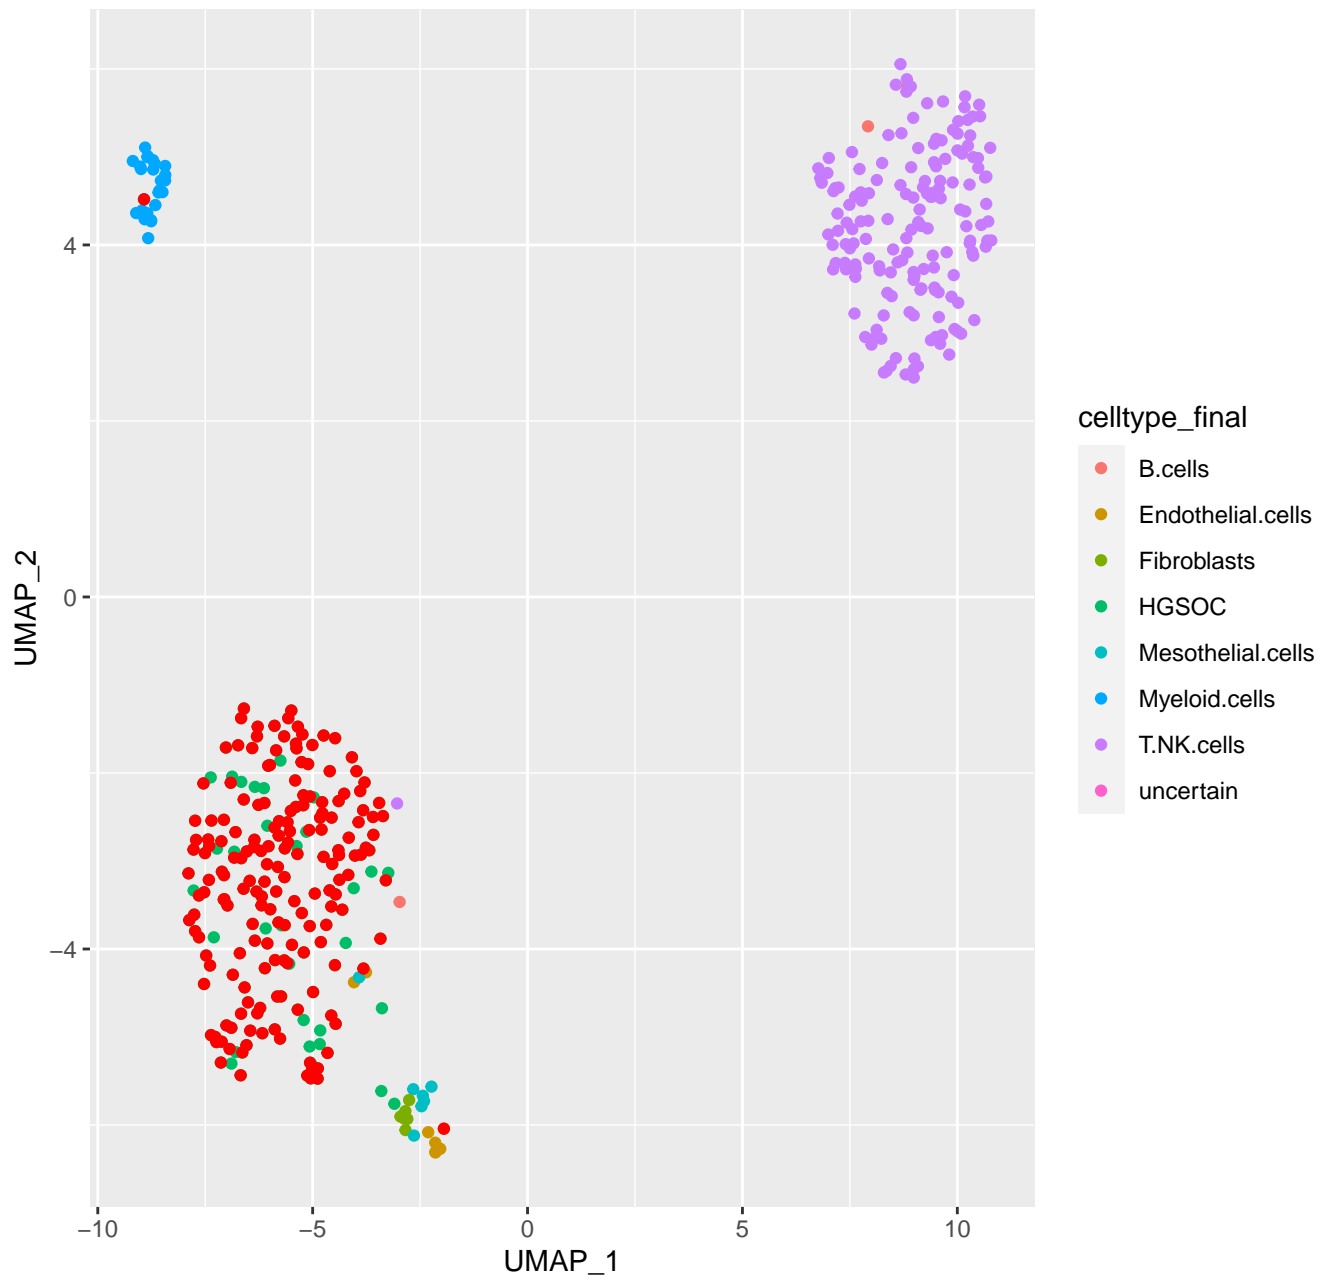

Patient 2 Tumor, Fusion: IGF2BP2--TESPA1



Patient 2 Tumor, Fusion: IGF2BP2--TESPA1



Patient 2 Tumor, Fusion: IGF2BP2--TESPA1



Patient 2 Tumor, Fusion: IGF2BP2--TESPA1



Patient 2 Tumor, Fusion: PSMB7--SCAI

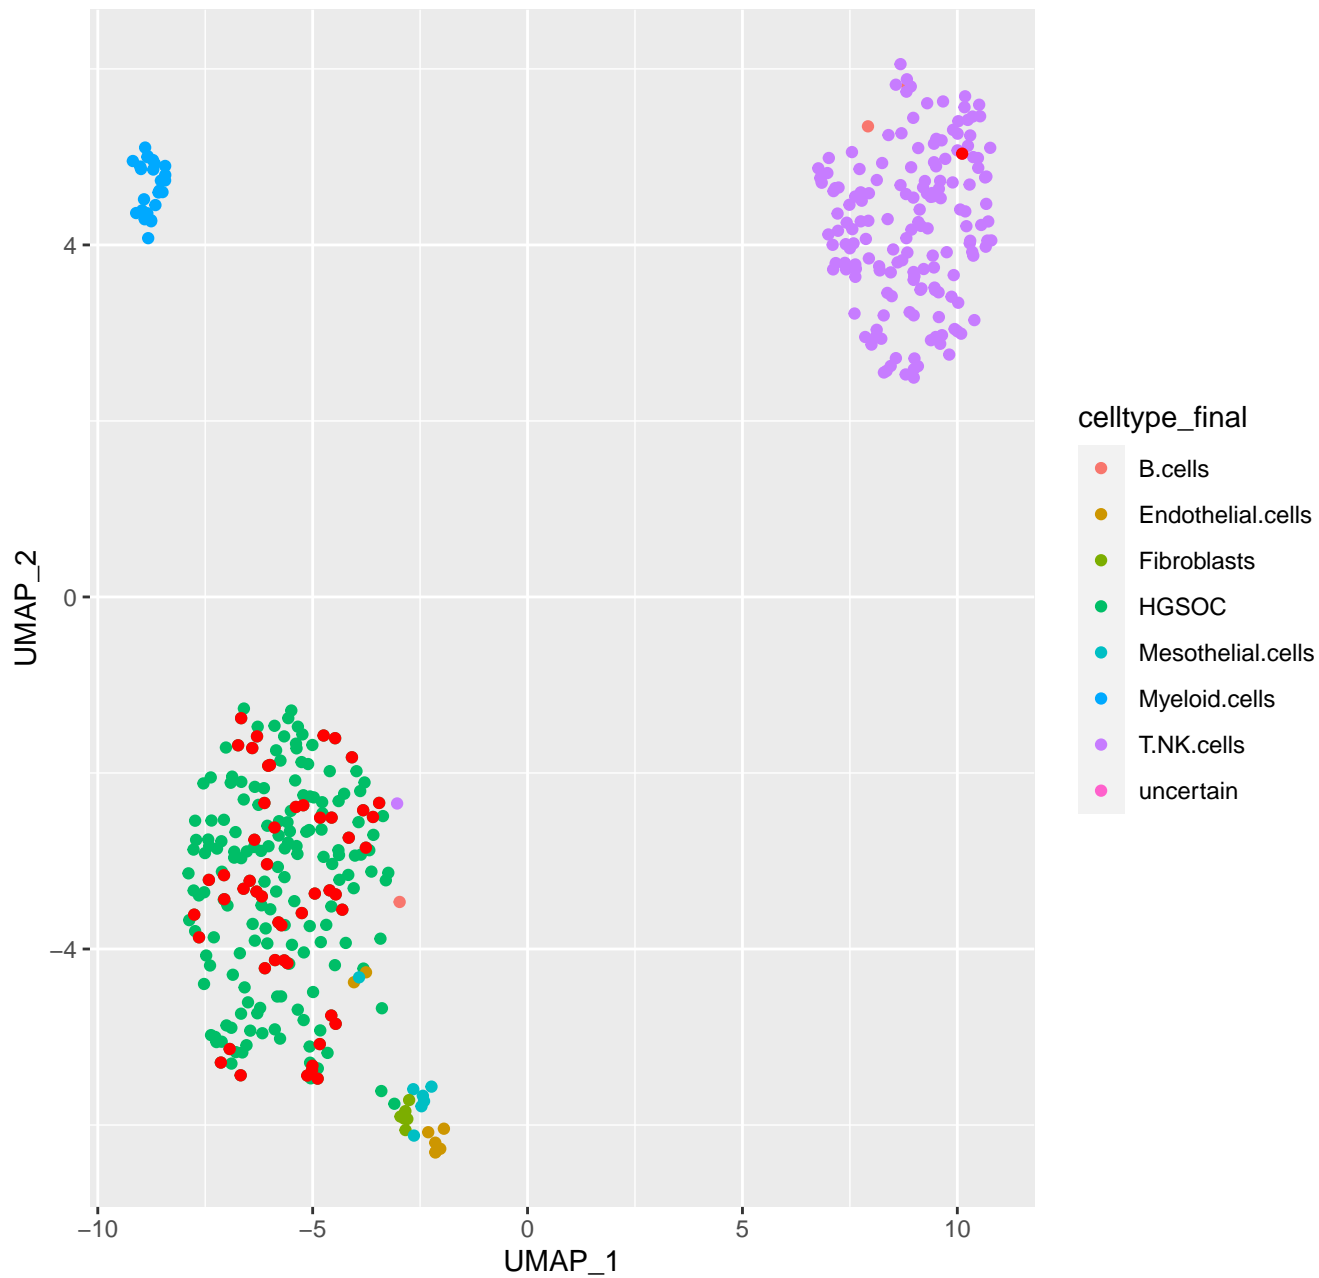

Patient 2 Tumor, Fusion: PSMB7--SCAI



Patient 2 Tumor, Fusion: PSMB7--SCAI





Patient 2 Tumor, Fusion: PSMB7--SCAI



Patient 2 Tumor, Fusion: SRSF7--DHX57

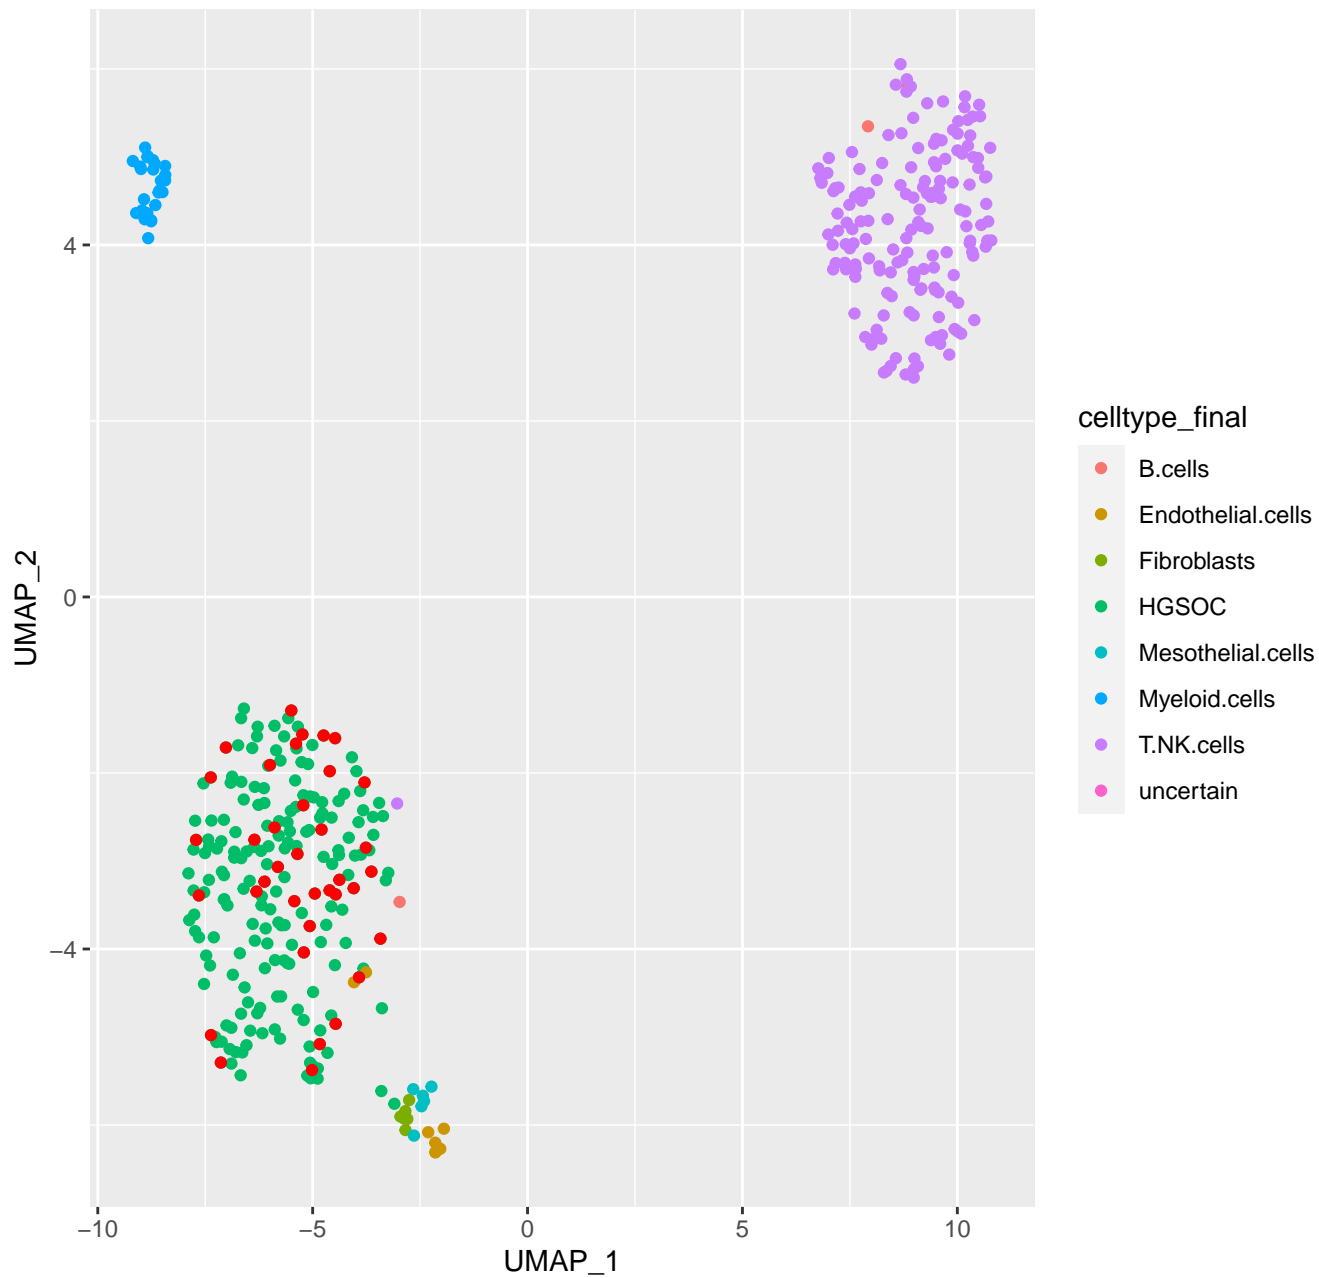

Patient 2 Tumor, Fusion: SRSF7--DHX57



Patient 2 Tumor, Fusion: MIR4435-1HG--DARS

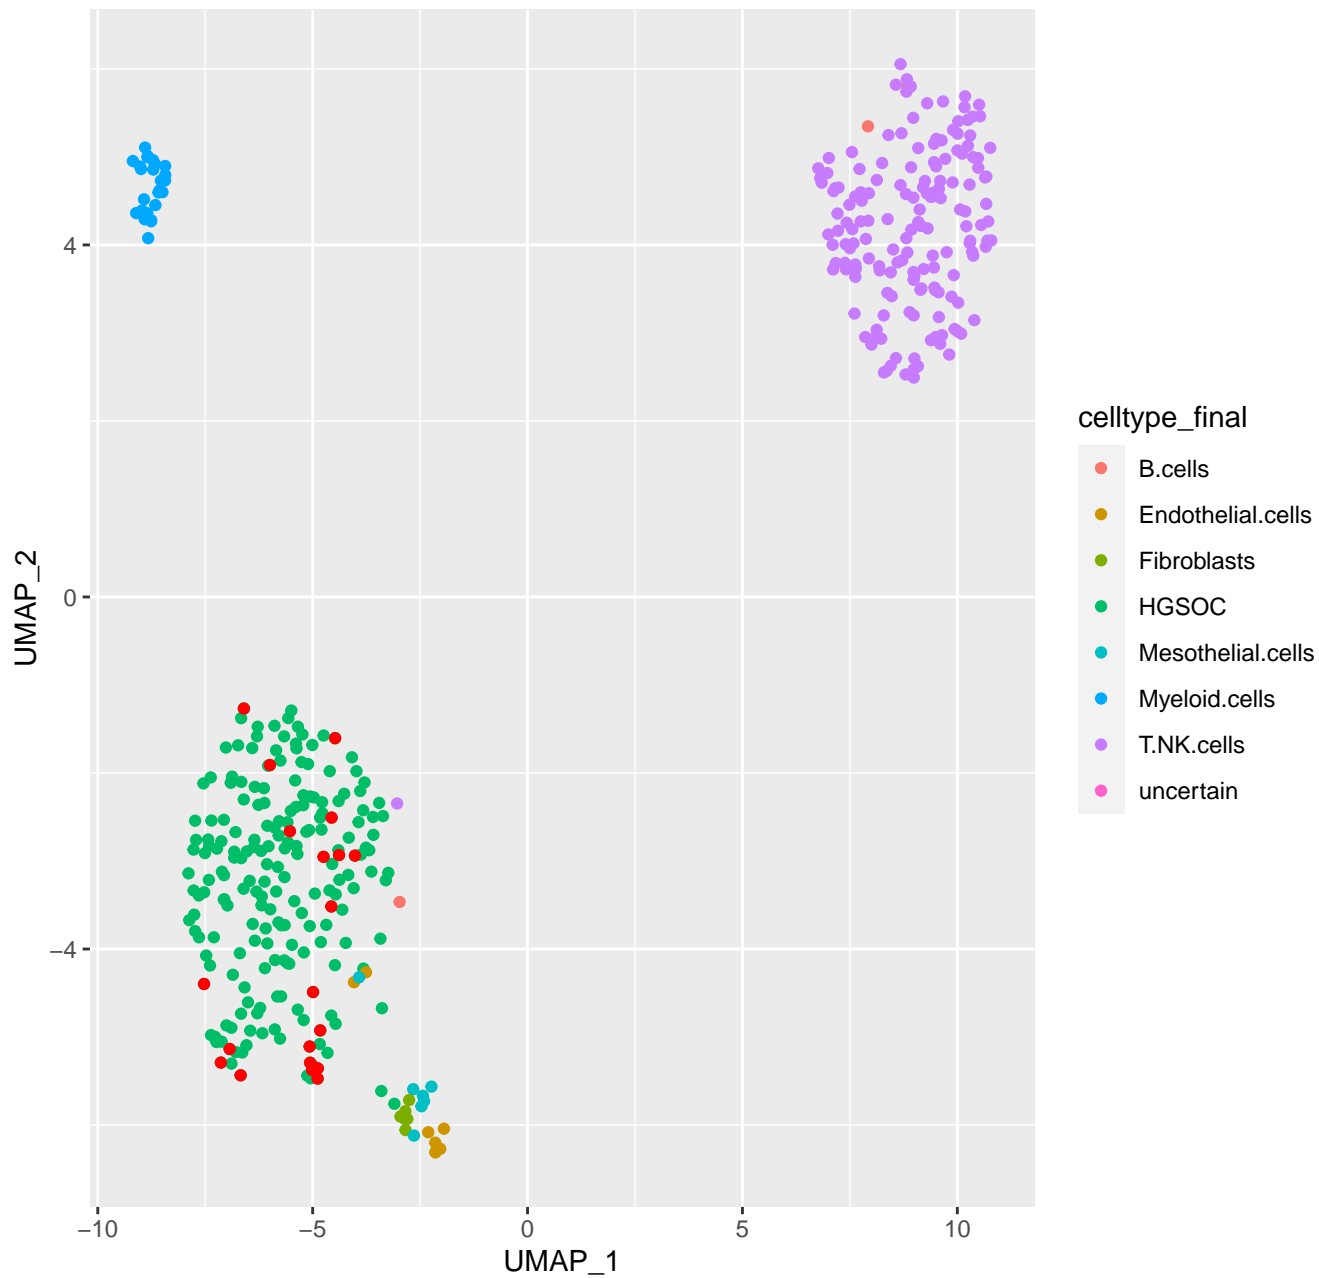

Patient 2 Tumor, Fusion: MIR4435-1HG--DARS



Patient 2 Tumor, Fusion: MIR4435-1HG--DARS



Patient 2 Tumor, Fusion: SPATS2--TRA2B

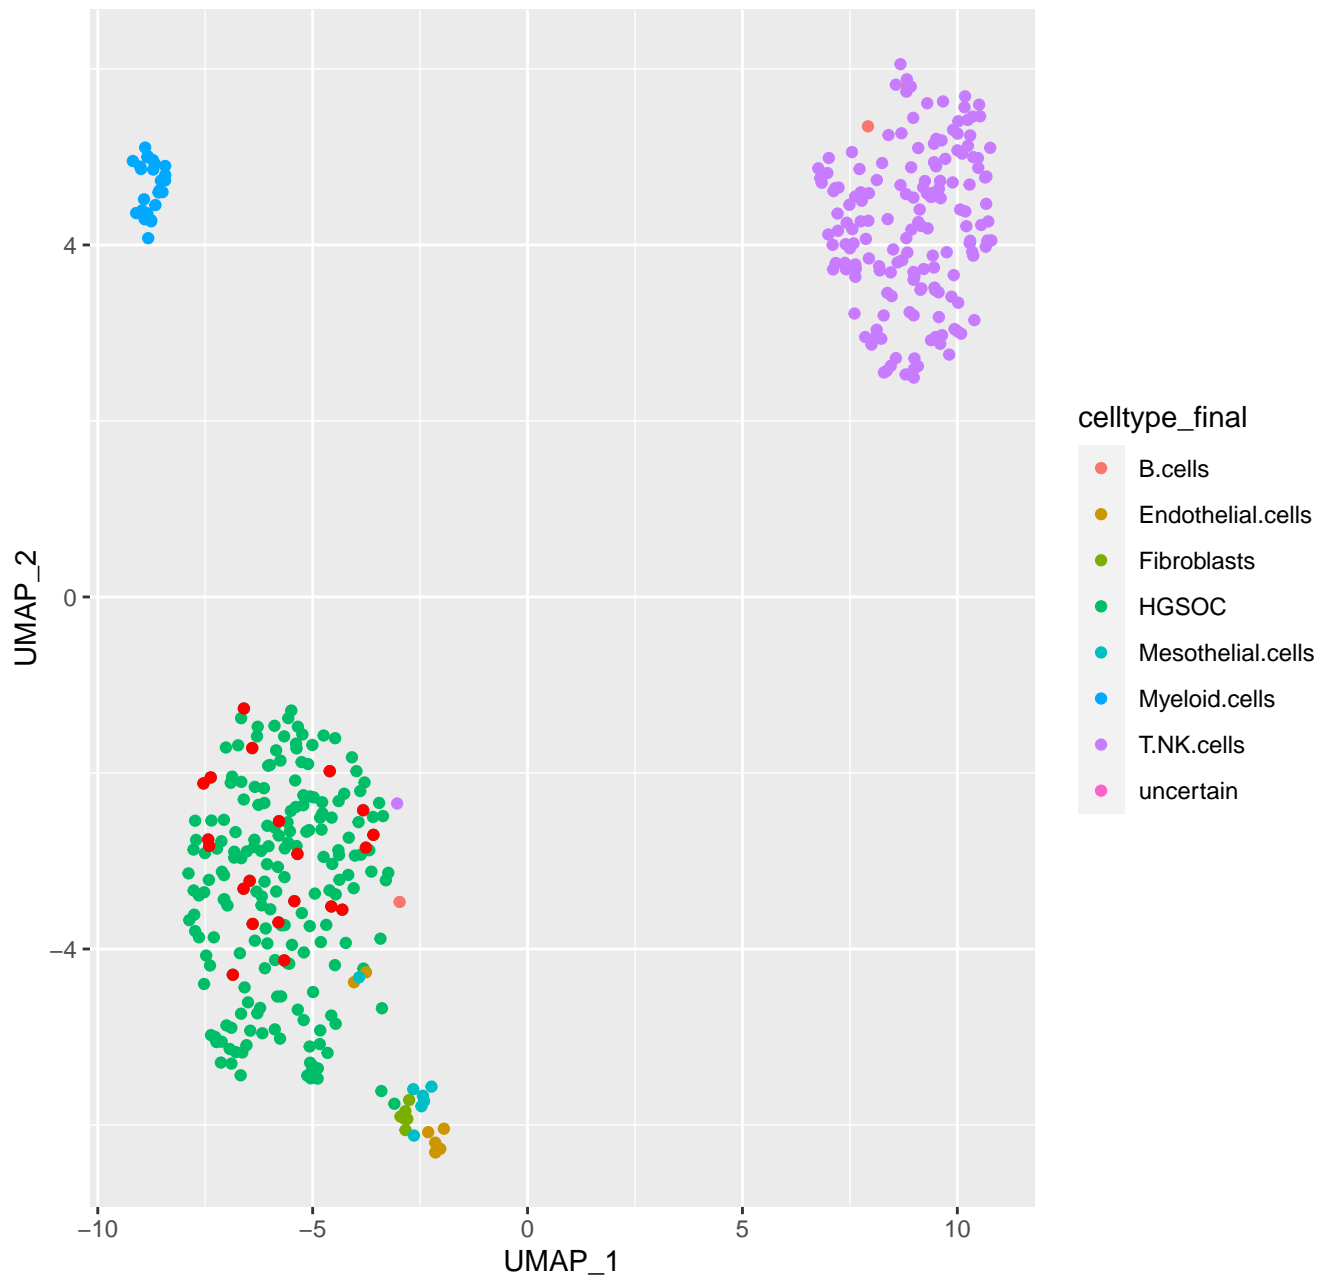

Patient 2 Tumor, Fusion: SPATS2--TRA2B





Patient 2 Tumor, Fusion: CBL--KMT2A

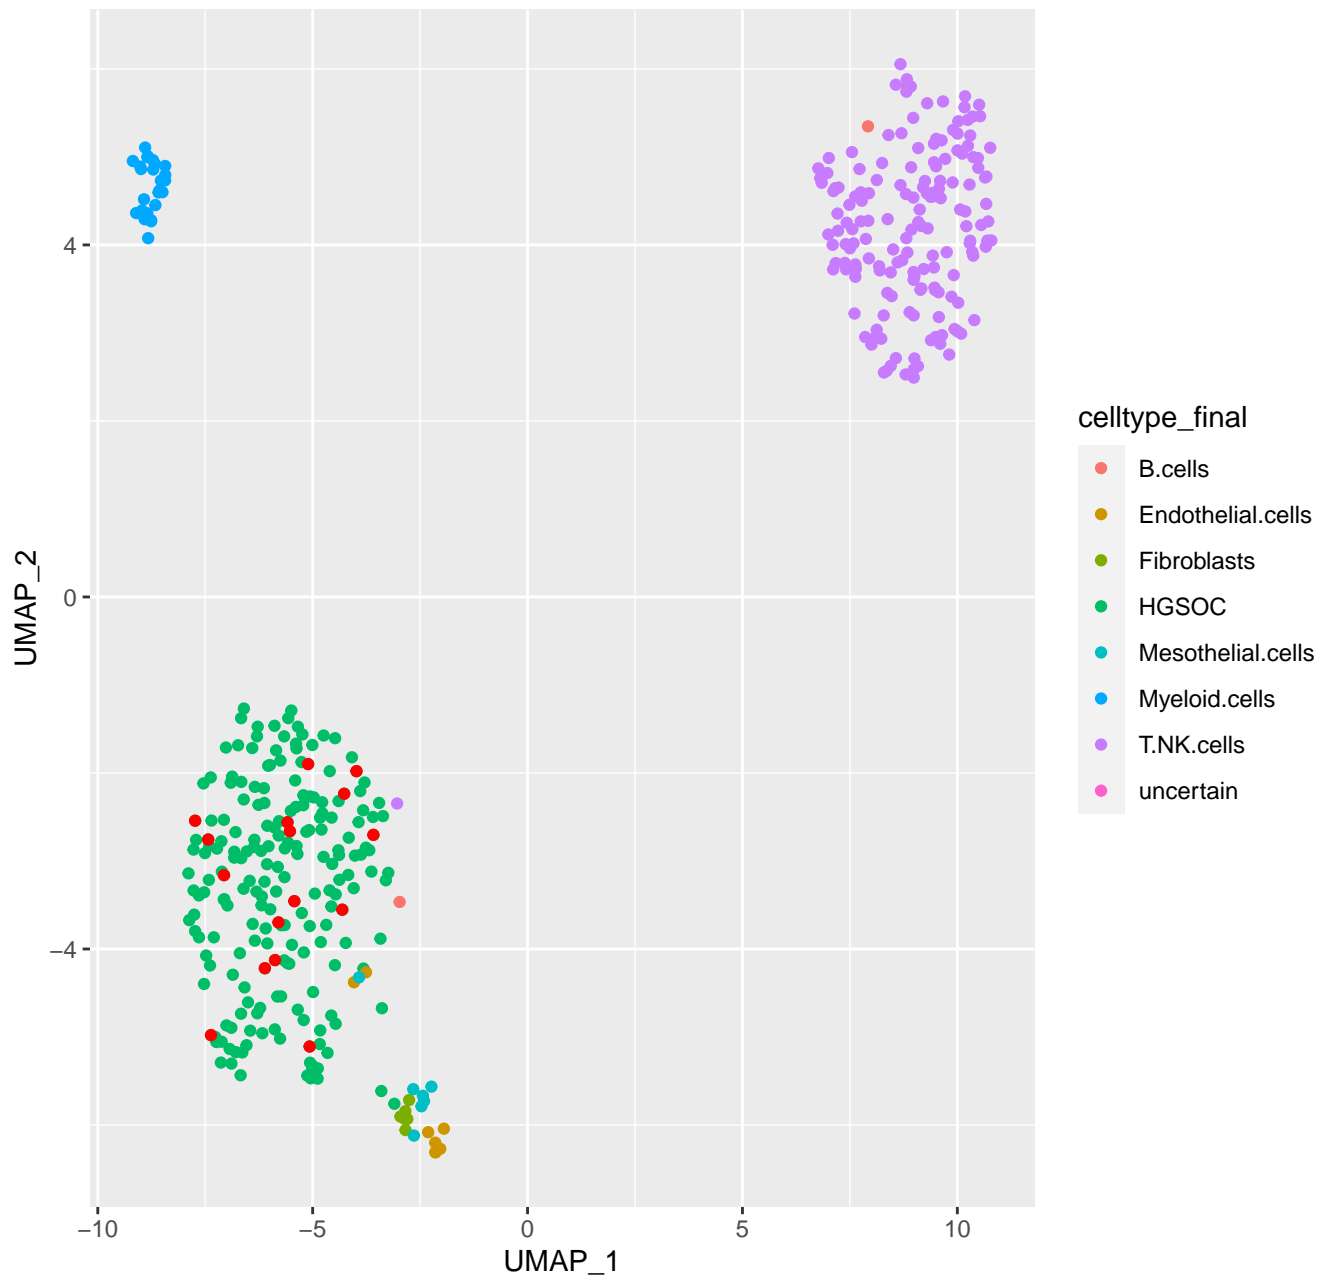

Patient 2 Tumor, Fusion: CBL--KMT2A



Patient 2 Tumor, Fusion: PLXNB2--DENND6B

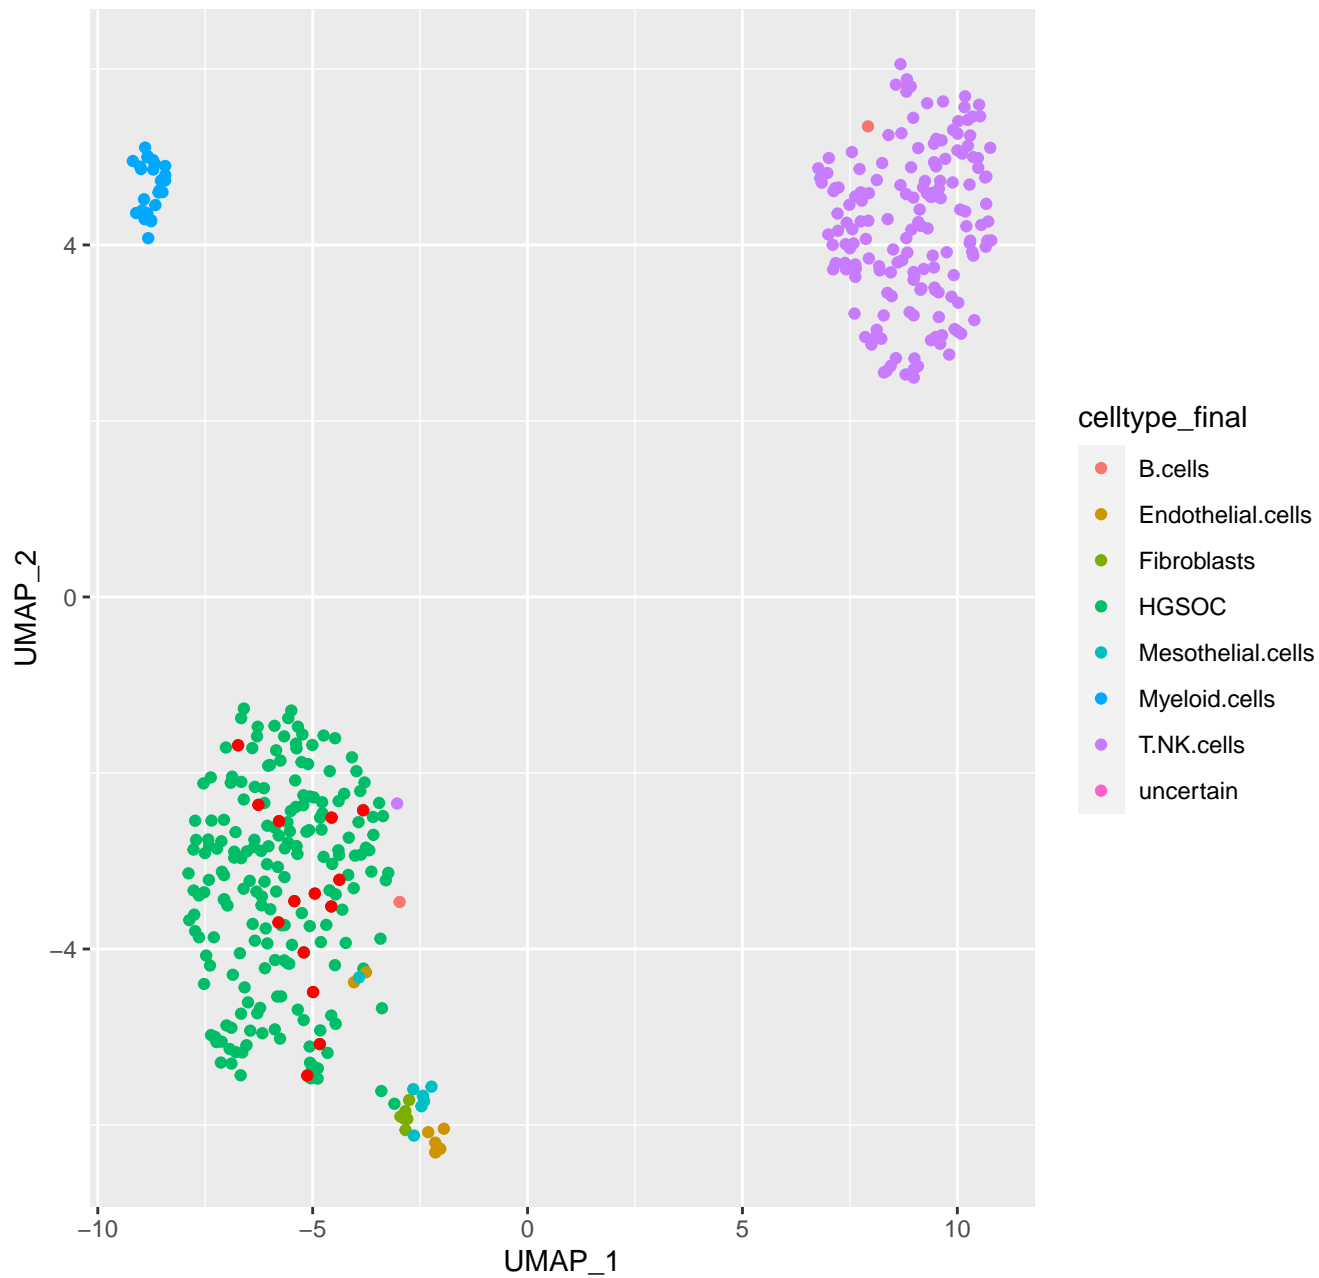

Patient 2 Tumor, Fusion: PLXNB2--DENND6B



Patient 2 Tumor, Fusion: RP11-96H19.1--RP11-446N19.1

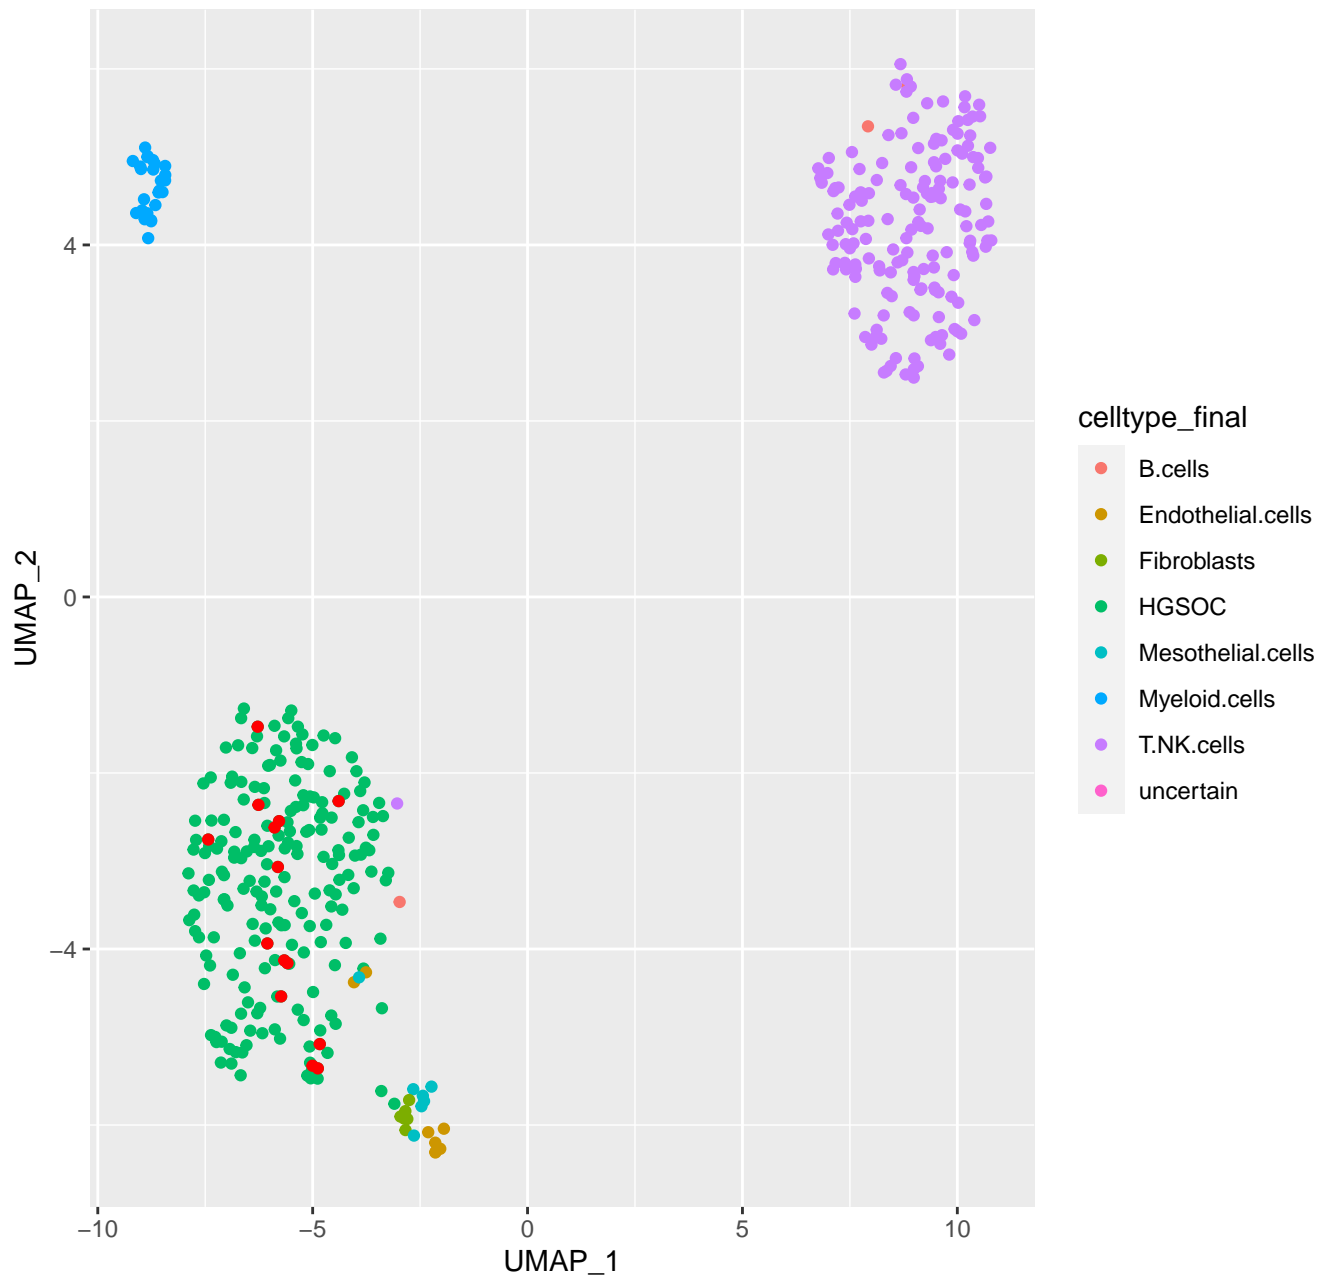

Patient 2 Tumor, Fusion: DEK--CASC17

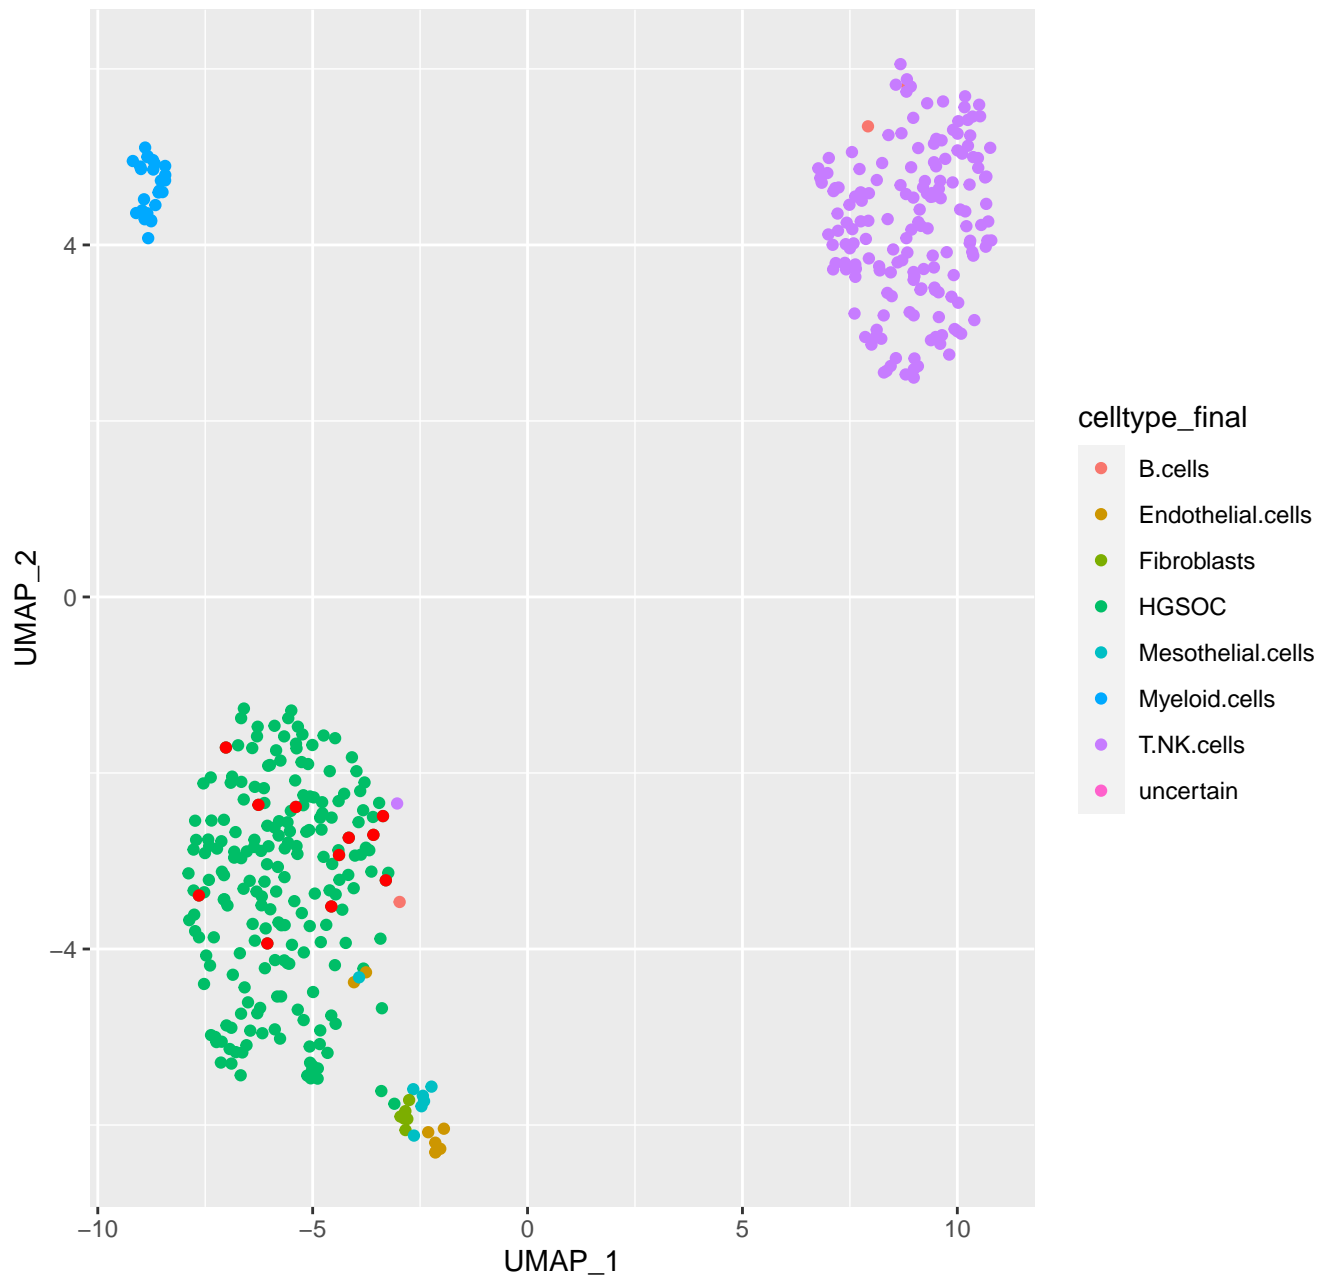

Patient 2 Tumor, Fusion: SLC7A6--ELMO3

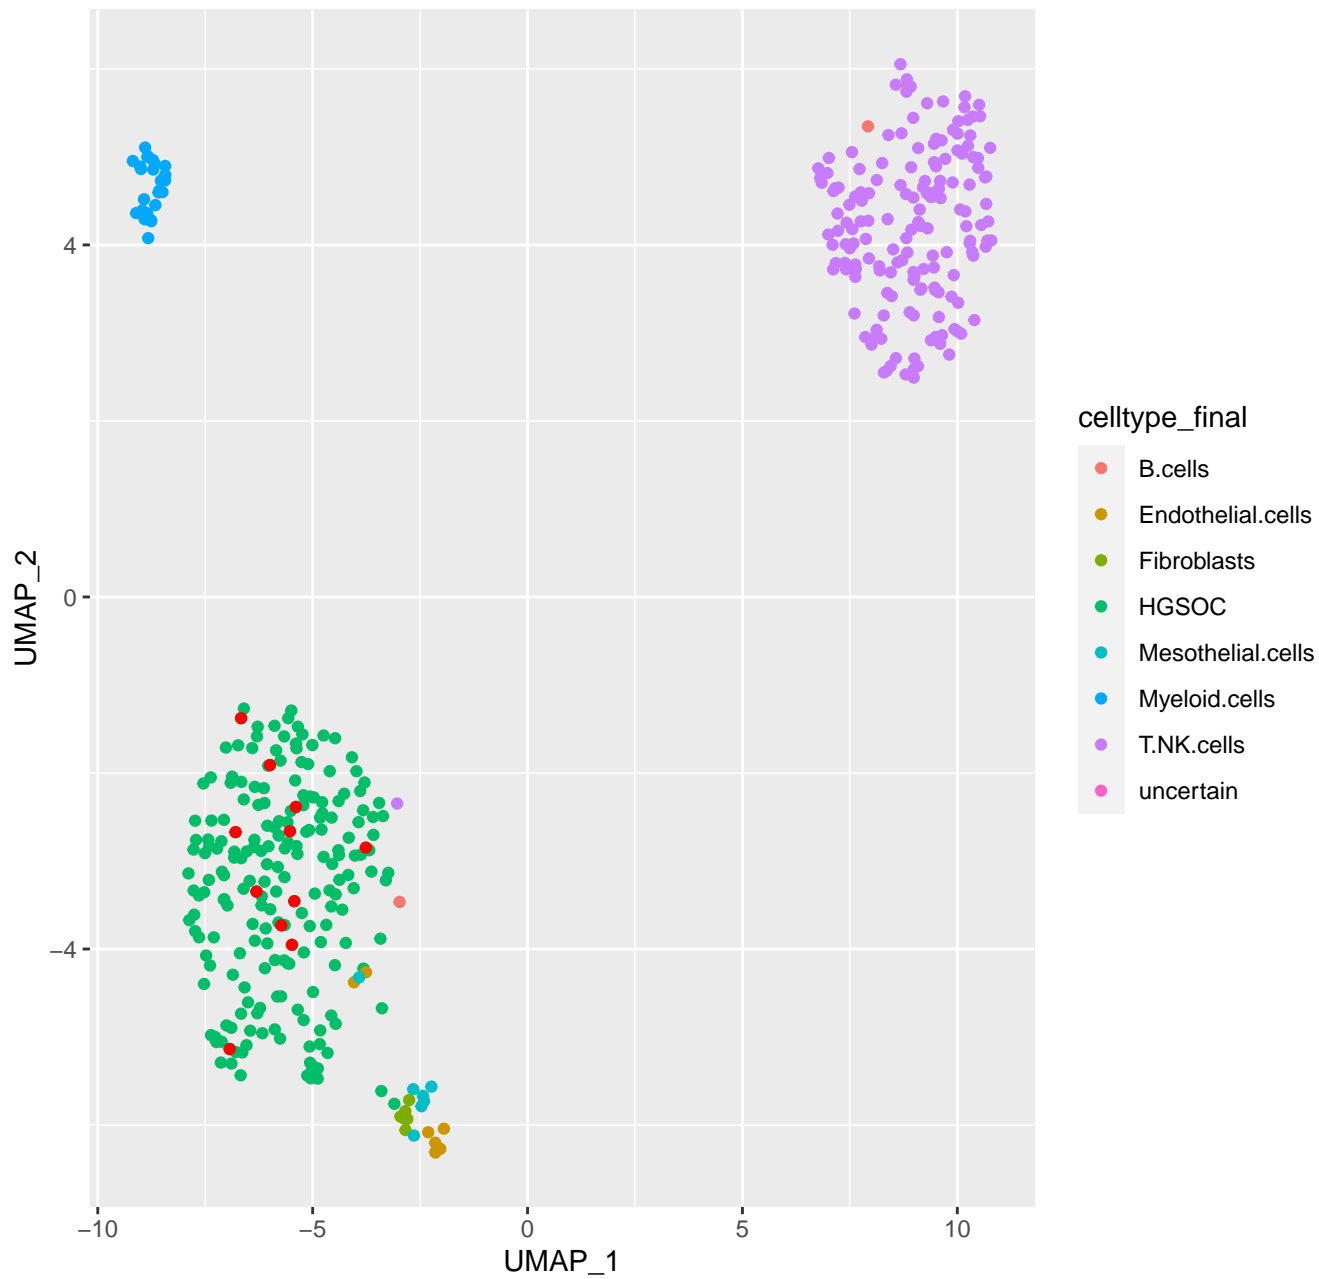

Patient 2 Tumor, Fusion: SLC7A6--ELMO3





Patient 2 Tumor, Fusion: SLC7A6--ELMO3



Patient 2 Tumor, Fusion: SLC7A6--ELMO3



Patient 2 Tumor, Fusion: SLC7A6--ELMO3



Patient 2 Tumor, Fusion: CTD-2008L17.1--RP11-456O19.2

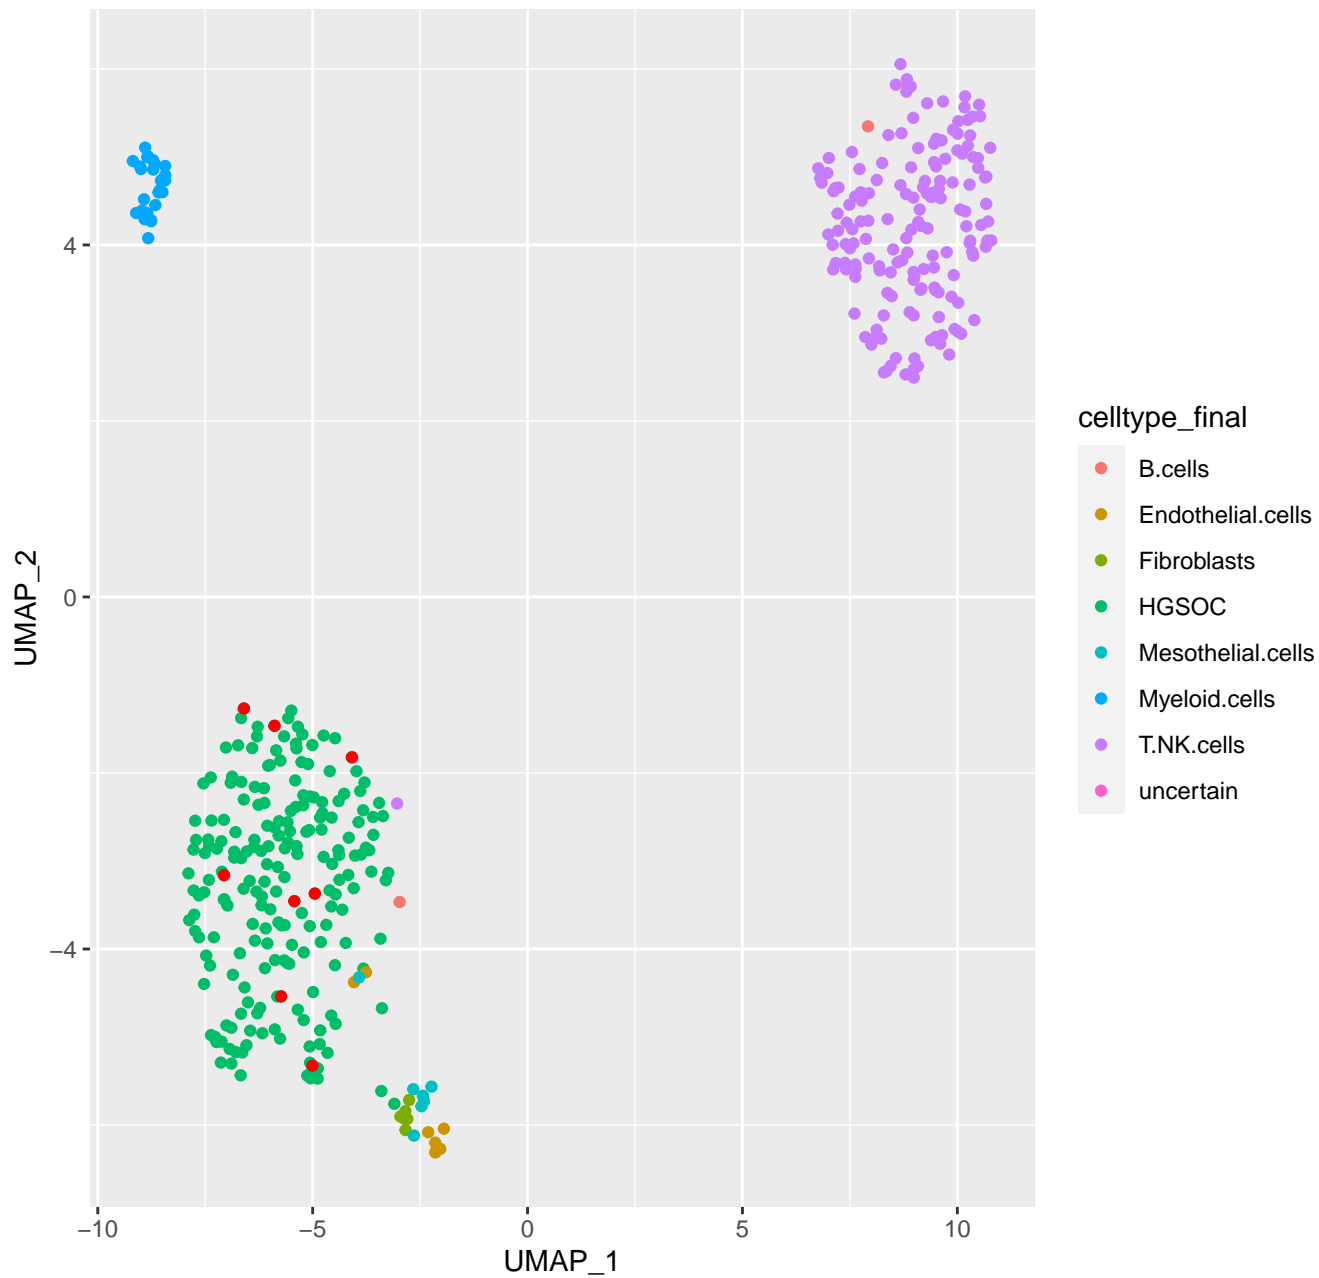

Patient 2 Tumor, Fusion: CTD-2008L17.1--RP11-456O19.2



Patient 2 Tumor, Fusion: TRIM23--RP11-454P21.1

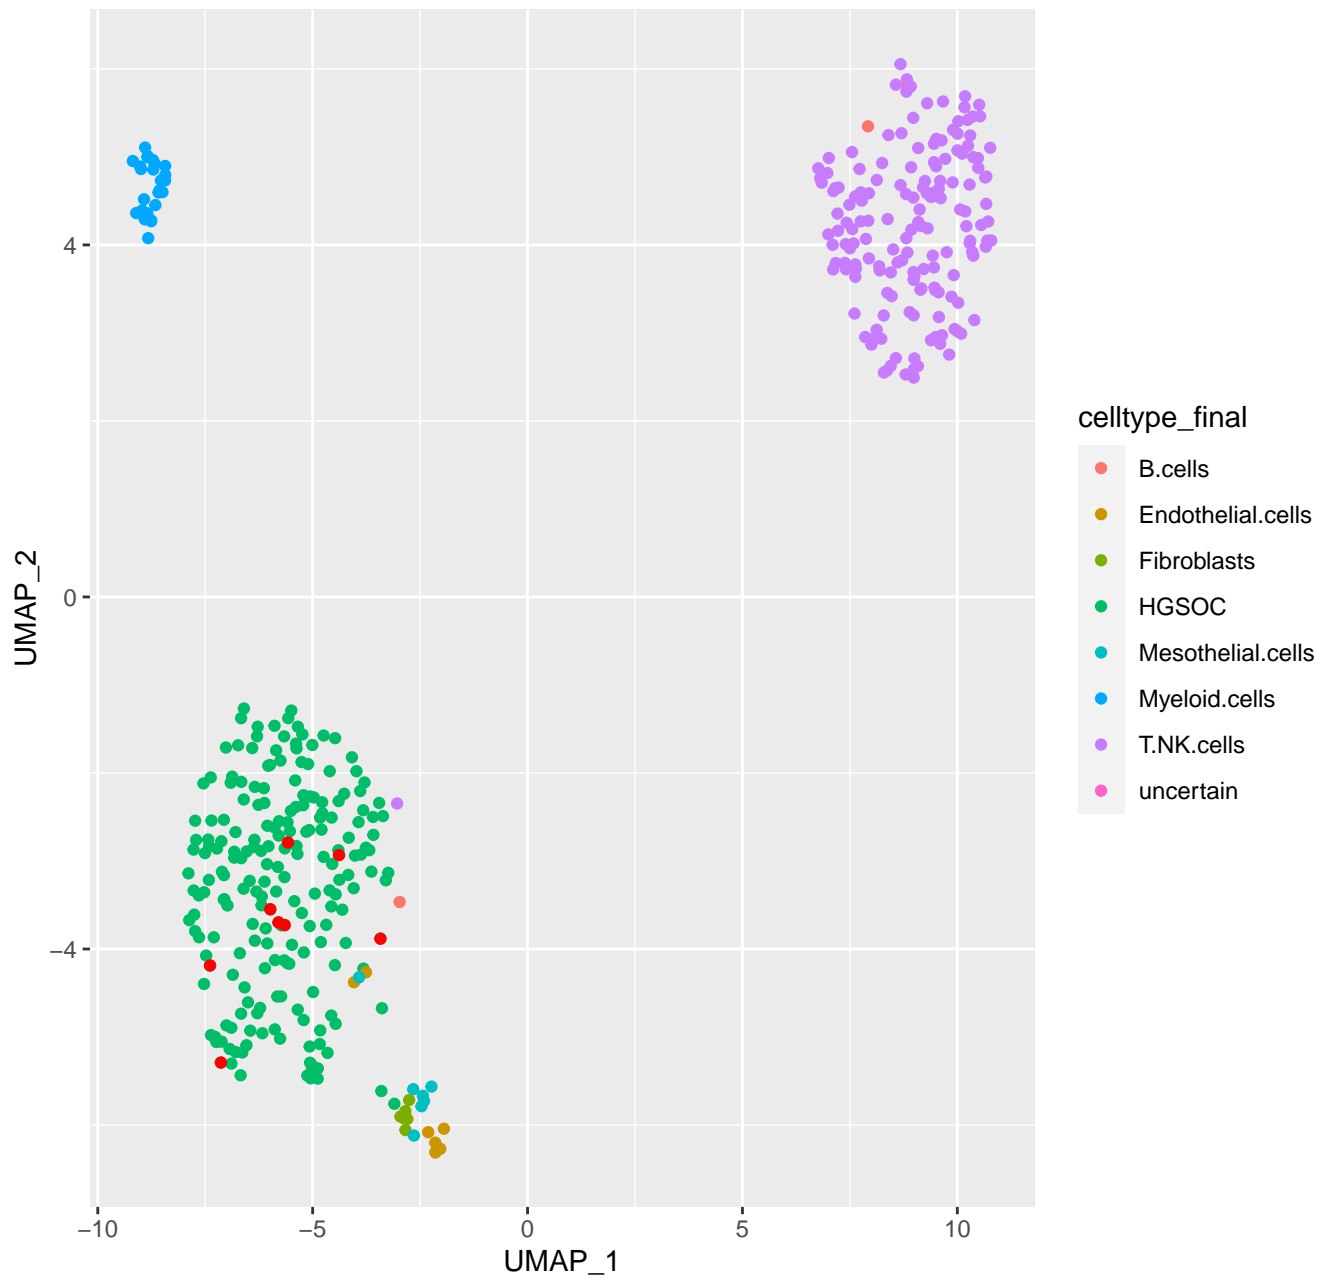

Patient 2 Tumor, Fusion: TRIM23--RP11-454P21.1



Patient 2 Tumor, Fusion: WDR59--AARS

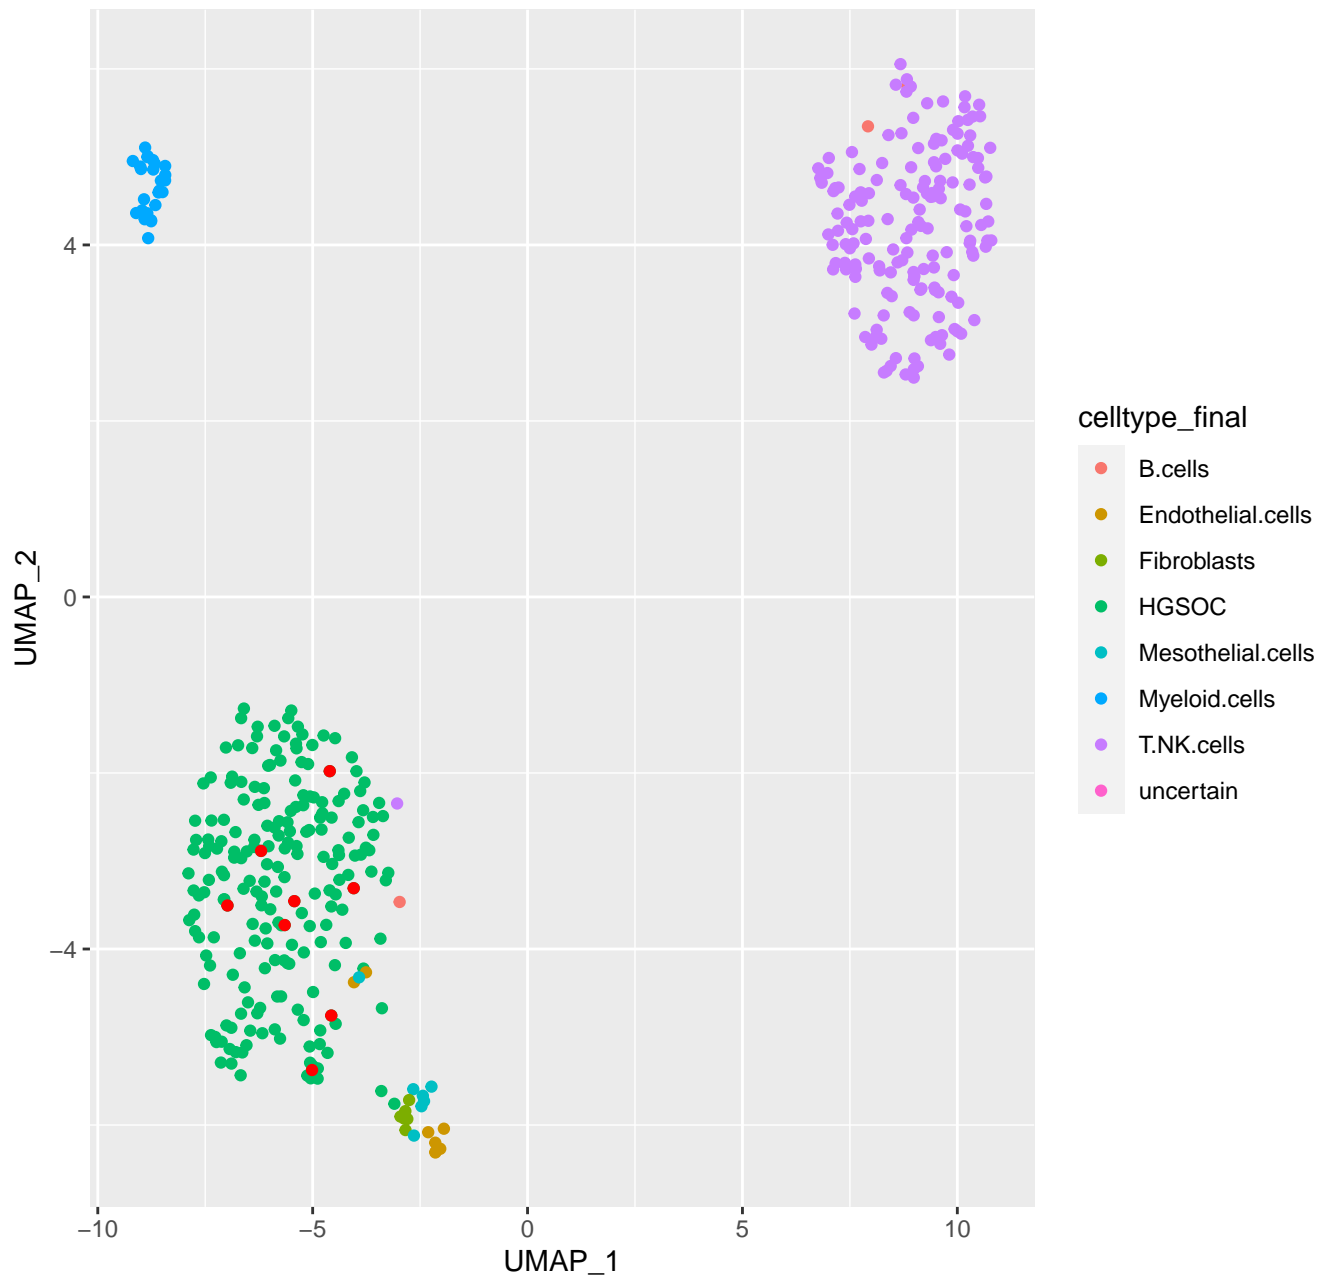



Patient 2 Tumor, Fusion: DUXAP10--LA16c-60G3.6

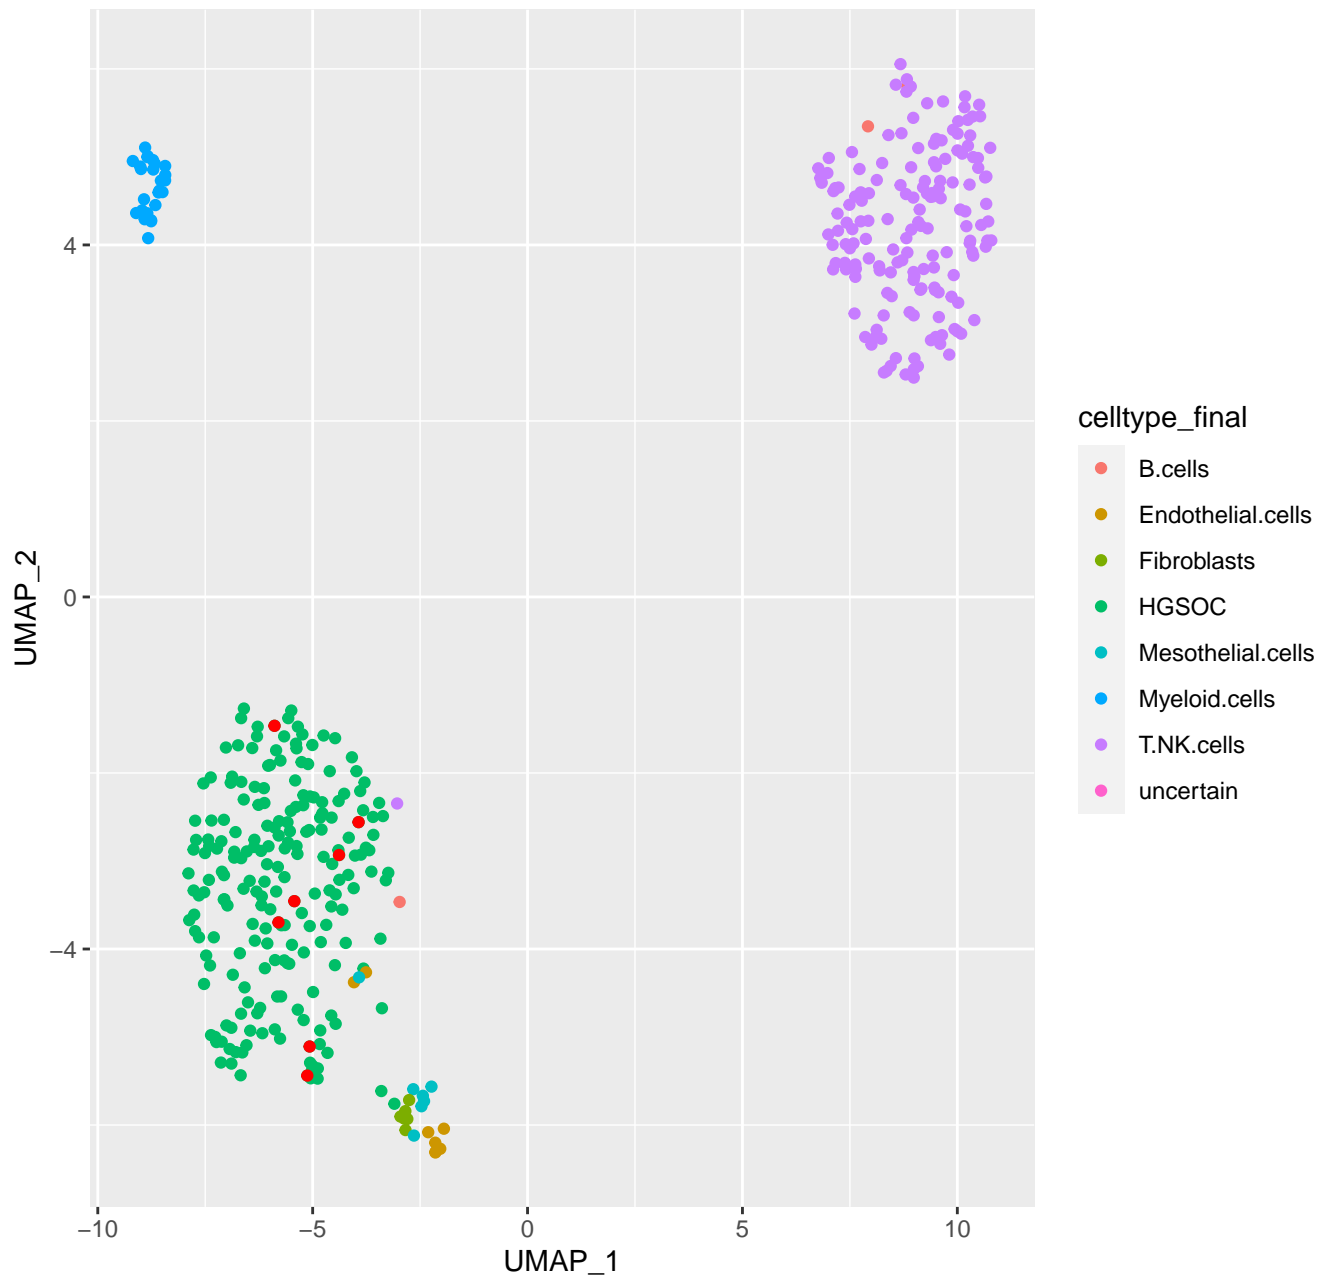

Patient 2 Tumor, Fusion: SMC1B--TBC1D22A

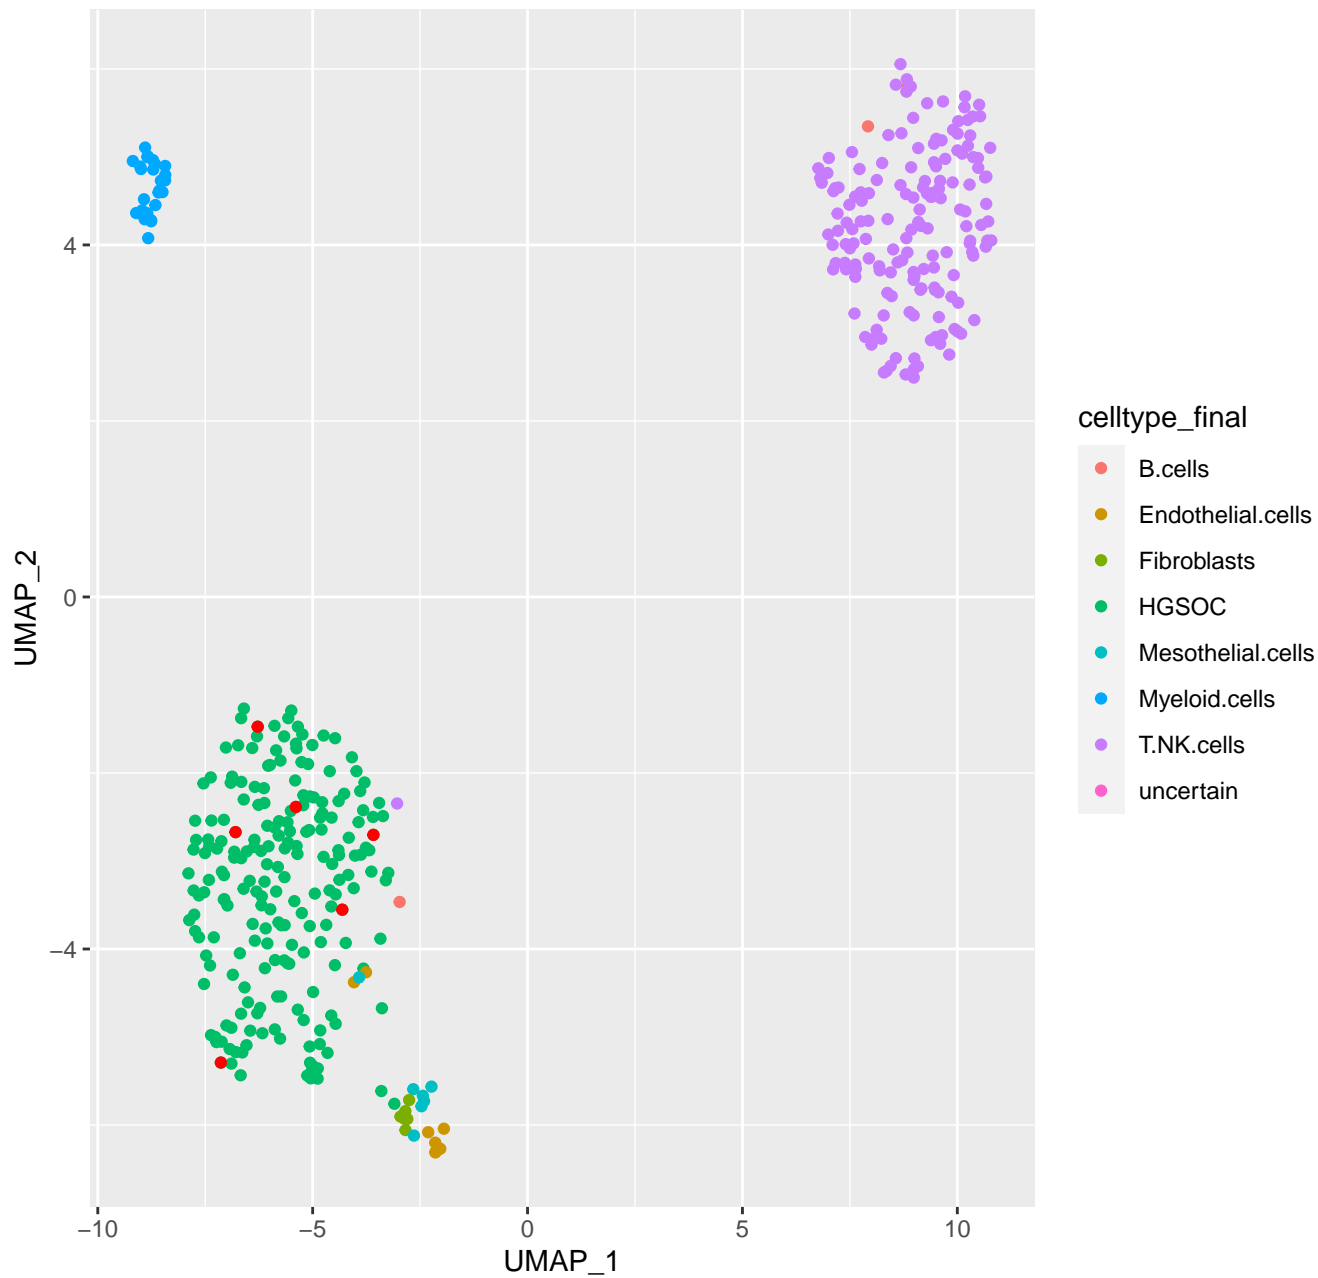

Patient 2 Tumor, Fusion: TBL1XR1--TBL1XR1(22663),LINC00501(43779)

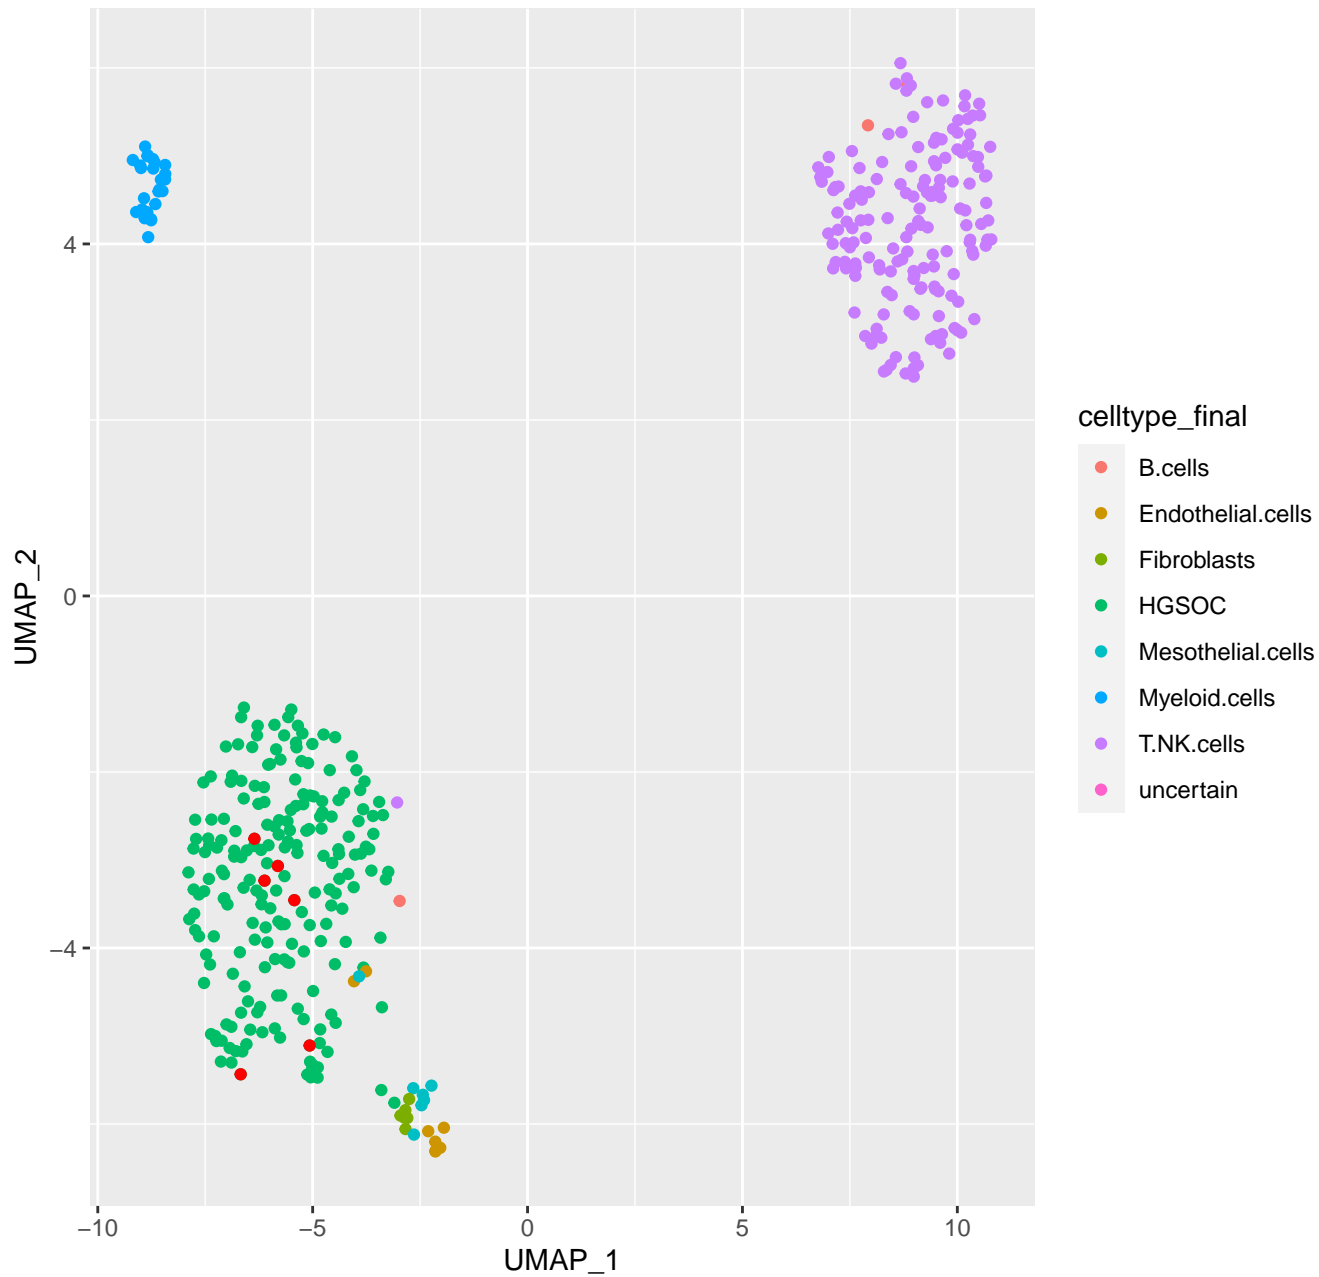

Patient 2 Tumor, Fusion: DEK--RNU7-155P(196402),AC118653.2(101718)

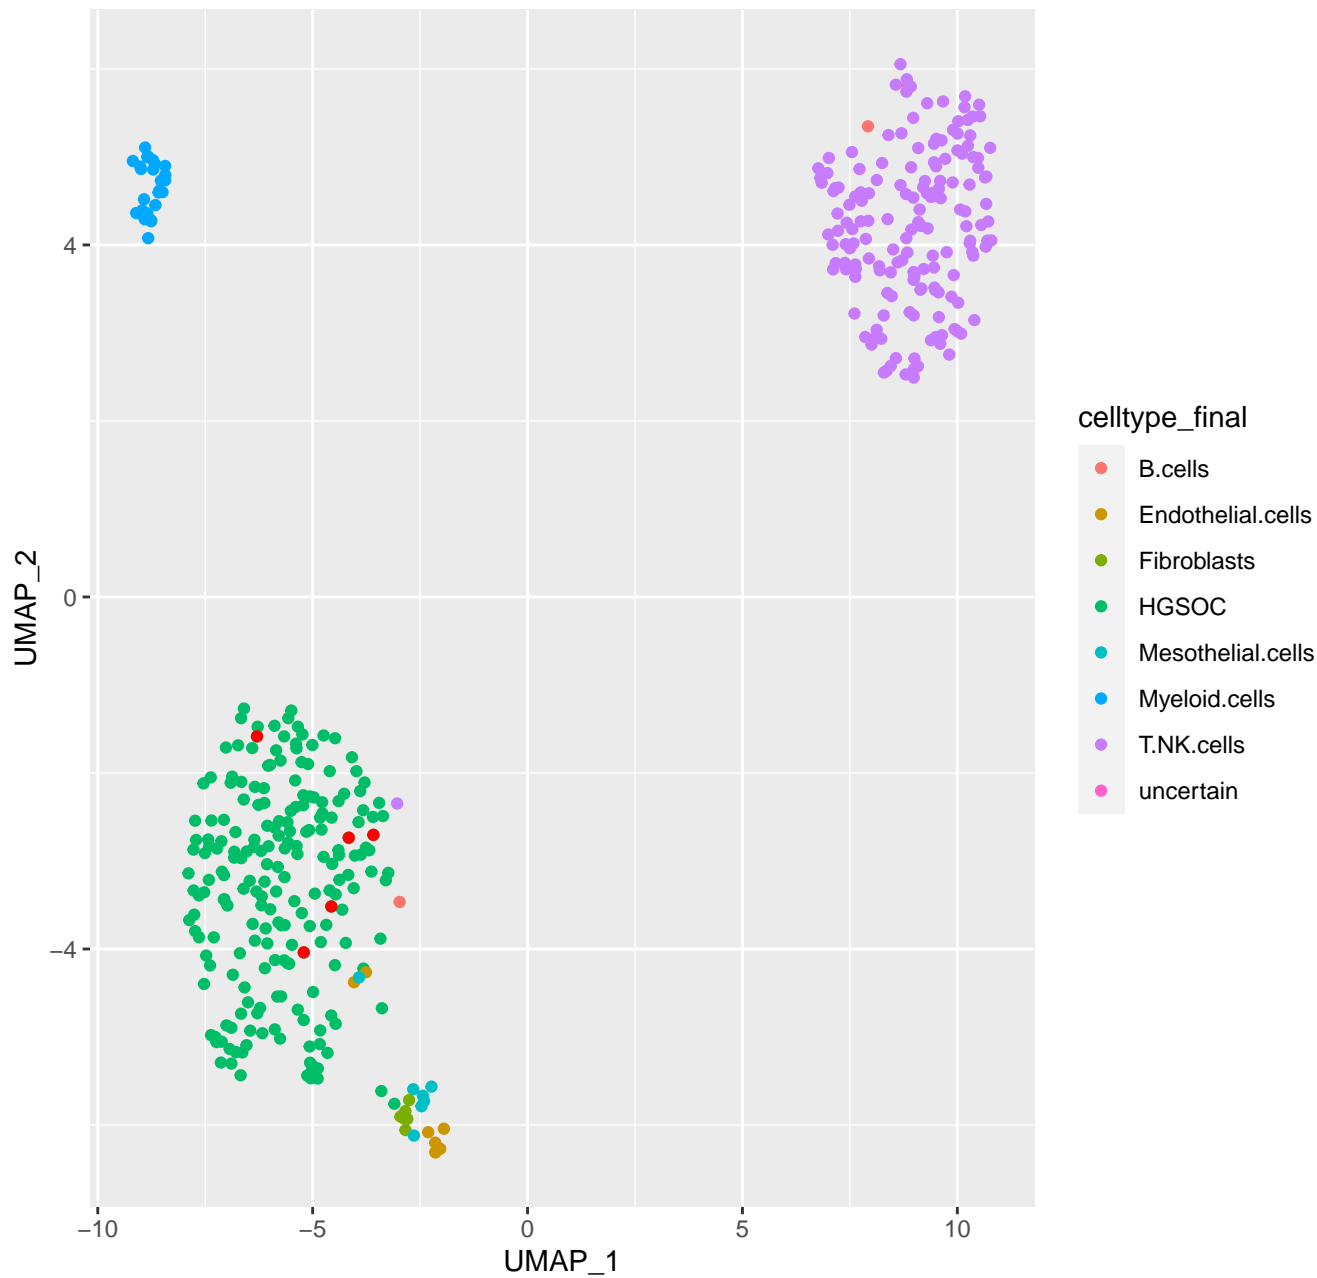

Supplement: Supplemental_File_2.zip [file Patient2_Tum.fusions_of_interest.pdf › CTAT-LRF-Paper/4.SingleCellFusions/4b.sc_HGSOC/Patient2_Tum.fusions_of_interest.pdf]
