# Supplementary material for: Accurate fusion transcript identification from long- and short-read isoform sequencing at bulk or single-cell resolution
Source: Genome Res. 2025 Apr;35(4):967–86. doi: 10.1101/gr.279200.124 (PMC12047241; doi:10.1101/gr.279200.124)
Supplement: Supplement 2 [file Supplemental_Table_S1.xlsx]

## Sheet: Table_S1
# Supplementary Table 1: Data sets analyzed and summary statistics
Dataset	Sample name	read_type	num_reads	Total_bases	Mean_read_length
JAFFAL paper simulated reads	ONT_fus_sim_75err	ONT	17889	38471166	2151
	ONT_fus_sim_80err		17819	38238518	2146
	ONT_fus_sim_85err		17531	37065884	2114
	ONT_fus_sim_90err		17479	37233149	2130
	ONT_fus_sim_95err		17745	41032335	2312
	Pac_fus_sim_75err	PacBio	17500	38474994	2199
	Pac_fus_sim_80err		17779	38232265	2150
	Pac_fus_sim_85err		17566	37074060	2111
	Pac_fus_sim_90err		17500	37233139	2128
	Pac_fus_sim_95err		17495	41032742	2345
PBSIM3 - PacBio HiFi	PBSIM3.rep1_cov50_pass20_sample1	PacBio HiFi - simulated by pbsim3	24953	64060433	2567
	PBSIM3.rep1_cov50_pass20_sample2		24962	62626157	2509
	PBSIM3.rep1_cov50_pass20_sample3		24932	60876796	2442
	PBSIM3.rep1_cov50_pass20_sample4		24925	59285792	2379
	PBSIM3.rep1_cov50_pass20_sample5		24961	59386995	2379
	PBSIM3.rep1_cov5_pass20_sample1		2494	6403981	2568
	PBSIM3.rep1_cov5_pass20_sample2		2491	6265462	2515
	PBSIM3.rep1_cov5_pass20_sample3		2490	6095392	2448
	PBSIM3.rep1_cov5_pass20_sample4		2496	5933995	2377
	PBSIM3.rep1_cov5_pass20_sample5		2495	5936423	2379
PBSIM3 - ONT	ONT.PBSIM3.rep1_cov50_pass1_sample1	ONT R10.4.1 - simulated by pbsim3	25000	63713039	2549
	ONT.PBSIM3.rep1_cov50_pass1_sample2		25000	62305005	2492
	ONT.PBSIM3.rep1_cov50_pass1_sample3		25000	60559447	2422
	ONT.PBSIM3.rep1_cov50_pass1_sample4		25000	58980024	2359
	ONT.PBSIM3.rep1_cov50_pass1_sample5		25000	59004291	2360
	ONT.PBSIM3.rep1_cov5_pass1_sample1		2500	6369624	2548
	ONT.PBSIM3.rep1_cov5_pass1_sample2		2500	6232790	2493
	ONT.PBSIM3.rep1_cov5_pass1_sample3		2500	6054672	2422
	ONT.PBSIM3.rep1_cov5_pass1_sample4		2500	5900540	2360
	ONT.PBSIM3.rep1_cov5_pass1_sample5		2500	5901576	2361
SeraCare Fusion Mix v4	SeraCare.IsoSeq.m64020e_230609_061545.refined.Oct32023	Iso-seq (PacBio HiFi)	4694529	6171220054	1315
	SeraCarev4Fusion.m64363e_230614_195212.refine.bc08.MASseq	MAS-Iso-seq (PacBio HiFi)	7825468	8319067878	1063
	SeraCarev4Fusion.m64363e_230614_195212.refine.bc09.MASseq	MAS-Iso-seq (PacBio HiFi)	7542912	8089585160	1072
	MDL_163_SeraSeqFusion_1	Illumina TruSeq 151 base paired-ends	6463483	1951971866	151
	MDL_163_SeraSeqFusion_2		10227579	3088728858	151
	MDL_163_SeraSeqFusion_3		9972927	3011823954	151
DepMap Cell Lines	DMS53	MAS-Iso-seq (PacBio HiFi)	4190113	4868902346	1162
	HCC1187		3778562	4264370898	1129
	HCC1395		4438263	4929349314	1111
	K562		6252113	6495127923	1039
	KIJK		2657580	2892955453	1089
	MJ		4831401	5028750800	1041
	RT112		5364382	5883907212	1097
	SKBR3		3401225	4038932605	1187
	VCAP		6072217	6509783853	1072
	DMS53	Illumina TruSeq 151 base paired-ends	34289613	10355463126	151
	HCC1187		41135015	12422774530	151
	HCC1395		39648359	11973804418	151
	K562		37877107	11438886314	151
	KIJK		42275619	12767236938	151
	MJ		42074812	12706593224	151
	RT112		51359283	15510503466	151
	SKBR3		41055132	12398649864	151
	VCAP		32344963	9768178826	151
Melanoma single cell	M132TS	MAS-Iso-seq (PacBio HiFi)	21318885	18089992288	849
	M132TS	Illumina 10Xsc (55 base SE reads)	206793225	11373627375	55
HGSOC single cell	Patient1_Om	HIT-scISOseq (PacBio HiFi)	27700074	22478118727	811
	Patient1_Tum		53882746	45509775924	845
	Patient2_Tum		38804329	33287550700	858
	Patient3_Om		22312333	18124624674	812
	Patient3_Tum		53334730	48413971518	908
	Patient1_Om_S4.10xIllum	Illumina 10Xsc (56 base length SE reads)	36906084	2066740704	56
	Patient1_Tum_S5.10xIllum		34956064	1957539584	56
	Patient2_Tum_S1.10xIllum		69122342	3870851152	56
	Patient3_Om_S3.10xIllum		101669266	5693478896	56
	Patient3_Tum_S2.10xIllum		94921371	5315596776	56
SG-NEx cell lines	SGNex_A549_directRNA_replicate1_run1	ONT	536254	521871912	973
	SGNex_A549_directRNA_replicate4_run1		4731906	5249506360	1109
	SGNex_A549_directRNA_replicate5_run1		1936853	1953186610	1008
	SGNex_A549_directRNA_replicate6_run1		1435444	1560625535	1087
	SGNex_K562_directRNA_replicate1_run1		695205	614732978	884
	SGNex_K562_directRNA_replicate4_run1		1165566	954598951	819
	SGNex_K562_directRNA_replicate5_run1		1073847	891543934	830
	SGNex_K562_directRNA_replicate6_run1		1624792	1208747904	744
	SGNex_MCF7-EV_directRNA_replicate1_run1		2297505	2682389683	1168
	SGNex_MCF7-EV_directRNA_replicate2_run1		1699983	2076122486	1221
	SGNex_A549_cDNAStranded_replicate3_run3		2158437	1655873162	767
	SGNex_A549_cDNAStranded_replicate5_run2		12232845	4370471817	357
	SGNex_A549_cDNA_replicate1_run2		2861374	2278212194	796
	SGNex_A549_directcDNA_replicate1_run3		2138637	2682240149	1254
	SGNex_A549_directcDNA_replicate2_run1		246339	266860991	1083
	SGNex_A549_directcDNA_replicate3_run1		74964	94552447	1261
	SGNex_A549_directcDNA_replicate3_run2		1881992	2329334583	1238
	SGNex_A549_directcDNA_replicate5_run3		1158919	1041644829	899
	SGNex_K562_cDNAStranded_replicate2_run3		2740227	1316296215	480
	SGNex_K562_cDNAStranded_replicate3_run2		7866554	1348038523	171
	SGNex_K562_cDNAStranded_replicate3_run3		4517199	935845513	207
	SGNex_K562_cDNA_replicate1_run3		1351376	1406446406	1041
	SGNex_K562_cDNA_replicate3_run4		10427472	6235318795	598
	SGNex_K562_directcDNA_replicate1_run2		2308149	3033878954	1314
	SGNex_K562_directcDNA_replicate2_run1		326683	351769574	1077
	SGNex_K562_directcDNA_replicate2_run2		280202	265752241	948
	SGNex_K562_directcDNA_replicate3_run1		453065	544008719	1201
	SGNex_K562_directcDNA_replicate4_run2		1920905	2296284055	1195
	SGNex_MCF7_cDNAStranded_replicate2_run1		3988884	1322343317	332
	SGNex_MCF7_cDNAStranded_replicate3_run2		9443897	3181322887	337
	SGNex_MCF7_cDNA_replicate1_run3		2849147	1851900444	650
	SGNex_MCF7_directcDNA_replicate1_run2		833885	1148727931	1378
	SGNex_MCF7_directcDNA_replicate3_run3		1830363	1747370421	955
	SGNex_MCF7_directcDNA_replicate4_run2		4948000	5398520076	1091
	SGNex_A549_Illumina_replicate1_run1	Illumina (151 base PE reads)	44457387	13426130874	151
	SGNex_A549_Illumina_replicate3_run1		52104803	15735650506	151
	SGNex_A549_Illumina_replicate5_run1		48357543	14603977986	151
	SGNex_K562_Illumina_replicate3_run1		54795981	16548386262	151
	SGNex_K562_Illumina_replicate4_run1		55334821	16711115942	151
	SGNex_K562_Illumina_replicate5_run1		48446625	14630880750	151
	SGNex_MCF7_Illumina_replicate2_run1		47821775	14442176050	151
	SGNex_MCF7_Illumina_replicate3_run1		40463393	12219944686	151
	SGNex_MCF7_Illumina_replicate4_run1		48354761	14603137822	151
