# Supplementary material for: Accurate fusion transcript identification from long- and short-read isoform sequencing at bulk or single-cell resolution
Source: Genome Res. 2025 Apr;35(4):967–86. doi: 10.1101/gr.279200.124 (PMC12047241; doi:10.1101/gr.279200.124)
Supplement: Supplement 3 [file Supplemental_Table_S2.xlsx]

## Sheet: Table_S2-benchmarking_JAFFALsim
Table S2: Benchmarking results for fusion prediction methods on the JAFFAL BadRead simulated fusion read sets
# seqtype: sequencing technology simulated.
# seq_identity: targeted sequence identity of the simulated reads
# min_fusion_reads: threshold for minimum fusion read support
# TP: number of true positives
# FP: number of false positives
# FN: number of false negatives
# TPR: true positive rate (ie. recall)
# PPV: positive predictive value (ie. precision)
# F1: F1 score
# analysisType: strict or allow reverse, and allow paralogs as proxies (AP)
seqtype	divergence	prog	min_sum_frags	TP	FP	FN	TPR	PPV	F1	analysisType
ONT	95	JAFFAL	1	419	1	40	0.91	1	0.953	strict_AP
ONT	95	JAFFAL	2	363	1	96	0.79	1	0.883	strict_AP
ONT	95	JAFFAL	3	322	0	137	0.7	1	0.824	strict_AP
ONT	95	JAFFAL	4	298	0	161	0.65	1	0.788	strict_AP
ONT	95	JAFFAL	5	290	0	169	0.63	1	0.773	strict_AP
ONT	95	JAFFAL	6	280	0	179	0.61	1	0.758	strict_AP
ONT	95	JAFFAL	7	270	0	189	0.59	1	0.742	strict_AP
ONT	95	JAFFAL	8	256	0	203	0.56	1	0.718	strict_AP
ONT	95	JAFFAL	9	241	0	218	0.53	1	0.693	strict_AP
ONT	95	JAFFAL	10	227	0	232	0.49	1	0.658	strict_AP
ONT	95	JAFFAL	11	219	0	240	0.48	1	0.649	strict_AP
ONT	95	JAFFAL	12	212	0	247	0.46	1	0.63	strict_AP
ONT	95	JAFFAL	13	203	0	256	0.44	1	0.611	strict_AP
ONT	95	JAFFAL	14	199	0	260	0.43	1	0.601	strict_AP
ONT	95	JAFFAL	15	196	0	263	0.43	1	0.601	strict_AP
ONT	95	JAFFAL	16	194	0	265	0.42	1	0.592	strict_AP
ONT	95	JAFFAL	18	192	0	267	0.42	1	0.592	strict_AP
ONT	95	JAFFAL	20	191	0	268	0.42	1	0.592	strict_AP
ONT	95	JAFFAL	21	189	0	270	0.41	1	0.582	strict_AP
ONT	95	JAFFAL	23	188	0	271	0.41	1	0.582	strict_AP
ONT	95	JAFFAL	25	185	0	274	0.4	1	0.571	strict_AP
ONT	95	JAFFAL	27	183	0	276	0.4	1	0.571	strict_AP
ONT	95	JAFFAL	28	181	0	278	0.39	1	0.561	strict_AP
ONT	95	JAFFAL	29	179	0	280	0.39	1	0.561	strict_AP
ONT	95	JAFFAL	30	177	0	282	0.39	1	0.561	strict_AP
ONT	95	JAFFAL	32	176	0	283	0.38	1	0.551	strict_AP
ONT	95	JAFFAL	35	175	0	284	0.38	1	0.551	strict_AP
ONT	95	JAFFAL	36	170	0	289	0.37	1	0.54	strict_AP
ONT	95	JAFFAL	37	167	0	292	0.36	1	0.529	strict_AP
ONT	95	JAFFAL	38	165	0	294	0.36	1	0.529	strict_AP
ONT	95	JAFFAL	39	163	0	296	0.36	1	0.529	strict_AP
ONT	95	JAFFAL	40	160	0	299	0.35	1	0.519	strict_AP
ONT	95	JAFFAL	41	158	0	301	0.34	1	0.507	strict_AP
ONT	95	JAFFAL	42	156	0	303	0.34	1	0.507	strict_AP
ONT	95	JAFFAL	43	152	0	307	0.33	1	0.496	strict_AP
ONT	95	JAFFAL	44	147	0	312	0.32	1	0.485	strict_AP
ONT	95	JAFFAL	45	143	0	316	0.31	1	0.473	strict_AP
ONT	95	JAFFAL	46	136	0	323	0.3	1	0.462	strict_AP
ONT	95	JAFFAL	47	134	0	325	0.29	1	0.45	strict_AP
ONT	95	JAFFAL	48	126	0	333	0.27	1	0.425	strict_AP
ONT	95	JAFFAL	49	125	0	334	0.27	1	0.425	strict_AP
ONT	95	JAFFAL	50	121	0	338	0.26	1	0.413	strict_AP
ONT	95	JAFFAL	51	114	0	345	0.25	1	0.4	strict_AP
ONT	95	JAFFAL	53	108	0	351	0.24	1	0.387	strict_AP
ONT	95	JAFFAL	54	105	0	354	0.23	1	0.374	strict_AP
ONT	95	JAFFAL	55	102	0	357	0.22	1	0.361	strict_AP
ONT	95	JAFFAL	56	98	0	361	0.21	1	0.347	strict_AP
ONT	95	JAFFAL	57	94	0	365	0.2	1	0.333	strict_AP
ONT	95	JAFFAL	58	91	0	368	0.2	1	0.333	strict_AP
ONT	95	JAFFAL	60	89	0	370	0.19	1	0.319	strict_AP
ONT	95	JAFFAL	61	87	0	372	0.19	1	0.319	strict_AP
ONT	95	JAFFAL	63	84	0	375	0.18	1	0.305	strict_AP
ONT	95	JAFFAL	65	83	0	376	0.18	1	0.305	strict_AP
ONT	95	JAFFAL	68	82	0	377	0.18	1	0.305	strict_AP
ONT	95	JAFFAL	69	81	0	378	0.18	1	0.305	strict_AP
ONT	95	JAFFAL	71	80	0	379	0.17	1	0.291	strict_AP
ONT	95	JAFFAL	75	79	0	380	0.17	1	0.291	strict_AP
ONT	95	JAFFAL	76	78	0	381	0.17	1	0.291	strict_AP
ONT	95	JAFFAL	77	77	0	382	0.17	1	0.291	strict_AP
ONT	95	JAFFAL	78	75	0	384	0.16	1	0.276	strict_AP
ONT	95	JAFFAL	80	74	0	385	0.16	1	0.276	strict_AP
ONT	95	JAFFAL	81	72	0	387	0.16	1	0.276	strict_AP
ONT	95	JAFFAL	82	71	0	388	0.15	1	0.261	strict_AP
ONT	95	JAFFAL	84	67	0	392	0.15	1	0.261	strict_AP
ONT	95	JAFFAL	85	66	0	393	0.14	1	0.246	strict_AP
ONT	95	JAFFAL	86	61	0	398	0.13	1	0.23	strict_AP
ONT	95	JAFFAL	87	57	0	402	0.12	1	0.214	strict_AP
ONT	95	JAFFAL	88	54	0	405	0.12	1	0.214	strict_AP
ONT	95	JAFFAL	89	53	0	406	0.12	1	0.214	strict_AP
ONT	95	JAFFAL	90	51	0	408	0.11	1	0.198	strict_AP
ONT	95	JAFFAL	91	45	0	414	0.1	1	0.182	strict_AP
ONT	95	JAFFAL	92	42	0	417	0.09	1	0.165	strict_AP
ONT	95	JAFFAL	93	41	0	418	0.09	1	0.165	strict_AP
ONT	95	JAFFAL	94	37	0	422	0.08	1	0.148	strict_AP
ONT	95	JAFFAL	95	36	0	423	0.08	1	0.148	strict_AP
ONT	95	JAFFAL	96	33	0	426	0.07	1	0.131	strict_AP
ONT	95	JAFFAL	97	30	0	429	0.07	1	0.131	strict_AP
ONT	95	JAFFAL	98	28	0	431	0.06	1	0.113	strict_AP
ONT	95	JAFFAL	99	26	0	433	0.06	1	0.113	strict_AP
ONT	95	JAFFAL	100	24	0	435	0.05	1	0.095	strict_AP
ONT	95	JAFFAL	101	23	0	436	0.05	1	0.095	strict_AP
ONT	95	JAFFAL	102	21	0	438	0.05	1	0.095	strict_AP
ONT	95	JAFFAL	103	17	0	442	0.04	1	0.077	strict_AP
ONT	95	JAFFAL	104	16	0	443	0.03	1	0.058	strict_AP
ONT	95	JAFFAL	105	14	0	445	0.03	1	0.058	strict_AP
ONT	95	JAFFAL	106	13	0	446	0.03	1	0.058	strict_AP
ONT	95	JAFFAL	107	12	0	447	0.03	1	0.058	strict_AP
ONT	95	JAFFAL	109	11	0	448	0.02	1	0.039	strict_AP
ONT	95	JAFFAL	111	8	0	451	0.02	1	0.039	strict_AP
ONT	95	JAFFAL	114	6	0	453	0.01	1	0.02	strict_AP
ONT	95	JAFFAL	117	5	0	454	0.01	1	0.02	strict_AP
ONT	95	JAFFAL	119	2	0	457	0	1	0	strict_AP
ONT	95	JAFFAL	129	1	0	458	0	1	0	strict_AP
ONT	95	pbfusion	1	38	1	421	0.08	0.97	0.148	strict_AP
ONT	95	pbfusion	2	30	1	429	0.07	0.97	0.131	strict_AP
ONT	95	pbfusion	3	28	1	431	0.06	0.97	0.113	strict_AP
ONT	95	pbfusion	4	26	0	433	0.06	1	0.113	strict_AP
ONT	95	pbfusion	5	23	0	436	0.05	1	0.095	strict_AP
ONT	95	pbfusion	7	21	0	438	0.05	1	0.095	strict_AP
ONT	95	pbfusion	9	20	0	439	0.04	1	0.077	strict_AP
ONT	95	pbfusion	11	18	0	441	0.04	1	0.077	strict_AP
ONT	95	pbfusion	16	17	0	442	0.04	1	0.077	strict_AP
ONT	95	pbfusion	17	15	0	444	0.03	1	0.058	strict_AP
ONT	95	pbfusion	19	13	0	446	0.03	1	0.058	strict_AP
ONT	95	pbfusion	21	12	0	447	0.03	1	0.058	strict_AP
ONT	95	pbfusion	24	11	0	448	0.02	1	0.039	strict_AP
ONT	95	pbfusion	30	10	0	449	0.02	1	0.039	strict_AP
ONT	95	pbfusion	34	9	0	450	0.02	1	0.039	strict_AP
ONT	95	pbfusion	39	8	0	451	0.02	1	0.039	strict_AP
ONT	95	pbfusion	40	6	0	453	0.01	1	0.02	strict_AP
ONT	95	pbfusion	45	5	0	454	0.01	1	0.02	strict_AP
ONT	95	pbfusion	46	4	0	455	0.01	1	0.02	strict_AP
ONT	95	pbfusion	51	3	0	456	0.01	1	0.02	strict_AP
ONT	95	pbfusion	53	2	0	457	0	1	0	strict_AP
ONT	95	ctat-LR-fusion	1	438	0	21	0.95	1	0.974	strict_AP
ONT	95	ctat-LR-fusion	2	376	0	83	0.82	1	0.901	strict_AP
ONT	95	ctat-LR-fusion	3	333	0	126	0.73	1	0.844	strict_AP
ONT	95	ctat-LR-fusion	4	303	0	156	0.66	1	0.795	strict_AP
ONT	95	ctat-LR-fusion	5	295	0	164	0.64	1	0.78	strict_AP
ONT	95	ctat-LR-fusion	6	289	0	170	0.63	1	0.773	strict_AP
ONT	95	ctat-LR-fusion	7	280	0	179	0.61	1	0.758	strict_AP
ONT	95	ctat-LR-fusion	8	269	0	190	0.59	1	0.742	strict_AP
ONT	95	ctat-LR-fusion	9	253	0	206	0.55	1	0.71	strict_AP
ONT	95	ctat-LR-fusion	10	237	0	222	0.52	1	0.684	strict_AP
ONT	95	ctat-LR-fusion	11	227	0	232	0.49	1	0.658	strict_AP
ONT	95	ctat-LR-fusion	12	218	0	241	0.47	1	0.639	strict_AP
ONT	95	ctat-LR-fusion	13	210	0	249	0.46	1	0.63	strict_AP
ONT	95	ctat-LR-fusion	14	208	0	251	0.45	1	0.621	strict_AP
ONT	95	ctat-LR-fusion	15	200	0	259	0.44	1	0.611	strict_AP
ONT	95	ctat-LR-fusion	19	197	0	262	0.43	1	0.601	strict_AP
ONT	95	ctat-LR-fusion	20	195	0	264	0.42	1	0.592	strict_AP
ONT	95	ctat-LR-fusion	21	194	0	265	0.42	1	0.592	strict_AP
ONT	95	ctat-LR-fusion	23	193	0	266	0.42	1	0.592	strict_AP
ONT	95	ctat-LR-fusion	24	192	0	267	0.42	1	0.592	strict_AP
ONT	95	ctat-LR-fusion	26	191	0	268	0.42	1	0.592	strict_AP
ONT	95	ctat-LR-fusion	32	190	0	269	0.41	1	0.582	strict_AP
ONT	95	ctat-LR-fusion	36	189	0	270	0.41	1	0.582	strict_AP
ONT	95	ctat-LR-fusion	37	188	0	271	0.41	1	0.582	strict_AP
ONT	95	ctat-LR-fusion	38	187	0	272	0.41	1	0.582	strict_AP
ONT	95	ctat-LR-fusion	39	186	0	273	0.41	1	0.582	strict_AP
ONT	95	ctat-LR-fusion	41	184	0	275	0.4	1	0.571	strict_AP
ONT	95	ctat-LR-fusion	42	183	0	276	0.4	1	0.571	strict_AP
ONT	95	ctat-LR-fusion	43	181	0	278	0.39	1	0.561	strict_AP
ONT	95	ctat-LR-fusion	44	174	0	285	0.38	1	0.551	strict_AP
ONT	95	ctat-LR-fusion	45	169	0	290	0.37	1	0.54	strict_AP
ONT	95	ctat-LR-fusion	46	166	0	293	0.36	1	0.529	strict_AP
ONT	95	ctat-LR-fusion	47	154	0	305	0.34	1	0.507	strict_AP
ONT	95	ctat-LR-fusion	48	151	0	308	0.33	1	0.496	strict_AP
ONT	95	ctat-LR-fusion	49	146	0	313	0.32	1	0.485	strict_AP
ONT	95	ctat-LR-fusion	50	139	0	320	0.3	1	0.462	strict_AP
ONT	95	ctat-LR-fusion	51	137	0	322	0.3	1	0.462	strict_AP
ONT	95	ctat-LR-fusion	52	132	0	327	0.29	1	0.45	strict_AP
ONT	95	ctat-LR-fusion	53	126	0	333	0.27	1	0.425	strict_AP
ONT	95	ctat-LR-fusion	54	123	0	336	0.27	1	0.425	strict_AP
ONT	95	ctat-LR-fusion	55	119	0	340	0.26	1	0.413	strict_AP
ONT	95	ctat-LR-fusion	56	118	0	341	0.26	1	0.413	strict_AP
ONT	95	ctat-LR-fusion	57	115	0	344	0.25	1	0.4	strict_AP
ONT	95	ctat-LR-fusion	58	110	0	349	0.24	1	0.387	strict_AP
ONT	95	ctat-LR-fusion	60	105	0	354	0.23	1	0.374	strict_AP
ONT	95	ctat-LR-fusion	61	104	0	355	0.23	1	0.374	strict_AP
ONT	95	ctat-LR-fusion	62	103	0	356	0.22	1	0.361	strict_AP
ONT	95	ctat-LR-fusion	63	99	0	360	0.22	1	0.361	strict_AP
ONT	95	ctat-LR-fusion	68	98	0	361	0.21	1	0.347	strict_AP
ONT	95	ctat-LR-fusion	70	97	0	362	0.21	1	0.347	strict_AP
ONT	95	ctat-LR-fusion	72	95	0	364	0.21	1	0.347	strict_AP
ONT	95	ctat-LR-fusion	74	94	0	365	0.2	1	0.333	strict_AP
ONT	95	ctat-LR-fusion	76	92	0	367	0.2	1	0.333	strict_AP
ONT	95	ctat-LR-fusion	77	91	0	368	0.2	1	0.333	strict_AP
ONT	95	ctat-LR-fusion	82	90	0	369	0.2	1	0.333	strict_AP
ONT	95	ctat-LR-fusion	84	88	0	371	0.19	1	0.319	strict_AP
ONT	95	ctat-LR-fusion	85	85	0	374	0.19	1	0.319	strict_AP
ONT	95	ctat-LR-fusion	86	84	0	375	0.18	1	0.305	strict_AP
ONT	95	ctat-LR-fusion	87	81	0	378	0.18	1	0.305	strict_AP
ONT	95	ctat-LR-fusion	88	80	0	379	0.17	1	0.291	strict_AP
ONT	95	ctat-LR-fusion	89	75	0	384	0.16	1	0.276	strict_AP
ONT	95	ctat-LR-fusion	90	73	0	386	0.16	1	0.276	strict_AP
ONT	95	ctat-LR-fusion	91	71	0	388	0.15	1	0.261	strict_AP
ONT	95	ctat-LR-fusion	92	65	0	394	0.14	1	0.246	strict_AP
ONT	95	ctat-LR-fusion	93	62	0	397	0.14	1	0.246	strict_AP
ONT	95	ctat-LR-fusion	94	60	0	399	0.13	1	0.23	strict_AP
ONT	95	ctat-LR-fusion	95	55	0	404	0.12	1	0.214	strict_AP
ONT	95	ctat-LR-fusion	96	53	0	406	0.12	1	0.214	strict_AP
ONT	95	ctat-LR-fusion	97	50	0	409	0.11	1	0.198	strict_AP
ONT	95	ctat-LR-fusion	98	48	0	411	0.1	1	0.182	strict_AP
ONT	95	ctat-LR-fusion	99	45	0	414	0.1	1	0.182	strict_AP
ONT	95	ctat-LR-fusion	100	43	0	416	0.09	1	0.165	strict_AP
ONT	95	ctat-LR-fusion	101	41	0	418	0.09	1	0.165	strict_AP
ONT	95	ctat-LR-fusion	102	37	0	422	0.08	1	0.148	strict_AP
ONT	95	ctat-LR-fusion	103	31	0	428	0.07	1	0.131	strict_AP
ONT	95	ctat-LR-fusion	105	30	0	429	0.07	1	0.131	strict_AP
ONT	95	ctat-LR-fusion	106	27	0	432	0.06	1	0.113	strict_AP
ONT	95	ctat-LR-fusion	107	23	0	436	0.05	1	0.095	strict_AP
ONT	95	ctat-LR-fusion	108	21	0	438	0.05	1	0.095	strict_AP
ONT	95	ctat-LR-fusion	109	20	0	439	0.04	1	0.077	strict_AP
ONT	95	ctat-LR-fusion	110	17	0	442	0.04	1	0.077	strict_AP
ONT	95	ctat-LR-fusion	111	16	0	443	0.03	1	0.058	strict_AP
ONT	95	ctat-LR-fusion	112	10	0	449	0.02	1	0.039	strict_AP
ONT	95	ctat-LR-fusion	113	8	0	451	0.02	1	0.039	strict_AP
ONT	95	ctat-LR-fusion	116	7	0	452	0.02	1	0.039	strict_AP
ONT	95	ctat-LR-fusion	118	6	0	453	0.01	1	0.02	strict_AP
ONT	95	ctat-LR-fusion	120	4	0	455	0.01	1	0.02	strict_AP
ONT	95	ctat-LR-fusion	121	2	0	457	0	1	0	strict_AP
ONT	95	ctat-LR-fusion	130	1	0	458	0	1	0	strict_AP
ONT	95	fusionseeker	1	234	228	225	0.51	0.51	0.51	strict_AP
ONT	95	fusionseeker	2	196	185	263	0.43	0.51	0.467	strict_AP
ONT	95	fusionseeker	3	172	164	287	0.37	0.51	0.429	strict_AP
ONT	95	fusionseeker	4	160	147	299	0.35	0.52	0.418	strict_AP
ONT	95	fusionseeker	5	152	142	307	0.33	0.52	0.404	strict_AP
ONT	95	fusionseeker	6	148	137	311	0.32	0.52	0.396	strict_AP
ONT	95	fusionseeker	7	145	134	314	0.32	0.52	0.396	strict_AP
ONT	95	fusionseeker	8	140	127	319	0.31	0.52	0.388	strict_AP
ONT	95	fusionseeker	9	131	124	328	0.29	0.51	0.37	strict_AP
ONT	95	fusionseeker	10	121	115	338	0.26	0.51	0.344	strict_AP
ONT	95	fusionseeker	11	116	111	343	0.25	0.51	0.336	strict_AP
ONT	95	fusionseeker	12	112	107	347	0.24	0.51	0.326	strict_AP
ONT	95	fusionseeker	13	108	100	351	0.24	0.52	0.328	strict_AP
ONT	95	fusionseeker	14	106	99	353	0.23	0.52	0.319	strict_AP
ONT	95	fusionseeker	15	101	98	358	0.22	0.51	0.307	strict_AP
ONT	95	fusionseeker	16	100	97	359	0.22	0.51	0.307	strict_AP
ONT	95	fusionseeker	17	99	97	360	0.22	0.51	0.307	strict_AP
ONT	95	fusionseeker	18	98	97	361	0.21	0.5	0.296	strict_AP
ONT	95	fusionseeker	19	97	96	362	0.21	0.5	0.296	strict_AP
ONT	95	fusionseeker	20	96	96	363	0.21	0.5	0.296	strict_AP
ONT	95	fusionseeker	21	95	95	364	0.21	0.5	0.296	strict_AP
ONT	95	fusionseeker	23	95	94	364	0.21	0.5	0.296	strict_AP
ONT	95	fusionseeker	24	95	93	364	0.21	0.51	0.297	strict_AP
ONT	95	fusionseeker	30	94	93	365	0.2	0.5	0.286	strict_AP
ONT	95	fusionseeker	32	93	93	366	0.2	0.5	0.286	strict_AP
ONT	95	fusionseeker	33	92	92	367	0.2	0.5	0.286	strict_AP
ONT	95	fusionseeker	36	92	91	367	0.2	0.5	0.286	strict_AP
ONT	95	fusionseeker	37	90	91	369	0.2	0.5	0.286	strict_AP
ONT	95	fusionseeker	38	89	90	370	0.19	0.5	0.275	strict_AP
ONT	95	fusionseeker	39	87	90	372	0.19	0.49	0.274	strict_AP
ONT	95	fusionseeker	40	85	89	374	0.19	0.49	0.274	strict_AP
ONT	95	fusionseeker	41	84	87	375	0.18	0.49	0.263	strict_AP
ONT	95	fusionseeker	42	82	85	377	0.18	0.49	0.263	strict_AP
ONT	95	fusionseeker	43	80	83	379	0.17	0.49	0.252	strict_AP
ONT	95	fusionseeker	44	80	79	379	0.17	0.5	0.254	strict_AP
ONT	95	fusionseeker	45	79	75	380	0.17	0.51	0.255	strict_AP
ONT	95	fusionseeker	46	78	73	381	0.17	0.52	0.256	strict_AP
ONT	95	fusionseeker	47	74	70	385	0.16	0.51	0.244	strict_AP
ONT	95	fusionseeker	48	74	68	385	0.16	0.52	0.245	strict_AP
ONT	95	fusionseeker	49	72	65	387	0.16	0.53	0.246	strict_AP
ONT	95	fusionseeker	50	70	62	389	0.15	0.53	0.234	strict_AP
ONT	95	fusionseeker	51	65	60	394	0.14	0.52	0.221	strict_AP
ONT	95	fusionseeker	52	63	60	396	0.14	0.51	0.22	strict_AP
ONT	95	fusionseeker	53	62	56	397	0.14	0.53	0.221	strict_AP
ONT	95	fusionseeker	54	61	56	398	0.13	0.52	0.208	strict_AP
ONT	95	fusionseeker	55	58	54	401	0.13	0.52	0.208	strict_AP
ONT	95	fusionseeker	56	58	52	401	0.13	0.53	0.209	strict_AP
ONT	95	fusionseeker	57	56	48	403	0.12	0.54	0.196	strict_AP
ONT	95	fusionseeker	58	54	43	405	0.12	0.56	0.198	strict_AP
ONT	95	fusionseeker	60	53	43	406	0.12	0.55	0.197	strict_AP
ONT	95	fusionseeker	61	52	43	407	0.11	0.55	0.183	strict_AP
ONT	95	fusionseeker	62	51	42	408	0.11	0.55	0.183	strict_AP
ONT	95	fusionseeker	63	51	41	408	0.11	0.55	0.183	strict_AP
ONT	95	fusionseeker	64	49	40	410	0.11	0.55	0.183	strict_AP
ONT	95	fusionseeker	69	48	40	411	0.1	0.55	0.169	strict_AP
ONT	95	fusionseeker	70	48	39	411	0.1	0.55	0.169	strict_AP
ONT	95	fusionseeker	71	48	38	411	0.1	0.56	0.17	strict_AP
ONT	95	fusionseeker	77	47	38	412	0.1	0.55	0.169	strict_AP
ONT	95	fusionseeker	79	46	38	413	0.1	0.55	0.169	strict_AP
ONT	95	fusionseeker	80	46	37	413	0.1	0.55	0.169	strict_AP
ONT	95	fusionseeker	82	45	37	414	0.1	0.55	0.169	strict_AP
ONT	95	fusionseeker	83	44	37	415	0.1	0.54	0.169	strict_AP
ONT	95	fusionseeker	84	43	34	416	0.09	0.56	0.155	strict_AP
ONT	95	fusionseeker	85	43	33	416	0.09	0.57	0.155	strict_AP
ONT	95	fusionseeker	86	42	32	417	0.09	0.57	0.155	strict_AP
ONT	95	fusionseeker	87	40	32	419	0.09	0.56	0.155	strict_AP
ONT	95	fusionseeker	88	38	30	421	0.08	0.56	0.14	strict_AP
ONT	95	fusionseeker	89	35	30	424	0.08	0.54	0.139	strict_AP
ONT	95	fusionseeker	90	34	28	425	0.07	0.55	0.124	strict_AP
ONT	95	fusionseeker	91	33	23	426	0.07	0.59	0.125	strict_AP
ONT	95	fusionseeker	92	32	21	427	0.07	0.6	0.125	strict_AP
ONT	95	fusionseeker	93	31	19	428	0.07	0.62	0.126	strict_AP
ONT	95	fusionseeker	94	29	18	430	0.06	0.62	0.109	strict_AP
ONT	95	fusionseeker	95	26	18	433	0.06	0.59	0.109	strict_AP
ONT	95	fusionseeker	96	25	17	434	0.05	0.6	0.092	strict_AP
ONT	95	fusionseeker	97	25	16	434	0.05	0.61	0.092	strict_AP
ONT	95	fusionseeker	98	25	15	434	0.05	0.62	0.093	strict_AP
ONT	95	fusionseeker	99	25	13	434	0.05	0.66	0.093	strict_AP
ONT	95	fusionseeker	100	24	13	435	0.05	0.65	0.093	strict_AP
ONT	95	fusionseeker	101	21	13	438	0.05	0.62	0.093	strict_AP
ONT	95	fusionseeker	102	20	11	439	0.04	0.65	0.075	strict_AP
ONT	95	fusionseeker	103	17	9	442	0.04	0.65	0.075	strict_AP
ONT	95	fusionseeker	104	16	9	443	0.03	0.64	0.057	strict_AP
ONT	95	fusionseeker	105	14	6	445	0.03	0.7	0.058	strict_AP
ONT	95	fusionseeker	107	11	5	448	0.02	0.69	0.039	strict_AP
ONT	95	fusionseeker	108	10	5	449	0.02	0.67	0.039	strict_AP
ONT	95	fusionseeker	110	8	5	451	0.02	0.62	0.039	strict_AP
ONT	95	fusionseeker	111	7	4	452	0.02	0.64	0.039	strict_AP
ONT	95	fusionseeker	112	6	3	453	0.01	0.67	0.02	strict_AP
ONT	95	fusionseeker	113	5	3	454	0.01	0.62	0.02	strict_AP
ONT	95	fusionseeker	114	5	2	454	0.01	0.71	0.02	strict_AP
ONT	95	fusionseeker	116	4	2	455	0.01	0.67	0.02	strict_AP
ONT	95	fusionseeker	119	4	1	455	0.01	0.8	0.02	strict_AP
ONT	95	fusionseeker	130	2	0	457	0	1	0	strict_AP
ONT	95	fusionseeker	170	1	0	458	0	1	0	strict_AP
ONT	95	LongGF	1	219	218	240	0.48	0.5	0.49	strict_AP
ONT	95	LongGF	2	180	193	279	0.39	0.48	0.43	strict_AP
ONT	95	LongGF	3	161	168	298	0.35	0.49	0.408	strict_AP
ONT	95	LongGF	4	144	154	315	0.31	0.48	0.377	strict_AP
ONT	95	LongGF	5	139	149	320	0.3	0.48	0.369	strict_AP
ONT	95	LongGF	6	134	145	325	0.29	0.48	0.362	strict_AP
ONT	95	LongGF	7	132	140	327	0.29	0.49	0.364	strict_AP
ONT	95	LongGF	8	123	137	336	0.27	0.47	0.343	strict_AP
ONT	95	LongGF	9	118	127	341	0.26	0.48	0.337	strict_AP
ONT	95	LongGF	10	110	120	349	0.24	0.48	0.32	strict_AP
ONT	95	LongGF	11	107	113	352	0.23	0.49	0.313	strict_AP
ONT	95	LongGF	12	107	108	352	0.23	0.5	0.315	strict_AP
ONT	95	LongGF	13	102	102	357	0.22	0.5	0.306	strict_AP
ONT	95	LongGF	14	101	100	358	0.22	0.5	0.306	strict_AP
ONT	95	LongGF	15	97	98	362	0.21	0.5	0.296	strict_AP
ONT	95	LongGF	17	94	98	365	0.2	0.49	0.284	strict_AP
ONT	95	LongGF	18	94	97	365	0.2	0.49	0.284	strict_AP
ONT	95	LongGF	20	93	96	366	0.2	0.49	0.284	strict_AP
ONT	95	LongGF	21	91	96	368	0.2	0.49	0.284	strict_AP
ONT	95	LongGF	22	91	95	368	0.2	0.49	0.284	strict_AP
ONT	95	LongGF	23	90	95	369	0.2	0.49	0.284	strict_AP
ONT	95	LongGF	24	89	95	370	0.19	0.48	0.272	strict_AP
ONT	95	LongGF	25	88	95	371	0.19	0.48	0.272	strict_AP
ONT	95	LongGF	26	86	94	373	0.19	0.48	0.272	strict_AP
ONT	95	LongGF	32	85	94	374	0.19	0.47	0.271	strict_AP
ONT	95	LongGF	33	84	94	375	0.18	0.47	0.26	strict_AP
ONT	95	LongGF	35	84	93	375	0.18	0.47	0.26	strict_AP
ONT	95	LongGF	36	84	92	375	0.18	0.48	0.262	strict_AP
ONT	95	LongGF	37	83	91	376	0.18	0.48	0.262	strict_AP
ONT	95	LongGF	38	81	90	378	0.18	0.47	0.26	strict_AP
ONT	95	LongGF	39	80	89	379	0.17	0.47	0.25	strict_AP
ONT	95	LongGF	40	80	86	379	0.17	0.48	0.251	strict_AP
ONT	95	LongGF	41	80	83	379	0.17	0.49	0.252	strict_AP
ONT	95	LongGF	42	80	82	379	0.17	0.49	0.252	strict_AP
ONT	95	LongGF	43	79	79	380	0.17	0.5	0.254	strict_AP
ONT	95	LongGF	44	76	76	383	0.17	0.5	0.254	strict_AP
ONT	95	LongGF	45	73	75	386	0.16	0.49	0.241	strict_AP
ONT	95	LongGF	46	72	71	387	0.16	0.5	0.242	strict_AP
ONT	95	LongGF	47	67	70	392	0.15	0.49	0.23	strict_AP
ONT	95	LongGF	48	67	69	392	0.15	0.49	0.23	strict_AP
ONT	95	LongGF	49	65	66	394	0.14	0.5	0.219	strict_AP
ONT	95	LongGF	50	61	66	398	0.13	0.48	0.205	strict_AP
ONT	95	LongGF	51	58	63	401	0.13	0.48	0.205	strict_AP
ONT	95	LongGF	52	54	62	405	0.12	0.47	0.191	strict_AP
ONT	95	LongGF	53	52	61	407	0.11	0.46	0.178	strict_AP
ONT	95	LongGF	54	51	59	408	0.11	0.46	0.178	strict_AP
ONT	95	LongGF	55	49	58	410	0.11	0.46	0.178	strict_AP
ONT	95	LongGF	56	47	57	412	0.1	0.45	0.164	strict_AP
ONT	95	LongGF	57	43	55	416	0.09	0.44	0.149	strict_AP
ONT	95	LongGF	58	40	52	419	0.09	0.43	0.149	strict_AP
ONT	95	LongGF	61	39	52	420	0.08	0.43	0.135	strict_AP
ONT	95	LongGF	62	36	52	423	0.08	0.41	0.134	strict_AP
ONT	95	LongGF	63	35	51	424	0.08	0.41	0.134	strict_AP
ONT	95	LongGF	66	34	51	425	0.07	0.4	0.119	strict_AP
ONT	95	LongGF	68	34	50	425	0.07	0.4	0.119	strict_AP
ONT	95	LongGF	69	34	49	425	0.07	0.41	0.12	strict_AP
ONT	95	LongGF	79	33	49	426	0.07	0.4	0.119	strict_AP
ONT	95	LongGF	80	33	48	426	0.07	0.41	0.12	strict_AP
ONT	95	LongGF	81	32	48	427	0.07	0.4	0.119	strict_AP
ONT	95	LongGF	82	32	47	427	0.07	0.41	0.12	strict_AP
ONT	95	LongGF	83	32	46	427	0.07	0.41	0.12	strict_AP
ONT	95	LongGF	84	29	46	430	0.06	0.39	0.104	strict_AP
ONT	95	LongGF	85	29	44	430	0.06	0.4	0.104	strict_AP
ONT	95	LongGF	86	27	42	432	0.06	0.39	0.104	strict_AP
ONT	95	LongGF	87	26	40	433	0.06	0.39	0.104	strict_AP
ONT	95	LongGF	88	25	38	434	0.05	0.4	0.089	strict_AP
ONT	95	LongGF	89	24	38	435	0.05	0.39	0.089	strict_AP
ONT	95	LongGF	90	21	38	438	0.05	0.36	0.088	strict_AP
ONT	95	LongGF	91	21	33	438	0.05	0.39	0.089	strict_AP
ONT	95	LongGF	92	19	31	440	0.04	0.38	0.072	strict_AP
ONT	95	LongGF	93	17	30	442	0.04	0.36	0.072	strict_AP
ONT	95	LongGF	94	15	30	444	0.03	0.33	0.055	strict_AP
ONT	95	LongGF	95	14	28	445	0.03	0.33	0.055	strict_AP
ONT	95	LongGF	96	14	27	445	0.03	0.34	0.055	strict_AP
ONT	95	LongGF	97	14	26	445	0.03	0.35	0.055	strict_AP
ONT	95	LongGF	98	13	26	446	0.03	0.33	0.055	strict_AP
ONT	95	LongGF	99	13	24	446	0.03	0.35	0.055	strict_AP
ONT	95	LongGF	100	12	22	447	0.03	0.35	0.055	strict_AP
ONT	95	LongGF	101	11	22	448	0.02	0.33	0.038	strict_AP
ONT	95	LongGF	102	10	19	449	0.02	0.34	0.038	strict_AP
ONT	95	LongGF	103	8	15	451	0.02	0.35	0.038	strict_AP
ONT	95	LongGF	104	8	14	451	0.02	0.36	0.038	strict_AP
ONT	95	LongGF	105	5	14	454	0.01	0.26	0.019	strict_AP
ONT	95	LongGF	106	4	12	455	0.01	0.25	0.019	strict_AP
ONT	95	LongGF	107	3	11	456	0.01	0.21	0.019	strict_AP
ONT	95	LongGF	108	3	10	456	0.01	0.23	0.019	strict_AP
ONT	95	LongGF	109	2	10	457	0	0.17	0	strict_AP
ONT	95	LongGF	110	2	8	457	0	0.2	0	strict_AP
ONT	95	LongGF	111	2	7	457	0	0.22	0	strict_AP
ONT	95	LongGF	112	1	5	458	0	0.17	0	strict_AP
ONT	95	LongGF	114	0	5	459	0	0	NA	strict_AP
ONT	95	LongGF	115	0	4	459	0	0	NA	strict_AP
ONT	95	LongGF	119	0	3	459	0	0	NA	strict_AP
ONT	95	LongGF	129	0	1	459	0	0	NA	strict_AP
Pac	85	pbfusion	1	278	1	172	0.62	1	0.765	strict_AP
Pac	85	pbfusion	2	214	1	236	0.48	1	0.649	strict_AP
Pac	85	pbfusion	3	185	1	265	0.41	0.99	0.58	strict_AP
Pac	85	pbfusion	4	167	1	283	0.37	0.99	0.539	strict_AP
Pac	85	pbfusion	5	153	1	297	0.34	0.99	0.506	strict_AP
Pac	85	pbfusion	6	141	1	309	0.31	0.99	0.472	strict_AP
Pac	85	pbfusion	7	130	1	320	0.29	0.99	0.449	strict_AP
Pac	85	pbfusion	8	118	1	332	0.26	0.99	0.412	strict_AP
Pac	85	pbfusion	9	107	1	343	0.24	0.99	0.386	strict_AP
Pac	85	pbfusion	10	101	1	349	0.22	0.99	0.36	strict_AP
Pac	85	pbfusion	11	94	1	356	0.21	0.99	0.347	strict_AP
Pac	85	pbfusion	12	90	1	360	0.2	0.99	0.333	strict_AP
Pac	85	pbfusion	13	81	0	369	0.18	1	0.305	strict_AP
Pac	85	pbfusion	14	74	0	376	0.16	1	0.276	strict_AP
Pac	85	pbfusion	15	71	0	379	0.16	1	0.276	strict_AP
Pac	85	pbfusion	16	62	0	388	0.14	1	0.246	strict_AP
Pac	85	pbfusion	17	55	0	395	0.12	1	0.214	strict_AP
Pac	85	pbfusion	18	49	0	401	0.11	1	0.198	strict_AP
Pac	85	pbfusion	19	46	0	404	0.1	1	0.182	strict_AP
Pac	85	pbfusion	20	39	0	411	0.09	1	0.165	strict_AP
Pac	85	pbfusion	21	38	0	412	0.08	1	0.148	strict_AP
Pac	85	pbfusion	22	37	0	413	0.08	1	0.148	strict_AP
Pac	85	pbfusion	23	34	0	416	0.08	1	0.148	strict_AP
Pac	85	pbfusion	24	32	0	418	0.07	1	0.131	strict_AP
Pac	85	pbfusion	25	31	0	419	0.07	1	0.131	strict_AP
Pac	85	pbfusion	26	30	0	420	0.07	1	0.131	strict_AP
Pac	85	pbfusion	27	28	0	422	0.06	1	0.113	strict_AP
Pac	85	pbfusion	28	24	0	426	0.05	1	0.095	strict_AP
Pac	85	pbfusion	29	22	0	428	0.05	1	0.095	strict_AP
Pac	85	pbfusion	30	19	0	431	0.04	1	0.077	strict_AP
Pac	85	pbfusion	31	18	0	432	0.04	1	0.077	strict_AP
Pac	85	pbfusion	32	16	0	434	0.04	1	0.077	strict_AP
Pac	85	pbfusion	34	14	0	436	0.03	1	0.058	strict_AP
Pac	85	pbfusion	35	13	0	437	0.03	1	0.058	strict_AP
Pac	85	pbfusion	37	11	0	439	0.02	1	0.039	strict_AP
Pac	85	pbfusion	38	10	0	440	0.02	1	0.039	strict_AP
Pac	85	pbfusion	40	8	0	442	0.02	1	0.039	strict_AP
Pac	85	pbfusion	42	6	0	444	0.01	1	0.02	strict_AP
Pac	85	pbfusion	47	5	0	445	0.01	1	0.02	strict_AP
Pac	85	pbfusion	49	4	0	446	0.01	1	0.02	strict_AP
Pac	85	pbfusion	53	3	0	447	0.01	1	0.02	strict_AP
Pac	85	pbfusion	59	1	0	449	0	1	0	strict_AP
Pac	85	fusionseeker	1	195	222	255	0.43	0.47	0.449	strict_AP
Pac	85	fusionseeker	2	167	176	283	0.37	0.49	0.422	strict_AP
Pac	85	fusionseeker	3	144	155	306	0.32	0.48	0.384	strict_AP
Pac	85	fusionseeker	4	128	145	322	0.28	0.47	0.351	strict_AP
Pac	85	fusionseeker	5	125	134	325	0.28	0.48	0.354	strict_AP
Pac	85	fusionseeker	6	123	128	327	0.27	0.49	0.348	strict_AP
Pac	85	fusionseeker	7	113	119	337	0.25	0.49	0.331	strict_AP
Pac	85	fusionseeker	8	107	115	343	0.24	0.48	0.32	strict_AP
Pac	85	fusionseeker	9	99	109	351	0.22	0.48	0.302	strict_AP
Pac	85	fusionseeker	10	94	103	356	0.21	0.48	0.292	strict_AP
Pac	85	fusionseeker	11	92	98	358	0.2	0.48	0.282	strict_AP
Pac	85	fusionseeker	12	90	97	360	0.2	0.48	0.282	strict_AP
Pac	85	fusionseeker	13	90	96	360	0.2	0.48	0.282	strict_AP
Pac	85	fusionseeker	14	87	96	363	0.19	0.48	0.272	strict_AP
Pac	85	fusionseeker	16	84	95	366	0.19	0.47	0.271	strict_AP
Pac	85	fusionseeker	17	82	95	368	0.18	0.46	0.259	strict_AP
Pac	85	fusionseeker	18	80	95	370	0.18	0.46	0.259	strict_AP
Pac	85	fusionseeker	19	80	94	370	0.18	0.46	0.259	strict_AP
Pac	85	fusionseeker	20	79	92	371	0.18	0.46	0.259	strict_AP
Pac	85	fusionseeker	21	78	91	372	0.17	0.46	0.248	strict_AP
Pac	85	fusionseeker	22	77	90	373	0.17	0.46	0.248	strict_AP
Pac	85	fusionseeker	23	73	87	377	0.16	0.46	0.237	strict_AP
Pac	85	fusionseeker	24	71	85	379	0.16	0.46	0.237	strict_AP
Pac	85	fusionseeker	25	71	83	379	0.16	0.46	0.237	strict_AP
Pac	85	fusionseeker	26	68	81	382	0.15	0.46	0.226	strict_AP
Pac	85	fusionseeker	27	68	80	382	0.15	0.46	0.226	strict_AP
Pac	85	fusionseeker	28	66	78	384	0.15	0.46	0.226	strict_AP
Pac	85	fusionseeker	29	65	78	385	0.14	0.45	0.214	strict_AP
Pac	85	fusionseeker	30	64	76	386	0.14	0.46	0.215	strict_AP
Pac	85	fusionseeker	31	63	73	387	0.14	0.46	0.215	strict_AP
Pac	85	fusionseeker	32	60	71	390	0.13	0.46	0.203	strict_AP
Pac	85	fusionseeker	34	59	69	391	0.13	0.46	0.203	strict_AP
Pac	85	fusionseeker	35	55	69	395	0.12	0.44	0.189	strict_AP
Pac	85	fusionseeker	36	55	66	395	0.12	0.45	0.189	strict_AP
Pac	85	fusionseeker	37	53	65	397	0.12	0.45	0.189	strict_AP
Pac	85	fusionseeker	38	51	63	399	0.11	0.45	0.177	strict_AP
Pac	85	fusionseeker	40	50	62	400	0.11	0.45	0.177	strict_AP
Pac	85	fusionseeker	41	49	61	401	0.11	0.45	0.177	strict_AP
Pac	85	fusionseeker	42	47	56	403	0.1	0.46	0.164	strict_AP
Pac	85	fusionseeker	43	44	54	406	0.1	0.45	0.164	strict_AP
Pac	85	fusionseeker	44	42	53	408	0.09	0.44	0.149	strict_AP
Pac	85	fusionseeker	45	41	52	409	0.09	0.44	0.149	strict_AP
Pac	85	fusionseeker	46	40	49	410	0.09	0.45	0.15	strict_AP
Pac	85	fusionseeker	47	39	47	411	0.09	0.45	0.15	strict_AP
Pac	85	fusionseeker	48	39	42	411	0.09	0.48	0.152	strict_AP
Pac	85	fusionseeker	49	38	40	412	0.08	0.49	0.138	strict_AP
Pac	85	fusionseeker	50	38	38	412	0.08	0.5	0.138	strict_AP
Pac	85	fusionseeker	51	36	38	414	0.08	0.49	0.138	strict_AP
Pac	85	fusionseeker	52	36	37	414	0.08	0.49	0.138	strict_AP
Pac	85	fusionseeker	54	36	34	414	0.08	0.51	0.138	strict_AP
Pac	85	fusionseeker	55	35	34	415	0.08	0.51	0.138	strict_AP
Pac	85	fusionseeker	56	35	33	415	0.08	0.51	0.138	strict_AP
Pac	85	fusionseeker	57	35	32	415	0.08	0.52	0.139	strict_AP
Pac	85	fusionseeker	58	35	29	415	0.08	0.55	0.14	strict_AP
Pac	85	fusionseeker	59	34	29	416	0.08	0.54	0.139	strict_AP
Pac	85	fusionseeker	60	33	28	417	0.07	0.54	0.124	strict_AP
Pac	85	fusionseeker	61	32	27	418	0.07	0.54	0.124	strict_AP
Pac	85	fusionseeker	62	31	26	419	0.07	0.54	0.124	strict_AP
Pac	85	fusionseeker	63	30	24	420	0.07	0.56	0.124	strict_AP
Pac	85	fusionseeker	65	29	23	421	0.06	0.56	0.108	strict_AP
Pac	85	fusionseeker	67	28	22	422	0.06	0.56	0.108	strict_AP
Pac	85	fusionseeker	68	25	21	425	0.06	0.54	0.108	strict_AP
Pac	85	fusionseeker	69	25	20	425	0.06	0.56	0.108	strict_AP
Pac	85	fusionseeker	70	24	20	426	0.05	0.55	0.092	strict_AP
Pac	85	fusionseeker	71	23	20	427	0.05	0.53	0.091	strict_AP
Pac	85	fusionseeker	72	23	19	427	0.05	0.55	0.092	strict_AP
Pac	85	fusionseeker	73	22	18	428	0.05	0.55	0.092	strict_AP
Pac	85	fusionseeker	74	21	17	429	0.05	0.55	0.092	strict_AP
Pac	85	fusionseeker	75	21	15	429	0.05	0.58	0.092	strict_AP
Pac	85	fusionseeker	79	21	14	429	0.05	0.6	0.092	strict_AP
Pac	85	fusionseeker	81	21	12	429	0.05	0.64	0.093	strict_AP
Pac	85	fusionseeker	82	19	12	431	0.04	0.61	0.075	strict_AP
Pac	85	fusionseeker	83	18	12	432	0.04	0.6	0.075	strict_AP
Pac	85	fusionseeker	84	18	10	432	0.04	0.64	0.075	strict_AP
Pac	85	fusionseeker	85	17	9	433	0.04	0.65	0.075	strict_AP
Pac	85	fusionseeker	86	15	8	435	0.03	0.65	0.057	strict_AP
Pac	85	fusionseeker	88	13	7	437	0.03	0.65	0.057	strict_AP
Pac	85	fusionseeker	89	13	6	437	0.03	0.68	0.057	strict_AP
Pac	85	fusionseeker	90	12	5	438	0.03	0.71	0.058	strict_AP
Pac	85	fusionseeker	92	10	5	440	0.02	0.67	0.039	strict_AP
Pac	85	fusionseeker	93	8	4	442	0.02	0.67	0.039	strict_AP
Pac	85	fusionseeker	94	7	4	443	0.02	0.64	0.039	strict_AP
Pac	85	fusionseeker	95	7	3	443	0.02	0.7	0.039	strict_AP
Pac	85	fusionseeker	97	6	2	444	0.01	0.75	0.02	strict_AP
Pac	85	fusionseeker	98	4	2	446	0.01	0.67	0.02	strict_AP
Pac	85	fusionseeker	101	4	1	446	0.01	0.8	0.02	strict_AP
Pac	85	fusionseeker	105	2	1	448	0	0.67	0	strict_AP
Pac	85	fusionseeker	109	2	0	448	0	1	0	strict_AP
Pac	85	fusionseeker	116	1	0	449	0	1	0	strict_AP
Pac	85	LongGF	1	194	193	256	0.43	0.5	0.462	strict_AP
Pac	85	LongGF	2	174	149	276	0.39	0.54	0.453	strict_AP
Pac	85	LongGF	3	148	137	302	0.33	0.52	0.404	strict_AP
Pac	85	LongGF	4	137	125	313	0.3	0.52	0.38	strict_AP
Pac	85	LongGF	5	129	120	321	0.29	0.52	0.372	strict_AP
Pac	85	LongGF	6	122	114	328	0.27	0.52	0.355	strict_AP
Pac	85	LongGF	7	112	107	338	0.25	0.51	0.336	strict_AP
Pac	85	LongGF	8	108	102	342	0.24	0.51	0.326	strict_AP
Pac	85	LongGF	9	99	101	351	0.22	0.49	0.304	strict_AP
Pac	85	LongGF	10	92	95	358	0.2	0.49	0.284	strict_AP
Pac	85	LongGF	11	87	91	363	0.19	0.49	0.274	strict_AP
Pac	85	LongGF	12	85	86	365	0.19	0.5	0.275	strict_AP
Pac	85	LongGF	13	82	85	368	0.18	0.49	0.263	strict_AP
Pac	85	LongGF	14	82	81	368	0.18	0.5	0.265	strict_AP
Pac	85	LongGF	15	81	81	369	0.18	0.5	0.265	strict_AP
Pac	85	LongGF	16	80	80	370	0.18	0.5	0.265	strict_AP
Pac	85	LongGF	17	78	79	372	0.17	0.5	0.254	strict_AP
Pac	85	LongGF	18	77	77	373	0.17	0.5	0.254	strict_AP
Pac	85	LongGF	19	74	75	376	0.16	0.5	0.242	strict_AP
Pac	85	LongGF	21	74	73	376	0.16	0.5	0.242	strict_AP
Pac	85	LongGF	22	74	72	376	0.16	0.51	0.244	strict_AP
Pac	85	LongGF	23	72	71	378	0.16	0.5	0.242	strict_AP
Pac	85	LongGF	24	72	66	378	0.16	0.52	0.245	strict_AP
Pac	85	LongGF	25	70	62	380	0.16	0.53	0.246	strict_AP
Pac	85	LongGF	26	66	61	384	0.15	0.52	0.233	strict_AP
Pac	85	LongGF	27	64	60	386	0.14	0.52	0.221	strict_AP
Pac	85	LongGF	28	63	58	387	0.14	0.52	0.221	strict_AP
Pac	85	LongGF	29	62	56	388	0.14	0.53	0.221	strict_AP
Pac	85	LongGF	30	60	56	390	0.13	0.52	0.208	strict_AP
Pac	85	LongGF	31	58	55	392	0.13	0.51	0.207	strict_AP
Pac	85	LongGF	32	57	54	393	0.13	0.51	0.207	strict_AP
Pac	85	LongGF	33	54	52	396	0.12	0.51	0.194	strict_AP
Pac	85	LongGF	34	52	49	398	0.12	0.51	0.194	strict_AP
Pac	85	LongGF	35	51	47	399	0.11	0.52	0.182	strict_AP
Pac	85	LongGF	36	50	45	400	0.11	0.53	0.182	strict_AP
Pac	85	LongGF	37	49	44	401	0.11	0.53	0.182	strict_AP
Pac	85	LongGF	38	46	44	404	0.1	0.51	0.167	strict_AP
Pac	85	LongGF	39	42	43	408	0.09	0.49	0.152	strict_AP
Pac	85	LongGF	40	41	41	409	0.09	0.5	0.153	strict_AP
Pac	85	LongGF	41	39	41	411	0.09	0.49	0.152	strict_AP
Pac	85	LongGF	42	35	41	415	0.08	0.46	0.136	strict_AP
Pac	85	LongGF	43	35	38	415	0.08	0.48	0.137	strict_AP
Pac	85	LongGF	44	35	36	415	0.08	0.49	0.138	strict_AP
Pac	85	LongGF	45	35	35	415	0.08	0.5	0.138	strict_AP
Pac	85	LongGF	46	33	35	417	0.07	0.49	0.122	strict_AP
Pac	85	LongGF	47	33	34	417	0.07	0.49	0.122	strict_AP
Pac	85	LongGF	48	32	33	418	0.07	0.49	0.122	strict_AP
Pac	85	LongGF	49	30	33	420	0.07	0.48	0.122	strict_AP
Pac	85	LongGF	50	29	32	421	0.06	0.48	0.107	strict_AP
Pac	85	LongGF	51	28	30	422	0.06	0.48	0.107	strict_AP
Pac	85	LongGF	52	28	29	422	0.06	0.49	0.107	strict_AP
Pac	85	LongGF	53	27	27	423	0.06	0.5	0.107	strict_AP
Pac	85	LongGF	54	26	25	424	0.06	0.51	0.107	strict_AP
Pac	85	LongGF	56	26	24	424	0.06	0.52	0.108	strict_AP
Pac	85	LongGF	57	25	23	425	0.06	0.52	0.108	strict_AP
Pac	85	LongGF	58	24	20	426	0.05	0.55	0.092	strict_AP
Pac	85	LongGF	59	22	20	428	0.05	0.52	0.091	strict_AP
Pac	85	LongGF	60	21	20	429	0.05	0.51	0.091	strict_AP
Pac	85	LongGF	61	21	18	429	0.05	0.54	0.092	strict_AP
Pac	85	LongGF	63	20	17	430	0.04	0.54	0.074	strict_AP
Pac	85	LongGF	66	19	16	431	0.04	0.54	0.074	strict_AP
Pac	85	LongGF	67	18	16	432	0.04	0.53	0.074	strict_AP
Pac	85	LongGF	68	17	15	433	0.04	0.53	0.074	strict_AP
Pac	85	LongGF	69	14	13	436	0.03	0.52	0.057	strict_AP
Pac	85	LongGF	71	13	12	437	0.03	0.52	0.057	strict_AP
Pac	85	LongGF	74	13	11	437	0.03	0.54	0.057	strict_AP
Pac	85	LongGF	75	12	11	438	0.03	0.52	0.057	strict_AP
Pac	85	LongGF	76	11	10	439	0.02	0.52	0.039	strict_AP
Pac	85	LongGF	77	10	10	440	0.02	0.5	0.038	strict_AP
Pac	85	LongGF	80	8	10	442	0.02	0.44	0.038	strict_AP
Pac	85	LongGF	81	7	10	443	0.02	0.41	0.038	strict_AP
Pac	85	LongGF	82	6	10	444	0.01	0.38	0.019	strict_AP
Pac	85	LongGF	84	5	9	445	0.01	0.36	0.019	strict_AP
Pac	85	LongGF	89	3	8	447	0.01	0.27	0.019	strict_AP
Pac	85	LongGF	90	3	7	447	0.01	0.3	0.019	strict_AP
Pac	85	LongGF	91	3	6	447	0.01	0.33	0.019	strict_AP
Pac	85	LongGF	92	3	4	447	0.01	0.43	0.02	strict_AP
Pac	85	LongGF	97	3	3	447	0.01	0.5	0.02	strict_AP
Pac	85	LongGF	99	3	2	447	0.01	0.6	0.02	strict_AP
Pac	85	LongGF	102	1	2	449	0	0.33	0	strict_AP
Pac	85	LongGF	111	0	2	450	0	0	NA	strict_AP
Pac	85	LongGF	113	0	1	450	0	0	NA	strict_AP
Pac	85	JAFFAL	1	338	3	112	0.75	0.99	0.853	strict_AP
Pac	85	JAFFAL	2	298	3	152	0.66	0.99	0.792	strict_AP
Pac	85	JAFFAL	3	261	3	189	0.58	0.99	0.731	strict_AP
Pac	85	JAFFAL	4	243	2	207	0.54	0.99	0.699	strict_AP
Pac	85	JAFFAL	5	227	1	223	0.5	1	0.667	strict_AP
Pac	85	JAFFAL	6	209	1	241	0.46	1	0.63	strict_AP
Pac	85	JAFFAL	7	196	1	254	0.44	0.99	0.609	strict_AP
Pac	85	JAFFAL	8	189	1	261	0.42	0.99	0.59	strict_AP
Pac	85	JAFFAL	9	179	1	271	0.4	0.99	0.57	strict_AP
Pac	85	JAFFAL	10	171	1	279	0.38	0.99	0.549	strict_AP
Pac	85	JAFFAL	11	166	1	284	0.37	0.99	0.539	strict_AP
Pac	85	JAFFAL	12	159	1	291	0.35	0.99	0.517	strict_AP
Pac	85	JAFFAL	13	155	1	295	0.34	0.99	0.506	strict_AP
Pac	85	JAFFAL	14	148	1	302	0.33	0.99	0.495	strict_AP
Pac	85	JAFFAL	15	145	1	305	0.32	0.99	0.484	strict_AP
Pac	85	JAFFAL	16	140	1	310	0.31	0.99	0.472	strict_AP
Pac	85	JAFFAL	17	136	1	314	0.3	0.99	0.46	strict_AP
Pac	85	JAFFAL	18	135	1	315	0.3	0.99	0.46	strict_AP
Pac	85	JAFFAL	19	131	0	319	0.29	1	0.45	strict_AP
Pac	85	JAFFAL	20	125	0	325	0.28	1	0.438	strict_AP
Pac	85	JAFFAL	21	121	0	329	0.27	1	0.425	strict_AP
Pac	85	JAFFAL	22	116	0	334	0.26	1	0.413	strict_AP
Pac	85	JAFFAL	23	111	0	339	0.25	1	0.4	strict_AP
Pac	85	JAFFAL	24	107	0	343	0.24	1	0.387	strict_AP
Pac	85	JAFFAL	25	104	0	346	0.23	1	0.374	strict_AP
Pac	85	JAFFAL	26	100	0	350	0.22	1	0.361	strict_AP
Pac	85	JAFFAL	27	99	0	351	0.22	1	0.361	strict_AP
Pac	85	JAFFAL	28	94	0	356	0.21	1	0.347	strict_AP
Pac	85	JAFFAL	29	92	0	358	0.2	1	0.333	strict_AP
Pac	85	JAFFAL	31	90	0	360	0.2	1	0.333	strict_AP
Pac	85	JAFFAL	32	83	0	367	0.18	1	0.305	strict_AP
Pac	85	JAFFAL	33	82	0	368	0.18	1	0.305	strict_AP
Pac	85	JAFFAL	34	80	0	370	0.18	1	0.305	strict_AP
Pac	85	JAFFAL	35	78	0	372	0.17	1	0.291	strict_AP
Pac	85	JAFFAL	36	74	0	376	0.16	1	0.276	strict_AP
Pac	85	JAFFAL	37	69	0	381	0.15	1	0.261	strict_AP
Pac	85	JAFFAL	38	68	0	382	0.15	1	0.261	strict_AP
Pac	85	JAFFAL	39	63	0	387	0.14	1	0.246	strict_AP
Pac	85	JAFFAL	40	61	0	389	0.14	1	0.246	strict_AP
Pac	85	JAFFAL	41	57	0	393	0.13	1	0.23	strict_AP
Pac	85	JAFFAL	42	54	0	396	0.12	1	0.214	strict_AP
Pac	85	JAFFAL	43	52	0	398	0.12	1	0.214	strict_AP
Pac	85	JAFFAL	44	50	0	400	0.11	1	0.198	strict_AP
Pac	85	JAFFAL	45	49	0	401	0.11	1	0.198	strict_AP
Pac	85	JAFFAL	46	47	0	403	0.1	1	0.182	strict_AP
Pac	85	JAFFAL	49	43	0	407	0.1	1	0.182	strict_AP
Pac	85	JAFFAL	50	41	0	409	0.09	1	0.165	strict_AP
Pac	85	JAFFAL	51	37	0	413	0.08	1	0.148	strict_AP
Pac	85	JAFFAL	54	36	0	414	0.08	1	0.148	strict_AP
Pac	85	JAFFAL	55	34	0	416	0.08	1	0.148	strict_AP
Pac	85	JAFFAL	56	32	0	418	0.07	1	0.131	strict_AP
Pac	85	JAFFAL	59	31	0	419	0.07	1	0.131	strict_AP
Pac	85	JAFFAL	61	30	0	420	0.07	1	0.131	strict_AP
Pac	85	JAFFAL	62	29	0	421	0.06	1	0.113	strict_AP
Pac	85	JAFFAL	63	28	0	422	0.06	1	0.113	strict_AP
Pac	85	JAFFAL	64	27	0	423	0.06	1	0.113	strict_AP
Pac	85	JAFFAL	65	26	0	424	0.06	1	0.113	strict_AP
Pac	85	JAFFAL	66	25	0	425	0.06	1	0.113	strict_AP
Pac	85	JAFFAL	68	22	0	428	0.05	1	0.095	strict_AP
Pac	85	JAFFAL	69	21	0	429	0.05	1	0.095	strict_AP
Pac	85	JAFFAL	70	18	0	432	0.04	1	0.077	strict_AP
Pac	85	JAFFAL	71	17	0	433	0.04	1	0.077	strict_AP
Pac	85	JAFFAL	72	15	0	435	0.03	1	0.058	strict_AP
Pac	85	JAFFAL	73	12	0	438	0.03	1	0.058	strict_AP
Pac	85	JAFFAL	77	11	0	439	0.02	1	0.039	strict_AP
Pac	85	JAFFAL	78	9	0	441	0.02	1	0.039	strict_AP
Pac	85	JAFFAL	79	8	0	442	0.02	1	0.039	strict_AP
Pac	85	JAFFAL	83	7	0	443	0.02	1	0.039	strict_AP
Pac	85	JAFFAL	84	6	0	444	0.01	1	0.02	strict_AP
Pac	85	JAFFAL	90	4	0	446	0.01	1	0.02	strict_AP
Pac	85	JAFFAL	91	3	0	447	0.01	1	0.02	strict_AP
Pac	85	JAFFAL	94	2	0	448	0	1	0	strict_AP
Pac	85	JAFFAL	104	1	0	449	0	1	0	strict_AP
Pac	85	ctat-LR-fusion	1	372	1	78	0.83	1	0.907	strict_AP
Pac	85	ctat-LR-fusion	2	317	0	133	0.7	1	0.824	strict_AP
Pac	85	ctat-LR-fusion	3	280	0	170	0.62	1	0.765	strict_AP
Pac	85	ctat-LR-fusion	4	256	0	194	0.57	1	0.726	strict_AP
Pac	85	ctat-LR-fusion	5	240	0	210	0.53	1	0.693	strict_AP
Pac	85	ctat-LR-fusion	6	230	0	220	0.51	1	0.675	strict_AP
Pac	85	ctat-LR-fusion	7	217	0	233	0.48	1	0.649	strict_AP
Pac	85	ctat-LR-fusion	8	210	0	240	0.47	1	0.639	strict_AP
Pac	85	ctat-LR-fusion	9	199	0	251	0.44	1	0.611	strict_AP
Pac	85	ctat-LR-fusion	10	187	0	263	0.42	1	0.592	strict_AP
Pac	85	ctat-LR-fusion	11	182	0	268	0.4	1	0.571	strict_AP
Pac	85	ctat-LR-fusion	12	179	0	271	0.4	1	0.571	strict_AP
Pac	85	ctat-LR-fusion	13	175	0	275	0.39	1	0.561	strict_AP
Pac	85	ctat-LR-fusion	14	169	0	281	0.38	1	0.551	strict_AP
Pac	85	ctat-LR-fusion	15	166	0	284	0.37	1	0.54	strict_AP
Pac	85	ctat-LR-fusion	16	160	0	290	0.36	1	0.529	strict_AP
Pac	85	ctat-LR-fusion	17	158	0	292	0.35	1	0.519	strict_AP
Pac	85	ctat-LR-fusion	19	156	0	294	0.35	1	0.519	strict_AP
Pac	85	ctat-LR-fusion	20	155	0	295	0.34	1	0.507	strict_AP
Pac	85	ctat-LR-fusion	21	154	0	296	0.34	1	0.507	strict_AP
Pac	85	ctat-LR-fusion	22	152	0	298	0.34	1	0.507	strict_AP
Pac	85	ctat-LR-fusion	23	149	0	301	0.33	1	0.496	strict_AP
Pac	85	ctat-LR-fusion	24	145	0	305	0.32	1	0.485	strict_AP
Pac	85	ctat-LR-fusion	25	141	0	309	0.31	1	0.473	strict_AP
Pac	85	ctat-LR-fusion	26	138	0	312	0.31	1	0.473	strict_AP
Pac	85	ctat-LR-fusion	27	137	0	313	0.3	1	0.462	strict_AP
Pac	85	ctat-LR-fusion	28	135	0	315	0.3	1	0.462	strict_AP
Pac	85	ctat-LR-fusion	29	134	0	316	0.3	1	0.462	strict_AP
Pac	85	ctat-LR-fusion	30	129	0	321	0.29	1	0.45	strict_AP
Pac	85	ctat-LR-fusion	31	127	0	323	0.28	1	0.438	strict_AP
Pac	85	ctat-LR-fusion	32	125	0	325	0.28	1	0.438	strict_AP
Pac	85	ctat-LR-fusion	33	119	0	331	0.26	1	0.413	strict_AP
Pac	85	ctat-LR-fusion	34	117	0	333	0.26	1	0.413	strict_AP
Pac	85	ctat-LR-fusion	35	116	0	334	0.26	1	0.413	strict_AP
Pac	85	ctat-LR-fusion	36	110	0	340	0.24	1	0.387	strict_AP
Pac	85	ctat-LR-fusion	37	107	0	343	0.24	1	0.387	strict_AP
Pac	85	ctat-LR-fusion	38	103	0	347	0.23	1	0.374	strict_AP
Pac	85	ctat-LR-fusion	39	101	0	349	0.22	1	0.361	strict_AP
Pac	85	ctat-LR-fusion	40	97	0	353	0.22	1	0.361	strict_AP
Pac	85	ctat-LR-fusion	41	95	0	355	0.21	1	0.347	strict_AP
Pac	85	ctat-LR-fusion	42	92	0	358	0.2	1	0.333	strict_AP
Pac	85	ctat-LR-fusion	43	87	0	363	0.19	1	0.319	strict_AP
Pac	85	ctat-LR-fusion	44	84	0	366	0.19	1	0.319	strict_AP
Pac	85	ctat-LR-fusion	45	80	0	370	0.18	1	0.305	strict_AP
Pac	85	ctat-LR-fusion	46	76	0	374	0.17	1	0.291	strict_AP
Pac	85	ctat-LR-fusion	47	73	0	377	0.16	1	0.276	strict_AP
Pac	85	ctat-LR-fusion	49	72	0	378	0.16	1	0.276	strict_AP
Pac	85	ctat-LR-fusion	50	68	0	382	0.15	1	0.261	strict_AP
Pac	85	ctat-LR-fusion	51	67	0	383	0.15	1	0.261	strict_AP
Pac	85	ctat-LR-fusion	52	65	0	385	0.14	1	0.246	strict_AP
Pac	85	ctat-LR-fusion	53	63	0	387	0.14	1	0.246	strict_AP
Pac	85	ctat-LR-fusion	54	62	0	388	0.14	1	0.246	strict_AP
Pac	85	ctat-LR-fusion	57	60	0	390	0.13	1	0.23	strict_AP
Pac	85	ctat-LR-fusion	58	59	0	391	0.13	1	0.23	strict_AP
Pac	85	ctat-LR-fusion	59	58	0	392	0.13	1	0.23	strict_AP
Pac	85	ctat-LR-fusion	61	56	0	394	0.12	1	0.214	strict_AP
Pac	85	ctat-LR-fusion	62	54	0	396	0.12	1	0.214	strict_AP
Pac	85	ctat-LR-fusion	63	51	0	399	0.11	1	0.198	strict_AP
Pac	85	ctat-LR-fusion	64	49	0	401	0.11	1	0.198	strict_AP
Pac	85	ctat-LR-fusion	65	47	0	403	0.1	1	0.182	strict_AP
Pac	85	ctat-LR-fusion	66	46	0	404	0.1	1	0.182	strict_AP
Pac	85	ctat-LR-fusion	69	45	0	405	0.1	1	0.182	strict_AP
Pac	85	ctat-LR-fusion	71	44	0	406	0.1	1	0.182	strict_AP
Pac	85	ctat-LR-fusion	72	43	0	407	0.1	1	0.182	strict_AP
Pac	85	ctat-LR-fusion	73	41	0	409	0.09	1	0.165	strict_AP
Pac	85	ctat-LR-fusion	74	39	0	411	0.09	1	0.165	strict_AP
Pac	85	ctat-LR-fusion	75	36	0	414	0.08	1	0.148	strict_AP
Pac	85	ctat-LR-fusion	76	34	0	416	0.08	1	0.148	strict_AP
Pac	85	ctat-LR-fusion	77	33	0	417	0.07	1	0.131	strict_AP
Pac	85	ctat-LR-fusion	80	32	0	418	0.07	1	0.131	strict_AP
Pac	85	ctat-LR-fusion	81	30	0	420	0.07	1	0.131	strict_AP
Pac	85	ctat-LR-fusion	82	26	0	424	0.06	1	0.113	strict_AP
Pac	85	ctat-LR-fusion	83	25	0	425	0.06	1	0.113	strict_AP
Pac	85	ctat-LR-fusion	84	24	0	426	0.05	1	0.095	strict_AP
Pac	85	ctat-LR-fusion	85	22	0	428	0.05	1	0.095	strict_AP
Pac	85	ctat-LR-fusion	86	19	0	431	0.04	1	0.077	strict_AP
Pac	85	ctat-LR-fusion	87	18	0	432	0.04	1	0.077	strict_AP
Pac	85	ctat-LR-fusion	88	17	0	433	0.04	1	0.077	strict_AP
Pac	85	ctat-LR-fusion	90	14	0	436	0.03	1	0.058	strict_AP
Pac	85	ctat-LR-fusion	91	11	0	439	0.02	1	0.039	strict_AP
Pac	85	ctat-LR-fusion	92	10	0	440	0.02	1	0.039	strict_AP
Pac	85	ctat-LR-fusion	93	8	0	442	0.02	1	0.039	strict_AP
Pac	85	ctat-LR-fusion	94	7	0	443	0.02	1	0.039	strict_AP
Pac	85	ctat-LR-fusion	95	5	0	445	0.01	1	0.02	strict_AP
Pac	85	ctat-LR-fusion	99	4	0	446	0.01	1	0.02	strict_AP
Pac	85	ctat-LR-fusion	110	2	0	448	0	1	0	strict_AP
Pac	85	ctat-LR-fusion	112	1	0	449	0	1	0	strict_AP
Pac	90	ctat-LR-fusion	1	420	1	34	0.93	1	0.964	strict_AP
Pac	90	ctat-LR-fusion	2	366	0	88	0.81	1	0.895	strict_AP
Pac	90	ctat-LR-fusion	3	317	0	137	0.7	1	0.824	strict_AP
Pac	90	ctat-LR-fusion	4	297	0	157	0.65	1	0.788	strict_AP
Pac	90	ctat-LR-fusion	5	285	0	169	0.63	1	0.773	strict_AP
Pac	90	ctat-LR-fusion	6	274	0	180	0.6	1	0.75	strict_AP
Pac	90	ctat-LR-fusion	7	257	0	197	0.57	1	0.726	strict_AP
Pac	90	ctat-LR-fusion	8	243	0	211	0.54	1	0.701	strict_AP
Pac	90	ctat-LR-fusion	9	227	0	227	0.5	1	0.667	strict_AP
Pac	90	ctat-LR-fusion	10	220	0	234	0.48	1	0.649	strict_AP
Pac	90	ctat-LR-fusion	11	209	0	245	0.46	1	0.63	strict_AP
Pac	90	ctat-LR-fusion	12	204	0	250	0.45	1	0.621	strict_AP
Pac	90	ctat-LR-fusion	13	200	0	254	0.44	1	0.611	strict_AP
Pac	90	ctat-LR-fusion	14	196	0	258	0.43	1	0.601	strict_AP
Pac	90	ctat-LR-fusion	15	194	0	260	0.43	1	0.601	strict_AP
Pac	90	ctat-LR-fusion	16	192	0	262	0.42	1	0.592	strict_AP
Pac	90	ctat-LR-fusion	17	189	0	265	0.42	1	0.592	strict_AP
Pac	90	ctat-LR-fusion	19	188	0	266	0.41	1	0.582	strict_AP
Pac	90	ctat-LR-fusion	22	185	0	269	0.41	1	0.582	strict_AP
Pac	90	ctat-LR-fusion	23	180	0	274	0.4	1	0.571	strict_AP
Pac	90	ctat-LR-fusion	26	179	0	275	0.39	1	0.561	strict_AP
Pac	90	ctat-LR-fusion	28	178	0	276	0.39	1	0.561	strict_AP
Pac	90	ctat-LR-fusion	29	175	0	279	0.39	1	0.561	strict_AP
Pac	90	ctat-LR-fusion	30	174	0	280	0.38	1	0.551	strict_AP
Pac	90	ctat-LR-fusion	31	172	0	282	0.38	1	0.551	strict_AP
Pac	90	ctat-LR-fusion	32	168	0	286	0.37	1	0.54	strict_AP
Pac	90	ctat-LR-fusion	33	167	0	287	0.37	1	0.54	strict_AP
Pac	90	ctat-LR-fusion	34	165	0	289	0.36	1	0.529	strict_AP
Pac	90	ctat-LR-fusion	35	162	0	292	0.36	1	0.529	strict_AP
Pac	90	ctat-LR-fusion	36	160	0	294	0.35	1	0.519	strict_AP
Pac	90	ctat-LR-fusion	37	157	0	297	0.35	1	0.519	strict_AP
Pac	90	ctat-LR-fusion	38	155	0	299	0.34	1	0.507	strict_AP
Pac	90	ctat-LR-fusion	39	152	0	302	0.33	1	0.496	strict_AP
Pac	90	ctat-LR-fusion	40	147	0	307	0.32	1	0.485	strict_AP
Pac	90	ctat-LR-fusion	41	144	0	310	0.32	1	0.485	strict_AP
Pac	90	ctat-LR-fusion	42	141	0	313	0.31	1	0.473	strict_AP
Pac	90	ctat-LR-fusion	43	139	0	315	0.31	1	0.473	strict_AP
Pac	90	ctat-LR-fusion	44	136	0	318	0.3	1	0.462	strict_AP
Pac	90	ctat-LR-fusion	45	129	0	325	0.28	1	0.438	strict_AP
Pac	90	ctat-LR-fusion	46	122	0	332	0.27	1	0.425	strict_AP
Pac	90	ctat-LR-fusion	47	120	0	334	0.26	1	0.413	strict_AP
Pac	90	ctat-LR-fusion	48	116	0	338	0.26	1	0.413	strict_AP
Pac	90	ctat-LR-fusion	49	111	0	343	0.24	1	0.387	strict_AP
Pac	90	ctat-LR-fusion	50	105	0	349	0.23	1	0.374	strict_AP
Pac	90	ctat-LR-fusion	51	103	0	351	0.23	1	0.374	strict_AP
Pac	90	ctat-LR-fusion	52	100	0	354	0.22	1	0.361	strict_AP
Pac	90	ctat-LR-fusion	54	98	0	356	0.22	1	0.361	strict_AP
Pac	90	ctat-LR-fusion	55	96	0	358	0.21	1	0.347	strict_AP
Pac	90	ctat-LR-fusion	56	91	0	363	0.2	1	0.333	strict_AP
Pac	90	ctat-LR-fusion	57	88	0	366	0.19	1	0.319	strict_AP
Pac	90	ctat-LR-fusion	58	85	0	369	0.19	1	0.319	strict_AP
Pac	90	ctat-LR-fusion	59	83	0	371	0.18	1	0.305	strict_AP
Pac	90	ctat-LR-fusion	60	81	0	373	0.18	1	0.305	strict_AP
Pac	90	ctat-LR-fusion	61	79	0	375	0.17	1	0.291	strict_AP
Pac	90	ctat-LR-fusion	63	78	0	376	0.17	1	0.291	strict_AP
Pac	90	ctat-LR-fusion	65	74	0	380	0.16	1	0.276	strict_AP
Pac	90	ctat-LR-fusion	69	71	0	383	0.16	1	0.276	strict_AP
Pac	90	ctat-LR-fusion	70	70	0	384	0.15	1	0.261	strict_AP
Pac	90	ctat-LR-fusion	71	69	0	385	0.15	1	0.261	strict_AP
Pac	90	ctat-LR-fusion	72	68	0	386	0.15	1	0.261	strict_AP
Pac	90	ctat-LR-fusion	74	66	0	388	0.15	1	0.261	strict_AP
Pac	90	ctat-LR-fusion	75	63	0	391	0.14	1	0.246	strict_AP
Pac	90	ctat-LR-fusion	76	61	0	393	0.13	1	0.23	strict_AP
Pac	90	ctat-LR-fusion	77	60	0	394	0.13	1	0.23	strict_AP
Pac	90	ctat-LR-fusion	79	56	0	398	0.12	1	0.214	strict_AP
Pac	90	ctat-LR-fusion	80	55	0	399	0.12	1	0.214	strict_AP
Pac	90	ctat-LR-fusion	81	51	0	403	0.11	1	0.198	strict_AP
Pac	90	ctat-LR-fusion	83	48	0	406	0.11	1	0.198	strict_AP
Pac	90	ctat-LR-fusion	84	47	0	407	0.1	1	0.182	strict_AP
Pac	90	ctat-LR-fusion	86	44	0	410	0.1	1	0.182	strict_AP
Pac	90	ctat-LR-fusion	87	40	0	414	0.09	1	0.165	strict_AP
Pac	90	ctat-LR-fusion	88	36	0	418	0.08	1	0.148	strict_AP
Pac	90	ctat-LR-fusion	89	33	0	421	0.07	1	0.131	strict_AP
Pac	90	ctat-LR-fusion	90	31	0	423	0.07	1	0.131	strict_AP
Pac	90	ctat-LR-fusion	91	26	0	428	0.06	1	0.113	strict_AP
Pac	90	ctat-LR-fusion	92	25	0	429	0.06	1	0.113	strict_AP
Pac	90	ctat-LR-fusion	93	20	0	434	0.04	1	0.077	strict_AP
Pac	90	ctat-LR-fusion	94	18	0	436	0.04	1	0.077	strict_AP
Pac	90	ctat-LR-fusion	95	17	0	437	0.04	1	0.077	strict_AP
Pac	90	ctat-LR-fusion	96	15	0	439	0.03	1	0.058	strict_AP
Pac	90	ctat-LR-fusion	98	14	0	440	0.03	1	0.058	strict_AP
Pac	90	ctat-LR-fusion	99	13	0	441	0.03	1	0.058	strict_AP
Pac	90	ctat-LR-fusion	100	12	0	442	0.03	1	0.058	strict_AP
Pac	90	ctat-LR-fusion	101	11	0	443	0.02	1	0.039	strict_AP
Pac	90	ctat-LR-fusion	102	10	0	444	0.02	1	0.039	strict_AP
Pac	90	ctat-LR-fusion	103	9	0	445	0.02	1	0.039	strict_AP
Pac	90	ctat-LR-fusion	104	7	0	447	0.02	1	0.039	strict_AP
Pac	90	ctat-LR-fusion	105	6	0	448	0.01	1	0.02	strict_AP
Pac	90	ctat-LR-fusion	106	4	0	450	0.01	1	0.02	strict_AP
Pac	90	ctat-LR-fusion	109	3	0	451	0.01	1	0.02	strict_AP
Pac	90	ctat-LR-fusion	110	2	0	452	0	1	0	strict_AP
Pac	90	ctat-LR-fusion	125	1	0	453	0	1	0	strict_AP
Pac	90	LongGF	1	205	217	249	0.45	0.49	0.469	strict_AP
Pac	90	LongGF	2	180	187	274	0.4	0.49	0.44	strict_AP
Pac	90	LongGF	3	155	160	299	0.34	0.49	0.401	strict_AP
Pac	90	LongGF	4	149	149	305	0.33	0.5	0.398	strict_AP
Pac	90	LongGF	5	142	140	312	0.31	0.5	0.383	strict_AP
Pac	90	LongGF	6	132	133	322	0.29	0.5	0.367	strict_AP
Pac	90	LongGF	7	125	126	329	0.28	0.5	0.359	strict_AP
Pac	90	LongGF	8	117	119	337	0.26	0.5	0.342	strict_AP
Pac	90	LongGF	9	112	117	342	0.25	0.49	0.331	strict_AP
Pac	90	LongGF	10	102	112	352	0.22	0.48	0.302	strict_AP
Pac	90	LongGF	11	97	110	357	0.21	0.47	0.29	strict_AP
Pac	90	LongGF	12	96	106	358	0.21	0.48	0.292	strict_AP
Pac	90	LongGF	13	94	104	360	0.21	0.47	0.29	strict_AP
Pac	90	LongGF	14	93	101	361	0.2	0.48	0.282	strict_AP
Pac	90	LongGF	16	92	97	362	0.2	0.49	0.284	strict_AP
Pac	90	LongGF	17	92	94	362	0.2	0.49	0.284	strict_AP
Pac	90	LongGF	19	90	94	364	0.2	0.49	0.284	strict_AP
Pac	90	LongGF	22	90	93	364	0.2	0.49	0.284	strict_AP
Pac	90	LongGF	23	90	92	364	0.2	0.49	0.284	strict_AP
Pac	90	LongGF	25	90	91	364	0.2	0.5	0.286	strict_AP
Pac	90	LongGF	26	88	90	366	0.19	0.49	0.274	strict_AP
Pac	90	LongGF	27	86	90	368	0.19	0.49	0.274	strict_AP
Pac	90	LongGF	28	86	88	368	0.19	0.49	0.274	strict_AP
Pac	90	LongGF	29	85	87	369	0.19	0.49	0.274	strict_AP
Pac	90	LongGF	30	85	86	369	0.19	0.5	0.275	strict_AP
Pac	90	LongGF	31	85	82	369	0.19	0.51	0.277	strict_AP
Pac	90	LongGF	32	84	80	370	0.19	0.51	0.277	strict_AP
Pac	90	LongGF	33	82	78	372	0.18	0.51	0.266	strict_AP
Pac	90	LongGF	34	80	75	374	0.18	0.52	0.267	strict_AP
Pac	90	LongGF	35	78	75	376	0.17	0.51	0.255	strict_AP
Pac	90	LongGF	36	75	72	379	0.17	0.51	0.255	strict_AP
Pac	90	LongGF	37	73	71	381	0.16	0.51	0.244	strict_AP
Pac	90	LongGF	38	71	69	383	0.16	0.51	0.244	strict_AP
Pac	90	LongGF	39	70	69	384	0.15	0.5	0.231	strict_AP
Pac	90	LongGF	40	69	68	385	0.15	0.5	0.231	strict_AP
Pac	90	LongGF	41	68	66	386	0.15	0.51	0.232	strict_AP
Pac	90	LongGF	42	67	65	387	0.15	0.51	0.232	strict_AP
Pac	90	LongGF	43	66	63	388	0.15	0.51	0.232	strict_AP
Pac	90	LongGF	44	64	61	390	0.14	0.51	0.22	strict_AP
Pac	90	LongGF	45	62	58	392	0.14	0.52	0.221	strict_AP
Pac	90	LongGF	46	61	58	393	0.13	0.51	0.207	strict_AP
Pac	90	LongGF	47	58	58	396	0.13	0.5	0.206	strict_AP
Pac	90	LongGF	49	58	54	396	0.13	0.52	0.208	strict_AP
Pac	90	LongGF	50	54	50	400	0.12	0.52	0.195	strict_AP
Pac	90	LongGF	51	53	49	401	0.12	0.52	0.195	strict_AP
Pac	90	LongGF	52	52	47	402	0.11	0.53	0.182	strict_AP
Pac	90	LongGF	53	49	44	405	0.11	0.53	0.182	strict_AP
Pac	90	LongGF	54	47	44	407	0.1	0.52	0.168	strict_AP
Pac	90	LongGF	55	46	42	408	0.1	0.52	0.168	strict_AP
Pac	90	LongGF	56	45	40	409	0.1	0.53	0.168	strict_AP
Pac	90	LongGF	57	42	39	412	0.09	0.52	0.153	strict_AP
Pac	90	LongGF	58	42	38	412	0.09	0.53	0.154	strict_AP
Pac	90	LongGF	59	42	37	412	0.09	0.53	0.154	strict_AP
Pac	90	LongGF	60	42	35	412	0.09	0.55	0.155	strict_AP
Pac	90	LongGF	62	41	35	413	0.09	0.54	0.154	strict_AP
Pac	90	LongGF	63	40	34	414	0.09	0.54	0.154	strict_AP
Pac	90	LongGF	64	39	34	415	0.09	0.53	0.154	strict_AP
Pac	90	LongGF	65	39	33	415	0.09	0.54	0.154	strict_AP
Pac	90	LongGF	66	38	31	416	0.08	0.55	0.14	strict_AP
Pac	90	LongGF	68	34	31	420	0.07	0.52	0.123	strict_AP
Pac	90	LongGF	69	33	30	421	0.07	0.52	0.123	strict_AP
Pac	90	LongGF	70	32	28	422	0.07	0.53	0.124	strict_AP
Pac	90	LongGF	71	32	27	422	0.07	0.54	0.124	strict_AP
Pac	90	LongGF	73	31	27	423	0.07	0.53	0.124	strict_AP
Pac	90	LongGF	75	30	25	424	0.07	0.55	0.124	strict_AP
Pac	90	LongGF	76	28	23	426	0.06	0.55	0.108	strict_AP
Pac	90	LongGF	77	27	22	427	0.06	0.55	0.108	strict_AP
Pac	90	LongGF	78	25	21	429	0.06	0.54	0.108	strict_AP
Pac	90	LongGF	79	24	20	430	0.05	0.55	0.092	strict_AP
Pac	90	LongGF	80	23	20	431	0.05	0.53	0.091	strict_AP
Pac	90	LongGF	81	22	18	432	0.05	0.55	0.092	strict_AP
Pac	90	LongGF	82	21	18	433	0.05	0.54	0.092	strict_AP
Pac	90	LongGF	84	20	18	434	0.04	0.53	0.074	strict_AP
Pac	90	LongGF	85	20	16	434	0.04	0.56	0.075	strict_AP
Pac	90	LongGF	86	16	16	438	0.04	0.5	0.074	strict_AP
Pac	90	LongGF	88	14	16	440	0.03	0.47	0.056	strict_AP
Pac	90	LongGF	89	12	16	442	0.03	0.43	0.056	strict_AP
Pac	90	LongGF	90	11	14	443	0.02	0.44	0.038	strict_AP
Pac	90	LongGF	91	9	12	445	0.02	0.43	0.038	strict_AP
Pac	90	LongGF	92	7	11	447	0.02	0.39	0.038	strict_AP
Pac	90	LongGF	93	7	8	447	0.02	0.47	0.038	strict_AP
Pac	90	LongGF	94	7	7	447	0.02	0.5	0.038	strict_AP
Pac	90	LongGF	95	5	6	449	0.01	0.45	0.02	strict_AP
Pac	90	LongGF	96	4	6	450	0.01	0.4	0.02	strict_AP
Pac	90	LongGF	97	3	6	451	0.01	0.33	0.019	strict_AP
Pac	90	LongGF	100	2	6	452	0	0.25	0	strict_AP
Pac	90	LongGF	101	2	5	452	0	0.29	0	strict_AP
Pac	90	LongGF	102	2	4	452	0	0.33	0	strict_AP
Pac	90	LongGF	103	1	3	453	0	0.25	0	strict_AP
Pac	90	LongGF	108	0	2	454	0	0	NA	strict_AP
Pac	90	LongGF	117	0	1	454	0	0	NA	strict_AP
Pac	90	JAFFAL	1	396	5	58	0.87	0.99	0.926	strict_AP
Pac	90	JAFFAL	2	353	5	101	0.78	0.99	0.873	strict_AP
Pac	90	JAFFAL	3	312	3	142	0.69	0.99	0.813	strict_AP
Pac	90	JAFFAL	4	290	3	164	0.64	0.99	0.777	strict_AP
Pac	90	JAFFAL	5	278	2	176	0.61	0.99	0.755	strict_AP
Pac	90	JAFFAL	6	261	2	193	0.57	0.99	0.723	strict_AP
Pac	90	JAFFAL	7	247	1	207	0.54	1	0.701	strict_AP
Pac	90	JAFFAL	8	232	0	222	0.51	1	0.675	strict_AP
Pac	90	JAFFAL	9	222	0	232	0.49	1	0.658	strict_AP
Pac	90	JAFFAL	10	208	0	246	0.46	1	0.63	strict_AP
Pac	90	JAFFAL	11	203	0	251	0.45	1	0.621	strict_AP
Pac	90	JAFFAL	12	197	0	257	0.43	1	0.601	strict_AP
Pac	90	JAFFAL	13	192	0	262	0.42	1	0.592	strict_AP
Pac	90	JAFFAL	14	188	0	266	0.41	1	0.582	strict_AP
Pac	90	JAFFAL	15	186	0	268	0.41	1	0.582	strict_AP
Pac	90	JAFFAL	17	185	0	269	0.41	1	0.582	strict_AP
Pac	90	JAFFAL	18	184	0	270	0.41	1	0.582	strict_AP
Pac	90	JAFFAL	20	183	0	271	0.4	1	0.571	strict_AP
Pac	90	JAFFAL	23	180	0	274	0.4	1	0.571	strict_AP
Pac	90	JAFFAL	24	178	0	276	0.39	1	0.561	strict_AP
Pac	90	JAFFAL	25	174	0	280	0.38	1	0.551	strict_AP
Pac	90	JAFFAL	26	173	0	281	0.38	1	0.551	strict_AP
Pac	90	JAFFAL	27	172	0	282	0.38	1	0.551	strict_AP
Pac	90	JAFFAL	28	168	0	286	0.37	1	0.54	strict_AP
Pac	90	JAFFAL	29	161	0	293	0.35	1	0.519	strict_AP
Pac	90	JAFFAL	30	156	0	298	0.34	1	0.507	strict_AP
Pac	90	JAFFAL	31	154	0	300	0.34	1	0.507	strict_AP
Pac	90	JAFFAL	32	152	0	302	0.33	1	0.496	strict_AP
Pac	90	JAFFAL	34	146	0	308	0.32	1	0.485	strict_AP
Pac	90	JAFFAL	35	141	0	313	0.31	1	0.473	strict_AP
Pac	90	JAFFAL	36	138	0	316	0.3	1	0.462	strict_AP
Pac	90	JAFFAL	37	133	0	321	0.29	1	0.45	strict_AP
Pac	90	JAFFAL	38	130	0	324	0.29	1	0.45	strict_AP
Pac	90	JAFFAL	39	128	0	326	0.28	1	0.438	strict_AP
Pac	90	JAFFAL	40	123	0	331	0.27	1	0.425	strict_AP
Pac	90	JAFFAL	41	117	0	337	0.26	1	0.413	strict_AP
Pac	90	JAFFAL	42	113	0	341	0.25	1	0.4	strict_AP
Pac	90	JAFFAL	43	108	0	346	0.24	1	0.387	strict_AP
Pac	90	JAFFAL	44	105	0	349	0.23	1	0.374	strict_AP
Pac	90	JAFFAL	45	103	0	351	0.23	1	0.374	strict_AP
Pac	90	JAFFAL	46	98	0	356	0.22	1	0.361	strict_AP
Pac	90	JAFFAL	47	93	0	361	0.2	1	0.333	strict_AP
Pac	90	JAFFAL	48	91	0	363	0.2	1	0.333	strict_AP
Pac	90	JAFFAL	49	90	0	364	0.2	1	0.333	strict_AP
Pac	90	JAFFAL	50	86	0	368	0.19	1	0.319	strict_AP
Pac	90	JAFFAL	51	81	0	373	0.18	1	0.305	strict_AP
Pac	90	JAFFAL	52	77	0	377	0.17	1	0.291	strict_AP
Pac	90	JAFFAL	53	75	0	379	0.17	1	0.291	strict_AP
Pac	90	JAFFAL	54	74	0	380	0.16	1	0.276	strict_AP
Pac	90	JAFFAL	55	72	0	382	0.16	1	0.276	strict_AP
Pac	90	JAFFAL	56	71	0	383	0.16	1	0.276	strict_AP
Pac	90	JAFFAL	57	68	0	386	0.15	1	0.261	strict_AP
Pac	90	JAFFAL	58	67	0	387	0.15	1	0.261	strict_AP
Pac	90	JAFFAL	60	66	0	388	0.15	1	0.261	strict_AP
Pac	90	JAFFAL	61	64	0	390	0.14	1	0.246	strict_AP
Pac	90	JAFFAL	62	62	0	392	0.14	1	0.246	strict_AP
Pac	90	JAFFAL	64	60	0	394	0.13	1	0.23	strict_AP
Pac	90	JAFFAL	65	57	0	397	0.13	1	0.23	strict_AP
Pac	90	JAFFAL	66	53	0	401	0.12	1	0.214	strict_AP
Pac	90	JAFFAL	67	50	0	404	0.11	1	0.198	strict_AP
Pac	90	JAFFAL	68	48	0	406	0.11	1	0.198	strict_AP
Pac	90	JAFFAL	69	47	0	407	0.1	1	0.182	strict_AP
Pac	90	JAFFAL	70	45	0	409	0.1	1	0.182	strict_AP
Pac	90	JAFFAL	71	43	0	411	0.09	1	0.165	strict_AP
Pac	90	JAFFAL	72	42	0	412	0.09	1	0.165	strict_AP
Pac	90	JAFFAL	74	41	0	413	0.09	1	0.165	strict_AP
Pac	90	JAFFAL	75	40	0	414	0.09	1	0.165	strict_AP
Pac	90	JAFFAL	76	37	0	417	0.08	1	0.148	strict_AP
Pac	90	JAFFAL	77	34	0	420	0.07	1	0.131	strict_AP
Pac	90	JAFFAL	78	33	0	421	0.07	1	0.131	strict_AP
Pac	90	JAFFAL	79	32	0	422	0.07	1	0.131	strict_AP
Pac	90	JAFFAL	80	31	0	423	0.07	1	0.131	strict_AP
Pac	90	JAFFAL	81	30	0	424	0.07	1	0.131	strict_AP
Pac	90	JAFFAL	82	27	0	427	0.06	1	0.113	strict_AP
Pac	90	JAFFAL	83	25	0	429	0.06	1	0.113	strict_AP
Pac	90	JAFFAL	84	23	0	431	0.05	1	0.095	strict_AP
Pac	90	JAFFAL	85	20	0	434	0.04	1	0.077	strict_AP
Pac	90	JAFFAL	87	18	0	436	0.04	1	0.077	strict_AP
Pac	90	JAFFAL	88	15	0	439	0.03	1	0.058	strict_AP
Pac	90	JAFFAL	90	14	0	440	0.03	1	0.058	strict_AP
Pac	90	JAFFAL	91	9	0	445	0.02	1	0.039	strict_AP
Pac	90	JAFFAL	92	6	0	448	0.01	1	0.02	strict_AP
Pac	90	JAFFAL	94	5	0	449	0.01	1	0.02	strict_AP
Pac	90	JAFFAL	96	3	0	451	0.01	1	0.02	strict_AP
Pac	90	JAFFAL	97	2	0	452	0	1	0	strict_AP
Pac	90	JAFFAL	108	1	0	453	0	1	0	strict_AP
Pac	90	pbfusion	1	363	2	91	0.8	0.99	0.885	strict_AP
Pac	90	pbfusion	2	285	0	169	0.63	1	0.773	strict_AP
Pac	90	pbfusion	3	251	0	203	0.55	1	0.71	strict_AP
Pac	90	pbfusion	4	225	0	229	0.5	1	0.667	strict_AP
Pac	90	pbfusion	5	210	0	244	0.46	1	0.63	strict_AP
Pac	90	pbfusion	6	194	0	260	0.43	1	0.601	strict_AP
Pac	90	pbfusion	7	185	0	269	0.41	1	0.582	strict_AP
Pac	90	pbfusion	8	177	0	277	0.39	1	0.561	strict_AP
Pac	90	pbfusion	9	171	0	283	0.38	1	0.551	strict_AP
Pac	90	pbfusion	10	167	0	287	0.37	1	0.54	strict_AP
Pac	90	pbfusion	11	162	0	292	0.36	1	0.529	strict_AP
Pac	90	pbfusion	12	159	0	295	0.35	1	0.519	strict_AP
Pac	90	pbfusion	13	152	0	302	0.33	1	0.496	strict_AP
Pac	90	pbfusion	14	147	0	307	0.32	1	0.485	strict_AP
Pac	90	pbfusion	15	145	0	309	0.32	1	0.485	strict_AP
Pac	90	pbfusion	16	132	0	322	0.29	1	0.45	strict_AP
Pac	90	pbfusion	17	126	0	328	0.28	1	0.438	strict_AP
Pac	90	pbfusion	18	123	0	331	0.27	1	0.425	strict_AP
Pac	90	pbfusion	19	116	0	338	0.26	1	0.413	strict_AP
Pac	90	pbfusion	20	109	0	345	0.24	1	0.387	strict_AP
Pac	90	pbfusion	21	103	0	351	0.23	1	0.374	strict_AP
Pac	90	pbfusion	22	97	0	357	0.21	1	0.347	strict_AP
Pac	90	pbfusion	23	92	0	362	0.2	1	0.333	strict_AP
Pac	90	pbfusion	24	84	0	370	0.19	1	0.319	strict_AP
Pac	90	pbfusion	25	79	0	375	0.17	1	0.291	strict_AP
Pac	90	pbfusion	26	76	0	378	0.17	1	0.291	strict_AP
Pac	90	pbfusion	27	68	0	386	0.15	1	0.261	strict_AP
Pac	90	pbfusion	28	62	0	392	0.14	1	0.246	strict_AP
Pac	90	pbfusion	29	60	0	394	0.13	1	0.23	strict_AP
Pac	90	pbfusion	30	56	0	398	0.12	1	0.214	strict_AP
Pac	90	pbfusion	31	55	0	399	0.12	1	0.214	strict_AP
Pac	90	pbfusion	32	49	0	405	0.11	1	0.198	strict_AP
Pac	90	pbfusion	33	45	0	409	0.1	1	0.182	strict_AP
Pac	90	pbfusion	34	42	0	412	0.09	1	0.165	strict_AP
Pac	90	pbfusion	35	38	0	416	0.08	1	0.148	strict_AP
Pac	90	pbfusion	36	33	0	421	0.07	1	0.131	strict_AP
Pac	90	pbfusion	37	28	0	426	0.06	1	0.113	strict_AP
Pac	90	pbfusion	38	25	0	429	0.06	1	0.113	strict_AP
Pac	90	pbfusion	39	22	0	432	0.05	1	0.095	strict_AP
Pac	90	pbfusion	40	19	0	435	0.04	1	0.077	strict_AP
Pac	90	pbfusion	41	17	0	437	0.04	1	0.077	strict_AP
Pac	90	pbfusion	42	15	0	439	0.03	1	0.058	strict_AP
Pac	90	pbfusion	43	14	0	440	0.03	1	0.058	strict_AP
Pac	90	pbfusion	44	13	0	441	0.03	1	0.058	strict_AP
Pac	90	pbfusion	45	12	0	442	0.03	1	0.058	strict_AP
Pac	90	pbfusion	46	11	0	443	0.02	1	0.039	strict_AP
Pac	90	pbfusion	47	9	0	445	0.02	1	0.039	strict_AP
Pac	90	pbfusion	48	7	0	447	0.02	1	0.039	strict_AP
Pac	90	pbfusion	49	6	0	448	0.01	1	0.02	strict_AP
Pac	90	pbfusion	51	5	0	449	0.01	1	0.02	strict_AP
Pac	90	pbfusion	52	4	0	450	0.01	1	0.02	strict_AP
Pac	90	pbfusion	54	3	0	451	0.01	1	0.02	strict_AP
Pac	90	fusionseeker	1	209	244	245	0.46	0.46	0.46	strict_AP
Pac	90	fusionseeker	2	177	205	277	0.39	0.46	0.422	strict_AP
Pac	90	fusionseeker	3	154	174	300	0.34	0.47	0.395	strict_AP
Pac	90	fusionseeker	4	145	164	309	0.32	0.47	0.381	strict_AP
Pac	90	fusionseeker	5	139	152	315	0.31	0.48	0.377	strict_AP
Pac	90	fusionseeker	6	131	147	323	0.29	0.47	0.359	strict_AP
Pac	90	fusionseeker	7	121	141	333	0.27	0.46	0.34	strict_AP
Pac	90	fusionseeker	8	116	128	338	0.26	0.48	0.337	strict_AP
Pac	90	fusionseeker	9	115	121	339	0.25	0.49	0.331	strict_AP
Pac	90	fusionseeker	10	109	117	345	0.24	0.48	0.32	strict_AP
Pac	90	fusionseeker	11	104	112	350	0.23	0.48	0.311	strict_AP
Pac	90	fusionseeker	12	100	110	354	0.22	0.48	0.302	strict_AP
Pac	90	fusionseeker	13	96	109	358	0.21	0.47	0.29	strict_AP
Pac	90	fusionseeker	14	94	107	360	0.21	0.47	0.29	strict_AP
Pac	90	fusionseeker	15	92	103	362	0.2	0.47	0.281	strict_AP
Pac	90	fusionseeker	16	91	103	363	0.2	0.47	0.281	strict_AP
Pac	90	fusionseeker	17	91	102	363	0.2	0.47	0.281	strict_AP
Pac	90	fusionseeker	22	90	100	364	0.2	0.47	0.281	strict_AP
Pac	90	fusionseeker	23	89	100	365	0.2	0.47	0.281	strict_AP
Pac	90	fusionseeker	24	88	100	366	0.19	0.47	0.271	strict_AP
Pac	90	fusionseeker	25	88	99	366	0.19	0.47	0.271	strict_AP
Pac	90	fusionseeker	26	88	96	366	0.19	0.48	0.272	strict_AP
Pac	90	fusionseeker	28	88	95	366	0.19	0.48	0.272	strict_AP
Pac	90	fusionseeker	30	87	95	367	0.19	0.48	0.272	strict_AP
Pac	90	fusionseeker	31	86	94	368	0.19	0.48	0.272	strict_AP
Pac	90	fusionseeker	32	86	93	368	0.19	0.48	0.272	strict_AP
Pac	90	fusionseeker	33	82	90	372	0.18	0.48	0.262	strict_AP
Pac	90	fusionseeker	34	79	87	375	0.17	0.48	0.251	strict_AP
Pac	90	fusionseeker	35	78	86	376	0.17	0.48	0.251	strict_AP
Pac	90	fusionseeker	36	77	85	377	0.17	0.48	0.251	strict_AP
Pac	90	fusionseeker	37	76	84	378	0.17	0.47	0.25	strict_AP
Pac	90	fusionseeker	38	74	78	380	0.16	0.49	0.241	strict_AP
Pac	90	fusionseeker	39	73	76	381	0.16	0.49	0.241	strict_AP
Pac	90	fusionseeker	40	73	73	381	0.16	0.5	0.242	strict_AP
Pac	90	fusionseeker	41	70	73	384	0.15	0.49	0.23	strict_AP
Pac	90	fusionseeker	42	69	71	385	0.15	0.49	0.23	strict_AP
Pac	90	fusionseeker	43	67	69	387	0.15	0.49	0.23	strict_AP
Pac	90	fusionseeker	44	65	67	389	0.14	0.49	0.218	strict_AP
Pac	90	fusionseeker	46	63	65	391	0.14	0.49	0.218	strict_AP
Pac	90	fusionseeker	47	62	63	392	0.14	0.5	0.219	strict_AP
Pac	90	fusionseeker	48	61	59	393	0.13	0.51	0.207	strict_AP
Pac	90	fusionseeker	49	57	58	397	0.13	0.5	0.206	strict_AP
Pac	90	fusionseeker	50	55	55	399	0.12	0.5	0.194	strict_AP
Pac	90	fusionseeker	51	53	54	401	0.12	0.5	0.194	strict_AP
Pac	90	fusionseeker	52	51	54	403	0.11	0.49	0.18	strict_AP
Pac	90	fusionseeker	53	48	53	406	0.11	0.48	0.179	strict_AP
Pac	90	fusionseeker	55	46	52	408	0.1	0.47	0.165	strict_AP
Pac	90	fusionseeker	56	46	50	408	0.1	0.48	0.166	strict_AP
Pac	90	fusionseeker	57	44	47	410	0.1	0.48	0.166	strict_AP
Pac	90	fusionseeker	58	44	45	410	0.1	0.49	0.166	strict_AP
Pac	90	fusionseeker	60	42	44	412	0.09	0.49	0.152	strict_AP
Pac	90	fusionseeker	61	42	43	412	0.09	0.49	0.152	strict_AP
Pac	90	fusionseeker	64	42	42	412	0.09	0.5	0.153	strict_AP
Pac	90	fusionseeker	65	41	41	413	0.09	0.5	0.153	strict_AP
Pac	90	fusionseeker	66	40	40	414	0.09	0.5	0.153	strict_AP
Pac	90	fusionseeker	67	39	39	415	0.09	0.5	0.153	strict_AP
Pac	90	fusionseeker	68	38	38	416	0.08	0.5	0.138	strict_AP
Pac	90	fusionseeker	69	38	37	416	0.08	0.51	0.138	strict_AP
Pac	90	fusionseeker	70	37	37	417	0.08	0.5	0.138	strict_AP
Pac	90	fusionseeker	71	37	35	417	0.08	0.51	0.138	strict_AP
Pac	90	fusionseeker	74	36	35	418	0.08	0.51	0.138	strict_AP
Pac	90	fusionseeker	75	35	34	419	0.08	0.51	0.138	strict_AP
Pac	90	fusionseeker	76	34	32	420	0.07	0.52	0.123	strict_AP
Pac	90	fusionseeker	77	34	31	420	0.07	0.52	0.123	strict_AP
Pac	90	fusionseeker	78	32	29	422	0.07	0.52	0.123	strict_AP
Pac	90	fusionseeker	79	31	27	423	0.07	0.53	0.124	strict_AP
Pac	90	fusionseeker	80	30	26	424	0.07	0.54	0.124	strict_AP
Pac	90	fusionseeker	81	28	26	426	0.06	0.52	0.108	strict_AP
Pac	90	fusionseeker	82	27	23	427	0.06	0.54	0.108	strict_AP
Pac	90	fusionseeker	84	27	22	427	0.06	0.55	0.108	strict_AP
Pac	90	fusionseeker	87	23	19	431	0.05	0.55	0.092	strict_AP
Pac	90	fusionseeker	89	21	17	433	0.05	0.55	0.092	strict_AP
Pac	90	fusionseeker	90	20	16	434	0.04	0.56	0.075	strict_AP
Pac	90	fusionseeker	91	19	15	435	0.04	0.56	0.075	strict_AP
Pac	90	fusionseeker	92	17	15	437	0.04	0.53	0.074	strict_AP
Pac	90	fusionseeker	93	15	13	439	0.03	0.54	0.057	strict_AP
Pac	90	fusionseeker	94	13	10	441	0.03	0.57	0.057	strict_AP
Pac	90	fusionseeker	95	11	10	443	0.02	0.52	0.039	strict_AP
Pac	90	fusionseeker	97	8	8	446	0.02	0.5	0.038	strict_AP
Pac	90	fusionseeker	99	8	7	446	0.02	0.53	0.039	strict_AP
Pac	90	fusionseeker	100	7	7	447	0.02	0.5	0.038	strict_AP
Pac	90	fusionseeker	101	7	6	447	0.02	0.54	0.039	strict_AP
Pac	90	fusionseeker	102	7	4	447	0.02	0.64	0.039	strict_AP
Pac	90	fusionseeker	104	7	3	447	0.02	0.7	0.039	strict_AP
Pac	90	fusionseeker	105	7	2	447	0.02	0.78	0.039	strict_AP
Pac	90	fusionseeker	108	5	2	449	0.01	0.71	0.02	strict_AP
Pac	90	fusionseeker	109	3	2	451	0.01	0.6	0.02	strict_AP
Pac	90	fusionseeker	110	2	2	452	0	0.5	0	strict_AP
Pac	90	fusionseeker	116	2	1	452	0	0.67	0	strict_AP
Pac	90	fusionseeker	118	2	0	452	0	1	0	strict_AP
Pac	90	fusionseeker	172	1	0	453	0	1	0	strict_AP
ONT	75	JAFFAL	1	174	0	278	0.38	1	0.551	strict_AP
ONT	75	JAFFAL	2	156	0	296	0.35	1	0.519	strict_AP
ONT	75	JAFFAL	3	121	0	331	0.27	1	0.425	strict_AP
ONT	75	JAFFAL	4	105	0	347	0.23	1	0.374	strict_AP
ONT	75	JAFFAL	5	90	0	362	0.2	1	0.333	strict_AP
ONT	75	JAFFAL	6	78	0	374	0.17	1	0.291	strict_AP
ONT	75	JAFFAL	7	71	0	381	0.16	1	0.276	strict_AP
ONT	75	JAFFAL	8	66	0	386	0.15	1	0.261	strict_AP
ONT	75	JAFFAL	9	60	0	392	0.13	1	0.23	strict_AP
ONT	75	JAFFAL	10	55	0	397	0.12	1	0.214	strict_AP
ONT	75	JAFFAL	11	52	0	400	0.12	1	0.214	strict_AP
ONT	75	JAFFAL	12	51	0	401	0.11	1	0.198	strict_AP
ONT	75	JAFFAL	13	47	0	405	0.1	1	0.182	strict_AP
ONT	75	JAFFAL	14	42	0	410	0.09	1	0.165	strict_AP
ONT	75	JAFFAL	15	38	0	414	0.08	1	0.148	strict_AP
ONT	75	JAFFAL	16	37	0	415	0.08	1	0.148	strict_AP
ONT	75	JAFFAL	17	36	0	416	0.08	1	0.148	strict_AP
ONT	75	JAFFAL	18	35	0	417	0.08	1	0.148	strict_AP
ONT	75	JAFFAL	19	32	0	420	0.07	1	0.131	strict_AP
ONT	75	JAFFAL	20	28	0	424	0.06	1	0.113	strict_AP
ONT	75	JAFFAL	21	27	0	425	0.06	1	0.113	strict_AP
ONT	75	JAFFAL	22	24	0	428	0.05	1	0.095	strict_AP
ONT	75	JAFFAL	23	21	0	431	0.05	1	0.095	strict_AP
ONT	75	JAFFAL	24	19	0	433	0.04	1	0.077	strict_AP
ONT	75	JAFFAL	26	17	0	435	0.04	1	0.077	strict_AP
ONT	75	JAFFAL	27	13	0	439	0.03	1	0.058	strict_AP
ONT	75	JAFFAL	30	10	0	442	0.02	1	0.039	strict_AP
ONT	75	JAFFAL	32	8	0	444	0.02	1	0.039	strict_AP
ONT	75	JAFFAL	33	7	0	445	0.02	1	0.039	strict_AP
ONT	75	JAFFAL	39	6	0	446	0.01	1	0.02	strict_AP
ONT	75	JAFFAL	41	4	0	448	0.01	1	0.02	strict_AP
ONT	75	JAFFAL	52	2	0	450	0	1	0	strict_AP
ONT	75	JAFFAL	53	1	0	451	0	1	0	strict_AP
ONT	75	fusionseeker	1	159	157	293	0.35	0.5	0.412	strict_AP
ONT	75	fusionseeker	2	118	111	334	0.26	0.52	0.347	strict_AP
ONT	75	fusionseeker	3	100	87	352	0.22	0.53	0.311	strict_AP
ONT	75	fusionseeker	4	85	78	367	0.19	0.52	0.278	strict_AP
ONT	75	fusionseeker	5	77	65	375	0.17	0.54	0.259	strict_AP
ONT	75	fusionseeker	6	67	57	385	0.15	0.54	0.235	strict_AP
ONT	75	fusionseeker	7	63	54	389	0.14	0.54	0.222	strict_AP
ONT	75	fusionseeker	8	60	52	392	0.13	0.54	0.21	strict_AP
ONT	75	fusionseeker	9	58	50	394	0.13	0.54	0.21	strict_AP
ONT	75	fusionseeker	10	54	47	398	0.12	0.53	0.196	strict_AP
ONT	75	fusionseeker	11	54	45	398	0.12	0.55	0.197	strict_AP
ONT	75	fusionseeker	12	51	43	401	0.11	0.54	0.183	strict_AP
ONT	75	fusionseeker	13	47	41	405	0.1	0.53	0.168	strict_AP
ONT	75	fusionseeker	15	46	40	406	0.1	0.53	0.168	strict_AP
ONT	75	fusionseeker	16	42	39	410	0.09	0.52	0.153	strict_AP
ONT	75	fusionseeker	17	39	38	413	0.09	0.51	0.153	strict_AP
ONT	75	fusionseeker	18	39	37	413	0.09	0.51	0.153	strict_AP
ONT	75	fusionseeker	19	39	36	413	0.09	0.52	0.153	strict_AP
ONT	75	fusionseeker	20	36	34	416	0.08	0.51	0.138	strict_AP
ONT	75	fusionseeker	21	35	33	417	0.08	0.51	0.138	strict_AP
ONT	75	fusionseeker	22	33	33	419	0.07	0.5	0.123	strict_AP
ONT	75	fusionseeker	23	31	32	421	0.07	0.49	0.122	strict_AP
ONT	75	fusionseeker	24	29	32	423	0.06	0.48	0.107	strict_AP
ONT	75	fusionseeker	25	28	32	424	0.06	0.47	0.106	strict_AP
ONT	75	fusionseeker	26	26	32	426	0.06	0.45	0.106	strict_AP
ONT	75	fusionseeker	27	26	30	426	0.06	0.46	0.106	strict_AP
ONT	75	fusionseeker	28	26	29	426	0.06	0.47	0.106	strict_AP
ONT	75	fusionseeker	29	26	28	426	0.06	0.48	0.107	strict_AP
ONT	75	fusionseeker	30	24	25	428	0.05	0.49	0.091	strict_AP
ONT	75	fusionseeker	31	23	25	429	0.05	0.48	0.091	strict_AP
ONT	75	fusionseeker	32	22	24	430	0.05	0.48	0.091	strict_AP
ONT	75	fusionseeker	33	21	23	431	0.05	0.48	0.091	strict_AP
ONT	75	fusionseeker	34	21	21	431	0.05	0.5	0.091	strict_AP
ONT	75	fusionseeker	35	21	20	431	0.05	0.51	0.091	strict_AP
ONT	75	fusionseeker	36	20	19	432	0.04	0.51	0.074	strict_AP
ONT	75	fusionseeker	37	20	18	432	0.04	0.53	0.074	strict_AP
ONT	75	fusionseeker	40	20	17	432	0.04	0.54	0.074	strict_AP
ONT	75	fusionseeker	41	19	16	433	0.04	0.54	0.074	strict_AP
ONT	75	fusionseeker	43	19	13	433	0.04	0.59	0.075	strict_AP
ONT	75	fusionseeker	44	19	11	433	0.04	0.63	0.075	strict_AP
ONT	75	fusionseeker	45	17	11	435	0.04	0.61	0.075	strict_AP
ONT	75	fusionseeker	47	16	10	436	0.04	0.62	0.075	strict_AP
ONT	75	fusionseeker	48	15	8	437	0.03	0.65	0.057	strict_AP
ONT	75	fusionseeker	49	15	7	437	0.03	0.68	0.057	strict_AP
ONT	75	fusionseeker	50	12	7	440	0.03	0.63	0.057	strict_AP
ONT	75	fusionseeker	54	12	6	440	0.03	0.67	0.057	strict_AP
ONT	75	fusionseeker	55	10	6	442	0.02	0.62	0.039	strict_AP
ONT	75	fusionseeker	58	10	5	442	0.02	0.67	0.039	strict_AP
ONT	75	fusionseeker	59	8	4	444	0.02	0.67	0.039	strict_AP
ONT	75	fusionseeker	60	7	4	445	0.02	0.64	0.039	strict_AP
ONT	75	fusionseeker	61	6	3	446	0.01	0.67	0.02	strict_AP
ONT	75	fusionseeker	64	6	2	446	0.01	0.75	0.02	strict_AP
ONT	75	fusionseeker	67	5	2	447	0.01	0.71	0.02	strict_AP
ONT	75	fusionseeker	72	3	2	449	0.01	0.6	0.02	strict_AP
ONT	75	fusionseeker	75	2	2	450	0	0.5	0	strict_AP
ONT	75	fusionseeker	76	2	1	450	0	0.67	0	strict_AP
ONT	75	fusionseeker	79	2	0	450	0	1	0	strict_AP
ONT	75	fusionseeker	80	1	0	451	0	1	0	strict_AP
ONT	75	LongGF	1	114	124	338	0.25	0.48	0.329	strict_AP
ONT	75	LongGF	2	88	91	364	0.19	0.49	0.274	strict_AP
ONT	75	LongGF	3	72	83	380	0.16	0.46	0.237	strict_AP
ONT	75	LongGF	4	61	70	391	0.13	0.47	0.204	strict_AP
ONT	75	LongGF	5	48	58	404	0.11	0.45	0.177	strict_AP
ONT	75	LongGF	6	41	50	411	0.09	0.45	0.15	strict_AP
ONT	75	LongGF	7	39	48	413	0.09	0.45	0.15	strict_AP
ONT	75	LongGF	8	37	44	415	0.08	0.46	0.136	strict_AP
ONT	75	LongGF	9	35	40	417	0.08	0.47	0.137	strict_AP
ONT	75	LongGF	10	31	38	421	0.07	0.45	0.121	strict_AP
ONT	75	LongGF	11	31	35	421	0.07	0.47	0.122	strict_AP
ONT	75	LongGF	12	28	33	424	0.06	0.46	0.106	strict_AP
ONT	75	LongGF	13	26	32	426	0.06	0.45	0.106	strict_AP
ONT	75	LongGF	14	24	30	428	0.05	0.44	0.09	strict_AP
ONT	75	LongGF	15	22	29	430	0.05	0.43	0.09	strict_AP
ONT	75	LongGF	16	22	27	430	0.05	0.45	0.09	strict_AP
ONT	75	LongGF	17	22	25	430	0.05	0.47	0.09	strict_AP
ONT	75	LongGF	18	21	23	431	0.05	0.48	0.091	strict_AP
ONT	75	LongGF	19	19	23	433	0.04	0.45	0.073	strict_AP
ONT	75	LongGF	20	18	20	434	0.04	0.47	0.074	strict_AP
ONT	75	LongGF	21	18	19	434	0.04	0.49	0.074	strict_AP
ONT	75	LongGF	22	16	19	436	0.04	0.46	0.074	strict_AP
ONT	75	LongGF	23	14	18	438	0.03	0.44	0.056	strict_AP
ONT	75	LongGF	24	14	17	438	0.03	0.45	0.056	strict_AP
ONT	75	LongGF	25	13	17	439	0.03	0.43	0.056	strict_AP
ONT	75	LongGF	26	13	16	439	0.03	0.45	0.056	strict_AP
ONT	75	LongGF	27	13	15	439	0.03	0.46	0.056	strict_AP
ONT	75	LongGF	29	12	15	440	0.03	0.44	0.056	strict_AP
ONT	75	LongGF	30	12	12	440	0.03	0.5	0.057	strict_AP
ONT	75	LongGF	32	10	12	442	0.02	0.45	0.038	strict_AP
ONT	75	LongGF	33	8	12	444	0.02	0.4	0.038	strict_AP
ONT	75	LongGF	35	8	11	444	0.02	0.42	0.038	strict_AP
ONT	75	LongGF	36	8	8	444	0.02	0.5	0.038	strict_AP
ONT	75	LongGF	38	8	7	444	0.02	0.53	0.039	strict_AP
ONT	75	LongGF	39	7	6	445	0.02	0.54	0.039	strict_AP
ONT	75	LongGF	41	7	5	445	0.02	0.58	0.039	strict_AP
ONT	75	LongGF	42	6	5	446	0.01	0.55	0.02	strict_AP
ONT	75	LongGF	45	4	4	448	0.01	0.5	0.02	strict_AP
ONT	75	LongGF	48	4	2	448	0.01	0.67	0.02	strict_AP
ONT	75	LongGF	51	4	1	448	0.01	0.8	0.02	strict_AP
ONT	75	LongGF	52	3	1	449	0.01	0.75	0.02	strict_AP
ONT	75	LongGF	56	2	1	450	0	0.67	0	strict_AP
ONT	75	LongGF	58	1	1	451	0	0.5	0	strict_AP
ONT	75	LongGF	60	0	1	452	0	0	NA	strict_AP
ONT	75	ctat-LR-fusion	1	244	0	208	0.54	1	0.701	strict_AP
ONT	75	ctat-LR-fusion	2	181	0	271	0.4	1	0.571	strict_AP
ONT	75	ctat-LR-fusion	3	155	0	297	0.34	1	0.507	strict_AP
ONT	75	ctat-LR-fusion	4	128	0	324	0.28	1	0.438	strict_AP
ONT	75	ctat-LR-fusion	5	117	0	335	0.26	1	0.413	strict_AP
ONT	75	ctat-LR-fusion	6	111	0	341	0.25	1	0.4	strict_AP
ONT	75	ctat-LR-fusion	7	103	0	349	0.23	1	0.374	strict_AP
ONT	75	ctat-LR-fusion	8	96	0	356	0.21	1	0.347	strict_AP
ONT	75	ctat-LR-fusion	9	89	0	363	0.2	1	0.333	strict_AP
ONT	75	ctat-LR-fusion	10	83	0	369	0.18	1	0.305	strict_AP
ONT	75	ctat-LR-fusion	11	82	0	370	0.18	1	0.305	strict_AP
ONT	75	ctat-LR-fusion	12	80	0	372	0.18	1	0.305	strict_AP
ONT	75	ctat-LR-fusion	13	76	0	376	0.17	1	0.291	strict_AP
ONT	75	ctat-LR-fusion	14	74	0	378	0.16	1	0.276	strict_AP
ONT	75	ctat-LR-fusion	15	70	0	382	0.15	1	0.261	strict_AP
ONT	75	ctat-LR-fusion	16	68	0	384	0.15	1	0.261	strict_AP
ONT	75	ctat-LR-fusion	17	67	0	385	0.15	1	0.261	strict_AP
ONT	75	ctat-LR-fusion	18	65	0	387	0.14	1	0.246	strict_AP
ONT	75	ctat-LR-fusion	19	62	0	390	0.14	1	0.246	strict_AP
ONT	75	ctat-LR-fusion	20	60	0	392	0.13	1	0.23	strict_AP
ONT	75	ctat-LR-fusion	21	58	0	394	0.13	1	0.23	strict_AP
ONT	75	ctat-LR-fusion	22	53	0	399	0.12	1	0.214	strict_AP
ONT	75	ctat-LR-fusion	24	51	0	401	0.11	1	0.198	strict_AP
ONT	75	ctat-LR-fusion	25	48	0	404	0.11	1	0.198	strict_AP
ONT	75	ctat-LR-fusion	26	43	0	409	0.1	1	0.182	strict_AP
ONT	75	ctat-LR-fusion	28	39	0	413	0.09	1	0.165	strict_AP
ONT	75	ctat-LR-fusion	29	37	0	415	0.08	1	0.148	strict_AP
ONT	75	ctat-LR-fusion	30	34	0	418	0.08	1	0.148	strict_AP
ONT	75	ctat-LR-fusion	31	32	0	420	0.07	1	0.131	strict_AP
ONT	75	ctat-LR-fusion	32	31	0	421	0.07	1	0.131	strict_AP
ONT	75	ctat-LR-fusion	33	30	0	422	0.07	1	0.131	strict_AP
ONT	75	ctat-LR-fusion	35	28	0	424	0.06	1	0.113	strict_AP
ONT	75	ctat-LR-fusion	36	26	0	426	0.06	1	0.113	strict_AP
ONT	75	ctat-LR-fusion	38	25	0	427	0.06	1	0.113	strict_AP
ONT	75	ctat-LR-fusion	39	23	0	429	0.05	1	0.095	strict_AP
ONT	75	ctat-LR-fusion	41	17	0	435	0.04	1	0.077	strict_AP
ONT	75	ctat-LR-fusion	42	15	0	437	0.03	1	0.058	strict_AP
ONT	75	ctat-LR-fusion	45	14	0	438	0.03	1	0.058	strict_AP
ONT	75	ctat-LR-fusion	46	12	0	440	0.03	1	0.058	strict_AP
ONT	75	ctat-LR-fusion	48	11	0	441	0.02	1	0.039	strict_AP
ONT	75	ctat-LR-fusion	49	10	0	442	0.02	1	0.039	strict_AP
ONT	75	ctat-LR-fusion	50	8	0	444	0.02	1	0.039	strict_AP
ONT	75	ctat-LR-fusion	51	7	0	445	0.02	1	0.039	strict_AP
ONT	75	ctat-LR-fusion	52	6	0	446	0.01	1	0.02	strict_AP
ONT	75	ctat-LR-fusion	54	5	0	447	0.01	1	0.02	strict_AP
ONT	75	ctat-LR-fusion	58	4	0	448	0.01	1	0.02	strict_AP
ONT	75	ctat-LR-fusion	64	3	0	449	0.01	1	0.02	strict_AP
ONT	75	ctat-LR-fusion	65	2	0	450	0	1	0	strict_AP
ONT	75	ctat-LR-fusion	74	1	0	451	0	1	0	strict_AP
ONT	80	pbfusion	1	1	0	446	0	1	0	strict_AP
ONT	80	JAFFAL	1	265	3	182	0.59	0.99	0.739	strict_AP
ONT	80	JAFFAL	2	240	3	207	0.54	0.99	0.699	strict_AP
ONT	80	JAFFAL	3	198	3	249	0.44	0.99	0.609	strict_AP
ONT	80	JAFFAL	4	182	2	265	0.41	0.99	0.58	strict_AP
ONT	80	JAFFAL	5	161	1	286	0.36	0.99	0.528	strict_AP
ONT	80	JAFFAL	6	151	1	296	0.34	0.99	0.506	strict_AP
ONT	80	JAFFAL	7	146	1	301	0.33	0.99	0.495	strict_AP
ONT	80	JAFFAL	8	130	1	317	0.29	0.99	0.449	strict_AP
ONT	80	JAFFAL	9	121	1	326	0.27	0.99	0.424	strict_AP
ONT	80	JAFFAL	10	115	0	332	0.26	1	0.413	strict_AP
ONT	80	JAFFAL	11	114	0	333	0.26	1	0.413	strict_AP
ONT	80	JAFFAL	12	106	0	341	0.24	1	0.387	strict_AP
ONT	80	JAFFAL	13	102	0	345	0.23	1	0.374	strict_AP
ONT	80	JAFFAL	14	98	0	349	0.22	1	0.361	strict_AP
ONT	80	JAFFAL	15	96	0	351	0.21	1	0.347	strict_AP
ONT	80	JAFFAL	16	88	0	359	0.2	1	0.333	strict_AP
ONT	80	JAFFAL	17	87	0	360	0.19	1	0.319	strict_AP
ONT	80	JAFFAL	18	81	0	366	0.18	1	0.305	strict_AP
ONT	80	JAFFAL	19	77	0	370	0.17	1	0.291	strict_AP
ONT	80	JAFFAL	20	72	0	375	0.16	1	0.276	strict_AP
ONT	80	JAFFAL	21	68	0	379	0.15	1	0.261	strict_AP
ONT	80	JAFFAL	22	65	0	382	0.15	1	0.261	strict_AP
ONT	80	JAFFAL	23	63	0	384	0.14	1	0.246	strict_AP
ONT	80	JAFFAL	25	58	0	389	0.13	1	0.23	strict_AP
ONT	80	JAFFAL	26	55	0	392	0.12	1	0.214	strict_AP
ONT	80	JAFFAL	27	53	0	394	0.12	1	0.214	strict_AP
ONT	80	JAFFAL	28	50	0	397	0.11	1	0.198	strict_AP
ONT	80	JAFFAL	29	48	0	399	0.11	1	0.198	strict_AP
ONT	80	JAFFAL	30	44	0	403	0.1	1	0.182	strict_AP
ONT	80	JAFFAL	31	42	0	405	0.09	1	0.165	strict_AP
ONT	80	JAFFAL	33	38	0	409	0.09	1	0.165	strict_AP
ONT	80	JAFFAL	34	35	0	412	0.08	1	0.148	strict_AP
ONT	80	JAFFAL	35	31	0	416	0.07	1	0.131	strict_AP
ONT	80	JAFFAL	36	29	0	418	0.06	1	0.113	strict_AP
ONT	80	JAFFAL	37	27	0	420	0.06	1	0.113	strict_AP
ONT	80	JAFFAL	38	23	0	424	0.05	1	0.095	strict_AP
ONT	80	JAFFAL	39	22	0	425	0.05	1	0.095	strict_AP
ONT	80	JAFFAL	40	21	0	426	0.05	1	0.095	strict_AP
ONT	80	JAFFAL	42	20	0	427	0.04	1	0.077	strict_AP
ONT	80	JAFFAL	43	19	0	428	0.04	1	0.077	strict_AP
ONT	80	JAFFAL	45	18	0	429	0.04	1	0.077	strict_AP
ONT	80	JAFFAL	46	16	0	431	0.04	1	0.077	strict_AP
ONT	80	JAFFAL	47	15	0	432	0.03	1	0.058	strict_AP
ONT	80	JAFFAL	48	14	0	433	0.03	1	0.058	strict_AP
ONT	80	JAFFAL	49	13	0	434	0.03	1	0.058	strict_AP
ONT	80	JAFFAL	50	11	0	436	0.02	1	0.039	strict_AP
ONT	80	JAFFAL	51	10	0	437	0.02	1	0.039	strict_AP
ONT	80	JAFFAL	52	9	0	438	0.02	1	0.039	strict_AP
ONT	80	JAFFAL	54	8	0	439	0.02	1	0.039	strict_AP
ONT	80	JAFFAL	58	7	0	440	0.02	1	0.039	strict_AP
ONT	80	JAFFAL	59	6	0	441	0.01	1	0.02	strict_AP
ONT	80	JAFFAL	60	5	0	442	0.01	1	0.02	strict_AP
ONT	80	JAFFAL	61	4	0	443	0.01	1	0.02	strict_AP
ONT	80	JAFFAL	64	3	0	444	0.01	1	0.02	strict_AP
ONT	80	JAFFAL	66	2	0	445	0	1	0	strict_AP
ONT	80	JAFFAL	79	1	0	446	0	1	0	strict_AP
ONT	80	fusionseeker	1	199	177	248	0.45	0.53	0.487	strict_AP
ONT	80	fusionseeker	2	166	131	281	0.37	0.56	0.446	strict_AP
ONT	80	fusionseeker	3	146	104	301	0.33	0.58	0.421	strict_AP
ONT	80	fusionseeker	4	137	92	310	0.31	0.6	0.409	strict_AP
ONT	80	fusionseeker	5	124	85	323	0.28	0.59	0.38	strict_AP
ONT	80	fusionseeker	6	119	80	328	0.27	0.6	0.372	strict_AP
ONT	80	fusionseeker	7	106	73	341	0.24	0.59	0.341	strict_AP
ONT	80	fusionseeker	8	100	69	347	0.22	0.59	0.32	strict_AP
ONT	80	fusionseeker	9	97	65	350	0.22	0.6	0.322	strict_AP
ONT	80	fusionseeker	10	93	62	354	0.21	0.6	0.311	strict_AP
ONT	80	fusionseeker	11	88	57	359	0.2	0.61	0.301	strict_AP
ONT	80	fusionseeker	12	87	56	360	0.19	0.61	0.29	strict_AP
ONT	80	fusionseeker	13	86	56	361	0.19	0.61	0.29	strict_AP
ONT	80	fusionseeker	14	84	53	363	0.19	0.61	0.29	strict_AP
ONT	80	fusionseeker	15	80	52	367	0.18	0.61	0.278	strict_AP
ONT	80	fusionseeker	16	79	49	368	0.18	0.62	0.279	strict_AP
ONT	80	fusionseeker	18	75	47	372	0.17	0.61	0.266	strict_AP
ONT	80	fusionseeker	19	74	46	373	0.17	0.62	0.267	strict_AP
ONT	80	fusionseeker	20	71	46	376	0.16	0.61	0.254	strict_AP
ONT	80	fusionseeker	21	71	45	376	0.16	0.61	0.254	strict_AP
ONT	80	fusionseeker	22	71	43	376	0.16	0.62	0.254	strict_AP
ONT	80	fusionseeker	24	67	42	380	0.15	0.61	0.241	strict_AP
ONT	80	fusionseeker	25	66	41	381	0.15	0.62	0.242	strict_AP
ONT	80	fusionseeker	26	66	37	381	0.15	0.64	0.243	strict_AP
ONT	80	fusionseeker	27	64	37	383	0.14	0.63	0.229	strict_AP
ONT	80	fusionseeker	28	62	34	385	0.14	0.65	0.23	strict_AP
ONT	80	fusionseeker	29	61	34	386	0.14	0.64	0.23	strict_AP
ONT	80	fusionseeker	30	58	32	389	0.13	0.64	0.216	strict_AP
ONT	80	fusionseeker	31	56	30	391	0.13	0.65	0.217	strict_AP
ONT	80	fusionseeker	32	54	30	393	0.12	0.64	0.202	strict_AP
ONT	80	fusionseeker	33	53	29	394	0.12	0.65	0.203	strict_AP
ONT	80	fusionseeker	34	51	28	396	0.11	0.65	0.188	strict_AP
ONT	80	fusionseeker	35	49	26	398	0.11	0.65	0.188	strict_AP
ONT	80	fusionseeker	36	48	26	399	0.11	0.65	0.188	strict_AP
ONT	80	fusionseeker	37	46	26	401	0.1	0.64	0.173	strict_AP
ONT	80	fusionseeker	38	46	25	401	0.1	0.65	0.173	strict_AP
ONT	80	fusionseeker	39	45	23	402	0.1	0.66	0.174	strict_AP
ONT	80	fusionseeker	40	44	20	403	0.1	0.69	0.175	strict_AP
ONT	80	fusionseeker	41	40	19	407	0.09	0.68	0.159	strict_AP
ONT	80	fusionseeker	42	39	18	408	0.09	0.68	0.159	strict_AP
ONT	80	fusionseeker	43	39	16	408	0.09	0.71	0.16	strict_AP
ONT	80	fusionseeker	44	38	16	409	0.09	0.7	0.159	strict_AP
ONT	80	fusionseeker	46	38	15	409	0.09	0.72	0.16	strict_AP
ONT	80	fusionseeker	48	37	14	410	0.08	0.73	0.144	strict_AP
ONT	80	fusionseeker	49	34	14	413	0.08	0.71	0.144	strict_AP
ONT	80	fusionseeker	50	31	11	416	0.07	0.74	0.128	strict_AP
ONT	80	fusionseeker	52	29	11	418	0.06	0.72	0.111	strict_AP
ONT	80	fusionseeker	58	26	11	421	0.06	0.7	0.111	strict_AP
ONT	80	fusionseeker	59	25	11	422	0.06	0.69	0.11	strict_AP
ONT	80	fusionseeker	60	23	10	424	0.05	0.7	0.093	strict_AP
ONT	80	fusionseeker	61	22	10	425	0.05	0.69	0.093	strict_AP
ONT	80	fusionseeker	62	21	10	426	0.05	0.68	0.093	strict_AP
ONT	80	fusionseeker	63	20	10	427	0.04	0.67	0.075	strict_AP
ONT	80	fusionseeker	65	20	9	427	0.04	0.69	0.076	strict_AP
ONT	80	fusionseeker	66	20	7	427	0.04	0.74	0.076	strict_AP
ONT	80	fusionseeker	67	19	7	428	0.04	0.73	0.076	strict_AP
ONT	80	fusionseeker	68	18	7	429	0.04	0.72	0.076	strict_AP
ONT	80	fusionseeker	69	18	6	429	0.04	0.75	0.076	strict_AP
ONT	80	fusionseeker	70	18	5	429	0.04	0.78	0.076	strict_AP
ONT	80	fusionseeker	71	17	5	430	0.04	0.77	0.076	strict_AP
ONT	80	fusionseeker	72	16	5	431	0.04	0.76	0.076	strict_AP
ONT	80	fusionseeker	73	15	4	432	0.03	0.79	0.058	strict_AP
ONT	80	fusionseeker	74	13	4	434	0.03	0.76	0.058	strict_AP
ONT	80	fusionseeker	75	12	4	435	0.03	0.75	0.058	strict_AP
ONT	80	fusionseeker	76	11	3	436	0.02	0.79	0.039	strict_AP
ONT	80	fusionseeker	77	9	3	438	0.02	0.75	0.039	strict_AP
ONT	80	fusionseeker	78	9	2	438	0.02	0.82	0.039	strict_AP
ONT	80	fusionseeker	81	8	2	439	0.02	0.8	0.039	strict_AP
ONT	80	fusionseeker	82	7	2	440	0.02	0.78	0.039	strict_AP
ONT	80	fusionseeker	86	6	1	441	0.01	0.86	0.02	strict_AP
ONT	80	fusionseeker	90	5	1	442	0.01	0.83	0.02	strict_AP
ONT	80	fusionseeker	91	4	1	443	0.01	0.8	0.02	strict_AP
ONT	80	fusionseeker	92	3	1	444	0.01	0.75	0.02	strict_AP
ONT	80	fusionseeker	93	2	1	445	0	0.67	0	strict_AP
ONT	80	fusionseeker	98	1	1	446	0	0.5	0	strict_AP
ONT	80	fusionseeker	99	1	0	446	0	1	0	strict_AP
ONT	80	LongGF	1	171	156	276	0.38	0.52	0.439	strict_AP
ONT	80	LongGF	2	144	122	303	0.32	0.54	0.402	strict_AP
ONT	80	LongGF	3	120	100	327	0.27	0.55	0.362	strict_AP
ONT	80	LongGF	4	110	96	337	0.25	0.53	0.34	strict_AP
ONT	80	LongGF	5	104	85	343	0.23	0.55	0.324	strict_AP
ONT	80	LongGF	6	99	77	348	0.22	0.56	0.316	strict_AP
ONT	80	LongGF	7	92	71	355	0.21	0.56	0.305	strict_AP
ONT	80	LongGF	8	83	69	364	0.19	0.55	0.282	strict_AP
ONT	80	LongGF	9	78	65	369	0.17	0.55	0.26	strict_AP
ONT	80	LongGF	10	75	61	372	0.17	0.55	0.26	strict_AP
ONT	80	LongGF	11	72	56	375	0.16	0.56	0.249	strict_AP
ONT	80	LongGF	12	69	53	378	0.15	0.57	0.237	strict_AP
ONT	80	LongGF	13	66	52	381	0.15	0.56	0.237	strict_AP
ONT	80	LongGF	14	66	50	381	0.15	0.57	0.237	strict_AP
ONT	80	LongGF	15	65	49	382	0.15	0.57	0.237	strict_AP
ONT	80	LongGF	16	61	48	386	0.14	0.56	0.224	strict_AP
ONT	80	LongGF	17	59	48	388	0.13	0.55	0.21	strict_AP
ONT	80	LongGF	18	59	45	388	0.13	0.57	0.212	strict_AP
ONT	80	LongGF	19	56	45	391	0.13	0.55	0.21	strict_AP
ONT	80	LongGF	20	55	43	392	0.12	0.56	0.198	strict_AP
ONT	80	LongGF	21	53	42	394	0.12	0.56	0.198	strict_AP
ONT	80	LongGF	22	52	40	395	0.12	0.57	0.198	strict_AP
ONT	80	LongGF	23	47	38	400	0.11	0.55	0.183	strict_AP
ONT	80	LongGF	24	45	38	402	0.1	0.54	0.169	strict_AP
ONT	80	LongGF	25	43	37	404	0.1	0.54	0.169	strict_AP
ONT	80	LongGF	26	43	36	404	0.1	0.54	0.169	strict_AP
ONT	80	LongGF	27	42	35	405	0.09	0.55	0.155	strict_AP
ONT	80	LongGF	28	42	32	405	0.09	0.57	0.155	strict_AP
ONT	80	LongGF	29	38	32	409	0.09	0.54	0.154	strict_AP
ONT	80	LongGF	30	37	31	410	0.08	0.54	0.139	strict_AP
ONT	80	LongGF	31	35	28	412	0.08	0.56	0.14	strict_AP
ONT	80	LongGF	32	33	26	414	0.07	0.56	0.124	strict_AP
ONT	80	LongGF	33	31	25	416	0.07	0.55	0.124	strict_AP
ONT	80	LongGF	34	29	25	418	0.06	0.54	0.108	strict_AP
ONT	80	LongGF	35	28	23	419	0.06	0.55	0.108	strict_AP
ONT	80	LongGF	36	26	23	421	0.06	0.53	0.108	strict_AP
ONT	80	LongGF	37	24	21	423	0.05	0.53	0.091	strict_AP
ONT	80	LongGF	38	22	21	425	0.05	0.51	0.091	strict_AP
ONT	80	LongGF	39	20	20	427	0.04	0.5	0.074	strict_AP
ONT	80	LongGF	40	20	19	427	0.04	0.51	0.074	strict_AP
ONT	80	LongGF	41	19	16	428	0.04	0.54	0.074	strict_AP
ONT	80	LongGF	43	18	15	429	0.04	0.55	0.075	strict_AP
ONT	80	LongGF	44	16	15	431	0.04	0.52	0.074	strict_AP
ONT	80	LongGF	45	15	14	432	0.03	0.52	0.057	strict_AP
ONT	80	LongGF	49	14	14	433	0.03	0.5	0.057	strict_AP
ONT	80	LongGF	50	12	14	435	0.03	0.46	0.056	strict_AP
ONT	80	LongGF	51	10	12	437	0.02	0.45	0.038	strict_AP
ONT	80	LongGF	54	9	11	438	0.02	0.45	0.038	strict_AP
ONT	80	LongGF	56	9	10	438	0.02	0.47	0.038	strict_AP
ONT	80	LongGF	57	8	10	439	0.02	0.44	0.038	strict_AP
ONT	80	LongGF	58	8	9	439	0.02	0.47	0.038	strict_AP
ONT	80	LongGF	59	8	8	439	0.02	0.5	0.038	strict_AP
ONT	80	LongGF	62	8	7	439	0.02	0.53	0.039	strict_AP
ONT	80	LongGF	63	8	6	439	0.02	0.57	0.039	strict_AP
ONT	80	LongGF	64	6	6	441	0.01	0.5	0.02	strict_AP
ONT	80	LongGF	65	6	5	441	0.01	0.55	0.02	strict_AP
ONT	80	LongGF	68	5	5	442	0.01	0.5	0.02	strict_AP
ONT	80	LongGF	69	4	5	443	0.01	0.44	0.02	strict_AP
ONT	80	LongGF	70	3	5	444	0.01	0.38	0.019	strict_AP
ONT	80	LongGF	72	2	4	445	0	0.33	0	strict_AP
ONT	80	LongGF	75	1	3	446	0	0.25	0	strict_AP
ONT	80	LongGF	76	1	2	446	0	0.33	0	strict_AP
ONT	80	LongGF	78	1	1	446	0	0.5	0	strict_AP
ONT	80	LongGF	86	1	0	446	0	1	0	strict_AP
ONT	80	ctat-LR-fusion	1	321	0	126	0.72	1	0.837	strict_AP
ONT	80	ctat-LR-fusion	2	275	0	172	0.62	1	0.765	strict_AP
ONT	80	ctat-LR-fusion	3	237	0	210	0.53	1	0.693	strict_AP
ONT	80	ctat-LR-fusion	4	212	0	235	0.47	1	0.639	strict_AP
ONT	80	ctat-LR-fusion	5	197	0	250	0.44	1	0.611	strict_AP
ONT	80	ctat-LR-fusion	6	179	0	268	0.4	1	0.571	strict_AP
ONT	80	ctat-LR-fusion	7	169	0	278	0.38	1	0.551	strict_AP
ONT	80	ctat-LR-fusion	8	160	0	287	0.36	1	0.529	strict_AP
ONT	80	ctat-LR-fusion	9	151	0	296	0.34	1	0.507	strict_AP
ONT	80	ctat-LR-fusion	10	145	0	302	0.32	1	0.485	strict_AP
ONT	80	ctat-LR-fusion	11	131	0	316	0.29	1	0.45	strict_AP
ONT	80	ctat-LR-fusion	12	128	0	319	0.29	1	0.45	strict_AP
ONT	80	ctat-LR-fusion	13	127	0	320	0.28	1	0.438	strict_AP
ONT	80	ctat-LR-fusion	14	121	0	326	0.27	1	0.425	strict_AP
ONT	80	ctat-LR-fusion	15	120	0	327	0.27	1	0.425	strict_AP
ONT	80	ctat-LR-fusion	16	118	0	329	0.26	1	0.413	strict_AP
ONT	80	ctat-LR-fusion	17	112	0	335	0.25	1	0.4	strict_AP
ONT	80	ctat-LR-fusion	18	110	0	337	0.25	1	0.4	strict_AP
ONT	80	ctat-LR-fusion	19	109	0	338	0.24	1	0.387	strict_AP
ONT	80	ctat-LR-fusion	20	104	0	343	0.23	1	0.374	strict_AP
ONT	80	ctat-LR-fusion	21	103	0	344	0.23	1	0.374	strict_AP
ONT	80	ctat-LR-fusion	22	97	0	350	0.22	1	0.361	strict_AP
ONT	80	ctat-LR-fusion	23	91	0	356	0.2	1	0.333	strict_AP
ONT	80	ctat-LR-fusion	24	88	0	359	0.2	1	0.333	strict_AP
ONT	80	ctat-LR-fusion	25	83	0	364	0.19	1	0.319	strict_AP
ONT	80	ctat-LR-fusion	26	82	0	365	0.18	1	0.305	strict_AP
ONT	80	ctat-LR-fusion	27	80	0	367	0.18	1	0.305	strict_AP
ONT	80	ctat-LR-fusion	28	78	0	369	0.17	1	0.291	strict_AP
ONT	80	ctat-LR-fusion	29	76	0	371	0.17	1	0.291	strict_AP
ONT	80	ctat-LR-fusion	30	75	0	372	0.17	1	0.291	strict_AP
ONT	80	ctat-LR-fusion	31	74	0	373	0.17	1	0.291	strict_AP
ONT	80	ctat-LR-fusion	32	69	0	378	0.15	1	0.261	strict_AP
ONT	80	ctat-LR-fusion	33	65	0	382	0.15	1	0.261	strict_AP
ONT	80	ctat-LR-fusion	34	64	0	383	0.14	1	0.246	strict_AP
ONT	80	ctat-LR-fusion	35	63	0	384	0.14	1	0.246	strict_AP
ONT	80	ctat-LR-fusion	36	61	0	386	0.14	1	0.246	strict_AP
ONT	80	ctat-LR-fusion	37	60	0	387	0.13	1	0.23	strict_AP
ONT	80	ctat-LR-fusion	38	55	0	392	0.12	1	0.214	strict_AP
ONT	80	ctat-LR-fusion	39	54	0	393	0.12	1	0.214	strict_AP
ONT	80	ctat-LR-fusion	40	52	0	395	0.12	1	0.214	strict_AP
ONT	80	ctat-LR-fusion	42	49	0	398	0.11	1	0.198	strict_AP
ONT	80	ctat-LR-fusion	43	48	0	399	0.11	1	0.198	strict_AP
ONT	80	ctat-LR-fusion	44	46	0	401	0.1	1	0.182	strict_AP
ONT	80	ctat-LR-fusion	45	44	0	403	0.1	1	0.182	strict_AP
ONT	80	ctat-LR-fusion	46	41	0	406	0.09	1	0.165	strict_AP
ONT	80	ctat-LR-fusion	47	39	0	408	0.09	1	0.165	strict_AP
ONT	80	ctat-LR-fusion	48	37	0	410	0.08	1	0.148	strict_AP
ONT	80	ctat-LR-fusion	49	36	0	411	0.08	1	0.148	strict_AP
ONT	80	ctat-LR-fusion	50	35	0	412	0.08	1	0.148	strict_AP
ONT	80	ctat-LR-fusion	51	31	0	416	0.07	1	0.131	strict_AP
ONT	80	ctat-LR-fusion	53	30	0	417	0.07	1	0.131	strict_AP
ONT	80	ctat-LR-fusion	54	28	0	419	0.06	1	0.113	strict_AP
ONT	80	ctat-LR-fusion	56	27	0	420	0.06	1	0.113	strict_AP
ONT	80	ctat-LR-fusion	57	25	0	422	0.06	1	0.113	strict_AP
ONT	80	ctat-LR-fusion	61	22	0	425	0.05	1	0.095	strict_AP
ONT	80	ctat-LR-fusion	62	21	0	426	0.05	1	0.095	strict_AP
ONT	80	ctat-LR-fusion	63	20	0	427	0.04	1	0.077	strict_AP
ONT	80	ctat-LR-fusion	64	19	0	428	0.04	1	0.077	strict_AP
ONT	80	ctat-LR-fusion	65	18	0	429	0.04	1	0.077	strict_AP
ONT	80	ctat-LR-fusion	67	17	0	430	0.04	1	0.077	strict_AP
ONT	80	ctat-LR-fusion	68	14	0	433	0.03	1	0.058	strict_AP
ONT	80	ctat-LR-fusion	69	12	0	435	0.03	1	0.058	strict_AP
ONT	80	ctat-LR-fusion	71	11	0	436	0.02	1	0.039	strict_AP
ONT	80	ctat-LR-fusion	76	9	0	438	0.02	1	0.039	strict_AP
ONT	80	ctat-LR-fusion	77	7	0	440	0.02	1	0.039	strict_AP
ONT	80	ctat-LR-fusion	79	6	0	441	0.01	1	0.02	strict_AP
ONT	80	ctat-LR-fusion	83	5	0	442	0.01	1	0.02	strict_AP
ONT	80	ctat-LR-fusion	88	4	0	443	0.01	1	0.02	strict_AP
ONT	80	ctat-LR-fusion	90	3	0	444	0.01	1	0.02	strict_AP
ONT	80	ctat-LR-fusion	92	2	0	445	0	1	0	strict_AP
ONT	80	ctat-LR-fusion	96	1	0	446	0	1	0	strict_AP
ONT	90	pbfusion	1	23	0	438	0.05	1	0.095	strict_AP
ONT	90	pbfusion	2	15	0	446	0.03	1	0.058	strict_AP
ONT	90	pbfusion	3	11	0	450	0.02	1	0.039	strict_AP
ONT	90	pbfusion	4	9	0	452	0.02	1	0.039	strict_AP
ONT	90	pbfusion	6	7	0	454	0.02	1	0.039	strict_AP
ONT	90	pbfusion	8	6	0	455	0.01	1	0.02	strict_AP
ONT	90	pbfusion	10	4	0	457	0.01	1	0.02	strict_AP
ONT	90	pbfusion	17	3	0	458	0.01	1	0.02	strict_AP
ONT	90	pbfusion	33	2	0	459	0	1	0	strict_AP
ONT	90	pbfusion	43	1	0	460	0	1	0	strict_AP
ONT	90	LongGF	1	210	216	251	0.46	0.49	0.475	strict_AP
ONT	90	LongGF	2	180	177	281	0.39	0.5	0.438	strict_AP
ONT	90	LongGF	3	156	151	305	0.34	0.51	0.408	strict_AP
ONT	90	LongGF	4	145	140	316	0.31	0.51	0.386	strict_AP
ONT	90	LongGF	5	138	135	323	0.3	0.51	0.378	strict_AP
ONT	90	LongGF	6	128	133	333	0.28	0.49	0.356	strict_AP
ONT	90	LongGF	7	123	129	338	0.27	0.49	0.348	strict_AP
ONT	90	LongGF	8	117	125	344	0.25	0.48	0.329	strict_AP
ONT	90	LongGF	9	114	119	347	0.25	0.49	0.331	strict_AP
ONT	90	LongGF	10	110	112	351	0.24	0.5	0.324	strict_AP
ONT	90	LongGF	11	103	107	358	0.22	0.49	0.304	strict_AP
ONT	90	LongGF	12	99	104	362	0.21	0.49	0.294	strict_AP
ONT	90	LongGF	13	95	103	366	0.21	0.48	0.292	strict_AP
ONT	90	LongGF	14	94	100	367	0.2	0.48	0.282	strict_AP
ONT	90	LongGF	15	93	99	368	0.2	0.48	0.282	strict_AP
ONT	90	LongGF	16	92	98	369	0.2	0.48	0.282	strict_AP
ONT	90	LongGF	18	92	97	369	0.2	0.49	0.284	strict_AP
ONT	90	LongGF	19	92	96	369	0.2	0.49	0.284	strict_AP
ONT	90	LongGF	20	91	95	370	0.2	0.49	0.284	strict_AP
ONT	90	LongGF	21	91	94	370	0.2	0.49	0.284	strict_AP
ONT	90	LongGF	22	90	94	371	0.2	0.49	0.284	strict_AP
ONT	90	LongGF	23	90	93	371	0.2	0.49	0.284	strict_AP
ONT	90	LongGF	24	88	92	373	0.19	0.49	0.274	strict_AP
ONT	90	LongGF	25	88	89	373	0.19	0.5	0.275	strict_AP
ONT	90	LongGF	26	86	88	375	0.19	0.49	0.274	strict_AP
ONT	90	LongGF	28	86	86	375	0.19	0.5	0.275	strict_AP
ONT	90	LongGF	30	86	85	375	0.19	0.5	0.275	strict_AP
ONT	90	LongGF	31	84	85	377	0.18	0.5	0.265	strict_AP
ONT	90	LongGF	32	84	83	377	0.18	0.5	0.265	strict_AP
ONT	90	LongGF	33	82	82	379	0.18	0.5	0.265	strict_AP
ONT	90	LongGF	34	80	80	381	0.17	0.5	0.254	strict_AP
ONT	90	LongGF	35	78	78	383	0.17	0.5	0.254	strict_AP
ONT	90	LongGF	36	76	77	385	0.16	0.5	0.242	strict_AP
ONT	90	LongGF	37	76	72	385	0.16	0.51	0.244	strict_AP
ONT	90	LongGF	38	76	70	385	0.16	0.52	0.245	strict_AP
ONT	90	LongGF	39	74	69	387	0.16	0.52	0.245	strict_AP
ONT	90	LongGF	40	73	66	388	0.16	0.53	0.246	strict_AP
ONT	90	LongGF	41	71	65	390	0.15	0.52	0.233	strict_AP
ONT	90	LongGF	42	70	61	391	0.15	0.53	0.234	strict_AP
ONT	90	LongGF	43	68	61	393	0.15	0.53	0.234	strict_AP
ONT	90	LongGF	44	67	57	394	0.15	0.54	0.235	strict_AP
ONT	90	LongGF	45	65	55	396	0.14	0.54	0.222	strict_AP
ONT	90	LongGF	46	64	55	397	0.14	0.54	0.222	strict_AP
ONT	90	LongGF	47	63	54	398	0.14	0.54	0.222	strict_AP
ONT	90	LongGF	48	61	53	400	0.13	0.54	0.21	strict_AP
ONT	90	LongGF	49	58	51	403	0.13	0.53	0.209	strict_AP
ONT	90	LongGF	50	56	49	405	0.12	0.53	0.196	strict_AP
ONT	90	LongGF	51	55	45	406	0.12	0.55	0.197	strict_AP
ONT	90	LongGF	52	53	44	408	0.11	0.55	0.183	strict_AP
ONT	90	LongGF	53	52	42	409	0.11	0.55	0.183	strict_AP
ONT	90	LongGF	54	51	41	410	0.11	0.55	0.183	strict_AP
ONT	90	LongGF	56	50	39	411	0.11	0.56	0.184	strict_AP
ONT	90	LongGF	57	48	38	413	0.1	0.56	0.17	strict_AP
ONT	90	LongGF	58	47	38	414	0.1	0.55	0.169	strict_AP
ONT	90	LongGF	59	46	37	415	0.1	0.55	0.169	strict_AP
ONT	90	LongGF	61	45	36	416	0.1	0.56	0.17	strict_AP
ONT	90	LongGF	62	44	36	417	0.1	0.55	0.169	strict_AP
ONT	90	LongGF	63	43	36	418	0.09	0.54	0.154	strict_AP
ONT	90	LongGF	64	42	34	419	0.09	0.55	0.155	strict_AP
ONT	90	LongGF	65	41	30	420	0.09	0.58	0.156	strict_AP
ONT	90	LongGF	67	40	29	421	0.09	0.58	0.156	strict_AP
ONT	90	LongGF	68	38	29	423	0.08	0.57	0.14	strict_AP
ONT	90	LongGF	69	37	28	424	0.08	0.57	0.14	strict_AP
ONT	90	LongGF	70	36	27	425	0.08	0.57	0.14	strict_AP
ONT	90	LongGF	71	35	25	426	0.08	0.58	0.141	strict_AP
ONT	90	LongGF	73	33	25	428	0.07	0.57	0.125	strict_AP
ONT	90	LongGF	74	32	25	429	0.07	0.56	0.124	strict_AP
ONT	90	LongGF	75	32	24	429	0.07	0.57	0.125	strict_AP
ONT	90	LongGF	76	30	23	431	0.07	0.57	0.125	strict_AP
ONT	90	LongGF	78	29	23	432	0.06	0.56	0.108	strict_AP
ONT	90	LongGF	79	27	23	434	0.06	0.54	0.108	strict_AP
ONT	90	LongGF	80	26	19	435	0.06	0.58	0.109	strict_AP
ONT	90	LongGF	82	21	18	440	0.05	0.54	0.092	strict_AP
ONT	90	LongGF	83	21	17	440	0.05	0.55	0.092	strict_AP
ONT	90	LongGF	84	21	15	440	0.05	0.58	0.092	strict_AP
ONT	90	LongGF	85	19	14	442	0.04	0.58	0.075	strict_AP
ONT	90	LongGF	86	19	13	442	0.04	0.59	0.075	strict_AP
ONT	90	LongGF	87	18	11	443	0.04	0.62	0.075	strict_AP
ONT	90	LongGF	89	15	8	446	0.03	0.65	0.057	strict_AP
ONT	90	LongGF	90	15	7	446	0.03	0.68	0.057	strict_AP
ONT	90	LongGF	91	14	7	447	0.03	0.67	0.057	strict_AP
ONT	90	LongGF	92	13	7	448	0.03	0.65	0.057	strict_AP
ONT	90	LongGF	93	10	6	451	0.02	0.62	0.039	strict_AP
ONT	90	LongGF	94	10	5	451	0.02	0.67	0.039	strict_AP
ONT	90	LongGF	95	8	5	453	0.02	0.62	0.039	strict_AP
ONT	90	LongGF	97	7	5	454	0.02	0.58	0.039	strict_AP
ONT	90	LongGF	98	7	4	454	0.02	0.64	0.039	strict_AP
ONT	90	LongGF	101	6	4	455	0.01	0.6	0.02	strict_AP
ONT	90	LongGF	102	5	3	456	0.01	0.62	0.02	strict_AP
ONT	90	LongGF	103	4	2	457	0.01	0.67	0.02	strict_AP
ONT	90	LongGF	104	4	1	457	0.01	0.8	0.02	strict_AP
ONT	90	LongGF	105	2	1	459	0	0.67	0	strict_AP
ONT	90	LongGF	106	1	1	460	0	0.5	0	strict_AP
ONT	90	LongGF	108	0	1	461	0	0	NA	strict_AP
ONT	90	ctat-LR-fusion	1	424	1	37	0.92	1	0.958	strict_AP
ONT	90	ctat-LR-fusion	2	362	0	99	0.79	1	0.883	strict_AP
ONT	90	ctat-LR-fusion	3	313	0	148	0.68	1	0.81	strict_AP
ONT	90	ctat-LR-fusion	4	288	0	173	0.62	1	0.765	strict_AP
ONT	90	ctat-LR-fusion	5	277	0	184	0.6	1	0.75	strict_AP
ONT	90	ctat-LR-fusion	6	270	0	191	0.59	1	0.742	strict_AP
ONT	90	ctat-LR-fusion	7	262	0	199	0.57	1	0.726	strict_AP
ONT	90	ctat-LR-fusion	8	247	0	214	0.54	1	0.701	strict_AP
ONT	90	ctat-LR-fusion	9	231	0	230	0.5	1	0.667	strict_AP
ONT	90	ctat-LR-fusion	10	222	0	239	0.48	1	0.649	strict_AP
ONT	90	ctat-LR-fusion	11	213	0	248	0.46	1	0.63	strict_AP
ONT	90	ctat-LR-fusion	12	208	0	253	0.45	1	0.621	strict_AP
ONT	90	ctat-LR-fusion	13	199	0	262	0.43	1	0.601	strict_AP
ONT	90	ctat-LR-fusion	14	196	0	265	0.43	1	0.601	strict_AP
ONT	90	ctat-LR-fusion	15	193	0	268	0.42	1	0.592	strict_AP
ONT	90	ctat-LR-fusion	16	192	0	269	0.42	1	0.592	strict_AP
ONT	90	ctat-LR-fusion	18	189	0	272	0.41	1	0.582	strict_AP
ONT	90	ctat-LR-fusion	19	188	0	273	0.41	1	0.582	strict_AP
ONT	90	ctat-LR-fusion	20	184	0	277	0.4	1	0.571	strict_AP
ONT	90	ctat-LR-fusion	21	183	0	278	0.4	1	0.571	strict_AP
ONT	90	ctat-LR-fusion	22	182	0	279	0.39	1	0.561	strict_AP
ONT	90	ctat-LR-fusion	23	180	0	281	0.39	1	0.561	strict_AP
ONT	90	ctat-LR-fusion	25	179	0	282	0.39	1	0.561	strict_AP
ONT	90	ctat-LR-fusion	27	178	0	283	0.39	1	0.561	strict_AP
ONT	90	ctat-LR-fusion	28	177	0	284	0.38	1	0.551	strict_AP
ONT	90	ctat-LR-fusion	29	175	0	286	0.38	1	0.551	strict_AP
ONT	90	ctat-LR-fusion	30	173	0	288	0.38	1	0.551	strict_AP
ONT	90	ctat-LR-fusion	31	170	0	291	0.37	1	0.54	strict_AP
ONT	90	ctat-LR-fusion	33	167	0	294	0.36	1	0.529	strict_AP
ONT	90	ctat-LR-fusion	34	165	0	296	0.36	1	0.529	strict_AP
ONT	90	ctat-LR-fusion	35	163	0	298	0.35	1	0.519	strict_AP
ONT	90	ctat-LR-fusion	36	162	0	299	0.35	1	0.519	strict_AP
ONT	90	ctat-LR-fusion	37	160	0	301	0.35	1	0.519	strict_AP
ONT	90	ctat-LR-fusion	38	156	0	305	0.34	1	0.507	strict_AP
ONT	90	ctat-LR-fusion	39	155	0	306	0.34	1	0.507	strict_AP
ONT	90	ctat-LR-fusion	40	152	0	309	0.33	1	0.496	strict_AP
ONT	90	ctat-LR-fusion	41	148	0	313	0.32	1	0.485	strict_AP
ONT	90	ctat-LR-fusion	42	144	0	317	0.31	1	0.473	strict_AP
ONT	90	ctat-LR-fusion	43	140	0	321	0.3	1	0.462	strict_AP
ONT	90	ctat-LR-fusion	44	136	0	325	0.3	1	0.462	strict_AP
ONT	90	ctat-LR-fusion	45	129	0	332	0.28	1	0.438	strict_AP
ONT	90	ctat-LR-fusion	46	124	0	337	0.27	1	0.425	strict_AP
ONT	90	ctat-LR-fusion	47	119	0	342	0.26	1	0.413	strict_AP
ONT	90	ctat-LR-fusion	48	114	0	347	0.25	1	0.4	strict_AP
ONT	90	ctat-LR-fusion	49	111	0	350	0.24	1	0.387	strict_AP
ONT	90	ctat-LR-fusion	50	106	0	355	0.23	1	0.374	strict_AP
ONT	90	ctat-LR-fusion	51	101	0	360	0.22	1	0.361	strict_AP
ONT	90	ctat-LR-fusion	52	98	0	363	0.21	1	0.347	strict_AP
ONT	90	ctat-LR-fusion	53	92	0	369	0.2	1	0.333	strict_AP
ONT	90	ctat-LR-fusion	54	91	0	370	0.2	1	0.333	strict_AP
ONT	90	ctat-LR-fusion	56	89	0	372	0.19	1	0.319	strict_AP
ONT	90	ctat-LR-fusion	57	87	0	374	0.19	1	0.319	strict_AP
ONT	90	ctat-LR-fusion	58	85	0	376	0.18	1	0.305	strict_AP
ONT	90	ctat-LR-fusion	59	83	0	378	0.18	1	0.305	strict_AP
ONT	90	ctat-LR-fusion	60	82	0	379	0.18	1	0.305	strict_AP
ONT	90	ctat-LR-fusion	61	79	0	382	0.17	1	0.291	strict_AP
ONT	90	ctat-LR-fusion	62	77	0	384	0.17	1	0.291	strict_AP
ONT	90	ctat-LR-fusion	66	75	0	386	0.16	1	0.276	strict_AP
ONT	90	ctat-LR-fusion	68	74	0	387	0.16	1	0.276	strict_AP
ONT	90	ctat-LR-fusion	71	73	0	388	0.16	1	0.276	strict_AP
ONT	90	ctat-LR-fusion	74	68	0	393	0.15	1	0.261	strict_AP
ONT	90	ctat-LR-fusion	75	67	0	394	0.15	1	0.261	strict_AP
ONT	90	ctat-LR-fusion	76	66	0	395	0.14	1	0.246	strict_AP
ONT	90	ctat-LR-fusion	77	61	0	400	0.13	1	0.23	strict_AP
ONT	90	ctat-LR-fusion	78	56	0	405	0.12	1	0.214	strict_AP
ONT	90	ctat-LR-fusion	79	55	0	406	0.12	1	0.214	strict_AP
ONT	90	ctat-LR-fusion	80	53	0	408	0.11	1	0.198	strict_AP
ONT	90	ctat-LR-fusion	81	50	0	411	0.11	1	0.198	strict_AP
ONT	90	ctat-LR-fusion	82	49	0	412	0.11	1	0.198	strict_AP
ONT	90	ctat-LR-fusion	83	45	0	416	0.1	1	0.182	strict_AP
ONT	90	ctat-LR-fusion	84	43	0	418	0.09	1	0.165	strict_AP
ONT	90	ctat-LR-fusion	85	41	0	420	0.09	1	0.165	strict_AP
ONT	90	ctat-LR-fusion	86	39	0	422	0.08	1	0.148	strict_AP
ONT	90	ctat-LR-fusion	87	38	0	423	0.08	1	0.148	strict_AP
ONT	90	ctat-LR-fusion	88	36	0	425	0.08	1	0.148	strict_AP
ONT	90	ctat-LR-fusion	89	34	0	427	0.07	1	0.131	strict_AP
ONT	90	ctat-LR-fusion	91	32	0	429	0.07	1	0.131	strict_AP
ONT	90	ctat-LR-fusion	92	30	0	431	0.07	1	0.131	strict_AP
ONT	90	ctat-LR-fusion	93	28	0	433	0.06	1	0.113	strict_AP
ONT	90	ctat-LR-fusion	94	23	0	438	0.05	1	0.095	strict_AP
ONT	90	ctat-LR-fusion	96	21	0	440	0.05	1	0.095	strict_AP
ONT	90	ctat-LR-fusion	97	19	0	442	0.04	1	0.077	strict_AP
ONT	90	ctat-LR-fusion	99	14	0	447	0.03	1	0.058	strict_AP
ONT	90	ctat-LR-fusion	100	13	0	448	0.03	1	0.058	strict_AP
ONT	90	ctat-LR-fusion	101	11	0	450	0.02	1	0.039	strict_AP
ONT	90	ctat-LR-fusion	102	9	0	452	0.02	1	0.039	strict_AP
ONT	90	ctat-LR-fusion	103	7	0	454	0.02	1	0.039	strict_AP
ONT	90	ctat-LR-fusion	104	5	0	456	0.01	1	0.02	strict_AP
ONT	90	ctat-LR-fusion	105	4	0	457	0.01	1	0.02	strict_AP
ONT	90	ctat-LR-fusion	106	3	0	458	0.01	1	0.02	strict_AP
ONT	90	ctat-LR-fusion	107	1	0	460	0	1	0	strict_AP
ONT	90	JAFFAL	1	393	7	68	0.85	0.98	0.91	strict_AP
ONT	90	JAFFAL	2	350	5	111	0.76	0.99	0.86	strict_AP
ONT	90	JAFFAL	3	303	5	158	0.66	0.98	0.789	strict_AP
ONT	90	JAFFAL	4	281	3	180	0.61	0.99	0.755	strict_AP
ONT	90	JAFFAL	5	267	0	194	0.58	1	0.734	strict_AP
ONT	90	JAFFAL	6	256	0	205	0.56	1	0.718	strict_AP
ONT	90	JAFFAL	7	250	0	211	0.54	1	0.701	strict_AP
ONT	90	JAFFAL	8	240	0	221	0.52	1	0.684	strict_AP
ONT	90	JAFFAL	9	227	0	234	0.49	1	0.658	strict_AP
ONT	90	JAFFAL	10	213	0	248	0.46	1	0.63	strict_AP
ONT	90	JAFFAL	11	204	0	257	0.44	1	0.611	strict_AP
ONT	90	JAFFAL	12	198	0	263	0.43	1	0.601	strict_AP
ONT	90	JAFFAL	13	195	0	266	0.42	1	0.592	strict_AP
ONT	90	JAFFAL	14	193	0	268	0.42	1	0.592	strict_AP
ONT	90	JAFFAL	15	192	0	269	0.42	1	0.592	strict_AP
ONT	90	JAFFAL	16	191	0	270	0.41	1	0.582	strict_AP
ONT	90	JAFFAL	17	189	0	272	0.41	1	0.582	strict_AP
ONT	90	JAFFAL	18	185	0	276	0.4	1	0.571	strict_AP
ONT	90	JAFFAL	19	184	0	277	0.4	1	0.571	strict_AP
ONT	90	JAFFAL	21	181	0	280	0.39	1	0.561	strict_AP
ONT	90	JAFFAL	22	180	0	281	0.39	1	0.561	strict_AP
ONT	90	JAFFAL	23	177	0	284	0.38	1	0.551	strict_AP
ONT	90	JAFFAL	24	174	0	287	0.38	1	0.551	strict_AP
ONT	90	JAFFAL	25	173	0	288	0.38	1	0.551	strict_AP
ONT	90	JAFFAL	26	171	0	290	0.37	1	0.54	strict_AP
ONT	90	JAFFAL	27	169	0	292	0.37	1	0.54	strict_AP
ONT	90	JAFFAL	28	166	0	295	0.36	1	0.529	strict_AP
ONT	90	JAFFAL	29	163	0	298	0.35	1	0.519	strict_AP
ONT	90	JAFFAL	30	160	0	301	0.35	1	0.519	strict_AP
ONT	90	JAFFAL	31	156	0	305	0.34	1	0.507	strict_AP
ONT	90	JAFFAL	32	152	0	309	0.33	1	0.496	strict_AP
ONT	90	JAFFAL	33	150	0	311	0.33	1	0.496	strict_AP
ONT	90	JAFFAL	34	147	0	314	0.32	1	0.485	strict_AP
ONT	90	JAFFAL	35	144	0	317	0.31	1	0.473	strict_AP
ONT	90	JAFFAL	36	139	0	322	0.3	1	0.462	strict_AP
ONT	90	JAFFAL	37	138	0	323	0.3	1	0.462	strict_AP
ONT	90	JAFFAL	38	132	0	329	0.29	1	0.45	strict_AP
ONT	90	JAFFAL	39	127	0	334	0.28	1	0.438	strict_AP
ONT	90	JAFFAL	40	123	0	338	0.27	1	0.425	strict_AP
ONT	90	JAFFAL	41	120	0	341	0.26	1	0.413	strict_AP
ONT	90	JAFFAL	42	116	0	345	0.25	1	0.4	strict_AP
ONT	90	JAFFAL	43	111	0	350	0.24	1	0.387	strict_AP
ONT	90	JAFFAL	44	108	0	353	0.23	1	0.374	strict_AP
ONT	90	JAFFAL	45	104	0	357	0.23	1	0.374	strict_AP
ONT	90	JAFFAL	46	99	0	362	0.21	1	0.347	strict_AP
ONT	90	JAFFAL	48	97	0	364	0.21	1	0.347	strict_AP
ONT	90	JAFFAL	49	93	0	368	0.2	1	0.333	strict_AP
ONT	90	JAFFAL	50	90	0	371	0.2	1	0.333	strict_AP
ONT	90	JAFFAL	51	86	0	375	0.19	1	0.319	strict_AP
ONT	90	JAFFAL	52	84	0	377	0.18	1	0.305	strict_AP
ONT	90	JAFFAL	53	78	0	383	0.17	1	0.291	strict_AP
ONT	90	JAFFAL	54	76	0	385	0.16	1	0.276	strict_AP
ONT	90	JAFFAL	57	75	0	386	0.16	1	0.276	strict_AP
ONT	90	JAFFAL	58	73	0	388	0.16	1	0.276	strict_AP
ONT	90	JAFFAL	59	72	0	389	0.16	1	0.276	strict_AP
ONT	90	JAFFAL	60	70	0	391	0.15	1	0.261	strict_AP
ONT	90	JAFFAL	62	69	0	392	0.15	1	0.261	strict_AP
ONT	90	JAFFAL	63	63	0	398	0.14	1	0.246	strict_AP
ONT	90	JAFFAL	64	61	0	400	0.13	1	0.23	strict_AP
ONT	90	JAFFAL	65	58	0	403	0.13	1	0.23	strict_AP
ONT	90	JAFFAL	66	57	0	404	0.12	1	0.214	strict_AP
ONT	90	JAFFAL	67	55	0	406	0.12	1	0.214	strict_AP
ONT	90	JAFFAL	68	54	0	407	0.12	1	0.214	strict_AP
ONT	90	JAFFAL	69	53	0	408	0.11	1	0.198	strict_AP
ONT	90	JAFFAL	70	50	0	411	0.11	1	0.198	strict_AP
ONT	90	JAFFAL	71	48	0	413	0.1	1	0.182	strict_AP
ONT	90	JAFFAL	72	46	0	415	0.1	1	0.182	strict_AP
ONT	90	JAFFAL	73	44	0	417	0.1	1	0.182	strict_AP
ONT	90	JAFFAL	74	42	0	419	0.09	1	0.165	strict_AP
ONT	90	JAFFAL	75	38	0	423	0.08	1	0.148	strict_AP
ONT	90	JAFFAL	76	36	0	425	0.08	1	0.148	strict_AP
ONT	90	JAFFAL	77	34	0	427	0.07	1	0.131	strict_AP
ONT	90	JAFFAL	78	32	0	429	0.07	1	0.131	strict_AP
ONT	90	JAFFAL	79	28	0	433	0.06	1	0.113	strict_AP
ONT	90	JAFFAL	80	26	0	435	0.06	1	0.113	strict_AP
ONT	90	JAFFAL	81	25	0	436	0.05	1	0.095	strict_AP
ONT	90	JAFFAL	82	22	0	439	0.05	1	0.095	strict_AP
ONT	90	JAFFAL	83	19	0	442	0.04	1	0.077	strict_AP
ONT	90	JAFFAL	84	18	0	443	0.04	1	0.077	strict_AP
ONT	90	JAFFAL	85	16	0	445	0.03	1	0.058	strict_AP
ONT	90	JAFFAL	88	15	0	446	0.03	1	0.058	strict_AP
ONT	90	JAFFAL	90	13	0	448	0.03	1	0.058	strict_AP
ONT	90	JAFFAL	92	9	0	452	0.02	1	0.039	strict_AP
ONT	90	JAFFAL	93	8	0	453	0.02	1	0.039	strict_AP
ONT	90	JAFFAL	94	6	0	455	0.01	1	0.02	strict_AP
ONT	90	JAFFAL	96	4	0	457	0.01	1	0.02	strict_AP
ONT	90	JAFFAL	97	3	0	458	0.01	1	0.02	strict_AP
ONT	90	JAFFAL	98	2	0	459	0	1	0	strict_AP
ONT	90	JAFFAL	100	1	0	460	0	1	0	strict_AP
ONT	90	fusionseeker	1	206	251	255	0.45	0.45	0.45	strict_AP
ONT	90	fusionseeker	2	171	204	290	0.37	0.46	0.41	strict_AP
ONT	90	fusionseeker	3	149	178	312	0.32	0.46	0.377	strict_AP
ONT	90	fusionseeker	4	138	161	323	0.3	0.46	0.363	strict_AP
ONT	90	fusionseeker	5	134	151	327	0.29	0.47	0.359	strict_AP
ONT	90	fusionseeker	6	129	145	332	0.28	0.47	0.351	strict_AP
ONT	90	fusionseeker	7	126	136	335	0.27	0.48	0.346	strict_AP
ONT	90	fusionseeker	8	118	131	343	0.26	0.47	0.335	strict_AP
ONT	90	fusionseeker	9	111	127	350	0.24	0.47	0.318	strict_AP
ONT	90	fusionseeker	10	107	119	354	0.23	0.47	0.309	strict_AP
ONT	90	fusionseeker	11	102	114	359	0.22	0.47	0.3	strict_AP
ONT	90	fusionseeker	12	100	111	361	0.22	0.47	0.3	strict_AP
ONT	90	fusionseeker	13	97	108	364	0.21	0.47	0.29	strict_AP
ONT	90	fusionseeker	14	96	105	365	0.21	0.48	0.292	strict_AP
ONT	90	fusionseeker	16	93	105	368	0.2	0.47	0.281	strict_AP
ONT	90	fusionseeker	17	92	104	369	0.2	0.47	0.281	strict_AP
ONT	90	fusionseeker	19	91	104	370	0.2	0.47	0.281	strict_AP
ONT	90	fusionseeker	20	90	104	371	0.2	0.46	0.279	strict_AP
ONT	90	fusionseeker	21	90	103	371	0.2	0.47	0.281	strict_AP
ONT	90	fusionseeker	22	89	102	372	0.19	0.47	0.271	strict_AP
ONT	90	fusionseeker	23	88	101	373	0.19	0.47	0.271	strict_AP
ONT	90	fusionseeker	24	88	99	373	0.19	0.47	0.271	strict_AP
ONT	90	fusionseeker	25	88	98	373	0.19	0.47	0.271	strict_AP
ONT	90	fusionseeker	26	86	98	375	0.19	0.47	0.271	strict_AP
ONT	90	fusionseeker	27	86	97	375	0.19	0.47	0.271	strict_AP
ONT	90	fusionseeker	28	86	96	375	0.19	0.47	0.271	strict_AP
ONT	90	fusionseeker	30	85	94	376	0.18	0.47	0.26	strict_AP
ONT	90	fusionseeker	31	85	92	376	0.18	0.48	0.262	strict_AP
ONT	90	fusionseeker	33	82	91	379	0.18	0.47	0.26	strict_AP
ONT	90	fusionseeker	34	80	89	381	0.17	0.47	0.25	strict_AP
ONT	90	fusionseeker	35	79	87	382	0.17	0.48	0.251	strict_AP
ONT	90	fusionseeker	36	78	86	383	0.17	0.48	0.251	strict_AP
ONT	90	fusionseeker	37	75	85	386	0.16	0.47	0.239	strict_AP
ONT	90	fusionseeker	38	75	84	386	0.16	0.47	0.239	strict_AP
ONT	90	fusionseeker	39	74	81	387	0.16	0.48	0.24	strict_AP
ONT	90	fusionseeker	40	74	78	387	0.16	0.49	0.241	strict_AP
ONT	90	fusionseeker	41	72	78	389	0.16	0.48	0.24	strict_AP
ONT	90	fusionseeker	42	70	77	391	0.15	0.48	0.229	strict_AP
ONT	90	fusionseeker	43	68	75	393	0.15	0.48	0.229	strict_AP
ONT	90	fusionseeker	44	68	72	393	0.15	0.49	0.23	strict_AP
ONT	90	fusionseeker	45	65	71	396	0.14	0.48	0.217	strict_AP
ONT	90	fusionseeker	46	62	71	399	0.13	0.47	0.204	strict_AP
ONT	90	fusionseeker	47	60	70	401	0.13	0.46	0.203	strict_AP
ONT	90	fusionseeker	48	58	66	403	0.13	0.47	0.204	strict_AP
ONT	90	fusionseeker	49	58	65	403	0.13	0.47	0.204	strict_AP
ONT	90	fusionseeker	50	54	62	407	0.12	0.47	0.191	strict_AP
ONT	90	fusionseeker	51	51	60	410	0.11	0.46	0.178	strict_AP
ONT	90	fusionseeker	52	49	57	412	0.11	0.46	0.178	strict_AP
ONT	90	fusionseeker	53	48	53	413	0.1	0.48	0.166	strict_AP
ONT	90	fusionseeker	54	48	52	413	0.1	0.48	0.166	strict_AP
ONT	90	fusionseeker	56	45	49	416	0.1	0.48	0.166	strict_AP
ONT	90	fusionseeker	57	45	48	416	0.1	0.48	0.166	strict_AP
ONT	90	fusionseeker	58	44	48	417	0.1	0.48	0.166	strict_AP
ONT	90	fusionseeker	59	44	47	417	0.1	0.48	0.166	strict_AP
ONT	90	fusionseeker	60	44	46	417	0.1	0.49	0.166	strict_AP
ONT	90	fusionseeker	62	43	44	418	0.09	0.49	0.152	strict_AP
ONT	90	fusionseeker	63	42	44	419	0.09	0.49	0.152	strict_AP
ONT	90	fusionseeker	64	42	43	419	0.09	0.49	0.152	strict_AP
ONT	90	fusionseeker	65	41	42	420	0.09	0.49	0.152	strict_AP
ONT	90	fusionseeker	68	39	41	422	0.08	0.49	0.138	strict_AP
ONT	90	fusionseeker	69	39	40	422	0.08	0.49	0.138	strict_AP
ONT	90	fusionseeker	70	38	40	423	0.08	0.49	0.138	strict_AP
ONT	90	fusionseeker	71	35	40	426	0.08	0.47	0.137	strict_AP
ONT	90	fusionseeker	72	34	38	427	0.07	0.47	0.122	strict_AP
ONT	90	fusionseeker	75	33	37	428	0.07	0.47	0.122	strict_AP
ONT	90	fusionseeker	77	33	34	428	0.07	0.49	0.122	strict_AP
ONT	90	fusionseeker	78	32	33	429	0.07	0.49	0.122	strict_AP
ONT	90	fusionseeker	79	31	31	430	0.07	0.5	0.123	strict_AP
ONT	90	fusionseeker	80	31	30	430	0.07	0.51	0.123	strict_AP
ONT	90	fusionseeker	81	30	30	431	0.07	0.5	0.123	strict_AP
ONT	90	fusionseeker	82	28	27	433	0.06	0.51	0.107	strict_AP
ONT	90	fusionseeker	83	27	26	434	0.06	0.51	0.107	strict_AP
ONT	90	fusionseeker	84	24	26	437	0.05	0.48	0.091	strict_AP
ONT	90	fusionseeker	85	23	24	438	0.05	0.49	0.091	strict_AP
ONT	90	fusionseeker	86	23	23	438	0.05	0.5	0.091	strict_AP
[truncated: 4,481 more rows]
