# Supplementary material for: Accurate fusion transcript identification from long- and short-read isoform sequencing at bulk or single-cell resolution
Source: Genome Res. 2025 Apr;35(4):967–86. doi: 10.1101/gr.279200.124 (PMC12047241; doi:10.1101/gr.279200.124)
Supplement: Supplement 4 [file Supplemental_Table_S3.xlsx]

## Sheet: Table_S3-DepMap.9cellLines.fus
# Table S3: Fusion predictions for nine DepMap cell lines according to prediction method, breakpoint, and number of long fusion reads reported as evidence
sample	prog	fusion	breakpoint	num_reads
HCC1395	ctat-LR-fusion	PDIA5--CH507-513H4.1	chr3:123124343--chr21:8222961	140
HCC1395	ctat-LR-fusion	EIF3K--CYP39A1	chr19:38632678--chr6:46639668	54
HCC1395	ctat-LR-fusion	PRRC2B--FUBP3	chr9:131394263--chr9:130609954	46
HCC1395	ctat-LR-fusion	PLA2R1--RBMS1	chr2:159976068--chr2:160303487	40
HCC1395	ctat-LR-fusion	RAB7A--LRCH3	chr3:128726359--chr3:197865423	26
HCC1395	ctat-LR-fusion	TMEM104--RAB37	chr17:74795632--chr17:74729256	19
HCC1395	ctat-LR-fusion	HELZ--HMGB1P7	chr17:67239356--chr10:31912970	18
HCC1395	ctat-LR-fusion	TBC1D16--AC012354.6	chr17:80010160--chr2:44966418	12
HCC1395	ctat-LR-fusion	PRR16--CTD-2334D19.1	chr5:120464645--chr5:120789954	12
HCC1395	ctat-LR-fusion	MFSD3--MROH1	chr8:144510903--chr8:144199122	11
HCC1395	ctat-LR-fusion	ST3GAL4--RP11-115C10.1	chr11:126440383--chr11:126652781	11
HCC1395	ctat-LR-fusion	RP11-96H19.1--RP11-446N19.1	chr12:46387972--chr12:46652390	11
HCC1395	ctat-LR-fusion	UNC5C--RP11-681L8.1	chr4:95278259--chr4:97392728	10
HCC1395	ctat-LR-fusion	ST3GAL4--FAM118B	chr11:126355842--chr11:126250506	10
HCC1395	ctat-LR-fusion	ST3GAL4--RP11-115C10.1	chr11:126409411--chr11:126652781	9
HCC1395	ctat-LR-fusion	SLMAP--AC017104.4	chr3:57757849--chr2:231437469	9
HCC1395	ctat-LR-fusion	EIF3K--CYP39A1	chr19:38632678--chr6:46639608	9
HCC1395	ctat-LR-fusion	E2F3--PKD2	chr6:20403832--chr4:88036220	8
HCC1395	ctat-LR-fusion	MDH1--LINC01278	chr2:63599292--chrX:63399903	8
HCC1395	ctat-LR-fusion	TBC1D16--AC012354.6	chr17:80010125--chr2:44966418	7
HCC1395	ctat-LR-fusion	RP11-661P17.1--SLCO3A1	chr15:91473316--chr15:91915993	6
HCC1395	ctat-LR-fusion	RAB7A--LRCH3	chr3:128726359--chr3:197870160	6
HCC1395	ctat-LR-fusion	CTD-2337A12.1--CAST	chr5:96379652--chr5:96675539	6
HCC1395	ctat-LR-fusion	AL139099.3--IFI6	chr14:49586810--chr1:27666254	6
HCC1395	ctat-LR-fusion	TBC1D16--AC012354.6	chr17:80010160--chr2:44967696	5
HCC1395	ctat-LR-fusion	PRR16--CTD-2334D19.1	chr5:120686847--chr5:120789954	5
HCC1395	ctat-LR-fusion	OSBPL9--RP11-191G24.1	chr1:51714079--chr1:51560882	5
HCC1395	ctat-LR-fusion	FOSL2--BRE	chr2:28393822--chr2:28237202	5
HCC1395	ctat-LR-fusion	AL139099.3--LRRC75A-AS1	chr14:49586788--chr17:16441714	4
HCC1395	ctat-LR-fusion	DUXAP10--RP11-536C10.17	chr14:19062466--chr14:18614389	3
HCC1395	ctat-LR-fusion	AL139099.3--LRRC75A-AS1	chr14:49586803--chr17:16441688	3
HCC1395	ctat-LR-fusion	AL139099.3--TP53	chr14:49586772--chr17:7668799	3
HCC1395	ctat-LR-fusion	E2F3--PKD2	chr6:20403832--chr4:88036136	3
HCC1395	ctat-LR-fusion	AL139099.3--IFI6	chr14:49586813--chr1:27666250	3
HCC1395	ctat-LR-fusion	LMF1--FOXK2	chr16:970788--chr17:82601303	3
HCC1395	ctat-LR-fusion	OSBPL9--CCDC178	chr1:51669512--chr18:32974681	3
HCC1395	ctat-LR-fusion	RN7SL1--TP53	chr14:49586772--chr17:7668799	3
HCC1395	ctat-LR-fusion	TAPBP--PINK1-AS	chr6:33313277--chr1:20651871	3
HCC1395	ctat-LR-fusion	LINC01296--LA16c-60G3.6	chr14:19337580--chr22:15541437	3
HCC1395	ctat-LR-fusion	FOSL2--BRE	chr2:28395776--chr2:28237202	2
HCC1395	ctat-LR-fusion	MTURN--PRDX5	chr7:30157512--chr11:64321586	2
HCC1395	ctat-LR-fusion	LINC00472--OGFRL1	chr6:71416410--chr6:71301386	2
HCC1395	ctat-LR-fusion	HCG27--MAP4K4	chr6:31204110--chr2:101885187	2
HCC1395	ctat-LR-fusion	H3F3A--GSTP1	chr1:226062811--chr11:67584134	2
HCC1395	ctat-LR-fusion	GSKIP--RP11-661P17.1	chr14:96363568--chr15:91473221	2
HCC1395	ctat-LR-fusion	GORASP1--RPL5	chr3:39103473--chr1:92840551	2
HCC1395	ctat-LR-fusion	FBXW11--NPM1	chr5:172006458--chr5:171405302	2
HCC1395	ctat-LR-fusion	CTD-2033A16.3--HSPB1	chr16:69727175--chr7:76303807	2
HCC1395	ctat-LR-fusion	EDC4--RPL14	chr16:67879774--chr3:40462048	2
HCC1395	ctat-LR-fusion	E2F3--PKD2	chr6:20403836--chr4:88036196	2
HCC1395	ctat-LR-fusion	CTD-2006C1.2--GLRX3	chr19:12001822--chr10:130145211	2
HCC1395	ctat-LR-fusion	C19orf70--PDLIM7	chr19:5679586--chr5:177491146	2
HCC1395	ctat-LR-fusion	AL139099.3--TP53	chr14:49586748--chr17:7668693	2
HCC1395	ctat-LR-fusion	AL139099.3--TP53	chr14:49586825--chr17:7668811	2
HCC1395	ctat-LR-fusion	NAMPT--CTB-111H14.1	chr7:106261588--chr7:106491130	2
HCC1395	ctat-LR-fusion	AL139099.3--LRRC75A-AS1	chr14:49586788--chr17:16441707	2
HCC1395	ctat-LR-fusion	FAM86DP--CYB5B	chr3:75432794--chr16:69462508	2
HCC1395	ctat-LR-fusion	P3H2-AS1--MRPL20	chr3:190129075--chr1:1405886	2
HCC1395	ctat-LR-fusion	PROSC--PVR	chr8:37766355--chr19:44661292	2
HCC1395	ctat-LR-fusion	PAPPA-AS2--MTG1	chr9:116288676--chr10:133398435	2
HCC1395	ctat-LR-fusion	PAIP2--MATR3	chr5:139341980--chr5:139321898	2
HCC1395	ctat-LR-fusion	UNC5C--STPG2	chr4:95278259--chr4:97241098	2
HCC1395	ctat-LR-fusion	TBC1D16--AC012354.6	chr17:80010125--chr2:44967696	2
HCC1395	ctat-LR-fusion	SS18--TPM4	chr18:26087542--chr19:16102323	2
HCC1395	ctat-LR-fusion	SMIM14--PITPNC1	chr4:39605071--chr17:67669508	2
HCC1395	ctat-LR-fusion	RPS15A--LAMB2	chr16:18788063--chr3:49128752	2
HCC1395	ctat-LR-fusion	RP5-908M14.9--CABLES2	chr20:62386539--chr20:62395014	2
HCC1395	ctat-LR-fusion	RP11-380O24.1--SRGAP3	chr3:9326010--chr3:9124917	2
HCC1395	ctat-LR-fusion	RP11-83A24.2--KCNQ5	chr4:139453685--chr6:73190573	2
HCC1395	ctat-LR-fusion	RNU6-4P--EEF1A1	chr3:181231845--chr6:73518465	2
HCC1395	ctat-LR-fusion	RNGTT--RPF1	chr6:88849755--chr1:84480956	2
HCC1395	ctat-LR-fusion	RN7SL2--PCBP2	chr14:49862742--chr12:53462534	2
HCC1395	ctat-LR-fusion	RN7SL1--TP53	chr14:49586825--chr17:7668811	2
HCC1395	ctat-LR-fusion	RN7SL1--TP53	chr14:49586748--chr17:7668693	2
HCC1395	ctat-LR-fusion	RN7SL1--CHMP1B	chr14:49586835--chr18:11853864	2
HCC1395	ctat-LR-fusion	PPAP2C--PHF20L1	chr19:287665--chr8:132777796	2
HCC1395	ctat-LR-fusion	PDAP1--EHMT2	chr7:99400343--chr6:31884799	2
HCC1395	ctat-LR-fusion	RORA--ANXA2	chr15:61229053--chr15:60364523	2
HCC1395	ctat-LR-fusion	ZYX--MAP2K3	chr7:143389977--chr17:21302143	1
HCC1395	ctat-LR-fusion	FOXRED1--CCT6A	chr11:126269291--chr7:56059544	1
HCC1395	ctat-LR-fusion	FOXP4-AS1--AC005537.2	chr6:41546000--chr7:42972848	1
HCC1395	ctat-LR-fusion	FOXP1--CD2AP	chr3:71581549--chr6:47624186	1
HCC1395	ctat-LR-fusion	FOPNL--SMIM2-AS1	chr16:15884008--chr13:44146782	1
HCC1395	ctat-LR-fusion	FNBP4--NUP160	chr11:47765270--chr11:47837623	1
HCC1395	ctat-LR-fusion	FN1--ERO1L	chr2:215397680--chr14:52658150	1
HCC1395	ctat-LR-fusion	FLNB--CIAPIN1	chr3:58105216--chr16:57429280	1
HCC1395	ctat-LR-fusion	FGGY--TMEM61	chr1:59554227--chr1:54991836	1
HCC1395	ctat-LR-fusion	FCHO2--ATP6V0B	chr5:73058524--chr1:43977981	1
HCC1395	ctat-LR-fusion	FUCA2--EP300	chr6:143507237--chr22:41146739	1
HCC1395	ctat-LR-fusion	FBXW8--FH	chr12:116988869--chr1:241508785	1
HCC1395	ctat-LR-fusion	FBXO32--PSMA1	chr8:123531898--chr11:14517981	1
HCC1395	ctat-LR-fusion	FBXL8--SNHG12	chr16:67161937--chr1:28579981	1
HCC1395	ctat-LR-fusion	FBXL8--PRKCSH	chr16:67161937--chr19:11450646	1
HCC1395	ctat-LR-fusion	FBXL2--PSMB1	chr3:33297725--chr6:170549113	1
HCC1395	ctat-LR-fusion	FAT1--DCTD	chr4:186726354--chr4:182915575	1
HCC1395	ctat-LR-fusion	FARSA--C19orf53	chr19:12933550--chr19:13778052	1
HCC1395	ctat-LR-fusion	FARS2--WRNIP1	chr6:5261660--chr6:2768691	1
HCC1395	ctat-LR-fusion	FAM81A--CCNB2	chr15:59438282--chr15:59123517	1
HCC1395	ctat-LR-fusion	FAM49B--ITPR1	chr8:129903312--chr3:4775242	1
HCC1395	ctat-LR-fusion	FBXW11--PYROXD1	chr5:172006458--chr12:21461025	1
HCC1395	ctat-LR-fusion	FAM222B--DEPTOR	chr17:28834293--chr8:119965232	1
HCC1395	ctat-LR-fusion	FUS--EEF1D	chr16:31185179--chr8:143586852	1
HCC1395	ctat-LR-fusion	G3BP1--MAPK9	chr5:151772036--chr5:180280608	1
HCC1395	ctat-LR-fusion	GPR158--DHRS3	chr10:25466719--chr1:12579412	1
HCC1395	ctat-LR-fusion	GPATCH8--TNNT1	chr17:44503326--chr19:55140960	1
HCC1395	ctat-LR-fusion	GOT1--C1orf27	chr10:99430448--chr1:186406083	1
HCC1395	ctat-LR-fusion	GOPC--ACTR3B	chr6:117602004--chr7:152852126	1
HCC1395	ctat-LR-fusion	GOLGA4--NDUFA7	chr3:37251484--chr19:8320906	1
HCC1395	ctat-LR-fusion	GOLGA3--PTOV1	chr12:132795852--chr19:49854406	1
HCC1395	ctat-LR-fusion	GNL3--DNAJC14	chr3:52691071--chr12:55828714	1
HCC1395	ctat-LR-fusion	GNAI3--MIB1	chr1:109548838--chr18:21803907	1
HCC1395	ctat-LR-fusion	GMPS--MBNL1	chr3:155870897--chr3:152414941	1
HCC1395	ctat-LR-fusion	G2E3--KTN1	chr14:30559272--chr14:55612019	1
HCC1395	ctat-LR-fusion	GMEB2--NDUFB2	chr20:63619267--chr7:140702866	1
HCC1395	ctat-LR-fusion	GLS--EXT1	chr2:190895725--chr8:117837201	1
HCC1395	ctat-LR-fusion	GLI3--H2AFV	chr7:42023468--chr7:44843354	1
HCC1395	ctat-LR-fusion	GLI3--FNBP1L	chr7:42223130--chr1:93499468	1
HCC1395	ctat-LR-fusion	GCNT2--NKTR	chr6:10529836--chr3:42634613	1
HCC1395	ctat-LR-fusion	GCN1L1--DYNLL1-AS1	chr12:120170169--chr12:120492110	1
HCC1395	ctat-LR-fusion	GCLM--ABCA4	chr1:93896618--chr1:94021409	1
HCC1395	ctat-LR-fusion	GAPVD1--CAPN1	chr9:125261959--chr11:65204683	1
HCC1395	ctat-LR-fusion	GALNS--TUBB3	chr16:88856758--chr16:89932571	1
HCC1395	ctat-LR-fusion	GABARAPL2--NDUFB7	chr16:75566907--chr19:14566933	1
HCC1395	ctat-LR-fusion	GLUD1P3--CAAP1	chr10:73730873--chr9:26887513	1
HCC1395	ctat-LR-fusion	FAM220A--RPS21	chr7:6348573--chr20:62387321	1
HCC1395	ctat-LR-fusion	EZH2--CUL1	chr7:148884164--chr7:148729962	1
HCC1395	ctat-LR-fusion	EXOSC2--ZPLD1	chr9:130693913--chr3:102438480	1
HCC1395	ctat-LR-fusion	E2F3--PKD2	chr6:20402625--chr4:88036220	1
HCC1395	ctat-LR-fusion	DZIP1--NFYB	chr13:95643601--chr12:104135532	1
HCC1395	ctat-LR-fusion	DVL2--CNOT7	chr17:7234069--chr8:17237373	1
HCC1395	ctat-LR-fusion	DUXAP10--EEF1D	chr14:19062466--chr8:143586852	1
HCC1395	ctat-LR-fusion	DUSP11--FOXJ3	chr2:73774913--chr1:42227966	1
HCC1395	ctat-LR-fusion	DTNB--METTL21B	chr2:25607236--chr12:57773017	1
HCC1395	ctat-LR-fusion	DPY19L4--TTC39C	chr8:94739790--chr18:24131882	1
HCC1395	ctat-LR-fusion	DPM2--RPS2	chr9:127937434--chr16:1963256	1
HCC1395	ctat-LR-fusion	DPF1--VASP	chr19:38222357--chr19:45525946	1
HCC1395	ctat-LR-fusion	ECE1--C14orf93	chr1:21221747--chr14:22989845	1
HCC1395	ctat-LR-fusion	DOCK4--ZNF277	chr7:112206102--chr7:112318182	1
HCC1395	ctat-LR-fusion	DNAJC25--HSDL2	chr9:111631743--chr9:112454013	1
HCC1395	ctat-LR-fusion	DNAJC11--CAMTA1	chr1:6667709--chr1:6871757	1
HCC1395	ctat-LR-fusion	DNAJC10--NCKAP1	chr2:182717072--chr2:182930788	1
HCC1395	ctat-LR-fusion	DNAJB6--RPS27A	chr7:157385611--chr2:55232808	1
HCC1395	ctat-LR-fusion	DNAAF2--IPO13	chr14:49633287--chr1:43958746	1
HCC1395	ctat-LR-fusion	DLEU2--TTC3	chr13:50125302--chr21:37108392	1
HCC1395	ctat-LR-fusion	DLEU2--HMGB1	chr13:50068097--chr13:30463694	1
HCC1395	ctat-LR-fusion	DKC1--RPS2	chrX:154762981--chr16:1963256	1
HCC1395	ctat-LR-fusion	DIS3L2--PDE6D	chr2:231961765--chr2:231738138	1
HCC1395	ctat-LR-fusion	DNAJC3--DZIP1	chr13:95677337--chr13:95612177	1
HCC1395	ctat-LR-fusion	EDEM3--C12orf65	chr1:184694044--chr12:123256813	1
HCC1395	ctat-LR-fusion	EDIL3--RPS19	chr5:84229855--chr19:41869031	1
HCC1395	ctat-LR-fusion	EEFSEC--COL6A5	chr3:128153823--chr3:130484035	1
HCC1395	ctat-LR-fusion	EXOC4--NDUFB2	chr7:133275171--chr7:140702866	1
HCC1395	ctat-LR-fusion	ETNK1--WDR5	chr12:22661205--chr9:134139820	1
HCC1395	ctat-LR-fusion	ETNK1--RASSF8	chr12:22625586--chr12:25995037	1
HCC1395	ctat-LR-fusion	ERP29--LGMN	chr12:112013609--chr14:92706653	1
HCC1395	ctat-LR-fusion	ERICH1--LINC00511	chr8:692478--chr17:72401421	1
HCC1395	ctat-LR-fusion	ERICH1--BANF1	chr8:731140--chr11:66003235	1
HCC1395	ctat-LR-fusion	EPRS--C17orf75	chr1:220024264--chr17:32331978	1
HCC1395	ctat-LR-fusion	ENOX2--SF3B3	chrX:130901684--chr16:70535308	1
HCC1395	ctat-LR-fusion	ENC1--SRPK2	chr5:74640307--chr7:105169265	1
HCC1395	ctat-LR-fusion	EMC8--ERLIN1	chr16:85788974--chr10:100167406	1
HCC1395	ctat-LR-fusion	ELP2--SSR1	chr18:36138426--chr6:7310029	1
HCC1395	ctat-LR-fusion	ELP2--SLC39A6	chr18:36130071--chr18:36116779	1
HCC1395	ctat-LR-fusion	ELAC1--ME2	chr18:50974561--chr18:50895809	1
HCC1395	ctat-LR-fusion	EIF4E--NPIPB5	chr4:98901876--chr16:22532060	1
HCC1395	ctat-LR-fusion	EIF4A1--RPL13	chr17:7575258--chr16:89562884	1
HCC1395	ctat-LR-fusion	EIF3M--CTNND1	chr11:32601822--chr11:57801733	1
HCC1395	ctat-LR-fusion	EIF3H--ACSF3	chr8:116755666--chr16:89133136	1
HCC1395	ctat-LR-fusion	EIF3G--SDSL	chr19:10118668--chr12:113435329	1
HCC1395	ctat-LR-fusion	EIF2S2--CNPPD1	chr20:34112096--chr2:219176847	1
HCC1395	ctat-LR-fusion	EHMT1--AGPAT2	chr9:137711030--chr9:136677556	1
HCC1395	ctat-LR-fusion	EFTUD2--KIF18B	chr17:44864930--chr17:44929024	1
HCC1395	ctat-LR-fusion	GS1-124K5.2--RP11-147C23.1	chr7:66450071--chr1:96022533	1
HCC1395	ctat-LR-fusion	GTF2F2--FOXP1	chr13:45120721--chr3:71015653	1
HCC1395	ctat-LR-fusion	GTF3C1--RPS15A	chr16:27528598--chr16:18784823	1
HCC1395	ctat-LR-fusion	GUSBP1--CMC2	chr5:21461866--chr16:80976179	1
HCC1395	ctat-LR-fusion	LRRC75A-AS1--EBPL	chr17:16439414--chr13:49663195	1
HCC1395	ctat-LR-fusion	LRRC29--KANK1	chr16:67223826--chr9:539516	1
HCC1395	ctat-LR-fusion	LRP5--GPM6B	chr11:68403699--chrX:13785808	1
HCC1395	ctat-LR-fusion	LPCAT3--GAPDH	chr12:6981004--chr12:6536494	1
HCC1395	ctat-LR-fusion	LOH12CR1--RBFOX2	chr12:12361349--chr22:35765483	1
HCC1395	ctat-LR-fusion	LMBR1--NDUFS6	chr7:156892928--chr5:1814339	1
HCC1395	ctat-LR-fusion	LINC01138--GPR108	chr1:148435146--chr19:6735958	1
HCC1395	ctat-LR-fusion	LINC00601--FGF2	chr10:126416800--chr4:122876321	1
HCC1395	ctat-LR-fusion	LINC00601--ANXA2	chr10:126416800--chr15:60386086	1
HCC1395	ctat-LR-fusion	LRRFIP2--XPO6	chr3:37129063--chr16:28156527	1
HCC1395	ctat-LR-fusion	LINC00472--CHPF	chr6:71416410--chr2:219541125	1
HCC1395	ctat-LR-fusion	LINC-PINT--GMNN	chr7:130945720--chr6:24780663	1
HCC1395	ctat-LR-fusion	LGMN--RPL5	chr14:92717380--chr1:92836190	1
HCC1395	ctat-LR-fusion	LARP4--NFATC3	chr12:50454417--chr16:68166843	1
HCC1395	ctat-LR-fusion	LARGE--DHRSX	chr22:33761371--chrX:2243230	1
HCC1395	ctat-LR-fusion	L3HYPDH--IVNS1ABP	chr14:59475869--chr1:185305643	1
HCC1395	ctat-LR-fusion	KTN1--WDR70	chr14:55580354--chr5:37697655	1
HCC1395	ctat-LR-fusion	KTN1--FERMT2	chr14:55580354--chr14:52919356	1
HCC1395	ctat-LR-fusion	KRBOX4--TNNT1	chrX:46450475--chr19:55146707	1
HCC1395	ctat-LR-fusion	KPNA1--EEFSEC	chr3:122449574--chr3:128246836	1
HCC1395	ctat-LR-fusion	LINC00265--SQSTM1	chr7:39734044--chr5:179836436	1
HCC1395	ctat-LR-fusion	LSM14A--TAF1D	chr19:34172763--chr11:93732291	1
HCC1395	ctat-LR-fusion	LUC7L--E2F5	chr16:229279--chr8:85202147	1
HCC1395	ctat-LR-fusion	LYPLAL1--ADSS	chr1:219179246--chr1:244424387	1
HCC1395	ctat-LR-fusion	MKLN1-AS--CHCHD3	chr7:131327615--chr7:132885745	1
HCC1395	ctat-LR-fusion	MIR31HG--SCAPER	chr9:21559489--chr15:76665789	1
HCC1395	ctat-LR-fusion	MIR22HG--PYROXD2	chr17:1716130--chr10:98391082	1
HCC1395	ctat-LR-fusion	MIR143HG--FAXC	chr5:149424397--chr6:99349228	1
HCC1395	ctat-LR-fusion	MINOS1--CAPZB	chr1:19597109--chr1:19385626	1
HCC1395	ctat-LR-fusion	MIER1--WDR78	chr1:66926242--chr1:66905375	1
HCC1395	ctat-LR-fusion	MIER1--KTN1	chr1:66959743--chr14:55667241	1
HCC1395	ctat-LR-fusion	MIEF2--RP11-186B7.4	chr17:18263248--chr17:7575119	1
HCC1395	ctat-LR-fusion	MIEF2--EIF4A1	chr17:18263248--chr17:7575119	1
HCC1395	ctat-LR-fusion	MIEF1--KNTC1	chr22:39504534--chr12:122626205	1
HCC1395	ctat-LR-fusion	MFF--FARSB	chr2:227325427--chr2:222572022	1
HCC1395	ctat-LR-fusion	METTL16--GNRH1	chr17:2502204--chr8:25423331	1
HCC1395	ctat-LR-fusion	MED16--ACO2	chr19:893086--chr22:41522830	1
HCC1395	ctat-LR-fusion	MDH2--ZFAS1	chr7:76048226--chr20:49289045	1
HCC1395	ctat-LR-fusion	MCFD2--TPM4	chr2:46907810--chr19:16081913	1
HCC1395	ctat-LR-fusion	MCEE--CEP57L1	chr2:71124206--chr6:109145219	1
HCC1395	ctat-LR-fusion	MBTPS1--COTL1	chr16:84081747--chr16:84566955	1
HCC1395	ctat-LR-fusion	MBOAT2--KIDINS220	chr2:8974359--chr2:8751644	1
HCC1395	ctat-LR-fusion	MBOAT1--GMNN	chr6:20212136--chr6:24780663	1
HCC1395	ctat-LR-fusion	MAP4K3--HNRNPLL	chr2:39436892--chr2:38591648	1
HCC1395	ctat-LR-fusion	MAGED1--LINC00152	chrX:51894349--chr2:87521207	1
HCC1395	ctat-LR-fusion	KMT2E--SFPQ	chr7:105014535--chr1:35178036	1
HCC1395	ctat-LR-fusion	DICER1--TRA2B	chr14:95124196--chr3:185921187	1
HCC1395	ctat-LR-fusion	KLHL26--EEF1D	chr19:18664443--chr8:143586852	1
HCC1395	ctat-LR-fusion	KIAA1467--RP11-69E11.4	chr12:13071396--chr1:39529164	1
HCC1395	ctat-LR-fusion	HNRNPM--RPS27A	chr19:8455574--chr2:55234831	1
HCC1395	ctat-LR-fusion	HNRNPK--TPM1	chr9:83980503--chr15:63056985	1
HCC1395	ctat-LR-fusion	HNRNPC--HERC2	chr14:21269298--chr15:28321464	1
HCC1395	ctat-LR-fusion	HNRNPA2B1--TAX1BP1	chr7:26200572--chr7:27799965	1
HCC1395	ctat-LR-fusion	HNRNPA2B1--DNAJC10	chr7:26200572--chr2:182751658	1
HCC1395	ctat-LR-fusion	HNRNPA2B1--C9orf3	chr7:26200572--chr9:95086682	1
HCC1395	ctat-LR-fusion	HIVEP3--SMYD3	chr1:41864578--chr1:245764149	1
HCC1395	ctat-LR-fusion	HIVEP3--IFT43	chr1:41864578--chr14:75988885	1
HCC1395	ctat-LR-fusion	HIAT1--RPL27	chr1:100038316--chr17:43002673	1
HCC1395	ctat-LR-fusion	HPRT1--FGF13	chrX:134498684--chrX:138632986	1
HCC1395	ctat-LR-fusion	HGS--ACTG1	chr17:81690234--chr17:81512360	1
HCC1395	ctat-LR-fusion	HELZ--ARHGAP12	chr17:67239433--chr10:31826385	1
HCC1395	ctat-LR-fusion	HDLBP--ATP5J2	chr2:241315570--chr7:99460193	1
HCC1395	ctat-LR-fusion	HDHD2--MBD2	chr18:47150378--chr18:54166166	1
HCC1395	ctat-LR-fusion	HDHD2--DARS	chr18:47150378--chr2:135924498	1
HCC1395	ctat-LR-fusion	HDAC3--C3orf17	chr5:141629860--chr3:113008430	1
HCC1395	ctat-LR-fusion	HAUS7--PACSIN3	chrX:153469146--chr11:47183069	1
HCC1395	ctat-LR-fusion	H3F3A--RPL41	chr1:226062811--chr12:56116775	1
HCC1395	ctat-LR-fusion	H3F3A--CHAF1A	chr1:226062811--chr19:4405912	1
HCC1395	ctat-LR-fusion	GYS1--RPL30	chr19:48991302--chr8:98041850	1
HCC1395	ctat-LR-fusion	HELZ--PITPNC1	chr17:67239433--chr17:67532802	1
HCC1395	ctat-LR-fusion	HRH1--RPL3	chr3:11137399--chr22:39317629	1
HCC1395	ctat-LR-fusion	HS2ST1--LMO4	chr1:86915160--chr1:87339536	1
HCC1395	ctat-LR-fusion	HSDL1--TRAPPC9	chr16:84135544--chr8:139910300	1
HCC1395	ctat-LR-fusion	KIAA1191--CKAP5	chr5:176359481--chr11:46753497	1
HCC1395	ctat-LR-fusion	KIAA0319L--DPYD	chr1:35554350--chr1:97234994	1
HCC1395	ctat-LR-fusion	KIAA0195--CLPTM1L	chr17:75486426--chr5:1318453	1
HCC1395	ctat-LR-fusion	KDM7A--NDUFB2	chr7:140176744--chr7:140702866	1
HCC1395	ctat-LR-fusion	KDM4C--ZNF384	chr9:6793132--chr12:6688226	1
HCC1395	ctat-LR-fusion	KDM4C--SNHG7	chr9:6793132--chr9:136725110	1
HCC1395	ctat-LR-fusion	KATNAL1--HSPH1	chr13:30280063--chr13:31158863	1
HCC1395	ctat-LR-fusion	JKAMP--RPL30	chr14:59495087--chr8:98045399	1
HCC1395	ctat-LR-fusion	IVNS1ABP--ABCB10	chr1:185311095--chr1:229521635	1
HCC1395	ctat-LR-fusion	ITGB1--ZC3H15	chr10:32920245--chr2:186506713	1
HCC1395	ctat-LR-fusion	ITGB1--SEPT9	chr10:32958145--chr17:77402059	1
HCC1395	ctat-LR-fusion	ITFG1--LINC00342	chr16:47365788--chr2:95807302	1
HCC1395	ctat-LR-fusion	ITCH--RBM39	chr20:34369470--chr20:35725155	1
HCC1395	ctat-LR-fusion	INO80C--BANP	chr18:35497719--chr16:88072069	1
HCC1395	ctat-LR-fusion	IFT43--TARBP1	chr14:75988977--chr1:234472811	1
HCC1395	ctat-LR-fusion	IFNGR1--PEX7	chr6:137219243--chr6:136898142	1
HCC1395	ctat-LR-fusion	IFNAR2--STT3A	chr21:33252830--chr11:125620011	1
HCC1395	ctat-LR-fusion	IAH1--TMEM230	chr2:9476039--chr20:5109445	1
HCC1395	ctat-LR-fusion	HSPA9--KDM3B	chr5:138568925--chr5:138426975	1
HCC1395	ctat-LR-fusion	HSPA12A--ACTG1	chr10:116742430--chr17:81512360	1
HCC1395	ctat-LR-fusion	HSP90AB1--ARSA	chr6:44247195--chr22:50627792	1
HCC1395	ctat-LR-fusion	KIAA1524--MKI67	chr3:108589274--chr10:128119319	1
HCC1395	ctat-LR-fusion	MMP2--SERBP1	chr16:55483135--chr1:67424322	1
HCC1395	ctat-LR-fusion	DEPDC1B--ZSWIM6	chr5:60686962--chr5:61521263	1
HCC1395	ctat-LR-fusion	DENR--RNF10	chr12:122753807--chr12:120575631	1
HCC1395	ctat-LR-fusion	ARID3B--ANXA2	chr15:74541330--chr15:60386086	1
HCC1395	ctat-LR-fusion	ARHGEF18--NR3C1	chr19:7395247--chr5:143400852	1
HCC1395	ctat-LR-fusion	ARHGEF18--CALM1	chr19:7395247--chr14:90400065	1
HCC1395	ctat-LR-fusion	ARFIP1--DCLK2	chr4:152780226--chr4:150193138	1
HCC1395	ctat-LR-fusion	ARFGEF2--COTL1	chr20:48922010--chr16:84590262	1
HCC1395	ctat-LR-fusion	ARFGAP3--SPOCD1	chr22:42847514--chr1:31794235	1
HCC1395	ctat-LR-fusion	ARFGAP2--DDB2	chr11:47166268--chr11:47238800	1
HCC1395	ctat-LR-fusion	ARF3--GBF1	chr12:48957310--chr10:102370707	1
HCC1395	ctat-LR-fusion	APOPT1--TUFM	chr14:103587364--chr16:28844101	1
HCC1395	ctat-LR-fusion	ARID5B--TFAP4	chr10:61940408--chr16:4268081	1
HCC1395	ctat-LR-fusion	APOLD1--STAMBP	chr12:12726096--chr2:73870143	1
HCC1395	ctat-LR-fusion	APOL6--ASMTL	chr22:35648623--chrX:1432377	1
HCC1395	ctat-LR-fusion	APOL2--IFT27	chr22:36239441--chr22:36767862	1
HCC1395	ctat-LR-fusion	APOBEC3F--SLC3A2	chr22:39045220--chr11:62881893	1
HCC1395	ctat-LR-fusion	APLP2--ATP1B3	chr11:130070082--chr3:141903620	1
HCC1395	ctat-LR-fusion	APCDD1L-AS1--HN1	chr20:58515740--chr17:75136250	1
HCC1395	ctat-LR-fusion	APC--PRKRA	chr5:112755025--chr2:178436319	1
HCC1395	ctat-LR-fusion	AP3B1--PSPC1	chr5:78294452--chr13:19677823	1
HCC1395	ctat-LR-fusion	AP1M1--SCG5	chr19:16209177--chr15:32691710	1
HCC1395	ctat-LR-fusion	AP000487.5--WDR53	chr11:70398098--chr3:196554807	1
HCC1395	ctat-LR-fusion	APOLD1--HELLS	chr12:12726096--chr10:94588229	1
HCC1395	ctat-LR-fusion	AP000487.5--LINC01569	chr11:70398098--chr16:4247061	1
HCC1395	ctat-LR-fusion	ARIH2--RPL5	chr3:48922811--chr1:92836190	1
HCC1395	ctat-LR-fusion	ASB6--AIM1	chr9:129639202--chr6:106568472	1
HCC1395	ctat-LR-fusion	BBS9--BMPER	chr7:33534176--chr7:33906818	1
HCC1395	ctat-LR-fusion	BAZ1B--CTNNAL1	chr7:73489194--chr9:108944018	1
HCC1395	ctat-LR-fusion	BAHCC1--PPP6R2	chr17:81395635--chr22:50434966	1
HCC1395	ctat-LR-fusion	B4GALT1--NFX1	chr9:33166758--chr9:33294420	1
HCC1395	ctat-LR-fusion	B3GALNT2--CHD2	chr1:235494681--chr15:92924321	1
HCC1395	ctat-LR-fusion	AZIN1--EBF1	chr8:102858013--chr5:158731157	1
HCC1395	ctat-LR-fusion	AZI2--NGLY1	chr3:28348601--chr3:25751263	1
HCC1395	ctat-LR-fusion	AUH--PDE7A	chr9:91296021--chr8:65782843	1
HCC1395	ctat-LR-fusion	ATXN3--CAPN2	chr14:92093252--chr1:223759270	1
HCC1395	ctat-LR-fusion	ARPC2--TAX1BP3	chr2:218228850--chr17:3664798	1
HCC1395	ctat-LR-fusion	ATP5I--TBC1D14	chr4:673303--chr4:6994184	1
HCC1395	ctat-LR-fusion	ATP2B4--OSBPL9	chr1:203627219--chr1:51760690	1
HCC1395	ctat-LR-fusion	ATP2B4--MAP2K3	chr1:203727571--chr17:21312142	1
HCC1395	ctat-LR-fusion	ATP2B2--LINC00606	chr3:10534039--chr3:10761922	1
HCC1395	ctat-LR-fusion	ATG9A--TFR2	chr2:219217670--chr7:100632198	1
HCC1395	ctat-LR-fusion	ATG9A--HP1BP3	chr2:219225411--chr1:20773610	1
HCC1395	ctat-LR-fusion	ATF2--NAB1	chr2:175168050--chr2:190659158	1
HCC1395	ctat-LR-fusion	ASS1--SNHG3	chr9:130454373--chr1:28508128	1
HCC1395	ctat-LR-fusion	ASS1--RCC1	chr9:130454373--chr1:28508128	1
HCC1395	ctat-LR-fusion	ASPH--SRP9	chr8:61714269--chr1:225783300	1
HCC1395	ctat-LR-fusion	ATP5A1--NFYB	chr18:46104137--chr12:104135532	1
HCC1395	ctat-LR-fusion	AP000487.5--LDHB	chr11:70398098--chr12:21638470	1
HCC1395	ctat-LR-fusion	AP000487.5--KCMF1	chr11:70398098--chr2:85027889	1
HCC1395	ctat-LR-fusion	AP000487.5--DNAJB6	chr11:70398098--chr7:157409795	1
HCC1395	ctat-LR-fusion	ADAM10--SCG5	chr15:58717577--chr15:32691710	1
HCC1395	ctat-LR-fusion	ADAM10--MARK3	chr15:58621471--chr14:103491777	1
HCC1395	ctat-LR-fusion	ACVR1--UBXN2A	chr2:157875796--chr2:23958301	1
HCC1395	ctat-LR-fusion	ACTR3B--SYPL1	chr7:152825122--chr7:106099282	1
HCC1395	ctat-LR-fusion	ACTR3B--MTX2	chr7:152759926--chr2:176296860	1
HCC1395	ctat-LR-fusion	ACTN1--SIRT3	chr14:68978952--chr11:233215	1
HCC1395	ctat-LR-fusion	ACO2--MKI67	chr22:41515535--chr10:128119319	1
HCC1395	ctat-LR-fusion	ACAP2--PPP1R2	chr3:195442795--chr3:195519185	1
HCC1395	ctat-LR-fusion	AC104654.2--MAP4K3	chr2:41933276--chr2:39356339	1
HCC1395	ctat-LR-fusion	ADAM12--C10orf90	chr10:126388058--chr10:126464986	1
HCC1395	ctat-LR-fusion	AC087294.2--FASTKD1	chr17:21214450--chr2:169555255	1
HCC1395	ctat-LR-fusion	AC027612.6--EEF1B2	chr2:91655368--chr2:206161346	1
HCC1395	ctat-LR-fusion	AC009961.3--PPP6R3	chr2:159710717--chr11:68564303	1
HCC1395	ctat-LR-fusion	ABCC3--RPS12	chr17:50634981--chr6:132816461	1
HCC1395	ctat-LR-fusion	ABCC3--C12orf10	chr17:50664111--chr12:53306680	1
HCC1395	ctat-LR-fusion	ABCB8--UQCRH	chr7:151028987--chr1:46316552	1
HCC1395	ctat-LR-fusion	ABCB8--LA16c-312E8.2	chr7:151036649--chr16:1411929	1
HCC1395	ctat-LR-fusion	ABCB7--PGK1	chrX:75156105--chrX:78109867	1
HCC1395	ctat-LR-fusion	ABCB6--TFR2	chr2:219217670--chr7:100632198	1
HCC1395	ctat-LR-fusion	AAMP--LINC00665	chr2:218269382--chr19:36313322	1
HCC1395	ctat-LR-fusion	AC027612.6--NVL	chr2:91654920--chr1:224268133	1
HCC1395	ctat-LR-fusion	ADAM12--RAB1A	chr10:126093985--chr2:65104806	1
HCC1395	ctat-LR-fusion	ADCY7--AC138969.4	chr16:50266680--chr16:16335861	1
HCC1395	ctat-LR-fusion	ADK--ZNF467	chr10:74314745--chr7:149764678	1
HCC1395	ctat-LR-fusion	ANXA2--ZNF706	chr15:60351193--chr8:101201743	1
HCC1395	ctat-LR-fusion	ANXA1--RPS29	chr9:73158803--chr14:49586049	1
HCC1395	ctat-LR-fusion	ANKRD50--ATF7IP	chr4:124710000--chr12:14456561	1
HCC1395	ctat-LR-fusion	ANKRD27--SDCCAG3	chr19:32631402--chr9:136405978	1
HCC1395	ctat-LR-fusion	ANAPC5--GTF2I	chr12:121347802--chr7:74756820	1
HCC1395	ctat-LR-fusion	ALDH9A1--DAP3	chr1:165679442--chr1:155729208	1
HCC1395	ctat-LR-fusion	ALDH3B1--C19orf48	chr11:68015459--chr19:50802257	1
HCC1395	ctat-LR-fusion	ALDH3A2--RBPMS	chr17:19652632--chr8:30504286	1
HCC1395	ctat-LR-fusion	AKR1C1--RAC1	chr10:4963528--chr7:6400126	1
HCC1395	ctat-LR-fusion	AKAP9--KYNU	chr7:91941147--chr2:142885349	1
HCC1395	ctat-LR-fusion	AKAP9--CAV1	chr7:91941147--chr7:116558946	1
HCC1395	ctat-LR-fusion	AIMP2--EIF3E	chr7:6015352--chr8:108229195	1
HCC1395	ctat-LR-fusion	AIFM1--NRP1	chrX:130165551--chr10:33263873	1
HCC1395	ctat-LR-fusion	AGPAT9--COPS4	chr4:83544602--chr4:83075297	1
HCC1395	ctat-LR-fusion	AGPAT5--LYAR	chr8:6708887--chr4:4283795	1
HCC1395	ctat-LR-fusion	AGPAT5--HNRNPC	chr8:6708887--chr14:21234229	1
HCC1395	ctat-LR-fusion	AGO3--ICE1	chr1:35931445--chr5:5436418	1
HCC1395	ctat-LR-fusion	AFG3L2--IMPA2	chr18:12376969--chr18:11999054	1
HCC1395	ctat-LR-fusion	ADSS--SND1	chr1:244451635--chr7:127844324	1
HCC1395	ctat-LR-fusion	ADPGK--ST20	chr15:72760407--chr15:79907684	1
HCC1395	ctat-LR-fusion	ADORA2B--HSPA9	chr17:15945583--chr5:138560091	1
HCC1395	ctat-LR-fusion	BCCIP--FLJ37035	chr10:125841330--chr10:125709567	1
HCC1395	ctat-LR-fusion	BCKDHB--GRIK2	chr6:80203212--chr6:101889640	1
HCC1395	ctat-LR-fusion	BCLAF1--HECA	chr6:136289713--chr6:139174385	1
HCC1395	ctat-LR-fusion	BIN1--SNX12	chr2:127106860--chrX:71062949	1
HCC1395	ctat-LR-fusion	CRNDE--COL12A1	chr16:54923585--chr6:75101653	1
HCC1395	ctat-LR-fusion	CREG1--MRE11A	chr1:167548002--chr11:94447438	1
HCC1395	ctat-LR-fusion	CPNE1--CCNI	chr20:35658930--chr4:77066405	1
HCC1395	ctat-LR-fusion	COX7C--CAPNS1	chr5:86618053--chr19:36143064	1
HCC1395	ctat-LR-fusion	COQ2--SEC31A	chr4:83278948--chr4:82829058	1
HCC1395	ctat-LR-fusion	COPS8--FAM120A	chr2:237086042--chr9:93543222	1
HCC1395	ctat-LR-fusion	COPA--NXF1	chr1:160325543--chr11:62802260	1
HCC1395	ctat-LR-fusion	COMMD8--CHMP1A	chr4:47460144--chr16:89647331	1
HCC1395	ctat-LR-fusion	COMMD7--NFX1	chr20:32727893--chr9:33366629	1
HCC1395	ctat-LR-fusion	CRNDE--FTO	chr16:54928770--chr16:53933985	1
HCC1395	ctat-LR-fusion	CNST--USO1	chr1:246566789--chr4:75782680	1
HCC1395	ctat-LR-fusion	CNOT4--C7orf49	chr7:135509889--chr7:135169060	1
HCC1395	ctat-LR-fusion	CMSS1--SDR39U1	chr3:99818043--chr14:24442452	1
HCC1395	ctat-LR-fusion	CMC1--ANO10	chr3:28241812--chr3:43605863	1
HCC1395	ctat-LR-fusion	CMB9-22P13.1--KANSL2	chr11:65455331--chr12:48655060	1
HCC1395	ctat-LR-fusion	CMAS--ZMIZ1	chr12:22060926--chr10:79312642	1
HCC1395	ctat-LR-fusion	CLPSL1--RP11-186B7.4	chr6:35787120--chr17:7575119	1
HCC1395	ctat-LR-fusion	CLPSL1--EIF4A1	chr6:35787120--chr17:7575119	1
HCC1395	ctat-LR-fusion	CLPSL1--CPNE1	chr6:35787120--chr20:35632923	1
HCC1395	ctat-LR-fusion	CLPB--AP3D1	chr11:72430312--chr19:2129457	1
HCC1395	ctat-LR-fusion	CNPY2--TRIP6	chr12:56314851--chr7:100870370	1
HCC1395	ctat-LR-fusion	CSGALNACT1--FDFT1	chr8:19757186--chr8:11808794	1
HCC1395	ctat-LR-fusion	CSNK1D--FOXK2	chr17:82249431--chr17:82601303	1
HCC1395	ctat-LR-fusion	CSNK1D--SEPT9	chr17:82248875--chr17:77497315	1
HCC1395	ctat-LR-fusion	DDX19B--SMAD2	chr16:70299354--chr18:47896809	1
HCC1395	ctat-LR-fusion	DDX19A--SMAD2	chr16:70299354--chr18:47896809	1
HCC1395	ctat-LR-fusion	DDR1--EIF3M	chr6:30876559--chr11:32589547	1
HCC1395	ctat-LR-fusion	DDOST--KIF17	chr1:20654223--chr1:20666331	1
HCC1395	ctat-LR-fusion	DDAH1--USP10	chr1:85464743--chr16:84733435	1
HCC1395	ctat-LR-fusion	DCK--CCNI	chr4:70998182--chr4:77066405	1
HCC1395	ctat-LR-fusion	DCBLD2--PDHA1	chr3:98881540--chrX:19355349	1
HCC1395	ctat-LR-fusion	DCAKD--DPH5	chr17:45060888--chr1:101013818	1
HCC1395	ctat-LR-fusion	DCAF11--GAS5	chr14:24115726--chr1:173864506	1
HCC1395	ctat-LR-fusion	DBNDD1--EIF5	chr16:90008784--chr14:103338327	1
HCC1395	ctat-LR-fusion	DANCR--KHDRBS3	chr4:52712959--chr8:135645059	1
HCC1395	ctat-LR-fusion	DAB2--ATG3	chr5:39424804--chr3:112537890	1
HCC1395	ctat-LR-fusion	CYTH1--PGS1	chr17:78782202--chr17:78414952	1
HCC1395	ctat-LR-fusion	CYTH1--EIF3H	chr17:78782202--chr8:116658980	1
HCC1395	ctat-LR-fusion	CUX1--RPL41	chr7:101916225--chr12:56116775	1
HCC1395	ctat-LR-fusion	CTNNB1--RPSA	chr3:41199670--chr3:39411649	1
HCC1395	ctat-LR-fusion	CTNNA1--TKT	chr5:138824799--chr3:53230621	1
HCC1395	ctat-LR-fusion	CTD-2337A12.1--CAST	chr5:96379652--chr5:96695836	1
HCC1395	ctat-LR-fusion	CTA-445C9.14--HADHB	chr22:26513034--chr2:26289918	1
HCC1395	ctat-LR-fusion	CT83--TES	chrX:116462782--chr7:116234534	1
HCC1395	ctat-LR-fusion	CSNK1E--AKT3	chr22:38361399--chr1:243613739	1
HCC1395	ctat-LR-fusion	CLN6--RPLP0	chr15:68214290--chr12:120197462	1
HCC1395	ctat-LR-fusion	DEPDC1-AS1--CRELD2	chr1:68529479--chr22:49918759	1
HCC1395	ctat-LR-fusion	CLN6--OAZ1	chr15:68218536--chr19:2271385	1
HCC1395	ctat-LR-fusion	CHST15--HMGB3	chr10:124093469--chrX:150985595	1
HCC1395	ctat-LR-fusion	CALD1--AKR1B10	chr7:134960628--chr7:134533004	1
HCC1395	ctat-LR-fusion	C9orf9--GGA1	chr9:132888437--chr22:37618448	1
HCC1395	ctat-LR-fusion	C9orf89--SNX30	chr9:93096352--chr9:112864247	1
HCC1395	ctat-LR-fusion	C9orf41--TMOD1	chr9:75016268--chr9:97591291	1
HCC1395	ctat-LR-fusion	C9--ATG3	chr5:39424804--chr3:112537890	1
HCC1395	ctat-LR-fusion	C7orf73--UBE2H	chr7:135672806--chr7:129880971	1
HCC1395	ctat-LR-fusion	C5orf22--TARS	chr5:31535893--chr5:33448541	1
HCC1395	ctat-LR-fusion	C4orf29--UBTF	chr4:127965606--chr17:44218296	1
HCC1395	ctat-LR-fusion	C4orf27--ZC3H11A	chr4:169753676--chr1:203816926	1
HCC1395	ctat-LR-fusion	CARKD--TFDP1	chr13:110627547--chr13:113634534	1
HCC1395	ctat-LR-fusion	C1QTNF1-AS1--PSMA7	chr17:79027376--chr20:62140944	1
HCC1395	ctat-LR-fusion	C18orf32--RPL19	chr18:49490454--chr17:39202989	1
HCC1395	ctat-LR-fusion	C16orf74--NDUFV1	chr16:85735190--chr11:67608400	1
HCC1395	ctat-LR-fusion	C12orf76--WAPAL	chr12:110048363--chr10:86460496	1
HCC1395	ctat-LR-fusion	BYSL--KPNA3	chr6:41930768--chr13:49701527	1
HCC1395	ctat-LR-fusion	BSG--CDC34	chr19:572701--chr19:537013	1
HCC1395	ctat-LR-fusion	BRWD3--SH3BGRL	chrX:80791854--chrX:81276984	1
HCC1395	ctat-LR-fusion	BRD8--MRPL1	chr5:138177571--chr4:77871744	1
HCC1395	ctat-LR-fusion	BRCC3--CMC4	chrX:155071650--chrX:155064033	1
HCC1395	ctat-LR-fusion	BNIP1--ERGIC1	chr5:173144629--chr5:172950709	1
HCC1395	ctat-LR-fusion	C18orf8--ABHD3	chr18:23504447--chr18:21664230	1
HCC1395	ctat-LR-fusion	CARS--FEZ2	chr11:3038050--chr2:36591011	1
HCC1395	ctat-LR-fusion	CASKIN2--FBXL15	chr17:75506984--chr10:102421354	1
HCC1395	ctat-LR-fusion	CBR4--NEK1	chr4:169002071--chr4:169463395	1
HCC1395	ctat-LR-fusion	CHMP4A--MGEA5	chr14:24211411--chr10:101792901	1
HCC1395	ctat-LR-fusion	CHMP3--UNC50	chr2:86563304--chr2:98609756	1
HCC1395	ctat-LR-fusion	CHMP2B--AIMP1	chr3:87227556--chr4:106347526	1
HCC1395	ctat-LR-fusion	CHKB--PRMT1	chr22:50580190--chr19:49688162	1
HCC1395	ctat-LR-fusion	CHID1--TSPAN4	chr11:884068--chr11:866562	1
HCC1395	ctat-LR-fusion	CHCHD3--EXOC4	chr7:133070142--chr7:133630045	1
HCC1395	ctat-LR-fusion	CH507-254M2.3--KTN1	chr21:6721991--chr14:55612019	1
HCC1395	ctat-LR-fusion	CH507-254M2.3--GMPR2	chr21:6721991--chr14:24235737	1
HCC1395	ctat-LR-fusion	CGGBP1--RHOA	chr3:88140970--chr3:49360382	1
HCC1395	ctat-LR-fusion	CEP85--VPS26A	chr1:26255865--chr10:69171156	1
HCC1395	ctat-LR-fusion	CEP57--SNX5	chr11:95818904--chr20:17951595	1
HCC1395	ctat-LR-fusion	CEMIP--CGGBP1	chr15:80779614--chr3:88058223	1
HCC1395	ctat-LR-fusion	CDH2--CSNK1A1	chr18:27982944--chr5:149496860	1
HCC1395	ctat-LR-fusion	CDH11--PSME4	chr16:65121880--chr2:53875755	1
HCC1395	ctat-LR-fusion	CDC25C--EMP3	chr5:138337956--chr19:48329352	1
HCC1395	ctat-LR-fusion	CD97--MCM7	chr19:14381545--chr7:100095470	1
HCC1395	ctat-LR-fusion	CCT3--SLC26A5	chr1:156320839--chr7:103352926	1
HCC1395	ctat-LR-fusion	CCNT2--KYNU	chr2:134919891--chr2:142885349	1
HCC1395	ctat-LR-fusion	CCDC40--RPLP1	chr17:80040270--chr15:69455170	1
HCC1395	ctat-LR-fusion	CCDC130--PHF20	chr19:13732285--chr20:35800094	1
HCC1395	ctat-LR-fusion	CCDC117--RPL7	chr22:28773778--chr8:73292797	1
HCC1395	ctat-LR-fusion	CKS2--EHMT1	chr9:89311351--chr9:137716626	1
HCC1395	ctat-LR-fusion	MNAT1--HIF1A	chr14:60879835--chr14:61720379	1
HCC1395	ctat-LR-fusion	LINC00152--FARSB	chr2:87455645--chr2:222572022	1
HCC1395	ctat-LR-fusion	MRPL13--RP11-157E21.1	chr8:120425306--chr8:133897556	1
HCC1395	ctat-LR-fusion	ST7--ATP5C1	chr7:117138532--chr10:7806974	1
HCC1395	ctat-LR-fusion	ST3GAL1--NFYB	chr8:133571693--chr12:104135532	1
HCC1395	ctat-LR-fusion	ST3GAL1--ASAP1	chr8:133545774--chr8:130236994	1
HCC1395	ctat-LR-fusion	ST13--CEP57L1	chr22:40856431--chr6:109159025	1
HCC1395	ctat-LR-fusion	SSR3--CNOT2	chr3:156548905--chr12:70353829	1
HCC1395	ctat-LR-fusion	SSR1--GIPC1	chr6:7309917--chr19:14480778	1
HCC1395	ctat-LR-fusion	SSH2--RPL30	chr17:29793894--chr8:98045399	1
HCC1395	ctat-LR-fusion	SSH1--DAP3	chr12:108852638--chr1:155709773	1
HCC1395	ctat-LR-fusion	SS18L1--TKT	chr20:62143889--chr3:53229436	1
HCC1395	ctat-LR-fusion	ST7--PTK2	chr7:116953691--chr8:140864399	1
HCC1395	ctat-LR-fusion	SRSF4--AP000347.4	chr1:29181646--chr22:23638942	1
HCC1395	ctat-LR-fusion	SRC--MANBAL	chr20:37346255--chr20:37316308	1
HCC1395	ctat-LR-fusion	SPTAN1--PSMB1	chr9:128552696--chr6:170549113	1
HCC1395	ctat-LR-fusion	SPRED2--QRFPR	chr2:65431962--chr4:121340610	1
HCC1395	ctat-LR-fusion	SPIN1--YWHAB	chr9:88388538--chr20:44901531	1
HCC1395	ctat-LR-fusion	SPECC1L--TRAPPC12	chr22:24270983--chr2:3457621	1
HCC1395	ctat-LR-fusion	SPECC1L--TMEM120B	chr22:24270983--chr12:121761649	1
HCC1395	ctat-LR-fusion	SPDYA--IFITM3	chr2:28799299--chr11:320772	1
HCC1395	ctat-LR-fusion	SPDL1--NUDT4	chr5:169583889--chr12:93394609	1
HCC1395	ctat-LR-fusion	SPATC1L--LSS	chr21:46184356--chr21:46188821	1
HCC1395	ctat-LR-fusion	SRPK2--AFG3L2	chr7:105268806--chr18:12370926	1
HCC1395	ctat-LR-fusion	ST7--TES	chr7:117099844--chr7:116234534	1
HCC1395	ctat-LR-fusion	ST7L--TSEN2	chr1:112610841--chr3:12539161	1
HCC1395	ctat-LR-fusion	STAT3--DHRS3	chr17:42345559--chr1:12579412	1
HCC1395	ctat-LR-fusion	TET1--EEF2K	chr10:68560742--chr16:22225654	1
HCC1395	ctat-LR-fusion	TES--CAV1	chr7:116234619--chr7:116558946	1
HCC1395	ctat-LR-fusion	TES--CAV1	chr7:116210734--chr7:116558946	1
HCC1395	ctat-LR-fusion	TCEB3-AS1--VIM	chr1:23772111--chr10:17230650	1
HCC1395	ctat-LR-fusion	TBL1X--USP10	chrX:9501849--chr16:84733435	1
HCC1395	ctat-LR-fusion	TBL1X--TMEM245	chrX:9501849--chr9:109036380	1
HCC1395	ctat-LR-fusion	TBC1D10A--PES1	chr22:30299444--chr22:30581644	1
HCC1395	ctat-LR-fusion	TAX1BP3--MYBBP1A	chr17:3664679--chr17:4539967	1
HCC1395	ctat-LR-fusion	TATDN1--GSDMB	chr8:124538928--chr17:39909924	1
HCC1395	ctat-LR-fusion	TAF9--SUN1	chr5:69369657--chr7:886056	1
HCC1395	ctat-LR-fusion	TAF9--GET4	chr5:69369657--chr7:886056	1
HCC1395	ctat-LR-fusion	TACC2--MYOF	chr10:122113233--chr10:93431516	1
HCC1395	ctat-LR-fusion	TAB1--DDX17	chr22:39421971--chr22:38498150	1
HCC1395	ctat-LR-fusion	SUV420H1--C11orf24	chr11:68213477--chr11:68268251	1
HCC1395	ctat-LR-fusion	SUN1--PWWP2B	chr7:866067--chr10:132417061	1
HCC1395	ctat-LR-fusion	SUCLG2--NDUFB4	chr3:67518247--chr3:120602208	1
HCC1395	ctat-LR-fusion	SUCLA2--ITM2B	chr13:47988541--chr13:48253808	1
HCC1395	ctat-LR-fusion	SUB1--TMEM87A	chr5:32591685--chr15:42211749	1
HCC1395	ctat-LR-fusion	STXBP4--SRSF1	chr17:55007597--chr17:58005041	1
HCC1395	ctat-LR-fusion	STX1B--VIM	chr16:30993130--chr10:17236294	1
HCC1395	ctat-LR-fusion	STIP1--ANXA4	chr11:64193287--chr2:69816101	1
HCC1395	ctat-LR-fusion	SP110--SP100	chr2:230219874--chr2:230461262	1
HCC1395	ctat-LR-fusion	TEX2--PSMB1	chr17:64263168--chr6:170549113	1
HCC1395	ctat-LR-fusion	SORD--B2M	chr15:45023349--chr15:44715423	1
HCC1395	ctat-LR-fusion	SOCS4--FBXO34	chr14:55027471--chr14:55350381	1
HCC1395	ctat-LR-fusion	SGSM3--CALM3	chr22:40370688--chr19:46605827	1
HCC1395	ctat-LR-fusion	SGCB--SRSF1	chr4:52027968--chr17:58005041	1
HCC1395	ctat-LR-fusion	SFT2D2--TIPRL	chr1:168235182--chr1:168191369	1
HCC1395	ctat-LR-fusion	SF3B2--TRIP12	chr11:66061998--chr2:229767750	1
HCC1395	ctat-LR-fusion	SF1--YWHAE	chr11:64776498--chr17:1345499	1
HCC1395	ctat-LR-fusion	SETD5--CEP63	chr3:9397977--chr3:134561377	1
HCC1395	ctat-LR-fusion	SERPINE2--FAM124B	chr2:224039099--chr2:224380208	1
HCC1395	ctat-LR-fusion	SEP15--GCLM	chr1:86903281--chr1:93901669	1
HCC1395	ctat-LR-fusion	SEC24D--SLC10A7	chr4:118824620--chr4:146325996	1
HCC1395	ctat-LR-fusion	SH2B1--HARS	chr16:28846827--chr5:140675133	1
HCC1395	ctat-LR-fusion	SEC24A--RGMA	chr5:134649173--chr15:93073031	1
HCC1395	ctat-LR-fusion	SEC23IP--BAG3	chr10:119892945--chr10:119672255	1
HCC1395	ctat-LR-fusion	SDHAP2--ANXA7	chr3:195666214--chr10:73388414	1
HCC1395	ctat-LR-fusion	SDC4--MBD2	chr20:45348325--chr18:54205157	1
HCC1395	ctat-LR-fusion	SCMH1--SMARCD2	chr1:41186121--chr17:63835567	1
HCC1395	ctat-LR-fusion	SCAPER--ETFA	chr15:76841734--chr15:76216597	1
HCC1395	ctat-LR-fusion	SAR1B--CAMLG	chr5:134612691--chr5:134750759	1
HCC1395	ctat-LR-fusion	SAR1B--ARID4A	chr5:134620933--chr14:58328237	1
HCC1395	ctat-LR-fusion	SAR1A--SLMO1	chr10:70170413--chr18:12429350	1
HCC1395	ctat-LR-fusion	SAP30L-AS1--FAM35A	chr5:154443362--chr10:87187085	1
HCC1395	ctat-LR-fusion	SEC23IP--RBM39	chr10:119892945--chr20:35713096	1
HCC1395	ctat-LR-fusion	SH3GL1--UBE2D2	chr19:4400324--chr5:139600372	1
HCC1395	ctat-LR-fusion	SH3GL1--WHSC1	chr19:4400324--chr4:1974863	1
HCC1395	ctat-LR-fusion	SHFM1--PRKRIP1	chr7:96709688--chr7:102425014	1
HCC1395	ctat-LR-fusion	SOCS1--EXT1	chr16:11256079--chr8:117837201	1
HCC1395	ctat-LR-fusion	SNX2--TCERG1	chr5:122775211--chr5:146469544	1
HCC1395	ctat-LR-fusion	SNRPD1--PPP2R4	chr18:21612443--chr9:129142445	1
HCC1395	ctat-LR-fusion	SNHG5--MKI67	chr6:85677795--chr10:128119319	1
HCC1395	ctat-LR-fusion	SNHG3--STX8	chr1:28508160--chr17:9491921	1
HCC1395	ctat-LR-fusion	SNAPC1--SEPT7	chr14:61762588--chr7:35885828	1
HCC1395	ctat-LR-fusion	SMG6--VEGFB	chr17:2282647--chr11:64237420	1
HCC1395	ctat-LR-fusion	SMAP1--GALNT11	chr6:70668141--chr7:152094190	1
HCC1395	ctat-LR-fusion	MOB1B--CCNI	chr4:70998182--chr4:77066405	1
HCC1395	ctat-LR-fusion	SLTM--NRF1	chr15:58916935--chr7:129630078	1
HCC1395	ctat-LR-fusion	SLIRP--TMEM87A	chr14:77715879--chr15:42244167	1
HCC1395	ctat-LR-fusion	SLC6A6--YWHAH	chr3:14416453--chr22:31956139	1
HCC1395	ctat-LR-fusion	SLC43A2--DNAJB6	chr17:1578250--chr7:157416016	1
HCC1395	ctat-LR-fusion	SLC38A9--DHX29	chr5:55697846--chr5:55256540	1
HCC1395	ctat-LR-fusion	SLC35A2--OTUD5	chrX:48904746--chrX:48944283	1
HCC1395	ctat-LR-fusion	SLC2A8--NDRG1	chr9:127400006--chr8:133284329	1
HCC1395	ctat-LR-fusion	SLC2A1--VIM	chr1:42958634--chr10:17235169	1
HCC1395	ctat-LR-fusion	SLC27A1--FKBP8	chr19:17470707--chr19:18541995	1
HCC1395	ctat-LR-fusion	SLC25A6--AKR1C2	chrX:1391899--chr10:5001681	1
HCC1395	ctat-LR-fusion	SLAIN2--ANXA5	chr4:48342128--chr4:121686372	1
HCC1395	ctat-LR-fusion	SHQ1--RP11-260O18.1	chr3:72792916--chr3:82042725	1
HCC1395	ctat-LR-fusion	SORCS2--EFCAB11	chr4:7396355--chr14:89954001	1
HCC1395	ctat-LR-fusion	S100PBP--ASPH	chr1:32817689--chr8:61638363	1
HCC1395	ctat-LR-fusion	THRAP3--TVP23C	chr1:36287270--chr17:15503232	1
HCC1395	ctat-LR-fusion	TIAM2--SCAF8	chr6:154995492--chr6:154773989	1
HCC1395	ctat-LR-fusion	WDR6--LSM5	chr3:49007531--chr7:32489344	1
HCC1395	ctat-LR-fusion	WDR6--AC004967.7	chr3:49007531--chr7:97969845	1
HCC1395	ctat-LR-fusion	WDR5--TSPO	chr9:134154541--chr22:43161052	1
HCC1395	ctat-LR-fusion	WDR27--RTN4	chr6:169701551--chr2:54987698	1
HCC1395	ctat-LR-fusion	WDFY3-AS2--DHTKD1	chr4:85004327--chr10:12106246	1
HCC1395	ctat-LR-fusion	WDFY2--DLEU1	chr13:51703650--chr13:50104704	1
HCC1395	ctat-LR-fusion	WBP1L--PPRC1	chr10:102744143--chr10:102148817	1
HCC1395	ctat-LR-fusion	WASF2--CLSTN1	chr1:27489986--chr1:9773394	1
HCC1395	ctat-LR-fusion	VPS13B--IRF2	chr8:99013935--chr4:184429070	1
HCC1395	ctat-LR-fusion	WISP1--CPNE1	chr8:133191213--chr20:35632923	1
HCC1395	ctat-LR-fusion	VOPP1--BID	chr7:55492282--chr22:17735591	1
HCC1395	ctat-LR-fusion	VDAC1--STIP1	chr5:133975871--chr11:64193078	1
HCC1395	ctat-LR-fusion	VAV2--RAC1	chr9:133939103--chr7:6400126	1
HCC1395	ctat-LR-fusion	UVSSA--MAEA	chr4:1348189--chr4:1332757	1
HCC1395	ctat-LR-fusion	USP47--EIF4G2	chr11:11892106--chr11:10799756	1
HCC1395	ctat-LR-fusion	USP33--SHFM1	chr1:77723331--chr7:96688966	1
HCC1395	ctat-LR-fusion	UROS--UBE2D2	chr10:125794880--chr5:139623368	1
HCC1395	ctat-LR-fusion	UNC5C--STPG2	chr4:95278259--chr4:97187833	1
HCC1395	ctat-LR-fusion	UHRF1--UBB	chr19:4911038--chr17:16381902	1
HCC1395	ctat-LR-fusion	UGT1A6--DNAJB6	chr2:233693865--chr7:157382246	1
HCC1395	ctat-LR-fusion	VEZT--EOGT	chr12:95256622--chr3:69012799	1
HCC1395	ctat-LR-fusion	WSB2--PEBP1	chr12:118042841--chr12:118144586	1
HCC1395	ctat-LR-fusion	YPEL2--DDX5	chr17:59331824--chr17:64504842	1
HCC1395	ctat-LR-fusion	YWHAZ--ZNF706	chr8:100951929--chr8:101201743	1
HCC1395	ctat-LR-fusion	ZSCAN30--MYL12B	chr18:35290084--chr18:3272884	1
HCC1395	ctat-LR-fusion	ZNRD1-AS1--ASPH	chr6:30021667--chr8:61503509	1
HCC1395	ctat-LR-fusion	ZNF92--RPL5	chr7:65374000--chr1:92840551	1
HCC1395	ctat-LR-fusion	ZNF736--TUBGCP6	chr7:64336982--chr22:50220015	1
HCC1395	ctat-LR-fusion	ZNF736--DNAAF5	chr7:64336982--chr7:785517	1
HCC1395	ctat-LR-fusion	ZNF678--CTNNA1	chr1:227563724--chr5:138810038	1
HCC1395	ctat-LR-fusion	ZNF521--NOC4L	chr18:25350907--chr12:132151258	1
HCC1395	ctat-LR-fusion	ZNF521--HP1BP3	chr18:25322008--chr1:20773610	1
HCC1395	ctat-LR-fusion	ZNF518A--HDHD2	chr10:96156047--chr18:47130328	1
HCC1395	ctat-LR-fusion	ZNF37BP--C10orf25	chr10:42550557--chr10:45000416	1
HCC1395	ctat-LR-fusion	ZNF292--SNHG10	chr6:87245644--chr14:95533061	1
HCC1395	ctat-LR-fusion	ZNF282--C7orf55-LUC7L2	chr7:149198752--chr7:139398599	1
HCC1395	ctat-LR-fusion	ZNF271P--RANBP10	chr18:35291232--chr16:67772086	1
HCC1395	ctat-LR-fusion	ZNF14--PDSS1	chr19:19732956--chr10:26735240	1
HCC1395	ctat-LR-fusion	ZNF131--RTF1	chr5:43068217--chr15:41452901	1
HCC1395	ctat-LR-fusion	ZKSCAN8--HMGXB4	chr6:28149624--chr22:35262323	1
HCC1395	ctat-LR-fusion	ZHX1--NPIPB5	chr8:123267273--chr16:22523820	1
HCC1395	ctat-LR-fusion	ZFR--RBM34	chr5:32444229--chr1:235131997	1
HCC1395	ctat-LR-fusion	ZFR--ARID4B	chr5:32444229--chr1:235131997	1
HCC1395	ctat-LR-fusion	ZCCHC17--CHMP1A	chr1:31319166--chr16:89647331	1
HCC1395	ctat-LR-fusion	ZBTB38--SND1	chr3:141381487--chr7:128074502	1
HCC1395	ctat-LR-fusion	UGDH-AS1--RP11-347C12.1	chr4:39528338--chr16:30240242	1
HCC1395	ctat-LR-fusion	THRB--TOP2B	chr3:24228938--chr3:25645455	1
HCC1395	ctat-LR-fusion	UGDH-AS1--FAM216A	chr4:39528338--chr12:110485078	1
HCC1395	ctat-LR-fusion	UBQLN1--SLC44A1	chr9:83707500--chr9:105374598	1
HCC1395	ctat-LR-fusion	TRIOBP--EXOSC4	chr22:37751828--chr8:144079943	1
HCC1395	ctat-LR-fusion	TRIB3--FKBP8	chr20:381169--chr19:18541995	1
HCC1395	ctat-LR-fusion	TREX2--PACSIN3	chrX:153469146--chr11:47183069	1
HCC1395	ctat-LR-fusion	TRAPPC6A--MLF2	chr19:45164164--chr12:6748982	1
HCC1395	ctat-LR-fusion	TPST1--GNB1	chr7:66356871--chr1:1839238	1
HCC1395	ctat-LR-fusion	TPM1--WBP1	chr15:63044152--chr2:74458997	1
HCC1395	ctat-LR-fusion	TPM1--PPIB	chr15:63059680--chr15:64156909	1
HCC1395	ctat-LR-fusion	TOP3B--MAD2L2	chr22:21958492--chr1:11680613	1
HCC1395	ctat-LR-fusion	TOM1--AGPAT4	chr22:35338788--chr6:161136634	1
HCC1395	ctat-LR-fusion	TRIP12--AGFG1	chr2:229879982--chr2:227519948	1
HCC1395	ctat-LR-fusion	TNRC18--RSU1	chr7:5394440--chr10:16593496	1
HCC1395	ctat-LR-fusion	TNPO1--LAGE3	chr5:72848498--chrX:154478411	1
HCC1395	ctat-LR-fusion	TMEM30A--CAMSAP2	chr6:75284402--chr1:200852541	1
HCC1395	ctat-LR-fusion	TMEM223--FUOM	chr11:62791679--chr10:133357013	1
HCC1395	ctat-LR-fusion	TMEM219--DLEU2	chr16:29971578--chr13:50045232	1
HCC1395	ctat-LR-fusion	TMEM184B--MANBAL	chr22:38231244--chr20:37316308	1
HCC1395	ctat-LR-fusion	TMEM178B--RP11-944C7.1	chr7:141212704--chr14:89629136	1
HCC1395	ctat-LR-fusion	TMEM161B-AS1--MSH3	chr5:88270585--chr5:80854130	1
HCC1395	ctat-LR-fusion	TLN2--TPM1	chr15:62390685--chr15:63056985	1
HCC1395	ctat-LR-fusion	TIMM23B--RPL37	chr10:49942300--chr5:40834606	1
HCC1395	ctat-LR-fusion	TNPO1--RAP1B	chr5:72816752--chr12:68648699	1
HCC1395	ctat-LR-fusion	TRPM7--ETFA	chr15:50686531--chr15:76295737	1
HCC1395	ctat-LR-fusion	TRPS1--EIF3H	chr8:115661570--chr8:116658980	1
HCC1395	ctat-LR-fusion	TRPS1--FUS	chr8:115667874--chr16:31188325	1
HCC1395	ctat-LR-fusion	UBE4B--EXOSC10	chr1:10145039--chr1:11066748	1
HCC1395	ctat-LR-fusion	UBE2Q2P6--SLC25A17	chr15:82372498--chr22:40799083	1
HCC1395	ctat-LR-fusion	UBE2K--RHEB	chr4:39698390--chr7:151491014	1
HCC1395	ctat-LR-fusion	UBE2G1--CYB5D2	chr17:4366271--chr17:4149891	1
HCC1395	ctat-LR-fusion	UBE2E3--TTN-AS1	chr2:180984093--chr2:178614035	1
HCC1395	ctat-LR-fusion	UBE2E3--NAB1	chr2:180984093--chr2:190659277	1
HCC1395	ctat-LR-fusion	UBE2B--HLCS	chr5:134371639--chr21:36767285	1
HCC1395	ctat-LR-fusion	UBAP1--CXCL12	chr9:34179240--chr10:44380880	1
HCC1395	ctat-LR-fusion	UBAC1--ADRM1	chr9:135961025--chr20:62306197	1
HCC1395	ctat-LR-fusion	UBA2--TPD52L2	chr19:34428570--chr20:63882719	1
HCC1395	ctat-LR-fusion	TYW1--RP11-495P10.3	chr7:67067403--chr1:148329526	1
HCC1395	ctat-LR-fusion	TULP3--MTCP1	chr12:2909580--chrX:155064033	1
HCC1395	ctat-LR-fusion	TULP3--CMC4	chr12:2909580--chrX:155064033	1
HCC1395	ctat-LR-fusion	TTLL4--PIR	chr2:218727347--chrX:15479821	1
HCC1395	ctat-LR-fusion	TTC9C--GLUD1	chr11:62735564--chr10:87068157	1
HCC1395	ctat-LR-fusion	TTC3--CD99	chr21:37073473--chrX:2738200	1
HCC1395	ctat-LR-fusion	TTC19--ARGLU1	chr17:16026702--chr13:106544160	1
HCC1395	ctat-LR-fusion	TTC1--LIX1	chr5:160010858--chr5:97096887	1
HCC1395	ctat-LR-fusion	TSSK3--ATP5S	chr1:32353541--chr14:50321483	1
HCC1395	ctat-LR-fusion	TSN--NDUFB6	chr2:121763084--chr9:32553944	1
HCC1395	ctat-LR-fusion	TSEN15--C1orf21	chr1:184054863--chr1:184619518	1
HCC1395	ctat-LR-fusion	UGDH--SEPHS1	chr4:39527283--chr10:13345028	1
HCC1395	ctat-LR-fusion	RUSC2--SHFM1	chr9:35490172--chr7:96694891	1
HCC1395	ctat-LR-fusion	SMAD7--HNRNPC	chr18:48942481--chr14:21234229	1
HCC1395	ctat-LR-fusion	RTFDC1--RPL37A	chr20:56468766--chr2:216499270	1
HCC1395	ctat-LR-fusion	PIGB--AC138969.4	chr15:55321390--chr16:16340306	1
HCC1395	ctat-LR-fusion	PHTF2--PCMT1	chr7:77798971--chr6:149771162	1
HCC1395	ctat-LR-fusion	PHRF1--RPS9	chr11:582081--chr19:54206276	1
HCC1395	ctat-LR-fusion	PHC3--PRDX1	chr3:170171373--chr1:45511414	1
HCC1395	ctat-LR-fusion	PGM2--RBPJ	chr4:37834724--chr4:26386353	1
HCC1395	ctat-LR-fusion	PGLS--ANKS1A	chr19:17511960--chr6:35078558	1
HCC1395	ctat-LR-fusion	PEX13--SMEK2	chr2:61032113--chr2:55550006	1
HCC1395	ctat-LR-fusion	PEA15--CASQ1	chr1:160205522--chr1:160201245	1
HCC1395	ctat-LR-fusion	PDP1--LSM8	chr8:93917945--chr7:118191912	1
HCC1395	ctat-LR-fusion	PIGF--SLC25A24P1	chr2:46592475--chr1:108333657	1
HCC1395	ctat-LR-fusion	PDIA5--MYO10	chr3:123067206--chr5:16783469	1
HCC1395	ctat-LR-fusion	PDIA3--NCBP2	chr15:43746706--chr3:196937082	1
HCC1395	ctat-LR-fusion	RTN3--RP11-703H8.9	chr11:63681778--chr11:62214576	1
HCC1395	ctat-LR-fusion	PDCD6IP--BACH1	chr3:33813628--chr21:29597570	1
HCC1395	ctat-LR-fusion	PCMTD1--TMEM59	chr8:51845661--chr1:54043525	1
HCC1395	ctat-LR-fusion	PCMTD1--ENY2	chr8:51845661--chr8:109343405	1
HCC1395	ctat-LR-fusion	PCMT1--PTPN12	chr6:149771266--chr7:77635782	1
HCC1395	ctat-LR-fusion	PCK2--UBE2T	chr14:24094434--chr1:202333093	1
HCC1395	ctat-LR-fusion	PCDHB9--RPL24	chr5:141187353--chr3:101686557	1
HCC1395	ctat-LR-fusion	PCBP3--ATP5C1	chr21:45744337--chr10:7807659	1
HCC1395	ctat-LR-fusion	PDIA3--RTF1	chr15:43756766--chr15:41470257	1
HCC1395	ctat-LR-fusion	PC--RAD9A	chr11:66870302--chr11:67321270	1
HCC1395	ctat-LR-fusion	PIGF--TMEM219	chr2:46592475--chr16:29971408	1
HCC1395	ctat-LR-fusion	PLAGL2--ASXL1	chr20:32201919--chr20:32366384	1
HCC1395	ctat-LR-fusion	PPP1R8--AF146191.4	chr1:27832816--chr4:189864786	1
HCC1395	ctat-LR-fusion	PPIG--COX8A	chr2:169604261--chr11:63976225	1
HCC1395	ctat-LR-fusion	PPIA--ZNF131	chr7:44796793--chr5:43122039	1
HCC1395	ctat-LR-fusion	PPIA--PSMG3	chr7:44796793--chr7:1569360	1
HCC1395	ctat-LR-fusion	PPIA--PABPN1	chr7:44796793--chr14:23322181	1
HCC1395	ctat-LR-fusion	PPFIBP1--CCDC91	chr12:27647842--chr12:28391304	1
HCC1395	ctat-LR-fusion	PPFIBP1--C16orf87	chr12:27647842--chr16:46803070	1
HCC1395	ctat-LR-fusion	PPA2--AIMP1	chr4:105473894--chr4:106347526	1
HCC1395	ctat-LR-fusion	POU2F1--NME7	chr1:167413114--chr1:169132817	1
HCC1395	ctat-LR-fusion	PIP5K1C--TGFBI	chr19:3667322--chr5:136046851	1
HCC1395	ctat-LR-fusion	POLR2J3--ZCCHC10	chr7:102566997--chr5:133000173	1
HCC1395	ctat-LR-fusion	POLR2E--TMSB15B	chr19:1093904--chrX:104074357	1
HCC1395	ctat-LR-fusion	POLQ--FSTL1	chr3:121532990--chr3:120416027	1
HCC1395	ctat-LR-fusion	POLH--XPO5	chr6:43576440--chr6:43531575	1
HCC1395	ctat-LR-fusion	POLH--ELF2	chr6:43576440--chr4:139139497	1
HCC1395	ctat-LR-fusion	POC5--PLCB4	chr5:75712854--chr20:9419807	1
HCC1395	ctat-LR-fusion	PNKD--ARPC2	chr2:218271549--chr2:218245420	1
HCC1395	ctat-LR-fusion	PMP22--TEKT3	chr17:15260650--chr17:15304152	1
HCC1395	ctat-LR-fusion	PLK1--GAS5	chr16:23687624--chr1:173864304	1
HCC1395	ctat-LR-fusion	PLEC--SPRY1	chr8:143975177--chr4:123401537	1
HCC1395	ctat-LR-fusion	POLR2J3--PRRC2B	chr7:102566997--chr9:131459164	1
HCC1395	ctat-LR-fusion	PARPBP--NUP37	chr12:102124041--chr12:102101104	1
HCC1395	ctat-LR-fusion	PAPOLA--GMDS	chr14:96502600--chr6:1624540	1
HCC1395	ctat-LR-fusion	PANX2--BRD1	chr22:50170956--chr22:49776159	1
HCC1395	ctat-LR-fusion	NEK7--RTF1	chr1:198157276--chr15:41452901	1
HCC1395	ctat-LR-fusion	NEK6--PSMB7	chr9:124258085--chr9:124356915	1
HCC1395	ctat-LR-fusion	NEDD8--KANSL2	chr14:24232250--chr12:48661243	1
HCC1395	ctat-LR-fusion	NDUFB2--RNF34	chr7:140704969--chr12:121417861	1
HCC1395	ctat-LR-fusion	NDUFB2--AES	chr7:140704969--chr19:3061257	1
HCC1395	ctat-LR-fusion	NDUFA13--RPL41	chr19:19527770--chr12:56116775	1
HCC1395	ctat-LR-fusion	NDUFA13--LINC01578	chr19:19516332--chr15:92886169	1
HCC1395	ctat-LR-fusion	NDFIP1--ARHGAP26	chr5:142109037--chr5:143213997	1
HCC1395	ctat-LR-fusion	NBPF1--WDR59	chr1:16613338--chr16:74942826	1
HCC1395	ctat-LR-fusion	NFAT5--PKP4	chr16:69566374--chr2:158577271	1
HCC1395	ctat-LR-fusion	NBEAL1--DANCR	chr2:203016435--chr4:52712824	1
HCC1395	ctat-LR-fusion	NAPG--DBNDD2	chr18:10526158--chr20:45408460	1
HCC1395	ctat-LR-fusion	NAA40--ARAP2	chr11:63939102--chr4:36092020	1
HCC1395	ctat-LR-fusion	MYO1E--FBXO31	chr15:59224689--chr16:87389848	1
HCC1395	ctat-LR-fusion	MYO19--CSTF1	chr17:36527551--chr20:56403468	1
HCC1395	ctat-LR-fusion	MYL6--TNNT1	chr12:56159622--chr19:55146707	1
HCC1395	ctat-LR-fusion	MYDGF--RAD9A	chr19:4659931--chr11:67321270	1
HCC1395	ctat-LR-fusion	MTMR3--RAD51B	chr22:29883359--chr14:68468172	1
HCC1395	ctat-LR-fusion	MRPS5--UBE2D2	chr2:95106423--chr5:139600372	1
HCC1395	ctat-LR-fusion	MRPL34--C7orf55-LUC7L2	chr19:17292854--chr7:139422163	1
HCC1395	ctat-LR-fusion	NAT14--SRRT	chr19:55485780--chr7:100888474	1
HCC1395	ctat-LR-fusion	NFE2L2--UBB	chr2:177264532--chr17:16381902	1
HCC1395	ctat-LR-fusion	NHLRC3--AAR2	chr13:39039711--chr20:36244697	1
HCC1395	ctat-LR-fusion	NINJ1--ORC1	chr9:93134143--chr1:52385949	1
HCC1395	ctat-LR-fusion	PAIP1--RBM17	chr5:43555830--chr10:6108686	1
HCC1395	ctat-LR-fusion	PACSIN2--PCAT19	chr22:43015021--chr19:41456487	1
HCC1395	ctat-LR-fusion	P4HB--KAT8	chr17:81860327--chr16:31120186	1
HCC1395	ctat-LR-fusion	P4HA1--NT5DC1	chr10:73096766--chr6:116236966	1
HCC1395	ctat-LR-fusion	P3H2--FXR1	chr3:190120252--chr3:180933334	1
HCC1395	ctat-LR-fusion	OXNAD1--PDCD6IP	chr3:16303592--chr3:33841897	1
HCC1395	ctat-LR-fusion	OSMR--GPATCH2L	chr5:38885484--chr14:76166663	1
HCC1395	ctat-LR-fusion	OSGIN2--AZIN1	chr8:89902837--chr8:102858150	1
HCC1395	ctat-LR-fusion	OSBPL5--CD81	chr11:3165216--chr11:2390412	1
HCC1395	ctat-LR-fusion	OIP5-AS1--TMEM9	chr15:41286100--chr1:201153959	1
HCC1395	ctat-LR-fusion	OGT--DROSHA	chrX:71538072--chr5:31451640	1
HCC1395	ctat-LR-fusion	NRP1--PARD3	chr10:33330708--chr10:34131583	1
HCC1395	ctat-LR-fusion	NRP1--ETFA	chr10:33263646--chr15:76274494	1
HCC1395	ctat-LR-fusion	NR6A1--RPL35	chr9:124733308--chr9:124861555	1
HCC1395	ctat-LR-fusion	NQO2--WAC	chr6:3006559--chr10:28535562	1
HCC1395	ctat-LR-fusion	NQO2--PIEZO1	chr6:3006559--chr16:88719721	1
HCC1395	ctat-LR-fusion	NQO1--UBB	chr16:69718370--chr17:16381902	1
HCC1395	ctat-LR-fusion	NPR3--UBA52	chr5:32710783--chr19:18573293	1
HCC1395	ctat-LR-fusion	NPM1--UGDH	chr5:171388006--chr4:39514184	1
HCC1395	ctat-LR-fusion	NOP56--SAE1	chr20:2652931--chr19:47169818	1
HCC1395	ctat-LR-fusion	NKTR--SFPQ	chr3:42601064--chr1:35178036	1
HCC1395	ctat-LR-fusion	PPP3CA--INSIG1	chr4:101195916--chr7:155301566	1
HCC1395	ctat-LR-fusion	PPP4R4--HNRNPDL	chr14:94208566--chr4:82427304	1
HCC1395	ctat-LR-fusion	PDHA1--GTF2A2	chrX:19353173--chr15:59639157	1
HCC1395	ctat-LR-fusion	PROSC--PVT1	chr8:37766355--chr8:128100980	1
HCC1395	ctat-LR-fusion	RP11-634B7.4--TRIM58	chr1:247640429--chr1:247860617	1
HCC1395	ctat-LR-fusion	RP11-545I5.3--CENPK	chr6:145828456--chr5:65542848	1
HCC1395	ctat-LR-fusion	RP11-539L10.3--FARS2	chr4:6673684--chr6:5431041	1
HCC1395	ctat-LR-fusion	RP11-473E2.2--DAZAP1	chr9:134505546--chr19:1417500	1
HCC1395	ctat-LR-fusion	RP11-386M24.4--PTTG1	chr15:92733985--chr5:160422302	1
HCC1395	ctat-LR-fusion	RP11-383H13.1--RNF130	chr8:71963048--chr5:179980200	1
HCC1395	ctat-LR-fusion	RP11-383H13.1--HAUS1	chr8:71844422--chr18:46118181	1
HCC1395	ctat-LR-fusion	RP11-333E1.1--WNK1	chr17:5223484--chr12:890453	1
HCC1395	ctat-LR-fusion	RP11-308D16.2--ALDH3A2	chrX:136909780--chr17:19656366	1
HCC1395	ctat-LR-fusion	RP11-661P17.1--FUS	chr15:91473316--chr16:31188325	1
HCC1395	ctat-LR-fusion	RP11-254I22.1--CTD-2337A12.1	chr5:96050201--chr5:96379566	1
HCC1395	ctat-LR-fusion	RP11-254I22.1--CTD-2337A12.1	chr5:96111005--chr5:96379566	1
HCC1395	ctat-LR-fusion	RP11-245P10.4--CYHR1	chr1:228407478--chr8:144465096	1
HCC1395	ctat-LR-fusion	RP11-203I2.1--XRN2	chr9:67082802--chr20:21381994	1
HCC1395	ctat-LR-fusion	RP11-186B7.4--RPL13	chr17:7575258--chr16:89562884	1
HCC1395	ctat-LR-fusion	RP11-182J1.17--WDR73	chr15:84603860--chr15:84653699	1
HCC1395	ctat-LR-fusion	RP11-1252I4.2--RALB	chr5:177939766--chr2:120278615	1
HCC1395	ctat-LR-fusion	RP11-120D5.1--MID1	chrX:11106901--chrX:10567603	1
HCC1395	ctat-LR-fusion	RNF216--NECAP2	chr7:5641154--chr1:16451838	1
HCC1395	ctat-LR-fusion	RNF212--CTBP1	chr4:1096765--chr4:1241519	1
HCC1395	ctat-LR-fusion	RP11-254I22.1--CTD-2337A12.1	chr5:96111005--chr5:96318473	1
HCC1395	ctat-LR-fusion	RP11-661P17.1--GPR107	chr15:91489477--chr9:130124915	1
HCC1395	ctat-LR-fusion	RP11-761E20.1--KTN1	chrX:115946386--chr14:55612019	1
HCC1395	ctat-LR-fusion	RP11-761N21.1--PERP	chr3:40773986--chr6:138092268	1
HCC1395	ctat-LR-fusion	RSRP1--DCTN4	chr1:25245150--chr5:150722980	1
HCC1395	ctat-LR-fusion	RSRC2--H2AFV	chr12:122521385--chr7:44834562	1
HCC1395	ctat-LR-fusion	RPUSD1--UBE2I	chr16:788256--chr16:1324730	1
HCC1395	ctat-LR-fusion	RPS7--TSSC1	chr2:3576630--chr2:3354633	1
HCC1395	ctat-LR-fusion	RPS6KB1--VMP1	chr17:59914703--chr17:59839768	1
HCC1395	ctat-LR-fusion	RPS6KA2--ODF2L	chr6:166448724--chr1:86348878	1
HCC1395	ctat-LR-fusion	RPS29--OXCT1	chr14:49586285--chr5:41840511	1
HCC1395	ctat-LR-fusion	RPS27A--CFAP36	chr2:55233417--chr2:55533873	1
HCC1395	ctat-LR-fusion	RPS19BP1--THOC5	chr22:39532395--chr22:29544603	1
HCC1395	ctat-LR-fusion	PPP4R4--IFI27	chr14:94208566--chr14:94111659	1
HCC1395	ctat-LR-fusion	RPN2--HPRT1	chr20:37199225--chrX:134498608	1
HCC1395	ctat-LR-fusion	RPN1--ATP1B3	chr3:128644919--chr3:141925531	1
HCC1395	ctat-LR-fusion	RPL7--XRN2	chr8:73291043--chr20:21348146	1
HCC1395	ctat-LR-fusion	RPL31--TPT1	chr2:101006071--chr13:45337388	1
HCC1395	ctat-LR-fusion	RPL27A--LINC00152	chr11:8684892--chr2:87521207	1
HCC1395	ctat-LR-fusion	RPL26L1--NDUFB2	chr5:172960041--chr7:140702866	1
HCC1395	ctat-LR-fusion	RPL23--MEF2A	chr17:38853022--chr15:99598430	1
HCC1395	ctat-LR-fusion	RP5-864K19.4--C7orf55-LUC7L2	chr1:38860239--chr7:139422163	1
HCC1395	ctat-LR-fusion	RP3-449O17.1--MTCP1	chr22:38369986--chrX:155064033	1
HCC1395	ctat-LR-fusion	RP3-449O17.1--CMC4	chr22:38369986--chrX:155064033	1
HCC1395	ctat-LR-fusion	RP3-449O17.1--AKT3	chr22:38361399--chr1:243613739	1
HCC1395	ctat-LR-fusion	RNF144A--RTN4	chr2:6941147--chr2:54987698	1
HCC1395	ctat-LR-fusion	RNF123--RPL10A	chr3:49691509--chr6:35470179	1
HCC1395	ctat-LR-fusion	RPN2--USP9X	chr20:37184373--chrX:41223217	1
HCC1395	ctat-LR-fusion	RMI1--UBQLN1	chr9:83980891--chr9:83664043	1
HCC1395	ctat-LR-fusion	PTTG1IP--SNRPD2	chr21:44856193--chr19:45688566	1
HCC1395	ctat-LR-fusion	PTS--EFNB2	chr11:112226526--chr13:106512812	1
HCC1395	ctat-LR-fusion	PTPRS--C9orf3	chr19:5340664--chr9:95086682	1
HCC1395	ctat-LR-fusion	PTPRK--CTD-2066L21.3	chr6:128520259--chr5:33023327	1
HCC1395	ctat-LR-fusion	PSMG4--TUBB2A	chr6:3263759--chr6:3156152	1
HCC1395	ctat-LR-fusion	PSMG1--CTNNBIP1	chr21:39183252--chr1:9877989	1
HCC1395	ctat-LR-fusion	PSMD8--RP11-44N21.1	chr19:38374961--chr14:105095540	1
HCC1395	ctat-LR-fusion	PSMD7--SPTAN1	chr16:74296988--chr9:128600080	1
HCC1395	ctat-LR-fusion	PSMD12--HELZ	chr17:67366412--chr17:67138114	1
HCC1395	ctat-LR-fusion	PSMC2--ARMC10	chr7:103347781--chr7:103083682	1
HCC1395	ctat-LR-fusion	PSMA6--ABTB1	chr14:35308995--chr3:127674391	1
HCC1395	ctat-LR-fusion	PSMA5--NDUFB1	chr1:109411877--chr14:92117642	1
HCC1395	ctat-LR-fusion	PSMA3-AS1--GPI	chr14:58273979--chr19:34377503	1
HCC1395	ctat-LR-fusion	PSKH1--AARS	chr16:67909706--chr16:70282784	1
HCC1395	ctat-LR-fusion	PSIP1--PVT1	chr9:15506561--chr8:128100980	1
HCC1395	ctat-LR-fusion	PRSS23--UFL1	chr11:86823593--chr6:96542894	1
HCC1395	ctat-LR-fusion	PRR4--CRNDE	chr12:11121010--chr16:54925213	1
HCC1395	ctat-LR-fusion	PRR16--CTD-2334D19.1	chr5:120481293--chr5:120789954	1
HCC1395	ctat-LR-fusion	PRPF6--TOP1	chr20:63981316--chr20:41098215	1
HCC1395	ctat-LR-fusion	PROSER1--CHCHD3	chr13:39037198--chr7:133024627	1
HCC1395	ctat-LR-fusion	RND3--CANX	chr2:150487268--chr5:179705679	1
HCC1395	ctat-LR-fusion	PXMP2--TIMM23	chr12:132701369--chr10:46003203	1
HCC1395	ctat-LR-fusion	PXN--RPL13	chr12:120221623--chr16:89562335	1
HCC1395	ctat-LR-fusion	PSME4--SF3B1	chr2:53888721--chr2:197400936	1
HCC1395	ctat-LR-fusion	RAB18--RSU1	chr10:27509930--chr10:16782084	1
HCC1395	ctat-LR-fusion	RIMKLB--CCNI	chr12:8698297--chr4:77048662	1
HCC1395	ctat-LR-fusion	RHBDF2--CLUAP1	chr17:76500936--chr16:3504720	1
HCC1395	ctat-LR-fusion	R3HDM1--GLS	chr2:135531633--chr2:190953565	1
HCC1395	ctat-LR-fusion	RFC3--UBN2	chr13:33835217--chr7:139251956	1
HCC1395	ctat-LR-fusion	RFC1--CDK5RAP2	chr4:39366239--chr9:120403071	1
HCC1395	ctat-LR-fusion	RERE--SERPINE2	chr1:8817160--chr2:224001922	1
HCC1395	ctat-LR-fusion	RELB--CLPTM1	chr19:45001685--chr19:44985218	1
HCC1395	ctat-LR-fusion	RCN2--FAF1	chr15:76931985--chr1:50655528	1
HCC1395	ctat-LR-fusion	RCC1--STX8	chr1:28508160--chr17:9491921	1
HCC1395	ctat-LR-fusion	RCC1--CHMP4A	chr1:28508905--chr14:24211829	1
HCC1395	ctat-LR-fusion	RHBDD3--MRPL52	chr22:29265479--chr14:22834172	1
HCC1395	ctat-LR-fusion	RBM6--DDX1	chr3:49962685--chr2:15603192	1
HCC1395	ctat-LR-fusion	RBMS3--AZI2	chr3:29281756--chr3:28340622	1
HCC1395	ctat-LR-fusion	RAC1--PDXK	chr7:6392041--chr21:43734069	1
HCC1395	ctat-LR-fusion	RAD54L2--RNF139	chr3:51590559--chr8:124485831	1
HCC1395	ctat-LR-fusion	RBM12--CCNI	chr20:35658930--chr4:77066405	1
HCC1395	ctat-LR-fusion	RAD51B--DAP3	chr14:67887204--chr1:155736946	1
HCC1395	ctat-LR-fusion	RAB3GAP2--EPRS	chr1:220232799--chr1:219988823	1
HCC1395	ctat-LR-fusion	RBM19--AACS	chr12:113858791--chr12:125134003	1
HCC1395	ctat-LR-fusion	RBM23--MRPL52	chr14:22909483--chr14:22834172	1
HCC1395	ctat-LR-fusion	RBM18--COL24A1	chr9:122264715--chr1:85761566	1
DMS53	ctat-LR-fusion	RP11-208G20.2--PSPHP1	chr7:152367263--chr7:55773181	342
DMS53	ctat-LR-fusion	R3HCC1L--PGAM1	chr10:98163397--chr10:97430379	105
DMS53	ctat-LR-fusion	CECR7--bP-2189O9.3	chr22:17037344--chr21:8761276	105
DMS53	ctat-LR-fusion	RP11-208G20.2--PSPHP1	chr7:152367262--chr7:55765097	73
DMS53	ctat-LR-fusion	KRT7--OR7E47P	chr12:52245632--chr12:52107379	57
DMS53	ctat-LR-fusion	GALNT8--PRMT8	chr12:4765546--chr12:3553651	55
DMS53	ctat-LR-fusion	KRT7--OR7E47P	chr12:52248211--chr12:52107379	39
DMS53	ctat-LR-fusion	KIAA0232--CH507-513H4.1	chr4:6824684--chr21:8222961	29
DMS53	ctat-LR-fusion	HERC1--DAPK2	chr15:63833822--chr15:63908600	26
DMS53	ctat-LR-fusion	RP11-96H19.1--RP11-446N19.1	chr12:46387972--chr12:46652390	24
DMS53	ctat-LR-fusion	HERC1--DAPK2	chr15:63833827--chr15:63908600	23
DMS53	ctat-LR-fusion	RP11-6N13.1--CTD-2374C24.1	chr5:105392761--chr5:105246366	20
DMS53	ctat-LR-fusion	RP11-507B12.1--RP11-507B12.2	chr15:61715115--chr15:61635489	18
DMS53	ctat-LR-fusion	RP11-507B12.1--RP11-507B12.2	chr15:61715115--chr15:61590003	14
DMS53	ctat-LR-fusion	POC1B--MGAT4C	chr12:89525120--chr12:86838880	9
DMS53	ctat-LR-fusion	R3HCC1L--PGAM1	chr10:98163397--chr10:97426299	8
DMS53	ctat-LR-fusion	DUXAP10--LA16c-60G3.6	chr14:19062466--chr22:15541437	8
DMS53	ctat-LR-fusion	TMEM131--AC009237.2	chr2:97833365--chr2:95488629	7
DMS53	ctat-LR-fusion	AL627171.3--LRRC75A-AS1	chr14:49862641--chr17:16441714	6
DMS53	ctat-LR-fusion	GALNT8--PRMT8	chr12:4765546--chr12:3552703	6
DMS53	ctat-LR-fusion	AL139099.3--LRRC75A-AS1	chr14:49586788--chr17:16441714	6
DMS53	ctat-LR-fusion	WHSC1L1--RP11-286O1.1	chr8:38381799--chr9:42343854	6
DMS53	ctat-LR-fusion	KIAA0232--CH507-513H4.1	chr4:6782841--chr21:8222961	6
DMS53	ctat-LR-fusion	RP11-59N23.3--CMAS	chr12:21760085--chr12:22055149	5
DMS53	ctat-LR-fusion	KIF26B--EFCAB2	chr1:245646280--chr1:245087245	5
DMS53	ctat-LR-fusion	CTD-2008L17.1--RP11-456O19.2	chr18:55893442--chr18:56096075	5
DMS53	ctat-LR-fusion	AL627171.3--NONO	chr14:49862627--chrX:71300462	5
DMS53	ctat-LR-fusion	AEBP2--RP11-405A12.2	chr12:19720691--chr12:19923198	5
DMS53	ctat-LR-fusion	RP11-634B7.4--TRIM58	chr1:247640429--chr1:247860617	4
DMS53	ctat-LR-fusion	RP11-368L12.1--RP11-96H17.1	chr16:63334540--chr16:63090322	4
DMS53	ctat-LR-fusion	BAGE2--CTBP2P1	chr21:10454296--chrY:56855293	4
DMS53	ctat-LR-fusion	KRT7--OR7E47P	chr12:52245622--chr12:52107379	3
DMS53	ctat-LR-fusion	AL139099.3--LRRC75A-AS1	chr14:49586788--chr17:16441707	3
DMS53	ctat-LR-fusion	KIF26B--EFCAB2	chr1:245646280--chr1:245121920	3
DMS53	ctat-LR-fusion	KRT7--OR7E47P	chr12:52243137--chr12:52107379	3
DMS53	ctat-LR-fusion	PEX5L--STRADB	chr3:179971594--chr2:201454746	3
DMS53	ctat-LR-fusion	AL627171.3--LRRC75A-AS1	chr14:49862641--chr17:16441707	3
DMS53	ctat-LR-fusion	R3HCC1L--RP11-452K12.7	chr10:98163397--chr10:97419302	3
DMS53	ctat-LR-fusion	RP11-120D5.1--MID1	chrX:11055936--chrX:10567603	3
DMS53	ctat-LR-fusion	RP11-384F7.2--LSAMP	chr3:117997182--chr3:116444955	3
DMS53	ctat-LR-fusion	RP11-507B12.1--RP11-507B12.2	chr15:61653189--chr15:61635489	3
DMS53	ctat-LR-fusion	RP11-6N13.1--CTD-2374C24.1	chr5:105392761--chr5:105008911	3
DMS53	ctat-LR-fusion	POC1B--MGAT4C	chr12:89525120--chr12:86727241	3
DMS53	ctat-LR-fusion	C16orf96--RALBP1	chr16:4556583--chr18:9475632	2
DMS53	ctat-LR-fusion	CXorf56--THEM4	chrX:119539490--chr1:151889373	2
DMS53	ctat-LR-fusion	ELAC1--DYM	chr18:50974561--chr18:49163787	2
DMS53	ctat-LR-fusion	ENSA--PLS1	chr1:150629423--chr3:142684315	2
DMS53	ctat-LR-fusion	IFT140--RP11-186B7.4	chr16:1592176--chr17:7575119	2
DMS53	ctat-LR-fusion	INSL6--RP11-318K12.2	chr9:5164179--chr9:40789273	2
DMS53	ctat-LR-fusion	IFT140--EIF4A1	chr16:1592176--chr17:7575119	2
DMS53	ctat-LR-fusion	ARL6--NCL	chr3:97764832--chr2:231455267	2
DMS53	ctat-LR-fusion	FSD1L--LPIN2	chr9:105468324--chr18:2960849	2
DMS53	ctat-LR-fusion	HNRNPH1--FAM192A	chr5:179634065--chr16:57173869	2
DMS53	ctat-LR-fusion	AL139099.3--TCTN2	chr14:49586827--chr12:123708057	2
DMS53	ctat-LR-fusion	AL627171.3--SNHG3	chr14:49862671--chr1:28509074	2
DMS53	ctat-LR-fusion	AL627171.3--NONO	chr14:49862602--chrX:71300465	2
DMS53	ctat-LR-fusion	AL627171.3--LRRC75A-AS1	chr14:49862641--chr17:16441695	2
DMS53	ctat-LR-fusion	AL627171.3--LRRC75A-AS1	chr14:49862626--chr17:16441637	2
DMS53	ctat-LR-fusion	AL139099.3--LRRC75A-AS1	chr14:49586788--chr17:16441695	2
DMS53	ctat-LR-fusion	AL139099.3--LRRC75A-AS1	chr14:49586803--chr17:16441637	2
DMS53	ctat-LR-fusion	ABR--CDK14	chr17:1003644--chr7:91045897	2
DMS53	ctat-LR-fusion	ABR--CDK14	chr17:1003686--chr7:91045897	2
DMS53	ctat-LR-fusion	MLF2--NRD1	chr12:6752285--chr1:51798278	2
DMS53	ctat-LR-fusion	AP006621.8--TAPBP	chr11:823298--chr6:33300770	2
DMS53	ctat-LR-fusion	MNAT1--CTD-2277K2.1	chr14:60734951--chr14:61970132	2
DMS53	ctat-LR-fusion	SPC24--KANK2	chr19:11155617--chr19:11178720	2
DMS53	ctat-LR-fusion	NET1--GDI2	chr10:5412820--chr10:5773941	2
DMS53	ctat-LR-fusion	NCOR1--UBB	chr17:16215362--chr17:16381902	2
DMS53	ctat-LR-fusion	ZYX--RP11-415J8.5	chr7:143382685--chr1:33350235	2
DMS53	ctat-LR-fusion	ZNF235--MYL1	chr19:44298820--chr2:210291074	2
DMS53	ctat-LR-fusion	USP12--CDX2	chr13:27171592--chr13:27965015	2
DMS53	ctat-LR-fusion	TUBA1B--MORF4L1	chr12:49131298--chr15:78878213	2
DMS53	ctat-LR-fusion	TIAL1--FKBP9	chr10:119596434--chr7:33005175	2
DMS53	ctat-LR-fusion	TAPBP--SMIM11	chr6:33313286--chr21:7758516	2
DMS53	ctat-LR-fusion	STX18-AS1--NDUFV2	chr4:4544907--chr18:9126831	2
DMS53	ctat-LR-fusion	SPPL2B--RPL27A	chr19:2337625--chr11:8683202	2
DMS53	ctat-LR-fusion	SLC3A2--HSPB1	chr11:62884510--chr7:76304149	2
DMS53	ctat-LR-fusion	SS18L1--NOC4L	chr20:62143889--chr12:132150981	2
DMS53	ctat-LR-fusion	RPLP0--AC010524.2	chr12:120200730--chr19:49382948	2
DMS53	ctat-LR-fusion	RP13-33H18.1--FTX_2	chrX:74069584--chrX:74280394	2
DMS53	ctat-LR-fusion	RP11-6N13.1--CTD-2374C24.1	chr5:105392761--chr5:104979776	2
DMS53	ctat-LR-fusion	RP11-507B12.1--RP11-507B12.2	chr15:61715057--chr15:61300539	2
DMS53	ctat-LR-fusion	RP11-507B12.1--RP11-507B12.2	chr15:61653189--chr15:61590003	2
DMS53	ctat-LR-fusion	RP11-108M12.3--LINC00491	chr14:57112557--chr5:102671342	2
DMS53	ctat-LR-fusion	RAN--HNRNPH3	chr12:130873128--chr10:68339140	2
DMS53	ctat-LR-fusion	PKIB--HSF2	chr6:122633367--chr6:122431430	2
DMS53	ctat-LR-fusion	PEX5L--STRADB	chr3:180036579--chr2:201454746	2
DMS53	ctat-LR-fusion	SAMD12-AS1--COLEC10	chr8:118764384--chr8:119089680	2
DMS53	ctat-LR-fusion	pk--YLPM1	chr2:173091190--chr14:74824256	1
DMS53	ctat-LR-fusion	HECTD3--ST7	chr1:45010201--chr7:117229762	1
DMS53	ctat-LR-fusion	HEATR5A--ARHGAP5	chr14:31420472--chr14:32090502	1
DMS53	ctat-LR-fusion	HDLBP--GLRX3	chr2:241315570--chr10:130179342	1
DMS53	ctat-LR-fusion	HDHD3--PPP6C	chr9:113376729--chr9:125171180	1
DMS53	ctat-LR-fusion	HDAC2--KIAA0895	chr6:113970857--chr7:36335178	1
DMS53	ctat-LR-fusion	HAUS3--TAX1BP1	chr4:2241520--chr7:27827738	1
DMS53	ctat-LR-fusion	HADHA--TSGA10	chr2:26230192--chr2:99117759	1
DMS53	ctat-LR-fusion	HADHA--FAM154B	chr2:26230192--chr15:82265569	1
DMS53	ctat-LR-fusion	H3F3B--PRPF8	chr17:75779657--chr17:1656565	1
DMS53	ctat-LR-fusion	H3F3A--RPS27A	chr1:226062811--chr2:55232808	1
DMS53	ctat-LR-fusion	GXYLT1--TBC1D15	chr12:42144426--chr12:71893222	1
DMS53	ctat-LR-fusion	GUSBP1--DAAM1	chr5:21461866--chr14:59263441	1
DMS53	ctat-LR-fusion	GULP1--OLA1	chr2:188292166--chr2:174123675	1
DMS53	ctat-LR-fusion	GSTCD--PPA2	chr4:105729499--chr4:105456745	1
DMS53	ctat-LR-fusion	HELZ--RAB5A	chr17:67167463--chr3:19976047	1
DMS53	ctat-LR-fusion	GPSM2--SUPT20H	chr1:108904254--chr13:37012297	1
DMS53	ctat-LR-fusion	GPR157--TAF12	chr1:9128645--chr1:28622165	1
DMS53	ctat-LR-fusion	GPNMB--PLS3	chr7:23273614--chrX:115634000	1
DMS53	ctat-LR-fusion	GPNMB--AL589842.1	chr7:23273614--chrX:115634000	1
DMS53	ctat-LR-fusion	GPHN--POT1	chr14:66824566--chr7:124822551	1
DMS53	ctat-LR-fusion	GPC3--PPIP5K2	chrX:133953050--chr5:103194900	1
DMS53	ctat-LR-fusion	GPBP1--DHX29	chr5:57231321--chr5:55256540	1
DMS53	ctat-LR-fusion	GPATCH8--C17orf104	chr17:44435065--chr17:44673366	1
DMS53	ctat-LR-fusion	GOSR1--ZNF207	chr17:30484770--chr17:32366665	1
DMS53	ctat-LR-fusion	GOLT1B--ETNK1	chr12:21501948--chr12:22671272	1
DMS53	ctat-LR-fusion	GOLGA2P7--NOL10	chr15:84229852--chr2:10644372	1
DMS53	ctat-LR-fusion	GNPAT--SEPT11	chr1:231241456--chr4:76996425	1
DMS53	ctat-LR-fusion	GNB5--RHEB	chr15:52179768--chr7:151484804	1
DMS53	ctat-LR-fusion	GMPR--OXCT1	chr6:16254735--chr5:41739491	1
DMS53	ctat-LR-fusion	GMNN--RPL17	chr6:24775112--chr18:49490927	1
DMS53	ctat-LR-fusion	GPR157--XPOT	chr1:9128645--chr12:64409962	1
DMS53	ctat-LR-fusion	HEPACAM2--CCNL2	chr7:93226368--chr1:1390865	1
DMS53	ctat-LR-fusion	HEPACAM2--MRE11A	chr7:93226368--chr11:94459581	1
DMS53	ctat-LR-fusion	HERC1--BTBD2	chr15:63833822--chr19:1997463	1
DMS53	ctat-LR-fusion	IGF2R--RNPC3	chr6:160090103--chr1:103555034	1
DMS53	ctat-LR-fusion	IFT140--FAF1	chr16:1589605--chr1:50596216	1
DMS53	ctat-LR-fusion	HTT--TRA2B	chr4:3160392--chr3:185926734	1
DMS53	ctat-LR-fusion	HSPBP1--INTS1	chr19:55274398--chr7:1480441	1
DMS53	ctat-LR-fusion	HSPBP1--HNRNPH3	chr19:55274398--chr10:68337199	1
DMS53	ctat-LR-fusion	HSPA4L--MTX2	chr4:127808129--chr2:176296860	1
DMS53	ctat-LR-fusion	HSP90B1--HMGN5	chr12:103930564--chrX:81115230	1
DMS53	ctat-LR-fusion	HSDL1--VPS29	chr16:84129548--chr12:110493231	1
DMS53	ctat-LR-fusion	HSD17B11--LINC01191	chr4:87390861--chr2:114007019	1
DMS53	ctat-LR-fusion	HS2ST1--ZC3H13	chr1:86915160--chr13:46020557	1
DMS53	ctat-LR-fusion	HS2ST1--TBC1D30	chr1:86915160--chr12:64827835	1
DMS53	ctat-LR-fusion	HPRT1--RP11-849H4.2	chrX:134498436--chr11:71865854	1
DMS53	ctat-LR-fusion	HOOK3--VPS35	chr8:42906258--chr16:46683606	1
DMS53	ctat-LR-fusion	HOOK3--FUS	chr8:42943445--chr16:31188325	1
DMS53	ctat-LR-fusion	HNRNPH1--TUBGCP6	chr5:179634065--chr22:50220015	1
DMS53	ctat-LR-fusion	HNRNPH1--TNRC6B	chr5:179634065--chr22:40156115	1
DMS53	ctat-LR-fusion	HNRNPH1--RUFY1	chr5:179634065--chr5:179601892	1
DMS53	ctat-LR-fusion	HIAT1--PICALM	chr1:100038316--chr11:85959060	1
DMS53	ctat-LR-fusion	HIST1H2BB--C7orf50	chr6:26123773--chr7:997804	1
DMS53	ctat-LR-fusion	HIST1H2BC--ZNF652	chr6:26123515--chr17:49312845	1
DMS53	ctat-LR-fusion	HIVEP3--EIF3E	chr1:41628749--chr8:108229195	1
DMS53	ctat-LR-fusion	HIVEP3--STK3	chr1:41918413--chr8:98548161	1
DMS53	ctat-LR-fusion	HLTF--OIP5-AS1	chr3:149039049--chr15:41298041	1
DMS53	ctat-LR-fusion	GMNN--C18orf32	chr6:24775112--chr18:49490927	1
DMS53	ctat-LR-fusion	HMGN3--COX7A2	chr6:79234546--chr6:75241265	1
DMS53	ctat-LR-fusion	HNF4A--MYBL2	chr20:44355853--chr20:43699757	1
DMS53	ctat-LR-fusion	HNRNPA1--GAS5	chr12:54282874--chr1:173864506	1
DMS53	ctat-LR-fusion	HNRNPA2B1--OSBPL3	chr7:26200572--chr7:24892621	1
DMS53	ctat-LR-fusion	HNRNPA3--JMJD1C	chr2:177216188--chr10:63197563	1
DMS53	ctat-LR-fusion	HNRNPH1--ATP13A3	chr5:179623037--chr3:194413839	1
DMS53	ctat-LR-fusion	HNRNPH1--RPS6KC1	chr5:179634065--chr1:213242569	1
DMS53	ctat-LR-fusion	HNF1A-AS1--AVIL	chr12:120980644--chr12:57816059	1
DMS53	ctat-LR-fusion	GMDS-AS1--URI1	chr6:2399037--chr19:29971193	1
DMS53	ctat-LR-fusion	GMDS-AS1--TTC3	chr6:2248926--chr21:37108392	1
DMS53	ctat-LR-fusion	GMDS-AS1--CADPS2	chr6:2269799--chr7:122513315	1
DMS53	ctat-LR-fusion	FBLN7--SMCO4	chr2:112138730--chr11:93499348	1
DMS53	ctat-LR-fusion	FBLN7--NOVA1-AS1	chr2:112185339--chr14:26797914	1
DMS53	ctat-LR-fusion	FANCL--SCLT1	chr2:58198594--chr4:129003876	1
DMS53	ctat-LR-fusion	FANCL--ACYP2	chr2:58198594--chr2:54050958	1
DMS53	ctat-LR-fusion	FANCA--RFC3	chr16:89814520--chr13:33835148	1
DMS53	ctat-LR-fusion	FAM96A--UBE2E3	chr15:64088687--chr2:181057693	1
DMS53	ctat-LR-fusion	FAM83H-AS1--ACTG1	chr8:143739948--chr17:81512360	1
DMS53	ctat-LR-fusion	FAM66C--BRCA2	chr12:8188535--chr13:32394689	1
DMS53	ctat-LR-fusion	FAM53C--TIMMDC1	chr5:138341866--chr3:119500695	1
DMS53	ctat-LR-fusion	FAM3C--CUL1	chr7:121396162--chr7:148729962	1
DMS53	ctat-LR-fusion	FAM32A--CHAF1A	chr19:16185765--chr19:4442245	1
DMS53	ctat-LR-fusion	FAM230C--MTCP1	chr13:18195411--chrX:155064033	1
DMS53	ctat-LR-fusion	FAM230C--MRPL45	chr13:18195411--chr17:38318687	1
DMS53	ctat-LR-fusion	FAM230C--LMBRD1	chr13:18195411--chr6:69719081	1
DMS53	ctat-LR-fusion	FAM230C--CMC4	chr13:18195411--chrX:155064033	1
DMS53	ctat-LR-fusion	FAM230C--ATP6V1H	chr13:18195411--chr8:53756656	1
DMS53	ctat-LR-fusion	FAM222B--CLEC2D	chr17:28834293--chr12:9680923	1
DMS53	ctat-LR-fusion	EXOC6B--CMC2	chr2:72825798--chr16:80981877	1
DMS53	ctat-LR-fusion	EXOSC8--STRBP	chr13:37004561--chr9:123184298	1
DMS53	ctat-LR-fusion	EXPH5--ANKRD49	chr11:108593418--chr11:94498071	1
DMS53	ctat-LR-fusion	EZH2--MEST	chr7:148884164--chr7:130495368	1
DMS53	ctat-LR-fusion	FAAH--CFL1	chr1:46394543--chr11:65856242	1
DMS53	ctat-LR-fusion	FAM104A--ASUN	chr17:73232086--chr12:26914532	1
DMS53	ctat-LR-fusion	FBXO42--NECAP2	chr1:16305803--chr1:16458842	1
DMS53	ctat-LR-fusion	FAM104A--PTGES3	chr17:73232086--chr12:56673065	1
DMS53	ctat-LR-fusion	FAM110B--YTHDF3	chr8:58031703--chr8:63209683	1
DMS53	ctat-LR-fusion	FAM117B--CFLAR	chr2:202759353--chr2:201140357	1
DMS53	ctat-LR-fusion	FAM135A--MKLN1	chr6:70502791--chr7:131478623	1
DMS53	ctat-LR-fusion	FAM160A1--UGT8	chr4:151409465--chr4:114622879	1
DMS53	ctat-LR-fusion	FAM168A--PAAF1	chr11:73597923--chr11:73887354	1
DMS53	ctat-LR-fusion	FAM219A--NAA38	chr9:34458204--chr17:7857198	1
DMS53	ctat-LR-fusion	FAM104A--SMARCA4	chr17:73232086--chr19:10984121	1
DMS53	ctat-LR-fusion	IMMP2L--SKIV2L	chr7:111487238--chr6:31969515	1
DMS53	ctat-LR-fusion	FBXO42--SRRM1	chr1:16352255--chr1:24648859	1
DMS53	ctat-LR-fusion	FBXW11--EVA1A	chr5:171996890--chr2:75493609	1
DMS53	ctat-LR-fusion	GMCL1--NBEA	chr2:69841039--chr13:35069908	1
DMS53	ctat-LR-fusion	GK5--MYBL1	chr3:142165638--chr8:66602523	1
DMS53	ctat-LR-fusion	GFPT1--RHEB	chr2:69387065--chr7:151491014	1
DMS53	ctat-LR-fusion	GDAP1--FLJ39080	chr8:74363053--chr8:74612853	1
DMS53	ctat-LR-fusion	GCSH--MDH2	chr16:81090601--chr7:76060373	1
DMS53	ctat-LR-fusion	GCA--PSMD14	chr2:162347742--chr2:161367478	1
DMS53	ctat-LR-fusion	GBX1--CCDC57	chr7:151174616--chr17:82101866	1
DMS53	ctat-LR-fusion	GATAD2B--NDUFS6	chr1:153922733--chr5:1814339	1
DMS53	ctat-LR-fusion	GATAD2B--HSD17B14	chr1:153922733--chr19:48815141	1
DMS53	ctat-LR-fusion	GAS2L3--NAP1L1	chr12:100612141--chr12:76074239	1
DMS53	ctat-LR-fusion	GAS2--AFG3L2	chr11:22755953--chr18:12371691	1
DMS53	ctat-LR-fusion	GALNT8--HAUS1	chr12:4765546--chr18:46118181	1
DMS53	ctat-LR-fusion	GALNT8--EEF1B2	chr12:4765546--chr2:206162489	1
DMS53	ctat-LR-fusion	GALNT8--BAZ2B	chr12:4765546--chr2:159386607	1
DMS53	ctat-LR-fusion	GABPB1--CYB5A	chr15:50354985--chr18:74263477	1
DMS53	ctat-LR-fusion	G3BP2--CCNI	chr4:75673208--chr4:77066405	1
DMS53	ctat-LR-fusion	G2E3--KTN1	chr14:30559272--chr14:55612019	1
DMS53	ctat-LR-fusion	FDFT1--TIAL1	chr8:11809850--chr10:119576905	1
DMS53	ctat-LR-fusion	FDFT1--YWHAE	chr8:11802931--chr17:1365058	1
DMS53	ctat-LR-fusion	FECH--YARS	chr18:57573246--chr1:32776091	1
DMS53	ctat-LR-fusion	FGF14-IT1--FGF14	chr13:102393758--chr13:101875296	1
DMS53	ctat-LR-fusion	FLAD1--HSD17B14	chr1:154984066--chr19:48815141	1
DMS53	ctat-LR-fusion	FNBP4--GSPT1	chr11:47765270--chr16:11898035	1
DMS53	ctat-LR-fusion	FBXO42--UBE2D2	chr1:16352255--chr5:139600372	1
DMS53	ctat-LR-fusion	FNTA--PFDN1	chr8:43056546--chr5:140246057	1
DMS53	ctat-LR-fusion	FRYL--ITGB1	chr4:48780078--chr10:32935558	1
DMS53	ctat-LR-fusion	FSCN2--PKN2	chr17:81529357--chr1:88804846	1
DMS53	ctat-LR-fusion	FSD1L--CCDC14	chr9:105484502--chr3:123915718	1
DMS53	ctat-LR-fusion	FSIP2-AS1--AATF	chr2:185788766--chr17:37019005	1
DMS53	ctat-LR-fusion	FSTL5--CPE	chr4:161538166--chr4:165464390	1
DMS53	ctat-LR-fusion	FTSJ1--ARRB1	chrX:48479116--chr11:75284279	1
DMS53	ctat-LR-fusion	FO538757.2--DNMT1	chr1:195263--chr19:10182077	1
DMS53	ctat-LR-fusion	INPP4B--POLR2I	chr4:142237864--chr19:36114713	1
DMS53	ctat-LR-fusion	INSL6--RP11-318K12.2	chr9:5133425--chr9:40806096	1
DMS53	ctat-LR-fusion	INTS4--PHF10	chr11:77978996--chr6:169721111	1
DMS53	ctat-LR-fusion	MSR1--TUSC3	chr8:16256244--chr8:15764203	1
DMS53	ctat-LR-fusion	MSMB--RAB6A	chr10:46039986--chr11:73730823	1
DMS53	ctat-LR-fusion	MSL2--PCCB	chr3:136196150--chr3:136255856	1
DMS53	ctat-LR-fusion	MSH6--ATP1B3	chr2:47791123--chr3:141903620	1
DMS53	ctat-LR-fusion	MSH2--SRSF7	chr2:47403402--chr2:38750194	1
DMS53	ctat-LR-fusion	MRPL52--DYNLRB1	chr14:22833489--chr20:34540581	1
DMS53	ctat-LR-fusion	MORN4--ZDHHC16	chr10:97617208--chr10:97453618	1
DMS53	ctat-LR-fusion	MLLT10--RPL26	chr10:21595440--chr17:8377692	1
DMS53	ctat-LR-fusion	MKL1--XRCC6	chr22:40552106--chr22:41636113	1
DMS53	ctat-LR-fusion	MIR99AHG--DONSON	chr21:16537439--chr21:33579562	1
DMS53	ctat-LR-fusion	MIR17HG--PHF14	chr13:91349770--chr7:11111350	1
DMS53	ctat-LR-fusion	MINOS1--CAPZB	chr1:19597109--chr1:19419750	1
DMS53	ctat-LR-fusion	MIER1--ITGB3BP	chr1:66946295--chr1:63441103	1
DMS53	ctat-LR-fusion	MICAL3--FOLH1	chr22:18024281--chr11:49206172	1
DMS53	ctat-LR-fusion	MGST1--RPS17	chr12:16383604--chr15:82538371	1
DMS53	ctat-LR-fusion	MGST1--DHX29	chr12:16383604--chr5:55281515	1
DMS53	ctat-LR-fusion	MGAT4A--NDFIP2	chr2:98655445--chr13:79520810	1
DMS53	ctat-LR-fusion	MAPKAP1--PBX3	chr9:125706971--chr9:125929655	1
DMS53	ctat-LR-fusion	MAPKAPK5--UCHL1	chr12:111871180--chr4:41267987	1
DMS53	ctat-LR-fusion	MARCH1--GNG5	chr4:163854021--chr1:84501970	1
DMS53	ctat-LR-fusion	MAT2B--TRAPPC9	chr5:163505749--chr8:140024079	1
DMS53	ctat-LR-fusion	MCFD2--PSMA3	chr2:46907810--chr14:58263705	1
DMS53	ctat-LR-fusion	MCM3--RPS11	chr6:52282045--chr19:49499512	1
DMS53	ctat-LR-fusion	MTDH--RP11-488L18.4	chr8:97644887--chr1:247200193	1
DMS53	ctat-LR-fusion	MCMDC2--INTS8	chr8:66874249--chr8:94876221	1
DMS53	ctat-LR-fusion	MED23--RP11-631N16.2	chr6:131618407--chr12:62613605	1
DMS53	ctat-LR-fusion	MED31--PTTG1	chr17:6650356--chr5:160422302	1
DMS53	ctat-LR-fusion	MEF2A--LRRC28	chr15:99566104--chr15:99386030	1
DMS53	ctat-LR-fusion	MEF2A--RPS18	chr15:99633173--chr6:33272628	1
DMS53	ctat-LR-fusion	METTL21A--TAF1D	chr2:207621806--chr11:93730712	1
DMS53	ctat-LR-fusion	MGAT4A--MRPL30	chr2:98726239--chr2:99194751	1
DMS53	ctat-LR-fusion	MCTP2--ZNF638	chr15:94231664--chr2:71422814	1
DMS53	ctat-LR-fusion	MAP3K7--MORF4L2-AS1	chr6:90561622--chrX:103691419	1
DMS53	ctat-LR-fusion	MTF2--SFPQ	chr1:93079531--chr1:35178036	1
DMS53	ctat-LR-fusion	MTMR4--PRPF4B	chr17:58511429--chr6:4064801	1
DMS53	ctat-LR-fusion	NLRP1--STAT5A	chr17:5619331--chr17:42295619	1
DMS53	ctat-LR-fusion	NHLRC3--MTRR	chr13:39039711--chr5:7899914	1
DMS53	ctat-LR-fusion	NFE2L2--MTX2	chr2:177264532--chr2:176328293	1
DMS53	ctat-LR-fusion	NFE2L2--MAP4K4	chr2:177264532--chr2:101855977	1
DMS53	ctat-LR-fusion	NEK7--TBCE	chr1:198157276--chr1:235434204	1
DMS53	ctat-LR-fusion	NEK6--GLRX5	chr9:124302054--chr14:95543947	1
DMS53	ctat-LR-fusion	NDUFAF6--CTBP2	chr8:94895927--chr10:125003492	1
DMS53	ctat-LR-fusion	NDUFA4--MAD1L1	chr7:10940016--chr7:2149238	1
DMS53	ctat-LR-fusion	NDUFA13--PABPC1	chr19:19527770--chr8:100717888	1
DMS53	ctat-LR-fusion	NDUFA13--GANAB	chr19:19516332--chr11:62639731	1
DMS53	ctat-LR-fusion	NDUFA12--ZNF407	chr12:95002739--chr18:74630967	1
DMS53	ctat-LR-fusion	NDUFA10--ZNF138	chr2:240005210--chr7:64831451	1
DMS53	ctat-LR-fusion	NDC1--SCPEP1	chr1:53838205--chr17:57000855	1
DMS53	ctat-LR-fusion	NCOR1--PARN	chr17:16215362--chr16:14555709	1
DMS53	ctat-LR-fusion	NCOA4--LSM8	chr10:46015126--chr7:118185647	1
DMS53	ctat-LR-fusion	NCOA4--ARHGAP5	chr10:46015126--chr14:32090502	1
DMS53	ctat-LR-fusion	NCAM1--NDUFA9	chr11:112961664--chr12:4654292	1
DMS53	ctat-LR-fusion	MTRF1--CDC123	chr13:41262411--chr10:12249581	1
DMS53	ctat-LR-fusion	MTX2--UBE2E3	chr2:176297895--chr2:181075496	1
DMS53	ctat-LR-fusion	MVB12B--PBX3	chr9:126421948--chr9:125929655	1
DMS53	ctat-LR-fusion	MYH9--PDXP	chr22:36387807--chr22:37665555	1
DMS53	ctat-LR-fusion	MYH9--SH3BP1	chr22:36387807--chr22:37665555	1
DMS53	ctat-LR-fusion	MYL12B--KIAA1429	chr18:3273082--chr8:94490082	1
DMS53	ctat-LR-fusion	MTIF2--UBE2D2	chr2:55262316--chr5:139623368	1
DMS53	ctat-LR-fusion	MYO19--UBE2D2	chr17:36532527--chr5:139600372	1
DMS53	ctat-LR-fusion	NAA20--PHF14	chr20:20026919--chr7:11110525	1
DMS53	ctat-LR-fusion	NAA35--AGTPBP1	chr9:85942283--chr9:85633374	1
DMS53	ctat-LR-fusion	NAA38--ARHGEF7	chr17:7883235--chr13:111288354	1
DMS53	ctat-LR-fusion	NAA50--LYRM4	chr3:113745942--chr6:5216738	1
DMS53	ctat-LR-fusion	NBPF1--DYM	chr1:16608508--chr18:49044204	1
DMS53	ctat-LR-fusion	NCALD--APMAP	chr8:102020237--chr20:24964022	1
DMS53	ctat-LR-fusion	NAA20--OGFOD2	chr20:20022480--chr12:122978325	1
DMS53	ctat-LR-fusion	EXOC4--SLC35B4	chr7:133895735--chr7:134294961	1
DMS53	ctat-LR-fusion	MACF1--TUBGCP6	chr1:39468732--chr22:50220015	1
DMS53	ctat-LR-fusion	LYPLAL1--ERGIC2	chr1:219179246--chr12:29357724	1
DMS53	ctat-LR-fusion	LA16c-325D7.1--RP11-29H23.4	chr16:2858658--chr1:155609892	1
DMS53	ctat-LR-fusion	KMT2E--LINC01004	chr7:105091314--chr7:104953906	1
DMS53	ctat-LR-fusion	KLRG2--PSPHP1	chr7:139479627--chr7:55773181	1
DMS53	ctat-LR-fusion	KLK13--PTGES3	chr19:51063586--chr12:56673065	1
DMS53	ctat-LR-fusion	KLC3--CRNDE	chr19:45340846--chr16:54925213	1
DMS53	ctat-LR-fusion	KIF2A--THOC2	chr5:62306536--chrX:123712908	1
DMS53	ctat-LR-fusion	KIF26B--EFCAB2	chr1:245156683--chr1:245121920	1
DMS53	ctat-LR-fusion	KIAA1551--METTL25	chr12:31970356--chr12:82434695	1
DMS53	ctat-LR-fusion	KIAA1377--C1orf168	chr11:101915412--chr1:56738653	1
DMS53	ctat-LR-fusion	KCNH7--UBR3	chr2:162836537--chr2:169986645	1
DMS53	ctat-LR-fusion	KCNH7--COBLL1	chr2:162836537--chr2:164686032	1
DMS53	ctat-LR-fusion	KCNAB2--OSBPL2	chr1:5992788--chr20:62256057	1
DMS53	ctat-LR-fusion	KATNBL1--PFDN1	chr15:34209951--chr5:140281533	1
DMS53	ctat-LR-fusion	KAT8--UQCRH	chr16:31120514--chr1:46316552	1
DMS53	ctat-LR-fusion	KAT6B--GAS5	chr10:75025249--chr1:173865547	1
DMS53	ctat-LR-fusion	KANSL1--HMGB1	chr17:46223671--chr13:30463694	1
DMS53	ctat-LR-fusion	JPX--RPS6KA6	chrX:73944662--chrX:84107725	1
DMS53	ctat-LR-fusion	IPO8--RP11-702H23.4	chr12:30673990--chr11:74485625	1
DMS53	ctat-LR-fusion	IPO8--TMPO	chr12:30690496--chr12:98544230	1
DMS53	ctat-LR-fusion	ISCU--DCTD	chr12:108562736--chr4:182915575	1
DMS53	ctat-LR-fusion	IST1--NEMF	chr16:71895589--chr14:49795944	1
DMS53	ctat-LR-fusion	ITFG2--NSUN5P2	chr12:2812856--chr7:72950196	1
DMS53	ctat-LR-fusion	ITGB3BP--ALG6	chr1:63523129--chr1:63411926	1
DMS53	ctat-LR-fusion	LARP4--ATF1	chr12:50401028--chr12:50814010	1
DMS53	ctat-LR-fusion	ITGB8--AC005062.2	chr7:20381885--chr7:19919977	1
DMS53	ctat-LR-fusion	ITPR2--PPHLN1	chr12:26832690--chr12:42374863	1
DMS53	ctat-LR-fusion	ITPR2--TM7SF3	chr12:26832690--chr12:27003390	1
DMS53	ctat-LR-fusion	ITSN2--RUNX1T1	chr2:24328052--chr8:91970848	1
DMS53	ctat-LR-fusion	JAK1--ST18	chr1:64966333--chr8:52149977	1
DMS53	ctat-LR-fusion	JARID2--DTNBP1	chr6:15248964--chr6:15524669	1
DMS53	ctat-LR-fusion	JAZF1--MON2	chr7:27991909--chr12:62565237	1
DMS53	ctat-LR-fusion	ITPR2--CEP44	chr12:26790157--chr4:174331482	1
DMS53	ctat-LR-fusion	LYPLAL1--SCYL3	chr1:219173981--chr1:169878819	1
DMS53	ctat-LR-fusion	LARP4--RNPEP	chr12:50454417--chr1:201996147	1
DMS53	ctat-LR-fusion	LCOR--HMGB3	chr10:96832399--chrX:150985595	1
DMS53	ctat-LR-fusion	LUC7L--RPS2	chr16:229279--chr16:1962270	1
DMS53	ctat-LR-fusion	LSM8--OGFOD2	chr7:118184254--chr12:122978325	1
DMS53	ctat-LR-fusion	LRRTM4--GOLGA4	chr2:77592815--chr3:37347193	1
DMS53	ctat-LR-fusion	LRRC75A-AS1--UBE2D2	chr17:16439414--chr5:139600372	1
DMS53	ctat-LR-fusion	LRRC75A-AS1--CH507-528H12.1	chr17:16439414--chr21:8405960	1
DMS53	ctat-LR-fusion	LRPAP1--WASH1	chr4:3524907--chr9:15149	1
DMS53	ctat-LR-fusion	LRP5--GPT2	chr11:68390052--chr16:46897648	1
DMS53	ctat-LR-fusion	LPP--OPRL1	chr3:188609844--chr20:64092688	1
DMS53	ctat-LR-fusion	LPP--IWS1	chr3:188225527--chr2:127496148	1
DMS53	ctat-LR-fusion	LONP2--VPS35	chr16:48277479--chr16:46683606	1
DMS53	ctat-LR-fusion	LOH12CR1--PRPF31	chr12:12357509--chr19:54128073	1
DMS53	ctat-LR-fusion	LNX1-AS2--UBE2R2	chr4:53593072--chr9:33886881	1
DMS53	ctat-LR-fusion	LMO3--RNF146	chr12:16560413--chr6:127280231	1
DMS53	ctat-LR-fusion	LIPT1--C12orf5	chr2:99156426--chr12:4337039	1
DMS53	ctat-LR-fusion	LINC01252--ATP6V0A1	chr12:11552693--chr17:42466429	1
DMS53	ctat-LR-fusion	LINC01242--LINGO2	chr9:30446696--chr9:28012405	1
DMS53	ctat-LR-fusion	LINC01135--PHF14	chr1:58785305--chr7:11111350	1
DMS53	ctat-LR-fusion	LGALS3BP--PGM5	chr17:78979824--chr9:68378199	1
DMS53	ctat-LR-fusion	LHFPL2--SPIDR	chr5:78564813--chr8:47712662	1
DMS53	ctat-LR-fusion	LIMCH1--SMAP1	chr4:41360936--chr6:70798657	1
DMS53	ctat-LR-fusion	LIN9--CBX3	chr1:226297719--chr7:26211662	1
DMS53	ctat-LR-fusion	LIN9--ZDHHC13	chr1:226250839--chr11:19172723	1
DMS53	ctat-LR-fusion	LINC00152--SFPQ	chr2:87455645--chr1:35178036	1
DMS53	ctat-LR-fusion	LCLAT1--FANCL	chr2:30447383--chr2:58222042	1
DMS53	ctat-LR-fusion	LINC00265--CDK13	chr7:39734044--chr7:39997494	1
DMS53	ctat-LR-fusion	LINC00665--RP11-218M22.1	chr19:36315957--chr12:643959	1
DMS53	ctat-LR-fusion	LINC00665--TRAF2	chr19:36315957--chr9:136898713	1
DMS53	ctat-LR-fusion	LINC00680--XIAP	chr6:57959028--chrX:123885631	1
DMS53	ctat-LR-fusion	LINC01106--NAB1	chr2:110384315--chr2:190649846	1
DMS53	ctat-LR-fusion	LINC01106--SAE1	chr2:110384315--chr19:47169818	1
DMS53	ctat-LR-fusion	LINC01123--RP11-313J2.1	chr2:109987190--chr10:42340556	1
DMS53	ctat-LR-fusion	LINC00662--ATRAID	chr19:27793000--chr2:27213177	1
DMS53	ctat-LR-fusion	ETV5--STMN1	chr3:186108940--chr1:25904738	1
DMS53	ctat-LR-fusion	ETNK1--MRPS35	chr12:22625586--chr12:27735447	1
DMS53	ctat-LR-fusion	ESRRG--PHF14	chr1:216650973--chr7:11111350	1
DMS53	ctat-LR-fusion	C19orf25--TCF3	chr19:1478774--chr19:1650287	1
DMS53	ctat-LR-fusion	C18orf32--TMEM9B-AS1	chr18:49489359--chr11:8965904	1
DMS53	ctat-LR-fusion	C18orf32--RNF149	chr18:49489359--chr2:101271744	1
DMS53	ctat-LR-fusion	C16orf74--GTF2H2B	chr16:85750926--chr5:70427585	1
DMS53	ctat-LR-fusion	C12orf76--FKBP4	chr12:110048363--chr12:2799088	1
DMS53	ctat-LR-fusion	C12orf5--SHB	chr12:4331317--chr9:37974837	1
DMS53	ctat-LR-fusion	C11orf70--RPL11	chr11:102047896--chr1:23692609	1
DMS53	ctat-LR-fusion	BZW2--FBXO38	chr7:16674588--chr5:148433424	1
DMS53	ctat-LR-fusion	BUB1--MCM6	chr2:110642119--chr2:135848188	1
DMS53	ctat-LR-fusion	BTRC--ACOT7	chr10:101354228--chr1:6349866	1
DMS53	ctat-LR-fusion	BTBD3--FAM60A	chr20:11890954--chr12:31305123	1
DMS53	ctat-LR-fusion	BSG--SQSTM1	chr19:572701--chr5:179822958	1
DMS53	ctat-LR-fusion	BRWD1--FASTKD1	chr21:39298432--chr2:169544835	1
DMS53	ctat-LR-fusion	BRWD1--EIF4G3	chr21:39312841--chr1:20813239	1
DMS53	ctat-LR-fusion	BRWD1--ATL2	chr21:39298432--chr2:38343512	1
DMS53	ctat-LR-fusion	BPTF--NAP1L1	chr17:67826337--chr12:76053110	1
DMS53	ctat-LR-fusion	BOP1--SSBP3	chr8:144276224--chr1:54404930	1
DMS53	ctat-LR-fusion	ATG16L2--CERS2	chr11:72817855--chr1:150969091	1
DMS53	ctat-LR-fusion	ATP2A2--ISCU	chr12:110282795--chr12:108564279	1
DMS53	ctat-LR-fusion	ATP2C1--ZZZ3	chr3:130894775--chr1:77584655	1
DMS53	ctat-LR-fusion	ATP6V0A1--CBX1	chr17:42501304--chr17:48077041	1
DMS53	ctat-LR-fusion	AUH--IARS	chr9:91355883--chr9:92229126	1
DMS53	ctat-LR-fusion	B2M--DHRSX	chr15:44711613--chrX:2425304	1
DMS53	ctat-LR-fusion	C19orf25--ZNF706	chr19:1478774--chr8:101201743	1
DMS53	ctat-LR-fusion	B3GALNT2--USP14	chr1:235504141--chr18:163308	1
DMS53	ctat-LR-fusion	BAG6--CLIC1	chr6:31651656--chr6:31731003	1
DMS53	ctat-LR-fusion	BAZ2B--STIM2	chr2:159555823--chr4:27017711	1
DMS53	ctat-LR-fusion	BCAS3--TMEM222	chr17:60887211--chr1:27332070	1
DMS53	ctat-LR-fusion	BCL9--OTUD7B	chr1:147541674--chr1:149977576	1
DMS53	ctat-LR-fusion	BMPR2--ABI2	chr2:202467689--chr2:203402576	1
DMS53	ctat-LR-fusion	BOP1--PTOV1	chr8:144276224--chr19:49854406	1
DMS53	ctat-LR-fusion	B3GNT8--EEF1D	chr19:41427284--chr8:143586849	1
DMS53	ctat-LR-fusion	ATF2--OLA1	chr2:175168050--chr2:174123675	1
DMS53	ctat-LR-fusion	C2CD3--DDX10	chr11:74168344--chr11:108852153	1
DMS53	ctat-LR-fusion	C5orf30--PAM	chr5:103265997--chr5:102949537	1
DMS53	ctat-LR-fusion	CCNJ--AASDHPPT	chr10:96050466--chr11:106094583	1
DMS53	ctat-LR-fusion	CCDC91--DMD	chr12:28190641--chrX:32595876	1
DMS53	ctat-LR-fusion	CCDC84--RHEB	chr11:118999109--chr7:151491014	1
DMS53	ctat-LR-fusion	CCDC82--RFWD2	chr11:96387530--chr1:176085890	1
DMS53	ctat-LR-fusion	CCDC6--TMBIM6	chr10:59852553--chr12:49752464	1
DMS53	ctat-LR-fusion	CCDC23--PTPRN2	chr1:42816431--chr7:158081377	1
DMS53	ctat-LR-fusion	CCDC183--SCRIB	chr9:136802786--chr8:143791440	1
DMS53	ctat-LR-fusion	CCDC18--DEPDC1	chr1:93180852--chr1:68479320	1
DMS53	ctat-LR-fusion	CCAR1--PABPC1	chr10:68757377--chr8:100705673	1
DMS53	ctat-LR-fusion	CBX5--LATS1	chr12:54280008--chr6:149680457	1
DMS53	ctat-LR-fusion	CBX1--KIAA1109	chr17:48101268--chr4:122304798	1
DMS53	ctat-LR-fusion	CBX1--C6orf48	chr17:48101268--chr6:31837236	1
DMS53	ctat-LR-fusion	CAST--CHD1	chr5:96675601--chr5:98901335	1
DMS53	ctat-LR-fusion	CAPZA1--HABP4	chr1:112619883--chr9:96458379	1
DMS53	ctat-LR-fusion	CAPN5--OXA1L	chr11:77093813--chr14:22770461	1
DMS53	ctat-LR-fusion	CAMTA1--SKP1	chr1:6871840--chr5:134174022	1
DMS53	ctat-LR-fusion	CAMTA1--NDC1	chr1:6825210--chr1:53772489	1
DMS53	ctat-LR-fusion	C6orf48--EIF4A1	chr6:31837435--chr17:7577569	1
DMS53	ctat-LR-fusion	C6orf48--RP11-186B7.4	chr6:31837435--chr17:7577569	1
DMS53	ctat-LR-fusion	CA8--ASAP1	chr8:60279689--chr8:130214701	1
DMS53	ctat-LR-fusion	CACNA1B--PTPRA	chr9:138025172--chr20:2964272	1
DMS53	ctat-LR-fusion	CACNA2D1--NDFIP1	chr7:82005423--chr5:142135730	1
DMS53	ctat-LR-fusion	CADM1--AGFG1	chr11:115504271--chr2:227491547	1
DMS53	ctat-LR-fusion	C3orf17--ULK4	chr3:113019542--chr3:41717861	1
DMS53	ctat-LR-fusion	CADM1--AHRR	chr11:115504271--chr5:353730	1
DMS53	ctat-LR-fusion	CADM1--KIAA0226L	chr11:115504271--chr13:46368815	1
DMS53	ctat-LR-fusion	CADM1--PSMB7	chr11:115504271--chr9:124384656	1
DMS53	ctat-LR-fusion	CADM1--REXO2	chr11:115504271--chr11:114445979	1
DMS53	ctat-LR-fusion	CADM1--SLC4A11	chr11:115504271--chr20:3237588	1
DMS53	ctat-LR-fusion	CALR--CCDC57	chr19:12940654--chr17:82134194	1
DMS53	ctat-LR-fusion	CAMTA1--DNAJC11	chr1:7249626--chr1:6654039	1
DMS53	ctat-LR-fusion	CADM1--ATP1B3	chr11:115504271--chr3:141903620	1
DMS53	ctat-LR-fusion	CCNT2--TMEM87B	chr2:134918336--chr2:112081057	1
DMS53	ctat-LR-fusion	ATE1--WHSC1	chr10:121836718--chr4:1900626	1
DMS53	ctat-LR-fusion	ASNSP1--HOOK3	chr8:46614277--chr8:42925557	1
DMS53	ctat-LR-fusion	AFMID--EEF1G	chr17:78191060--chr11:62560454	1
DMS53	ctat-LR-fusion	ADPGK--SND1	chr15:72783459--chr7:127844324	1
DMS53	ctat-LR-fusion	ADAP1--IQCE	chr7:919968--chr7:2578242	1
DMS53	ctat-LR-fusion	ACYP2--PHF20	chr2:53973810--chr20:35800094	1
DMS53	ctat-LR-fusion	ACYP2--DHX36	chr2:53973810--chr3:154289826	1
DMS53	ctat-LR-fusion	ACTR3B--SFTA3	chr7:152825122--chr14:36491291	1
DMS53	ctat-LR-fusion	ACTB--PSMD3	chr7:5562574--chr17:39984294	1
DMS53	ctat-LR-fusion	ACSL3--UBE2V2	chr2:222887888--chr8:48043033	1
DMS53	ctat-LR-fusion	ACOT9--DLX6-AS1	chrX:23743125--chr7:96979591	1
DMS53	ctat-LR-fusion	ACADS--ZNF529-AS1	chr12:120727189--chr19:36593846	1
DMS53	ctat-LR-fusion	AC156455.1--WHSC1	chr12:122064682--chr4:1900626	1
DMS53	ctat-LR-fusion	AC096669.3--CD46	chr2:107531779--chr1:207770321	1
DMS53	ctat-LR-fusion	AC084219.4--NFE2L2	chr19:44112822--chr2:177234271	1
DMS53	ctat-LR-fusion	AC084219.4--C1orf27	chr19:44112822--chr1:186406083	1
DMS53	ctat-LR-fusion	AC084219.4--AMY2B	chr19:44112822--chr1:103571557	1
DMS53	ctat-LR-fusion	AC073283.4--TAF12	chr2:47344901--chr1:28622165	1
DMS53	ctat-LR-fusion	AC072062.1--RPS6KC1	chr2:214834105--chr1:213242569	1
DMS53	ctat-LR-fusion	ABCA11P--FAM120B	chr4:472575--chr6:170395487	1
DMS53	ctat-LR-fusion	ABCA11P--PSPHP1	chr4:472575--chr7:55773181	1
DMS53	ctat-LR-fusion	ABCA5--DEK	chr17:69327052--chr6:18237516	1
DMS53	ctat-LR-fusion	ABCA5--LARP1	chr17:69327052--chr5:154802007	1
DMS53	ctat-LR-fusion	ABCC5--DLGAP1	chr3:183987770--chr18:3729375	1
DMS53	ctat-LR-fusion	ABHD2--SUGP2	chr15:89116521--chr19:18991149	1
DMS53	ctat-LR-fusion	AGBL3--RNF145	chr7:134989310--chr5:159174158	1
DMS53	ctat-LR-fusion	ABI2--SRSF11	chr2:203427269--chr1:70222766	1
DMS53	ctat-LR-fusion	AC002116.7--COX7A2	chr19:36019384--chr6:75237988	1
DMS53	ctat-LR-fusion	AC005537.2--RBM4	chr7:43059354--chr11:66639700	1
DMS53	ctat-LR-fusion	AC006000.5--STK39	chr7:13361444--chr2:167964726	1
DMS53	ctat-LR-fusion	AC011747.4--LPCAT1	chr2:8576911--chr5:1501603	1
DMS53	ctat-LR-fusion	AC015691.13--AC104389.28	chr11:5590957--chr11:5346910	1
DMS53	ctat-LR-fusion	AC015987.1--AC009784.3	chr7:135926585--chr7:136242150	1
DMS53	ctat-LR-fusion	ABLIM2--MIA3	chr4:8029656--chr1:222665309	1
DMS53	ctat-LR-fusion	ATE1--CTBP2	chr10:121927844--chr10:125111093	1
DMS53	ctat-LR-fusion	AGPS--KLHL24	chr2:177393049--chr3:183643480	1
DMS53	ctat-LR-fusion	AHR--COMMD8	chr7:17299329--chr4:47456729	1
DMS53	ctat-LR-fusion	ASAP1--ARHGAP29	chr8:130443460--chr1:94231643	1
DMS53	ctat-LR-fusion	ARRDC3--RNF128	chr5:91382813--chrX:106772913	1
DMS53	ctat-LR-fusion	ARPC5L--NPLOC4	chr9:124864107--chr17:81629805	1
DMS53	ctat-LR-fusion	ARPC5--UCHL5	chr1:183630461--chr1:193029657	1
DMS53	ctat-LR-fusion	ARID4B--GON4L	chr1:235160511--chr1:155827028	1
DMS53	ctat-LR-fusion	ARID2--AGAP1-IT1	chr12:45821487--chr2:235506953	1
DMS53	ctat-LR-fusion	ARHGEF28--MFF	chr5:73684884--chr2:227355677	1
DMS53	ctat-LR-fusion	ARHGAP20--FSIP2	chr11:110712127--chr2:185828156	1
DMS53	ctat-LR-fusion	ARF3--AP1G1	chr12:48957310--chr16:71756159	1
DMS53	ctat-LR-fusion	ARAF--PRC1	chrX:47567432--chr15:90966653	1
DMS53	ctat-LR-fusion	APIP--FYN	chr11:34916228--chr6:111674630	1
DMS53	ctat-LR-fusion	APIP--CAST	chr11:34916228--chr5:96722639	1
DMS53	ctat-LR-fusion	AP2B1--UCHL1	chr17:35608387--chr4:41257609	1
DMS53	ctat-LR-fusion	AP1G1--HNRNPK	chr16:71753833--chr9:83969440	1
DMS53	ctat-LR-fusion	AP006621.8--FAF1	chr11:824390--chr1:50596216	1
DMS53	ctat-LR-fusion	AP003900.6--SLC25A3	chr21:10338455--chr12:98597856	1
DMS53	ctat-LR-fusion	AP000487.5--FLCN	chr11:70398098--chr17:17232901	1
DMS53	ctat-LR-fusion	AJ003147.9--NONO	chr16:3189798--chrX:71299942	1
DMS53	ctat-LR-fusion	AK2--RPL22	chr1:33024442--chr1:6197756	1
DMS53	ctat-LR-fusion	AL109763.2--TMPRSS15	chr21:18737924--chr21:18398329	1
DMS53	ctat-LR-fusion	ALDOA--COPZ2	chr16:30053499--chr17:48036925	1
DMS53	ctat-LR-fusion	ANAPC5--CTD-3006G17.2	chr12:121352134--chr14:27322141	1
DMS53	ctat-LR-fusion	ANK2--MCCC2	chr4:112904514--chr5:71646211	1
DMS53	ctat-LR-fusion	AGPS--ZNF254	chr2:177393049--chr19:24126254	1
DMS53	ctat-LR-fusion	ANKIB1--IMMP2L	chr7:92362273--chr7:111561923	1
DMS53	ctat-LR-fusion	ANKRD45--AKT2	chr1:173659091--chr19:40255269	1
DMS53	ctat-LR-fusion	ANKRD52--TAF1D	chr12:56243238--chr11:93730447	1
DMS53	ctat-LR-fusion	ANKUB1--ZNF227	chr3:149968358--chr19:44228446	1
DMS53	ctat-LR-fusion	ANO9--C9orf3	chr11:433314--chr9:95086682	1
DMS53	ctat-LR-fusion	ANO9--MMP25-AS1	chr11:430083--chr16:3053622	1
DMS53	ctat-LR-fusion	ANXA7--MICU1	chr10:73396519--chr10:72566794	1
DMS53	ctat-LR-fusion	ANKLE1--HGS	chr19:17283002--chr17:81696357	1
DMS53	ctat-LR-fusion	NME1-NME2--CHEK1	chr17:51170049--chr11:125653746	1
DMS53	ctat-LR-fusion	CCT7--PPIA	chr2:73240543--chr7:44799247	1
DMS53	ctat-LR-fusion	CD46--PGGT1B	chr1:207770362--chr5:115222008	1
DMS53	ctat-LR-fusion	DOCK1--SCPEP1	chr10:126905563--chr17:56981082	1
DMS53	ctat-LR-fusion	DNAJC8--SNX5	chr1:28228922--chr20:17957037	1
DMS53	ctat-LR-fusion	DNAJC6--C7orf49	chr1:65254649--chr7:135169060	1
DMS53	ctat-LR-fusion	DNAJC3--MNAT1	chr13:95725252--chr14:60968229	1
DMS53	ctat-LR-fusion	DNAJC12--HMGB1	chr10:67837934--chr13:30463694	1
DMS53	ctat-LR-fusion	DNAJC12--FAM65C	chr10:67823314--chr20:50609356	1
DMS53	ctat-LR-fusion	DNAH14--KCTD3	chr1:224929835--chr1:215573786	1
DMS53	ctat-LR-fusion	DNAAF5--ZNF511	chr7:727315--chr10:133312788	1
DMS53	ctat-LR-fusion	DMD--GABPA	chrX:31323598--chr21:25741573	1
DMS53	ctat-LR-fusion	DLEU2--EXOC1	chr13:50075559--chr4:55883823	1
DMS53	ctat-LR-fusion	DIP2B--LARP4	chr12:50505240--chr12:50453460	1
DMS53	ctat-LR-fusion	DIDO1--NANS	chr20:62926439--chr9:98076918	1
DMS53	ctat-LR-fusion	DHCR7--KRAS	chr11:71437812--chr12:25209911	1
DMS53	ctat-LR-fusion	DHCR7--FKBP1A	chr11:71447610--chr20:1372240	1
DMS53	ctat-LR-fusion	DHCR24--RBBP7	chr1:54883618--chrX:16852628	1
DMS53	ctat-LR-fusion	DESI2--RPS3	chr1:244692020--chr11:75404672	1
DMS53	ctat-LR-fusion	DDX5--EEF1A1	chr17:64506076--chr6:73520056	1
DMS53	ctat-LR-fusion	CUL5--YARS	chr11:108009372--chr1:32791254	1
DMS53	ctat-LR-fusion	CWF19L2--C11orf30	chr11:107454450--chr11:76472564	1
DMS53	ctat-LR-fusion	CXADR--BTG3	chr21:17513172--chr21:17609152	1
DMS53	ctat-LR-fusion	CYSTM1--MOB4	chr5:140175285--chr2:197535530	1
DMS53	ctat-LR-fusion	DACH2--PVRL3-AS1	chrX:86651167--chr3:111045909	1
DMS53	ctat-LR-fusion	DANCR--FAF1	chr4:52712959--chr1:50655528	1
DMS53	ctat-LR-fusion	DOCK4--IMMP2L	chr7:112206102--chr7:111521449	1
DMS53	ctat-LR-fusion	DAP3--FANCI	chr1:155689174--chr15:89312904	1
DMS53	ctat-LR-fusion	DCAF8--ATF6	chr1:160262276--chr1:161912296	1
DMS53	ctat-LR-fusion	DCBLD2--ORC5	chr3:98849461--chr7:104136893	1
DMS53	ctat-LR-fusion	DCLRE1C--KANSL2	chr10:14949036--chr12:48661243	1
DMS53	ctat-LR-fusion	DCTN4--UBA2	chr5:150742114--chr19:34450265	1
DMS53	ctat-LR-fusion	DCUN1D5--PSMD13	chr11:103089227--chr11:244426	1
DMS53	ctat-LR-fusion	DDX17--SH3YL1	chr22:38499400--chr2:253115	1
DMS53	ctat-LR-fusion	DCAF17--TRIP12	chr2:171443613--chr2:229771632	1
DMS53	ctat-LR-fusion	CTNND1--PHF14	chr11:57789155--chr7:11111350	1
DMS53	ctat-LR-fusion	DOCK4--PCMTD1	chr7:112206102--chr8:51833689	1
DMS53	ctat-LR-fusion	DOCK7--SSBP3	chr1:62688227--chr1:54404930	1
DMS53	ctat-LR-fusion	EPS8--STRAP	chr12:15789161--chr12:15889928	1
DMS53	ctat-LR-fusion	EPS15--ZNF431	chr1:51402435--chr19:21189865	1
DMS53	ctat-LR-fusion	EPB41L5--LRRC8B	chr2:120042110--chr1:89568247	1
DMS53	ctat-LR-fusion	EPB41--YTHDF2	chr1:29039426--chr1:28768929	1
DMS53	ctat-LR-fusion	EPB41--DLGAP5	chr1:29053312--chr14:55183753	1
DMS53	ctat-LR-fusion	ENPP4--RPS6KC1	chr6:46141222--chr1:213261558	1
DMS53	ctat-LR-fusion	ENPP1--WHSC1	chr6:131808275--chr4:1974863	1
DMS53	ctat-LR-fusion	ENOSF1--USP14	chr18:712504--chr18:178933	1
DMS53	ctat-LR-fusion	EML4--UBL5	chr2:42280973--chr19:9828592	1
DMS53	ctat-LR-fusion	EMG1--TAF1D	chr12:6971091--chr11:93733397	1
DMS53	ctat-LR-fusion	ELL--RPL18A	chr19:18521921--chr19:17862094	1
DMS53	ctat-LR-fusion	ELF1--MARCH6	chr13:41019228--chr5:10394082	1
DMS53	ctat-LR-fusion	ELAVL2--ADK	chr9:23731022--chr10:74708321	1
DMS53	ctat-LR-fusion	EIF5A--MRPL13	chr17:7309800--chr8:120419938	1
DMS53	ctat-LR-fusion	EIF5A--METRN	chr17:7309800--chr16:716933	1
DMS53	ctat-LR-fusion	EIF4G2--NDUFS1	chr11:10805907--chr2:206124276	1
DMS53	ctat-LR-fusion	EIF4B--TPT1	chr12:53020026--chr13:45337388	1
DMS53	ctat-LR-fusion	DOPEY2--TM7SF3	chr21:36164871--chr12:26974227	1
DMS53	ctat-LR-fusion	DPP3--SPCS2	chr11:66482470--chr11:74965034	1
DMS53	ctat-LR-fusion	DPY19L2P3--GLCCI1	chr7:29687399--chr7:8055436	1
DMS53	ctat-LR-fusion	DTWD2--C9orf3	chr5:118988294--chr9:95086682	1
DMS53	ctat-LR-fusion	DYM--COX5A	chr18:49391593--chr15:74920442	1
DMS53	ctat-LR-fusion	DYRK4--AUH	chr12:4605086--chr9:91220992	1
DMS53	ctat-LR-fusion	DOCK4--ZNF277	chr7:112206102--chr7:112286873	1
DMS53	ctat-LR-fusion	DZANK1--EIF2S2	chr20:18465250--chr20:34098633	1
DMS53	ctat-LR-fusion	E2F8--CDC42	chr11:19241497--chr1:22078429	1
DMS53	ctat-LR-fusion	EBPL--MRPL20	chr13:49669777--chr1:1405886	1
DMS53	ctat-LR-fusion	ECHDC2--EIF2B3	chr1:52921553--chr1:44897444	1
DMS53	ctat-LR-fusion	ECT2--PRKCI	chr3:172764500--chr3:170275229	1
DMS53	ctat-LR-fusion	ECT2--U2SURP	chr3:172807924--chr3:143012222	1
DMS53	ctat-LR-fusion	EIF2AK3--CCSER2	chr2:88613724--chr10:84463933	1
DMS53	ctat-LR-fusion	E2F6--TRAPPC2L	chr2:11451651--chr16:88859663	1
DMS53	ctat-LR-fusion	CD2AP--STAU2	chr6:47503440--chr8:73527804	1
DMS53	ctat-LR-fusion	CTDSPL2--NRCAM	chr15:44459200--chr7:108150147	1
DMS53	ctat-LR-fusion	CTD-2600O9.1--AES	chr16:57798632--chr19:3061257	1
DMS53	ctat-LR-fusion	CNPY2--NVL	chr12:56314851--chr1:224268133	1
DMS53	ctat-LR-fusion	CNOT8--LARP1	chr5:154863395--chr5:154799591	1
DMS53	ctat-LR-fusion	CNOT2--KPNA1	chr12:70243480--chr3:122467429	1
DMS53	ctat-LR-fusion	CNOT1--KAT6A	chr16:58629728--chr8:42049707	1
DMS53	ctat-LR-fusion	CNKSR1--UFL1	chr1:26177599--chr6:96523146	1
DMS53	ctat-LR-fusion	CMB9-22P13.1--SREBF2	chr11:65455581--chr22:41898649	1
DMS53	ctat-LR-fusion	CLINT1--KANSL1L	chr5:157858930--chr2:210075756	1
DMS53	ctat-LR-fusion	CLDN12--ACIN1	chr7:90405608--chr14:23062523	1
DMS53	ctat-LR-fusion	CLCN5--CHST7	chrX:49925314--chrX:46597760	1
DMS53	ctat-LR-fusion	CHN1--OLA1	chr2:175004894--chr2:174229451	1
DMS53	ctat-LR-fusion	CHD1L--PCCB	chr1:147242830--chr3:136297952	1
DMS53	ctat-LR-fusion	CGRRF1--PFDN5	chr14:54530226--chr12:53297850	1
DMS53	ctat-LR-fusion	CERS4--UBE2D2	chr19:8210862--chr5:139600372	1
DMS53	ctat-LR-fusion	CERS4--SNHG15	chr19:8210862--chr7:44984426	1
DMS53	ctat-LR-fusion	CERS4--SMYD2	chr19:8210862--chr1:214334200	1
DMS53	ctat-LR-fusion	CERS4--GALNT8	chr19:8210862--chr12:4726532	1
DMS53	ctat-LR-fusion	CERS4--APOO	chr19:8210862--chrX:23880952	1
DMS53	ctat-LR-fusion	CD99L2--R3HCC1L	chrX:150814862--chr10:98156093	1
DMS53	ctat-LR-fusion	CDC25B--PCBP1-AS1	chr20:3787139--chr2:70085624	1
DMS53	ctat-LR-fusion	CDC42SE2--METAP2	chr5:131359547--chr12:95511895	1
DMS53	ctat-LR-fusion	CDC42SE2--SMAD5	chr5:131316144--chr5:136147832	1
DMS53	ctat-LR-fusion	CDH2--C18orf42	chr18:28176963--chr18:5145755	1
DMS53	ctat-LR-fusion	CDH2--NDUFB4	chr18:28147673--chr3:120601111	1
DMS53	ctat-LR-fusion	CNPY2--TUBA1C	chr12:56314851--chr12:49272253	1
DMS53	ctat-LR-fusion	CDH7--PHF14	chr18:65751150--chr7:11111350	1
DMS53	ctat-LR-fusion	CECR7--RP11-390P2.4	chr22:17037344--chr6:138696597	1
DMS53	ctat-LR-fusion	CECR7--SNX5	chr22:17037344--chr20:17943195	1
DMS53	ctat-LR-fusion	CENPK--PGBD2	chr5:65561463--chr1:248917279	1
DMS53	ctat-LR-fusion	CENPP--PSPHP1	chr9:92379859--chr7:55773181	1
DMS53	ctat-LR-fusion	CENPW--TRMT11	chr6:126346318--chr6:125993757	1
DMS53	ctat-LR-fusion	CEPT1--CCNI	chr1:111139761--chr4:77066405	1
DMS53	ctat-LR-fusion	CDK2AP2--ZNF425	chr11:67508001--chr7:149118348	1
DMS53	ctat-LR-fusion	CTD-2600O9.1--EIF4A2	chr16:57798632--chr3:186787127	1
DMS53	ctat-LR-fusion	COA7--STOX1	chr1:52692727--chr10:68892589	1
DMS53	ctat-LR-fusion	COL4A2--PDLIM1	chr13:110357552--chr10:95271784	1
DMS53	ctat-LR-fusion	CTD-2561J22.5--DHRSX	chr19:21463744--chrX:2243230	1
DMS53	ctat-LR-fusion	CTD-2561J22.5--C14orf93	chr19:21454383--chr14:23001037	1
DMS53	ctat-LR-fusion	CTD-2374C24.1--RP11-6N13.1	chr5:104975674--chr5:104886975	1
DMS53	ctat-LR-fusion	CTD-2337A12.1--CAST	chr5:96379652--chr5:96675539	1
DMS53	ctat-LR-fusion	CTBP2--VPS26A	chr10:125110990--chr10:69132898	1
DMS53	ctat-LR-fusion	CSNK1E--TBC1D22A	chr22:38361399--chr22:46792520	1
DMS53	ctat-LR-fusion	CSNK1E--RASA4B	chr22:38361399--chr7:102485159	1
DMS53	ctat-LR-fusion	CSNK1E--ADAL	chr22:38380937--chr15:43336626	1
DMS53	ctat-LR-fusion	CSNK1D--WRN	chr17:82265686--chr8:31167022	1
DMS53	ctat-LR-fusion	CS--RPSAP58	chr12:56300160--chr19:23807826	1
DMS53	ctat-LR-fusion	CS--RP11-255H23.2	chr12:56300160--chr19:23807826	1
DMS53	ctat-LR-fusion	CREM--ESF1	chr10:35179276--chr20:13733842	1
DMS53	ctat-LR-fusion	CREBRF--NPM1	chr5:173056479--chr5:171390051	1
DMS53	ctat-LR-fusion	CREBL2--SIL1	chr12:12612187--chr5:138951884	1
DMS53	ctat-LR-fusion	CRACR2A--GMPS	chr12:3753015--chr3:155893518	1
DMS53	ctat-LR-fusion	CRACR2A--CCND2	chr12:3713237--chr12:4299860	1
DMS53	ctat-LR-fusion	CPSF6--RPL30	chr12:69262562--chr8:98041850	1
DMS53	ctat-LR-fusion	COLCA1--C18orf32	chr11:111304828--chr18:49490927	1
DMS53	ctat-LR-fusion	COLCA1--GINS2	chr11:111304828--chr16:85681681	1
DMS53	ctat-LR-fusion	COLCA1--HMGB1	chr11:111304828--chr13:30463694	1
DMS53	ctat-LR-fusion	COLCA1--POU2AF1	chr11:111304828--chr11:111354575	1
DMS53	ctat-LR-fusion	COLCA1--RPL17	chr11:111304828--chr18:49490927	1
DMS53	ctat-LR-fusion	COLCA1--TTC1	chr11:111304828--chr5:160043133	1
DMS53	ctat-LR-fusion	COBLL1--SLC38A11	chr2:164841156--chr2:164898730	1
DMS53	ctat-LR-fusion	COLGALT1--RPL18A	chr19:17560465--chr19:17861293	1
DMS53	ctat-LR-fusion	COPS3--PRKCSH	chr17:17264802--chr19:11450646	1
DMS53	ctat-LR-fusion	COQ10B--CCNH	chr2:197453664--chr5:87392904	1
DMS53	ctat-LR-fusion	CORO7--TAF1D	chr16:4387986--chr11:93732291	1
DMS53	ctat-LR-fusion	COX19--IQCE	chr7:919968--chr7:2578242	1
DMS53	ctat-LR-fusion	COX7B2--RPL36A	chr4:46844960--chrX:101391459	1
DMS53	ctat-LR-fusion	CPSF6--NR0B1	chr12:69262562--chrX:30304823	1
DMS53	ctat-LR-fusion	COPB2--DHX36	chr3:139389548--chr3:154284987	1
DMS53	ctat-LR-fusion	NMI--EEF1E1	chr2:151281948--chr6:8080030	1
DMS53	ctat-LR-fusion	MPHOSPH9--ALG8	chr12:123210056--chr11:78106946	1
DMS53	ctat-LR-fusion	NOC3L--HNRNPH3	chr10:94356535--chr10:68339140	1
DMS53	ctat-LR-fusion	TMCO4--ZBTB8OS	chr1:19770542--chr1:32634792	1
DMS53	ctat-LR-fusion	TJAP1--MYO1C	chr6:43503706--chr17:1480885	1
DMS53	ctat-LR-fusion	TICAM1--MRFAP1	chr19:4831614--chr4:6640828	1
DMS53	ctat-LR-fusion	TIAM1--NDUFS6	chr21:31558927--chr5:1814339	1
DMS53	ctat-LR-fusion	THRAP3--CDC42	chr1:36259484--chr1:22078429	1
DMS53	ctat-LR-fusion	THG1L--SRP19	chr5:157733044--chr5:112867404	1
DMS53	ctat-LR-fusion	THAP8--TBCB	chr19:36054135--chr19:36125451	1
DMS53	ctat-LR-fusion	THAP3--PSMB2	chr1:6625292--chr1:35609408	1
DMS53	ctat-LR-fusion	TGDS--GPR180	chr13:94593841--chr13:94619150	1
DMS53	ctat-LR-fusion	TFPI--COPB2	chr2:187484124--chr3:139373808	1
DMS53	ctat-LR-fusion	TFDP2--ATR	chr3:142093061--chr3:142499718	1
DMS53	ctat-LR-fusion	TET2--PPA2	chr4:105146979--chr4:105449403	1
DMS53	ctat-LR-fusion	TENM3--PPP2R5A	chr4:182144754--chr1:212329135	1
DMS53	ctat-LR-fusion	TENM3--CDKN2AIP	chr4:182680349--chr4:183446088	1
DMS53	ctat-LR-fusion	TECR--CHAF1A	chr19:14529711--chr19:4422566	1
DMS53	ctat-LR-fusion	TCF12--IFT140	chr15:57219590--chr16:1524695	1
DMS53	ctat-LR-fusion	TCEB2--RPL6	chr16:2776993--chr12:112405376	1
DMS53	ctat-LR-fusion	SYT11--NME7	chr1:155859795--chr1:169237687	1
DMS53	ctat-LR-fusion	SYT14--CEP350	chr1:210013797--chr1:180062220	1
DMS53	ctat-LR-fusion	SZRD1--KDM1A	chr1:16367308--chr1:23030469	1
DMS53	ctat-LR-fusion	TADA2A--ZNF207	chr17:37423615--chr17:32369295	1
DMS53	ctat-LR-fusion	TAF12--GPT2	chr1:28642992--chr16:46916628	1
DMS53	ctat-LR-fusion	TAF15--FAM192A	chr17:35809576--chr16:57173869	1
DMS53	ctat-LR-fusion	TMED4--RHBDF1	chr7:44581449--chr16:65039	1
DMS53	ctat-LR-fusion	TAX1BP1--IGF2BP3	chr7:27758133--chr7:23418824	1
DMS53	ctat-LR-fusion	TBC1D20--CHD4	chr20:441588--chr12:6592057	1
DMS53	ctat-LR-fusion	TBC1D8--MDH2	chr2:101010929--chr7:76054830	1
DMS53	ctat-LR-fusion	TBC1D8--SPX	chr2:101090254--chr12:21526886	1
DMS53	ctat-LR-fusion	TBK1--AIMP2	chr12:64490119--chr7:6015146	1
DMS53	ctat-LR-fusion	TBL1XR1--FAF1	chr3:177197121--chr1:50857997	1
DMS53	ctat-LR-fusion	TBP--PSMB1	chr6:170554463--chr6:170537340	1
DMS53	ctat-LR-fusion	TAX1BP1--NT5C3A	chr7:27740269--chr7:33026915	1
DMS53	ctat-LR-fusion	SYNJ2--GTF2H5	chr6:157982088--chr6:158191977	1
DMS53	ctat-LR-fusion	TMEM120B--GAS5	chr12:121752223--chr1:173864704	1
DMS53	ctat-LR-fusion	TMEM123--DDC	chr11:102448812--chr7:50504059	1
DMS53	ctat-LR-fusion	TSNARE1--PNRC1	chr8:142330901--chr6:89083753	1
DMS53	ctat-LR-fusion	TSEN15--NR0B1	chr1:184054863--chrX:30304823	1
DMS53	ctat-LR-fusion	TRPT1--MSTO2P	chr11:64224543--chr1:155748400	1
DMS53	ctat-LR-fusion	TRPM8--DHRSX	chr2:233954019--chrX:2243230	1
DMS53	ctat-LR-fusion	TRIT1--ARHGEF37	chr1:39847548--chr5:149618176	1
DMS53	ctat-LR-fusion	TRIQK--MFSD11	chr8:92954406--chr17:76738282	1
DMS53	ctat-LR-fusion	TRIP12--NOL7	chr2:229921880--chr6:13620208	1
DMS53	ctat-LR-fusion	TRIM52--RPS18	chr5:181260001--chr6:33272628	1
DMS53	ctat-LR-fusion	TRIM11--NR0B1	chr1:228396947--chrX:30304823	1
DMS53	ctat-LR-fusion	TRAF6--QSER1	chr11:36510048--chr11:32927157	1
DMS53	ctat-LR-fusion	TRAF2--TPRN	chr9:136899672--chr9:137192691	1
DMS53	ctat-LR-fusion	TPX2--CCT6A	chr20:31742647--chr7:56055624	1
DMS53	ctat-LR-fusion	TPTE2P5--SH3BGRL3	chr13:40921619--chr1:26280765	1
DMS53	ctat-LR-fusion	TPTE2P5--PAM	chr13:40921619--chr5:102865823	1
DMS53	ctat-LR-fusion	TPT1-AS1--RPL31	chr13:45341630--chr2:101004158	1
DMS53	ctat-LR-fusion	TPPP--ELAVL1	chr5:677750--chr19:7991831	1
DMS53	ctat-LR-fusion	TPD52--POLR2I	chr8:80042620--chr19:36114713	1
DMS53	ctat-LR-fusion	TMEM123--UBE2A	chr11:102448812--chrX:119583127	1
DMS53	ctat-LR-fusion	TMEM144--UBE2E3	chr4:158219390--chr2:180984043	1
DMS53	ctat-LR-fusion	TMEM177--SH3BP4	chr2:119679617--chr2:235053592	1
DMS53	ctat-LR-fusion	TMEM182--PEX7	chr2:102737013--chr6:136866627	1
DMS53	ctat-LR-fusion	TMEM242--FARSB	chr6:157318782--chr2:222633307	1
DMS53	ctat-LR-fusion	TMEM39A--NBPF11	chr3:119436791--chr1:148107114	1
DMS53	ctat-LR-fusion	TMEM120B--TM2D1	chr12:121712964--chr1:61701025	1
DMS53	ctat-LR-fusion	TMLHE--BRCC3	chrX:155612792--chrX:155116057	1
DMS53	ctat-LR-fusion	TMTC2--CAND1	chr12:82687669--chr12:67281910	1
DMS53	ctat-LR-fusion	TMTC2--TSPAN19	chr12:82687669--chr12:85014555	1
DMS53	ctat-LR-fusion	TNS3--LIMCH1	chr7:47344755--chr4:41619188	1
DMS53	ctat-LR-fusion	TOLLIP--KRTAP5-AS1	chr11:1309466--chr11:1597248	1
DMS53	ctat-LR-fusion	TOM1L1--RP11-88H9.2	chr17:54947312--chr1:111996427	1
DMS53	ctat-LR-fusion	TPCN1--PPP1CC	chr12:113226964--chr12:110724764	1
DMS53	ctat-LR-fusion	TMLHE--CLIC2	chrX:155545096--chrX:155299145	1
DMS53	ctat-LR-fusion	TSPAN15--STAMBP	chr10:69498396--chr2:73859254	1
DMS53	ctat-LR-fusion	SUGT1P3--SH3BGRL3	chr13:40921619--chr1:26280765	1
DMS53	ctat-LR-fusion	STXBP5L--NDUFB4	chr3:120909767--chr3:120601111	1
DMS53	ctat-LR-fusion	SNHG5--FOXP2	chr6:85677954--chr7:114426502	1
DMS53	ctat-LR-fusion	SNHG20--BIRC5	chr17:77089271--chr17:78216664	1
DMS53	ctat-LR-fusion	SNHG17--USP14	chr20:38426419--chr18:196637	1
DMS53	ctat-LR-fusion	SND1--AKR1B1	chr7:127991056--chr7:134451753	1
DMS53	ctat-LR-fusion	SNAPC1--TIA1	chr14:61762588--chr2:70224629	1
DMS53	ctat-LR-fusion	SNAP29--XKR8	chr22:20870533--chr1:27963497	1
DMS53	ctat-LR-fusion	SNAP25-AS1--SCG5	chr20:10196818--chr15:32696514	1
DMS53	ctat-LR-fusion	SMYD4--KANSL2	chr17:1827861--chr12:48655060	1
DMS53	ctat-LR-fusion	SMPD2--CDK11B	chr6:109442299--chr1:1657302	1
DMS53	ctat-LR-fusion	SMIM14--AP3S2	chr4:39638739--chr15:89837722	1
DMS53	ctat-LR-fusion	SMEK2--SNHG17	chr2:55617144--chr20:38431112	1
DMS53	ctat-LR-fusion	SMCHD1--SUN1	chr18:2656261--chr7:886056	1
DMS53	ctat-LR-fusion	SMCHD1--GET4	chr18:2656261--chr7:886056	1
DMS53	ctat-LR-fusion	SMC3--TIAL1	chr10:110569013--chr10:119588248	1
DMS53	ctat-LR-fusion	SMAGP--KRT8	chr12:51269245--chr12:52902072	1
DMS53	ctat-LR-fusion	SMAD5--SCN9A	chr5:136132962--chr2:166251885	1
DMS53	ctat-LR-fusion	SLX4IP--DSTN	chr20:10601819--chr20:17600738	1
DMS53	ctat-LR-fusion	SIRT2--NDUFA11	chr19:38899506--chr19:5896997	1
DMS53	ctat-LR-fusion	SKAP1--MRPL48	chr17:48162469--chr11:73844807	1
DMS53	ctat-LR-fusion	SLC11A2--LINC01346	chr12:51008476--chr1:3949027	1
DMS53	ctat-LR-fusion	SLC12A7--UBL5	chr5:1053349--chr19:9828592	1
DMS53	ctat-LR-fusion	SLC25A37--PARP1	chr8:23529212--chr1:226370517	1
DMS53	ctat-LR-fusion	SLC25A44--SNX19	chr1:156194247--chr11:130908083	1
DMS53	ctat-LR-fusion	SNHG8--CMPK1	chr4:118279137--chr1:47368469	1
DMS53	ctat-LR-fusion	SLC26A5--PMPCB	chr7:103420738--chr7:103303842	1
DMS53	ctat-LR-fusion	SLC35A2--UPP1	chrX:48911546--chr7:48106873	1
DMS53	ctat-LR-fusion	SLC36A4--CEP57	chr11:93165918--chr11:95799232	1
DMS53	ctat-LR-fusion	SLC36A4--DSP	chr11:93197778--chr6:7582642	1
DMS53	ctat-LR-fusion	SLC36A4--TCEB1	chr11:93180797--chr8:73959818	1
DMS53	ctat-LR-fusion	SLC38A10--BAIAP2	chr17:81280609--chr17:81110914	1
DMS53	ctat-LR-fusion	SLC50A1--AVIL	chr1:155136376--chr12:57801212	1
DMS53	ctat-LR-fusion	SLC29A2--ECI1	chr11:66367464--chr16:2240145	1
DMS53	ctat-LR-fusion	SUGT1P3--PAM	chr13:40921619--chr5:102865823	1
DMS53	ctat-LR-fusion	SNRNP70--STX12	chr19:49090520--chr1:27810246	1
DMS53	ctat-LR-fusion	SNX2--FAM192A	chr5:122775211--chr16:57164065	1
DMS53	ctat-LR-fusion	STX8--CMC1	chr17:9378552--chr3:28263291	1
DMS53	ctat-LR-fusion	STX7--SOGA3	chr6:132503446--chr6:127454101	1
DMS53	ctat-LR-fusion	STX7--KIAA0408	chr6:132503446--chr6:127454101	1
DMS53	ctat-LR-fusion	STX18-AS1--LINC01396	chr4:4649542--chr4:4850707	1
DMS53	ctat-LR-fusion	STRA13--EPRS	chr17:82019293--chr1:219973398	1
DMS53	ctat-LR-fusion	STON2--VRK1	chr14:81427102--chr14:96833467	1
DMS53	ctat-LR-fusion	STON2--C5orf30	chr14:81395894--chr5:103265908	1
DMS53	ctat-LR-fusion	STK4--PGBD2	chr20:44972158--chr1:248917279	1
DMS53	ctat-LR-fusion	STK33--TXNL1	chr11:8594083--chr18:56626457	1
DMS53	ctat-LR-fusion	STK3--EBAG9	chr8:98706467--chr8:109550810	1
DMS53	ctat-LR-fusion	STK25--TMEM8A	chr2:241508443--chr16:377848	1
DMS53	ctat-LR-fusion	STAU1--NCAPG	chr20:49174195--chr4:17842310	1
DMS53	ctat-LR-fusion	STAG3L1--FAM193A	chr7:75365643--chr4:2731775	1
DMS53	ctat-LR-fusion	STAG2--AC079807.4	chrX:124031125--chr2:48164934	1
DMS53	ctat-LR-fusion	ST7L--RNF128	chr1:112610841--chrX:106772913	1
DMS53	ctat-LR-fusion	ST6GALNAC3--GALNT13	chr1:76074884--chr2:153900936	1
DMS53	ctat-LR-fusion	SSH2--SNX5	chr17:29929938--chr20:17957037	1
DMS53	ctat-LR-fusion	SOGA3--HMGN3	chr6:127512891--chr6:79215022	1
DMS53	ctat-LR-fusion	SORBS3--RPS18	chr8:22550058--chr6:33272628	1
DMS53	ctat-LR-fusion	SPATA2L--UCHL1	chr16:89701491--chr4:41256950	1
DMS53	ctat-LR-fusion	SPC25--MTX2	chr2:168873585--chr2:176296860	1
DMS53	ctat-LR-fusion	SPIN3--ZNF322	chrX:56994723--chr6:26643728	1
DMS53	ctat-LR-fusion	NMRK1--NOP58	chr9:75077159--chr2:202297379	1
DMS53	ctat-LR-fusion	SNX13--HDAC9	chr7:17940284--chr7:18793345	1
DMS53	ctat-LR-fusion	SPRYD7--HEATR5B	chr13:49921478--chr2:36981794	1
DMS53	ctat-LR-fusion	SPTLC1--PSMB1	chr9:92108740--chr6:170549113	1
DMS53	ctat-LR-fusion	SQSTM1--NAE1	chr5:179811682--chr16:66805826	1
DMS53	ctat-LR-fusion	SRP9--VIMP	chr1:225783368--chr15:101274681	1
DMS53	ctat-LR-fusion	SRPK2--MIR4435-1HG	chr7:105388648--chr2:111429620	1
DMS53	ctat-LR-fusion	SRSF10--TBC1D15	chr1:23980191--chr12:71880469	1
DMS53	ctat-LR-fusion	SSBP1--CCT2	chr7:141739190--chr12:69589485	1
DMS53	ctat-LR-fusion	SPTBN1--ANKRD12	chr2:54599243--chr18:9263790	1
DMS53	ctat-LR-fusion	SIK2--YWHAH	chr11:111602698--chr22:31956139	1
DMS53	ctat-LR-fusion	TSTD2--ZNF3	chr9:97633243--chr7:100064912	1
DMS53	ctat-LR-fusion	TTC17--FBXW2	chr11:43444209--chr9:120772840	1
DMS53	ctat-LR-fusion	ZNF326--C1orf61	chr1:90005244--chr1:156404601	1
DMS53	ctat-LR-fusion	ZNF322--RAB11FIP4	chr6:26658558--chr17:31517651	1
DMS53	ctat-LR-fusion	ZNF251--YWHAE	chr8:144753683--chr17:1365058	1
DMS53	ctat-LR-fusion	ZNF236--GTSE1	chr18:76822662--chr22:46323190	1
DMS53	ctat-LR-fusion	ZNF19--FUK	chr16:71546277--chr16:70468849	1
DMS53	ctat-LR-fusion	ZNF142--FCGRT	chr2:218658701--chr19:49524507	1
DMS53	ctat-LR-fusion	ZNF141--RPS6KC1	chr4:344430--chr1:213242569	1
DMS53	ctat-LR-fusion	ZNF124--EYA3	chr1:247171848--chr1:28000049	1
DMS53	ctat-LR-fusion	ZNF107--NR0B1	chr7:64691960--chrX:30304823	1
DMS53	ctat-LR-fusion	ZNF107--CTDSPL2	chr7:64679336--chr15:44484224	1
DMS53	ctat-LR-fusion	ZMYND8--RAB21	chr20:47276314--chr12:71769800	1
DMS53	ctat-LR-fusion	ZMYND11--EPC1	chr10:180128--chr10:32305931	1
DMS53	ctat-LR-fusion	ZMYM2--RTFDC1	chr13:20067390--chr20:56516935	1
DMS53	ctat-LR-fusion	ZMYM2--CALCA	chr13:19960026--chr11:14967854	1
DMS53	ctat-LR-fusion	ZMYM1--GAS5	chr1:35110447--chr1:173864506	1
DMS53	ctat-LR-fusion	ZMAT4--TBCA	chr8:40825575--chr5:77708347	1
DMS53	ctat-LR-fusion	ZFR--DROSHA	chr5:32444229--chr5:31437298	1
DMS53	ctat-LR-fusion	ZADH2--TSHZ1	chr18:75208850--chr18:75285448	1
DMS53	ctat-LR-fusion	ZBTB43--PSMB7	chr9:126805132--chr9:124384656	1
DMS53	ctat-LR-fusion	ZC3H11A--DHX9	chr1:203817124--chr1:182858104	1
DMS53	ctat-LR-fusion	ZC3H18--GNB1	chr16:88570566--chr1:1839238	1
DMS53	ctat-LR-fusion	ZC3H8--BTF3	chr2:112250191--chr5:73502488	1
DMS53	ctat-LR-fusion	ZC3H8--CDK7	chr2:112250191--chr5:69276543	1
DMS53	ctat-LR-fusion	ZNF326--CALCA	chr1:90005244--chr11:14967854	1
DMS53	ctat-LR-fusion	ZC3H8--FAM120B	chr2:112254908--chr6:170388287	1
DMS53	ctat-LR-fusion	ZCCHC11--PSMB1	chr1:52552931--chr6:170549113	1
DMS53	ctat-LR-fusion	ZDHHC16--PSMB1	chr10:97446353--chr6:170549113	1
DMS53	ctat-LR-fusion	ZDHHC17--NAP1L1	chr12:76764329--chr12:76060279	1
DMS53	ctat-LR-fusion	ZDHHC17--OSBPL8	chr12:76764329--chr12:76450979	1
DMS53	ctat-LR-fusion	ZFAND6--MTHFS	chr15:80059809--chr15:79889354	1
DMS53	ctat-LR-fusion	ZFHX4--C5orf30	chr8:76681620--chr5:103265908	1
DMS53	ctat-LR-fusion	ZC3H8--TBCB	chr2:112250191--chr19:36120710	1
DMS53	ctat-LR-fusion	YWHAG--HMP19	chr7:76358722--chr5:174064232	1
DMS53	ctat-LR-fusion	ZNF331--KANK2	chr19:53538296--chr19:11178720	1
DMS53	ctat-LR-fusion	ZNF410--C14orf142	chr14:73886915--chr14:93203782	1
DMS53	ctat-LR-fusion	ZZZ3--KIF2A	chr1:77683262--chr5:62373687	1
DMS53	ctat-LR-fusion	ZZZ3--HENMT1	chr1:77683262--chr1:108657579	1
DMS53	ctat-LR-fusion	ZZZ3--ANKRD13C	chr1:77683262--chr1:70315566	1
DMS53	ctat-LR-fusion	ZW10--KPNA5	chr11:113768833--chr6:116705072	1
DMS53	ctat-LR-fusion	ZPR1--MED19	chr11:116787820--chr11:57704396	1
DMS53	ctat-LR-fusion	ZNF738--NCAPG2	chr19:21375964--chr7:158631717	1
DMS53	ctat-LR-fusion	ZNF738--MKI67	chr19:21375964--chr10:128119319	1
DMS53	ctat-LR-fusion	ZNF736--RAD54B	chr7:64336982--chr8:94411315	1
DMS53	ctat-LR-fusion	ZNF736--FSBP	chr7:64336982--chr8:94411315	1
DMS53	ctat-LR-fusion	ZNF736--CTD-2666L21.1	chr7:64336982--chr19:12237090	1
DMS53	ctat-LR-fusion	ZNF736--CREBZF	chr7:64336982--chr11:85663601	1
DMS53	ctat-LR-fusion	ZNF721--PSPHP1	chr4:472575--chr7:55773181	1
DMS53	ctat-LR-fusion	ZNF721--FAM120B	chr4:472575--chr6:170395487	1
DMS53	ctat-LR-fusion	ZNF718--SET	chr4:124673--chr9:128691170	1
DMS53	ctat-LR-fusion	ZNF696--TRAPPC9	chr8:143293065--chr8:139732202	1
DMS53	ctat-LR-fusion	ZNF696--HMGB1	chr8:143293065--chr13:30463694	1
DMS53	ctat-LR-fusion	ZNF678--CFLAR	chr1:227563724--chr2:201129729	1
DMS53	ctat-LR-fusion	ZNF432--STX8	chr19:52046854--chr17:9491921	1
DMS53	ctat-LR-fusion	ZNF460--RP11-286N22.10	chr19:57280124--chr11:61499763	1
DMS53	ctat-LR-fusion	ZNF470--EBLN3	chr19:56568883--chr9:37086668	1
DMS53	ctat-LR-fusion	ZNF511--PLEKHA1	chr10:133311841--chr10:122392303	1
DMS53	ctat-LR-fusion	ZNF511--RAB11FIP2	chr10:133311841--chr10:118015110	1
DMS53	ctat-LR-fusion	ZNF512--SMYD3	chr2:27583142--chr1:245863886	1
DMS53	ctat-LR-fusion	ZNF346--UIMC1	chr5:177022913--chr5:176905492	1
DMS53	ctat-LR-fusion	ZNF578--UBR5	chr19:52456958--chr8:102269108	1
DMS53	ctat-LR-fusion	ZNF608--CTAGE5	chr5:124641252--chr14:39326864	1
DMS53	ctat-LR-fusion	ZNF627--TMEM91	chr19:11564492--chr19:41378281	1
DMS53	ctat-LR-fusion	ZNF644--SFPQ	chr1:91021990--chr1:35178036	1
DMS53	ctat-LR-fusion	ZNF655--FYTTD1	chr7:99560695--chr3:197756426	1
DMS53	ctat-LR-fusion	ZNF672--NSUN2	chr1:248838551--chr5:6604685	1
DMS53	ctat-LR-fusion	ZNF675--TMEM14C	chr19:23687031--chr6:10728640	1
DMS53	ctat-LR-fusion	ZNF605--TAF1D	chr12:132933035--chr11:93732291	1
DMS53	ctat-LR-fusion	TTC1--RNF145	chr5:160010858--chr5:159182051	1
DMS53	ctat-LR-fusion	YWHAG--ANP32B	chr7:76358722--chr9:97994631	1
DMS53	ctat-LR-fusion	YWHAE--EHMT1	chr17:1400047--chr9:137716626	1
DMS53	ctat-LR-fusion	USP6NL--PTPN1	chr10:11611443--chr20:50561363	1
DMS53	ctat-LR-fusion	USP48--KIF4A	chr1:21752527--chrX:70341799	1
DMS53	ctat-LR-fusion	USP47--NDUFS4	chr11:11842224--chr5:53646233	1
DMS53	ctat-LR-fusion	USP43--CNTLN	chr17:9666751--chr9:17226203	1
DMS53	ctat-LR-fusion	USP30--CYB5R4	chr12:109085073--chr6:83919397	1
DMS53	ctat-LR-fusion	USP15--TAF1D	chr12:62260503--chr11:93732291	1
DMS53	ctat-LR-fusion	USP10--SDCCAG8	chr16:84700111--chr1:243330540	1
DMS53	ctat-LR-fusion	UNQ6494--TXNL1	chr9:89665382--chr18:56618126	1
DMS53	ctat-LR-fusion	UNQ6494--RAP1B	chr9:89665382--chr12:68654112	1
DMS53	ctat-LR-fusion	UNQ6494--C17orf89	chr9:89665382--chr17:81240987	1
DMS53	ctat-LR-fusion	UNKL--UBE2I	chr16:1371519--chr16:1314020	1
DMS53	ctat-LR-fusion	UNC50--PHF14	chr2:98610895--chr7:11111350	1
DMS53	ctat-LR-fusion	UNC13B--ABHD17B	chr9:35162305--chr9:71875083	1
DMS53	ctat-LR-fusion	UNC13A--FUT8	chr19:17688178--chr14:65455621	1
DMS53	ctat-LR-fusion	UCHL5--GLMN	chr1:193049746--chr1:92247989	1
DMS53	ctat-LR-fusion	UBXN7--C7orf50	chr3:196432327--chr7:1010143	1
DMS53	ctat-LR-fusion	UBQLN1--GKAP1	chr9:83669185--chr9:83768970	1
DMS53	ctat-LR-fusion	TTC3--DSCR3	chr21:37073364--chr21:37240639	1
DMS53	ctat-LR-fusion	TTC3--HLCS	chr21:37073364--chr21:36767285	1
DMS53	ctat-LR-fusion	TTC8--CALML4	chr14:88824821--chr15:68197628	1
DMS53	ctat-LR-fusion	TUBA1B--EIF5A	chr12:49131298--chr17:7309615	1
DMS53	ctat-LR-fusion	TXNL4A--CSRP1	chr18:80033851--chr1:201496304	1
DMS53	ctat-LR-fusion	TXNRD1--CHST11	chr12:104339273--chr12:104601906	1
DMS53	ctat-LR-fusion	USP8--G3BP2	chr15:50462322--chr4:75662049	1
DMS53	ctat-LR-fusion	U47924.27--ATP13A2	chr12:6963348--chr1:16987269	1
DMS53	ctat-LR-fusion	U47924.27--SLC25A3	chr12:6963348--chr12:98595727	1
DMS53	ctat-LR-fusion	UBA52--COX20	chr19:18573403--chr1:244842195	1
DMS53	ctat-LR-fusion	UBAP1--EIF4EBP1	chr9:34179240--chr8:38057081	1
DMS53	ctat-LR-fusion	UBAP2L--RPL34	chr1:154228725--chr4:108630021	1
DMS53	ctat-LR-fusion	UBE2C--ATP1A1	chr20:45812796--chr1:116401130	1
DMS53	ctat-LR-fusion	UBE2G2--ULK3	chr21:44777299--chr15:74837798	1
DMS53	ctat-LR-fusion	U47924.27--NEK3	chr12:6963348--chr13:52156248	1
DMS53	ctat-LR-fusion	YWHAE--SREK1	chr17:1400047--chr5:66163792	1
DMS53	ctat-LR-fusion	VAMP4--SPOCK3	chr1:171738349--chr4:166889244	1
DMS53	ctat-LR-fusion	VAX2--ZNF638	chr2:70900868--chr2:71396141	1
DMS53	ctat-LR-fusion	YIPF1--TMEM59	chr1:53871372--chr1:54043525	1
DMS53	ctat-LR-fusion	YAF2--ALG10B	chr12:42237599--chr12:38318261	1
DMS53	ctat-LR-fusion	XPR1--LHX4-AS1	chr1:180632270--chr1:180430262	1
DMS53	ctat-LR-fusion	XPO4--MPP6	chr13:20902670--chr7:24641716	1
DMS53	ctat-LR-fusion	XIAP--AC007246.3	chrX:123860293--chr2:39453839	1
DMS53	ctat-LR-fusion	WNT9A--TGIF1	chr1:227947793--chr18:3456354	1
DMS53	ctat-LR-fusion	WNT9A--SNAP47	chr1:227947793--chr1:227766959	1
DMS53	ctat-LR-fusion	WNT9A--DAZAP1	chr1:227947793--chr19:1417500	1
DMS53	ctat-LR-fusion	WNT9A--CTBP1	chr1:227947793--chr4:1241519	1
DMS53	ctat-LR-fusion	WNT9A--ARF1	chr1:227947793--chr1:228097078	1
DMS53	ctat-LR-fusion	WNK3--NUF2	chrX:54255740--chr1:163340364	1
DMS53	ctat-LR-fusion	WDR7--RP11-186B7.4	chr18:56651576--chr17:7575119	1
DMS53	ctat-LR-fusion	WDR7--EIF4A1	chr18:56651576--chr17:7575119	1
DMS53	ctat-LR-fusion	WDR37--AKR1E2	chr10:1086357--chr10:4830675	1
DMS53	ctat-LR-fusion	WDR27--TIAL1	chr6:169666417--chr10:119580538	1
DMS53	ctat-LR-fusion	WDR27--PSPC1	chr6:169660663--chr13:19709599	1
DMS53	ctat-LR-fusion	WDR27--CRLS1	chr6:169664166--chr20:6031285	1
DMS53	ctat-LR-fusion	VEZF1--CTNNBL1	chr17:57988079--chr20:37779187	1
DMS53	ctat-LR-fusion	VGLL4--TAMM41	chr3:11702971--chr3:11839314	1
DMS53	ctat-LR-fusion	VPRBP--RAVER2	chr3:51499873--chr1:64802976	1
DMS53	ctat-LR-fusion	VPS13C--APLF	chr15:62044212--chr2:68537872	1
DMS53	ctat-LR-fusion	VPS35--KLRC3	chr16:46683508--chr12:10412616	1
DMS53	ctat-LR-fusion	VPS45--UBR4	chr1:150110627--chr1:19078066	1
DMS53	ctat-LR-fusion	VAPA--NDUFV2	chr18:9914335--chr18:9126831	1
DMS53	ctat-LR-fusion	VWDE--PHF14	chr7:12403659--chr7:11111350	1
DMS53	ctat-LR-fusion	WASH3P--MTO1	chr15:101966223--chr6:73500574	1
DMS53	ctat-LR-fusion	WASH7P--PTMS	chr12:26801--chr12:6769603	1
DMS53	ctat-LR-fusion	WASH7P--ZADH2	chr12:26801--chr18:75202340	1
DMS53	ctat-LR-fusion	WDFY2--PSMD14	chr13:51584824--chr2:161370107	1
DMS53	ctat-LR-fusion	WDHD1--CEP128	chr14:55027028--chr14:80743267	1
DMS53	ctat-LR-fusion	WDR20--PPP2R5C	chr14:102140172--chr14:101856686	1
DMS53	ctat-LR-fusion	WASF3--DNAJC11	chr13:26557819--chr1:6681037	1
DMS53	ctat-LR-fusion	SH3GL1--ANP32A	chr19:4400324--chr15:68787919	1
DMS53	ctat-LR-fusion	SPOCK2--SRBD1	chr10:72088140--chr2:45389599	1
DMS53	ctat-LR-fusion	SGSH--GALNT3	chr17:80220226--chr2:165770808	1
DMS53	ctat-LR-fusion	PRR13--NARF	chr12:53442733--chr17:82485497	1
DMS53	ctat-LR-fusion	PRPF40A--ATP6V1B2	chr2:152679352--chr8:20218153	1
DMS53	ctat-LR-fusion	PRPF39--ABCC4	chr14:45084249--chr13:95116001	1
DMS53	ctat-LR-fusion	PROSC--THUMPD3-AS1	chr8:37766355--chr3:9390497	1
DMS53	ctat-LR-fusion	PRKAR1B--POLI	chr7:677229--chr18:54271360	1
DMS53	ctat-LR-fusion	PRKAR1A--RPL37A	chr17:68515576--chr2:216499270	1
DMS53	ctat-LR-fusion	SGSM1--GNB1	chr22:24806484--chr1:1839238	1
DMS53	ctat-LR-fusion	PRDM5--KLK11	chr4:120907474--chr19:51023228	1
DMS53	ctat-LR-fusion	PRDM5--GDI2	chr4:120907474--chr10:5768384	1
DMS53	ctat-LR-fusion	PRAP1--RAB11FIP2	chr10:133311841--chr10:118015110	1
DMS53	ctat-LR-fusion	PRAP1--PLEKHA1	chr10:133311841--chr10:122392303	1
DMS53	ctat-LR-fusion	PPP6R2--MKRN1	chr22:50372150--chr7:140459936	1
DMS53	ctat-LR-fusion	PPP6R2--BAZ1A	chr22:50372150--chr14:34811036	1
DMS53	ctat-LR-fusion	PPP2R5E--ESRP1	chr14:63539529--chr8:94678203	1
DMS53	ctat-LR-fusion	PPP2R5B--NEAT1	chr11:64932892--chr11:65423295	1
DMS53	ctat-LR-fusion	PPP2R2A--TUSC3	chr8:26293740--chr8:15623080	1
DMS53	ctat-LR-fusion	PPP2CA--PFDN1	chr5:134225760--chr5:140246057	1
DMS53	ctat-LR-fusion	POLQ--ADCK3	chr3:121544727--chr1:226961377	1
DMS53	ctat-LR-fusion	POLR2I--STARD7	chr19:36114015--chr2:96186914	1
DMS53	ctat-LR-fusion	POLR2J3--ACN9	chr7:102566997--chr7:97181012	1
DMS53	ctat-LR-fusion	POLR2J3--MRPS28	chr7:102566997--chr8:80003180	1
DMS53	ctat-LR-fusion	POLR2J3--XPO4	chr7:102566997--chr13:20790580	1
DMS53	ctat-LR-fusion	POLR3K--RPS27A	chr16:53476--chr2:55232808	1
DMS53	ctat-LR-fusion	PRR3--RPL21	chr6:30557450--chr13:27256184	1
DMS53	ctat-LR-fusion	PPAPDC1B--DDX11	chr8:38266141--chr12:31097885	1
DMS53	ctat-LR-fusion	PPFIA2--GRIPAP1	chr12:81597952--chrX:48981872	1
DMS53	ctat-LR-fusion	PPFIA2--NFU1	chr12:81597952--chr2:69432005	1
DMS53	ctat-LR-fusion	PPHLN1--ERO1LB	chr12:42355222--chr1:236235835	1
DMS53	ctat-LR-fusion	PPHLN1--PLGRKT	chr12:42355222--chr9:5358360	1
DMS53	ctat-LR-fusion	PPM1A--SMYD3	chr14:60249677--chr1:245929937	1
DMS53	ctat-LR-fusion	PPP1R1C--NCKAP1	chr2:182063791--chr2:182994887	1
DMS53	ctat-LR-fusion	PPFIA2--ACSS1	chr12:81405787--chr20:25012664	1
DMS53	ctat-LR-fusion	POLN--TAX1BP1	chr4:2241520--chr7:27827738	1
DMS53	ctat-LR-fusion	PRR4--MGAT4C	chr12:11047020--chr12:86049723	1
DMS53	ctat-LR-fusion	PRSS23--C11orf73	chr11:86800651--chr11:86306245	1
DMS53	ctat-LR-fusion	RAB3IP--TMEM263	chr12:69739869--chr12:106967111	1
DMS53	ctat-LR-fusion	RAB3IP--EPB41L4A	chr12:69756663--chr5:112307490	1
DMS53	ctat-LR-fusion	RAB37--STIM2	chr17:74744373--chr4:26858199	1
DMS53	ctat-LR-fusion	RAB35--DOCK1	chr12:120099030--chr10:126970702	1
DMS53	ctat-LR-fusion	RAB30--MSANTD2	chr11:83071691--chr11:124774974	1
DMS53	ctat-LR-fusion	RAB30--MAPK14	chr11:82994039--chr6:36102571	1
DMS53	ctat-LR-fusion	R3HCC1L--RPL30	chr10:98163397--chr8:98045399	1
DMS53	ctat-LR-fusion	R3HCC1L--RP11-452K12.7	chr10:98163397--chr10:97419236	1
DMS53	ctat-LR-fusion	R3HCC1L--PHYKPL	chr10:98163397--chr5:178214885	1
DMS53	ctat-LR-fusion	QPCTL--LBHD1	chr19:45693556--chr11:62663333	1
DMS53	ctat-LR-fusion	QPCTL--C11orf98	chr19:45693556--chr11:62663333	1
DMS53	ctat-LR-fusion	QPCT--UBAP2L	chr2:37344851--chr1:154259948	1
DMS53	ctat-LR-fusion	PVT1--LAPTM4B	chr8:127796071--chr8:97805353	1
DMS53	ctat-LR-fusion	PUM1--FUK	chr1:30995054--chr16:70479579	1
DMS53	ctat-LR-fusion	PTPRN2--ZADH2	chr7:157898673--chr18:75202340	1
DMS53	ctat-LR-fusion	PTPRN2--UBB	chr7:158489735--chr17:16381902	1
DMS53	ctat-LR-fusion	PTPRK--ECHDC1	chr6:128322039--chr6:127290277	1
DMS53	ctat-LR-fusion	PRTG--ZNF570	chr15:55740382--chr19:37483879	1
DMS53	ctat-LR-fusion	PSIP1--C11orf73	chr9:15506561--chr11:86337379	1
DMS53	ctat-LR-fusion	PSMB2--SFPQ	chr1:35631274--chr1:35177399	1
DMS53	ctat-LR-fusion	PSMC3IP--UBA52	chr17:42577213--chr19:18573293	1
DMS53	ctat-LR-fusion	PSMD1--MRPL3	chr2:231057041--chr3:131471279	1
DMS53	ctat-LR-fusion	PSMD12--PITPNC1	chr17:67366412--chr17:67532802	1
DMS53	ctat-LR-fusion	PRR4--TTC6	chr12:10973655--chr14:37802094	1
DMS53	ctat-LR-fusion	PSMD7--RFWD3	chr16:74296988--chr16:74632673	1
DMS53	ctat-LR-fusion	PTH2R--GLS	chr2:208444887--chr2:190927306	1
DMS53	ctat-LR-fusion	PTK2--MAGED2	chr8:141001125--chrX:54814661	1
DMS53	ctat-LR-fusion	PTPDC1--BCL2L1	chr9:94064821--chr20:31666086	1
DMS53	ctat-LR-fusion	PTPN11--HDDC3	chr12:112419125--chr15:90932110	1
DMS53	ctat-LR-fusion	PTPN2--SEH1L	chr18:12884073--chr18:12963160	1
DMS53	ctat-LR-fusion	PTPN2--STARD7	chr18:12859164--chr2:96195549	1
DMS53	ctat-LR-fusion	PSPH--UBE2D2	chr7:56051138--chr5:139600372	1
DMS53	ctat-LR-fusion	RAB7A--RP11-320G10.1	chr3:128726359--chr3:18041449	1
DMS53	ctat-LR-fusion	POC1A--TMEM59	chr3:52122379--chr1:54047372	1
DMS53	ctat-LR-fusion	PNPLA7--WLS	chr9:137484587--chr1:68137933	1
DMS53	ctat-LR-fusion	PAQR6--BRI3	chr1:156245782--chr7:98282351	1
DMS53	ctat-LR-fusion	PAPSS1--MAPK10	chr4:107682015--chr4:86159467	1
DMS53	ctat-LR-fusion	PAPOLG--CANX	chr2:60756495--chr5:179716105	1
DMS53	ctat-LR-fusion	PAM--KBTBD2	chr5:102867393--chr7:32879942	1
DMS53	ctat-LR-fusion	PAK1--KTN1	chr11:77473552--chr14:55612019	1
DMS53	ctat-LR-fusion	PAAF1--TCF24	chr11:73891201--chr8:66948164	1
DMS53	ctat-LR-fusion	P4HA3--DNAJC12	chr11:74304270--chr10:67805787	1
DMS53	ctat-LR-fusion	OVOL2--RRBP1	chr20:18058890--chr20:17660528	1
DMS53	ctat-LR-fusion	OSBPL9--HOOK1	chr1:51714079--chr1:59821858	1
DMS53	ctat-LR-fusion	OSBPL9--BTF3L4	chr1:51617221--chr1:52064825	1
DMS53	ctat-LR-fusion	OMA1--HOOK1	chr1:58506060--chr1:59821858	1
DMS53	ctat-LR-fusion	ODF2L--ANKRD12	chr1:86396033--chr18:9195551	1
DMS53	ctat-LR-fusion	NXPH1--ICA1	chr7:8435767--chr7:8128142	1
DMS53	ctat-LR-fusion	NXPE3--RHEB	chr3:101801989--chr7:151470652	1
DMS53	ctat-LR-fusion	NUTM2A-AS1--OR7E47P	chr10:87246115--chr12:52107379	1
DMS53	ctat-LR-fusion	NUTF2--NOC3L	chr16:67847456--chr10:94352403	1
DMS53	ctat-LR-fusion	NUMB--RBM25	chr14:73323130--chr14:73096915	1
DMS53	ctat-LR-fusion	NOC4L--ZNF268	chr12:132144605--chr12:133202144	1
DMS53	ctat-LR-fusion	NPM1--NARS	chr5:171400925--chr18:57601783	1
DMS53	ctat-LR-fusion	NRCAM--FAM114A2	chr7:108189645--chr5:154034946	1
DMS53	ctat-LR-fusion	NSUN5P1--ATP5C1	chr7:75410726--chr10:7797047	1
DMS53	ctat-LR-fusion	NSUN5P2--SARNP	chr7:72954625--chr12:55760640	1
DMS53	ctat-LR-fusion	NSUN5P2--UBA52	chr7:72954359--chr19:18573293	1
DMS53	ctat-LR-fusion	PARP11--TPD52	chr12:3873212--chr8:80064593	1
DMS53	ctat-LR-fusion	NSUN6--NEBL	chr10:18642476--chr10:20787308	1
DMS53	ctat-LR-fusion	NTPCR--TTC13	chr1:232956443--chr1:230933861	1
DMS53	ctat-LR-fusion	NUDC--HMGN2	chr1:26924166--chr1:26473483	1
DMS53	ctat-LR-fusion	NUDCD3--CDK13	chr7:44484968--chr7:39997494	1
DMS53	ctat-LR-fusion	NUDT14--RABAC1	chr14:105181129--chr19:41958948	1
DMS53	ctat-LR-fusion	NUDT5--TXNL4A	chr10:12195770--chr18:79977701	1
DMS53	ctat-LR-fusion	NUDT6--FAM193B	chr4:122922801--chr5:177522071	1
DMS53	ctat-LR-fusion	NTMT1--TMEM50B	chr9:129626321--chr21:33468926	1
DMS53	ctat-LR-fusion	PNPLA8--NRCAM	chr7:108526029--chr7:108312731	1
DMS53	ctat-LR-fusion	PCBD2--PFDN1	chr5:134910466--chr5:140246057	1
DMS53	ctat-LR-fusion	PCNP--DYX1C1	chr3:101574279--chr15:55439581	1
DMS53	ctat-LR-fusion	PNKP--RPL18A	chr19:49866399--chr19:17862918	1
DMS53	ctat-LR-fusion	PNKP--MBD1	chr19:49866399--chr18:50272955	1
DMS53	ctat-LR-fusion	PLS1--SNHG11	chr3:142596509--chr20:38448662	1
DMS53	ctat-LR-fusion	PLS1--PDCD10	chr3:142596509--chr3:167720273	1
DMS53	ctat-LR-fusion	PLEKHM1--PPHLN1	chr17:45482437--chr12:42441315	1
DMS53	ctat-LR-fusion	PLEKHA1--UBE2E3	chr10:122374806--chr2:181057693	1
DMS53	ctat-LR-fusion	PLCB1--STX8	chr20:8658704--chr17:9491921	1
DMS53	ctat-LR-fusion	PKN2--RP11-618I10.2	chr1:88684628--chr4:69355321	1
DMS53	ctat-LR-fusion	PITPNA-AS1--FAM192A	chr17:1517093--chr16:57173869	1
DMS53	ctat-LR-fusion	PIK3C2A--NECAP1	chr11:17207848--chr12:8092676	1
DMS53	ctat-LR-fusion	PIK3C2A--NAP1L1	chr11:17155526--chr12:76053110	1
DMS53	ctat-LR-fusion	PIAS2--LSMEM1	chr18:46917322--chr7:112486923	1
DMS53	ctat-LR-fusion	PHKB--C16orf87	chr16:47515601--chr16:46824482	1
DMS53	ctat-LR-fusion	PHIP--MCM8	chr6:79042843--chr20:5977876	1
DMS53	ctat-LR-fusion	PHF20--TIAL1	chr20:35801605--chr10:119588248	1
DMS53	ctat-LR-fusion	PGM5--OLA1	chr9:68479553--chr2:174142000	1
DMS53	ctat-LR-fusion	PFN2--ZNF227	chr3:149968358--chr19:44228446	1
DMS53	ctat-LR-fusion	PCNT--DAZAP1	chr21:46324282--chr19:1417500	1
DMS53	ctat-LR-fusion	PCNT--KIAA1033	chr21:46326589--chr12:105156726	1
DMS53	ctat-LR-fusion	PCSK1--SDCCAG3	chr5:96412318--chr9:136405978	1
DMS53	ctat-LR-fusion	PDCD6--IDH2	chr5:272772--chr15:90088747	1
DMS53	ctat-LR-fusion	PDE3A--RP11-405A12.2	chr12:20370244--chr12:19923198	1
DMS53	ctat-LR-fusion	PDIA3--PBX3	chr15:43746706--chr9:125929655	1
DMS53	ctat-LR-fusion	PCGF2--BAIAP2	chr17:38748196--chr17:81099928	1
DMS53	ctat-LR-fusion	PDIA3--XRCC5	chr15:43761531--chr2:216190225	1
DMS53	ctat-LR-fusion	PDLIM5--ANXA5	chr4:94455384--chr4:121672626	1
DMS53	ctat-LR-fusion	PDXDC1--CTBP1	chr16:14975220--chr4:1241519	1
DMS53	ctat-LR-fusion	PELI1--HNRNPLL	chr2:64144081--chr2:38569925	1
DMS53	ctat-LR-fusion	PFKFB3--H3F3A	chr10:6145013--chr1:226064329	1
DMS53	ctat-LR-fusion	PFKP--GSTT2B	chr10:3103944--chr22:23958701	1
DMS53	ctat-LR-fusion	PFN2--GRP	chr3:149970725--chr18:59225492	1
DMS53	ctat-LR-fusion	PDIA4--STAG3L4	chr7:149018992--chr7:67320103	1
DMS53	ctat-LR-fusion	RABGGTB--FAF1	chr1:75787604--chr1:50596216	1
DMS53	ctat-LR-fusion	PREP--FBXL4	chr6:105323665--chr6:98905670	1
DMS53	ctat-LR-fusion	RAD51AP1--PPP2R2C	chr12:4543911--chr4:6329353	1
DMS53	ctat-LR-fusion	RPL27A--TACR1	chr11:8684892--chr2:75120768	1
DMS53	ctat-LR-fusion	RPL27A--RAN	chr11:8684892--chr12:130872836	1
DMS53	ctat-LR-fusion	RPL27A--MXRA7	chr11:8684892--chr17:76688176	1
DMS53	ctat-LR-fusion	RPL17--TMEM9B-AS1	chr18:49489359--chr11:8965904	1
DMS53	ctat-LR-fusion	RPL17--RNF149	chr18:49489359--chr2:101271744	1
DMS53	ctat-LR-fusion	RPH3AL--MAP3K6	chr17:281768--chr1:27357114	1
DMS53	ctat-LR-fusion	RPA1--SMG6	chr17:1830126--chr17:2188515	1
DMS53	ctat-LR-fusion	RP4-769N13.6--WDR27	chrX:102605653--chr6:169662424	1
DMS53	ctat-LR-fusion	RP4-756H11.3--KANSL2	chr7:66654626--chr12:48654175	1
DMS53	ctat-LR-fusion	RP3-449O17.1--TBC1D22A	chr22:38361399--chr22:46792520	1
DMS53	ctat-LR-fusion	RP3-449O17.1--RASA4B	chr22:38361399--chr7:102485159	1
DMS53	ctat-LR-fusion	RP3-399L15.3--ITGB3BP	chr6:113996060--chr1:63454968	1
DMS53	ctat-LR-fusion	RP11-967K21.1--MTPN	chr12:28164069--chr7:135930012	1
DMS53	ctat-LR-fusion	RP11-950C14.7--RPS6KL1	chr14:75127360--chr14:74911841	1
DMS53	ctat-LR-fusion	RP11-867G23.8--DSP	chr11:66349470--chr6:7582642	1
DMS53	ctat-LR-fusion	RP11-78F17.1--LRBA	chr18:976895--chr4:150265812	1
DMS53	ctat-LR-fusion	RP11-761E20.1--NR0B1	chrX:115968961--chrX:30304823	1
DMS53	ctat-LR-fusion	RP11-455G16.1--SSR1	chr4:119195393--chr6:7310029	1
DMS53	ctat-LR-fusion	RP11-465N4.4--EXOSC1	chr1:202009800--chr10:97437750	1
DMS53	ctat-LR-fusion	RP11-504P24.3--TP53BP2	chr1:223993047--chr1:223792522	1
DMS53	ctat-LR-fusion	RP11-507B12.1--RP11-507B12.2	chr15:61715115--chr15:61507240	1
DMS53	ctat-LR-fusion	RP11-545E17.3--MTERF3	chr9:128724635--chr8:96258700	1
DMS53	ctat-LR-fusion	RP11-580I16.2--NME1-NME2	chr17:47649396--chr17:51168242	1
DMS53	ctat-LR-fusion	RPL27A--TRMU	chr11:8684892--chr22:46355444	1
DMS53	ctat-LR-fusion	RP11-59N23.1--CMAS	chr12:21760085--chr12:22055149	1
DMS53	ctat-LR-fusion	RP11-59N23.3--MIR4435-1HG	chr12:21662771--chr2:111248241	1
DMS53	ctat-LR-fusion	RP11-6N13.1--AP3S1	chr5:105392761--chr5:115895087	1
DMS53	ctat-LR-fusion	RP11-6N13.1--CTD-2374C24.1	chr5:105392761--chr5:104917898	1
DMS53	ctat-LR-fusion	RP11-6N13.1--IVNS1ABP	chr5:105392761--chr1:185305643	1
DMS53	ctat-LR-fusion	RP11-6N13.1--LINC01170	chr5:105392761--chr5:124306291	1
DMS53	ctat-LR-fusion	RP11-733C7.1--IRF2BP2	chr4:138281739--chr1:234607852	1
DMS53	ctat-LR-fusion	RP11-59N23.3--CMAS	chr12:21662771--chr12:22055149	1
DMS53	ctat-LR-fusion	RP11-408B11.2--ALX1	chr12:85318115--chr12:85301155	1
DMS53	ctat-LR-fusion	RPL31--ITFG1	chr2:101006071--chr16:47162664	1
DMS53	ctat-LR-fusion	RPN2--CEP44	chr20:37184373--chr4:174299072	1
DMS53	ctat-LR-fusion	SGOL2--SLC39A10	chr2:200536142--chr2:195680032	1
DMS53	ctat-LR-fusion	SGMS1--BIRC2	chr10:50433476--chr11:102350346	1
DMS53	ctat-LR-fusion	SFTA3--CADPS	chr14:36513112--chr3:62403185	1
DMS53	ctat-LR-fusion	SF1--ZADH2	chr11:64776498--chr18:75202340	1
DMS53	ctat-LR-fusion	SF1--RPL10	chr11:64776498--chrX:154398497	1
DMS53	ctat-LR-fusion	SERTAD2--PELI1	chr2:64653620--chr2:64108379	1
DMS53	ctat-LR-fusion	SERGEF--ADIPOR2	chr11:17988597--chr12:1772842	1
DMS53	ctat-LR-fusion	SEPT11--NDUFS1	chr4:76974807--chr2:206124276	1
DMS53	ctat-LR-fusion	SEPT11--N6AMT2	chr4:76949930--chr13:20757617	1
DMS53	ctat-LR-fusion	SEC23IP--BAG3	chr10:119892945--chr10:119669851	1
DMS53	ctat-LR-fusion	SEC22C--ATXN10	chr3:42568865--chr22:45689712	1
DMS53	ctat-LR-fusion	SEC14L1--BIRC5	chr17:77089271--chr17:78216664	1
DMS53	ctat-LR-fusion	SDF4--HNRNPA1	chr1:1228468--chr12:54286662	1
DMS53	ctat-LR-fusion	SDCCAG8--CEP170	chr1:243256240--chr1:243225321	1
DMS53	ctat-LR-fusion	SDCBP2-AS1--RPL28	chr20:1325529--chr19:55386350	1
DMS53	ctat-LR-fusion	SCCPDH--SMYD3	chr1:246727004--chr1:245915640	1
DMS53	ctat-LR-fusion	SCAMP1--TMEM161B	chr5:78360728--chr5:88240916	1
DMS53	ctat-LR-fusion	RPN2--DYNLRB1	chr20:37213865--chr20:34526268	1
DMS53	ctat-LR-fusion	RPRD1A--GNB1	chr18:36067254--chr1:1839238	1
DMS53	ctat-LR-fusion	RPS18--TIMM9	chr6:33272726--chr14:58410938	1
DMS53	ctat-LR-fusion	RPS3--PTGES3	chr11:75404868--chr12:56664800	1
DMS53	ctat-LR-fusion	RPS6KA4--AMZ2	chr11:64359403--chr17:68248640	1
DMS53	ctat-LR-fusion	RAD17--SBDSP1	chr5:69370284--chr7:72830692	1
DMS53	ctat-LR-fusion	RPL31--YWHAZ	chr2:101006071--chr8:100948900	1
DMS53	ctat-LR-fusion	RRP12--R3HCC1L	chr10:97396218--chr10:98156093	1
DMS53	ctat-LR-fusion	S100A11--TYMS	chr1:152036913--chr18:670692	1
DMS53	ctat-LR-fusion	SAFB--FAM161A	chr19:5626489--chr2:61842360	1
DMS53	ctat-LR-fusion	SAMD12--UBE2E3	chr8:118580715--chr2:181057693	1
DMS53	ctat-LR-fusion	SAMHD1--AAR2	chr20:36904157--chr20:36239821	1
DMS53	ctat-LR-fusion	SAR1B--ZCCHC10	chr5:134620933--chr5:133011455	1
DMS53	ctat-LR-fusion	SBNO1--KANSL2	chr12:123364701--chr12:48655060	1
DMS53	ctat-LR-fusion	RTKN2--ERLIN1	chr10:62262625--chr10:100156234	1
DMS53	ctat-LR-fusion	RP11-396K3.1--HMGB3	chr7:73155343--chrX:150985595	1
DMS53	ctat-LR-fusion	RPTOR--SNAP47	chr17:80730706--chr1:227766959	1
DMS53	ctat-LR-fusion	RP11-364B6.1--TAF9	chr1:104073904--chr5:69366595	1
DMS53	ctat-LR-fusion	RIC3--CHCHD3	chr11:8168866--chr7:132838469	1
DMS53	ctat-LR-fusion	RHBDD1--GNAQ	chr2:226914351--chr9:77922345	1
DMS53	ctat-LR-fusion	RGS12--RPL27A	chr4:3343053--chr11:8685678	1
[truncated: 118,180 more rows]
