# Supplementary material for: Accurate fusion transcript identification from long- and short-read isoform sequencing at bulk or single-cell resolution
Source: Genome Res. 2025 Apr;35(4):967–86. doi: 10.1101/gr.279200.124 (PMC12047241; doi:10.1101/gr.279200.124)
Supplement: Supplement 5 [file Supplemental_Table_S4.xlsx]

## Sheet: Table_S4-ONT_fusions_by_method
# Table S4: Fusion predictions for cell lines based on ONT isoform sequencing derived from SG-NEx
# proxy_fusion_name: fusion name ordering reported by most methods (but either pair ordering is acceptable for fusion identification)
# runtype: 'fuzzy_brkpt_restricted' indicated if fusions are limited to those that have breakpoints +/- 5 bases of a reference exon boundary.
# as_truth: fusion is considered as included in the truth set for benchmarking purposes (known validated fusion or separately identified by STAR-Fusion or Arriba via Illumina reads)
# validated_fusion: a known previously validated fusion - see supplementary table S4 of PMID: 34991664 Davidson et al. Genome Biol. 2022
# matched_illumina: fusion separately identifeid by either STAR-Fusion or Arriba via the sample-matched SGNex Illumina reads
# other_illumina: K562 fusions identified by STAR-Fusion or Arriba via our own Illumina-sequenced K562 transcriptome (yields 3 additional 'truth' fusions).
proxy_fusion_name	sample	prog	num_reads	validated_fusion	matched_illumina	other_illumina
MCF7|BCAS3--BCAS4	MCF7	ctat-LR-fusion	3942	TRUE	starF,arriba	NA
MCF7|AC099850.1--VMP1	MCF7	ctat-LR-fusion	1106	TRUE	starF,arriba	NA
MCF7|ARFGEF2--SULF2	MCF7	ctat-LR-fusion	576	TRUE	starF,arriba	NA
MCF7|NBPF6--SLC25A24	MCF7	ctat-LR-fusion	252	TRUE	starF,arriba	NA
K562|BAG6--SLC44A4	K562	ctat-LR-fusion	176	FALSE	starF,arriba	starF,arriba
MCF7|PICALM--SYTL2	MCF7	ctat-LR-fusion	138	TRUE	starF,arriba	NA
MCF7|CA4--TANC2	MCF7	ctat-LR-fusion	66	FALSE	starF,arriba	NA
MCF7|ATP1A1--ZFP64	MCF7	ctat-LR-fusion	60	TRUE	starF	NA
MCF7|AHCYL1--RAD51C	MCF7	ctat-LR-fusion	58	TRUE	starF,arriba	NA
MCF7|AP4B1-AS1--RSBN1	MCF7	ctat-LR-fusion	54	TRUE	starF,arriba	NA
K562|NUP214--XKR3	K562	ctat-LR-fusion	50	TRUE	starF,arriba	starF,arriba
MCF7|ATXN7L3--FAM171A2	MCF7	ctat-LR-fusion	42	TRUE	starF,arriba	NA
MCF7|DIAPH3--RPS6KB1	MCF7	ctat-LR-fusion	42	TRUE	NA	NA
K562|ABL1--BCR	K562	ctat-LR-fusion	39	TRUE	starF,arriba	starF,arriba
MCF7|EMCN--SMARCC1	MCF7	ctat-LR-fusion	39	FALSE	starF,arriba	NA
K562|RP11-208G20.2--PSPHP1	K562	ctat-LR-fusion	36	FALSE	NA	NA
A549|SCAMP2--WDR72	A549	ctat-LR-fusion	35	TRUE	starF,arriba	NA
MCF7|FCHO1--MYO9B	MCF7	ctat-LR-fusion	33	TRUE	starF,arriba	NA
MCF7|GPM6A--SEZ6L2	MCF7	ctat-LR-fusion	31	FALSE	starF,arriba	NA
MCF7|BCAS4--ZMYND8	MCF7	ctat-LR-fusion	30	TRUE	starF	NA
A549|ACACA--PLXDC1	A549	ctat-LR-fusion	28	FALSE	starF,arriba	NA
K562|RPLP2--EFCAB3	K562	ctat-LR-fusion	27	FALSE	NA	NA
MCF7|RGS17--TBL1XR1	MCF7	ctat-LR-fusion	25	TRUE	starF,arriba	NA
MCF7|GBF1--MACROD2	MCF7	ctat-LR-fusion	22	FALSE	starF,arriba	NA
MCF7|EIF4E2--GIGYF2	MCF7	ctat-LR-fusion	18	FALSE	starF,arriba	NA
MCF7|LINC01588--NEMF	MCF7	ctat-LR-fusion	18	FALSE	starF,arriba	NA
MCF7|LPPR5--RP11-15E18.1	MCF7	ctat-LR-fusion	17	FALSE	starF	NA
MCF7|PDE8A--SCAND2P	MCF7	ctat-LR-fusion	16	FALSE	starF,arriba	NA
MCF7|BRIP1--TAF4	MCF7	ctat-LR-fusion	14	TRUE	starF	NA
MCF7|AP001347.6--ANKRD20A11P	MCF7	ctat-LR-fusion	13	FALSE	NA	NA
MCF7|GCN1L1--MSI1	MCF7	ctat-LR-fusion	12	TRUE	starF	NA
A549|RP11-69H14.6--ZNF43	A549	ctat-LR-fusion	11	FALSE	arriba	NA
MCF7|RBM6--BCAR1	MCF7	ctat-LR-fusion	11	FALSE	NA	NA
MCF7|GPR37L1--NAV1	MCF7	ctat-LR-fusion	10	TRUE	starF,arriba	NA
MCF7|CH17-264B6.3--UPK3B	MCF7	ctat-LR-fusion	10	FALSE	NA	NA
MCF7|ABCC1--C16orf45	MCF7	ctat-LR-fusion	8	TRUE	NA	NA
A549|AC026803.1--FTLP2	A549	ctat-LR-fusion	7	FALSE	NA	NA
K562|RP11-6N13.1--CTD-2374C24.1	K562	ctat-LR-fusion	7	FALSE	NA	NA
MCF7|AL512640.1--ASB7	MCF7	ctat-LR-fusion	7	FALSE	NA	NA
MCF7|PRICKLE2--SULF2	MCF7	ctat-LR-fusion	6	TRUE	starF,arriba	NA
A549|ANTXR2--KPNA2	A549	ctat-LR-fusion	6	FALSE	NA	NA
A549|LINC00152--ANAPC1	A549	ctat-LR-fusion	6	FALSE	NA	NA
A549|MIR4435-1HG--ANAPC1	A549	ctat-LR-fusion	6	FALSE	NA	NA
K562|C16orf87--ORC6	K562	ctat-LR-fusion	5	FALSE	starF,arriba	starF,arriba
K562|CEP70--FAIM	K562	ctat-LR-fusion	5	FALSE	NA	starF,arriba
MCF7|ADAMTS19--SLC27A6	MCF7	ctat-LR-fusion	5	TRUE	NA	NA
MCF7|ANKHD1--CYSTM1	MCF7	ctat-LR-fusion	5	FALSE	starF,arriba	NA
MCF7|MSL2--STAG1	MCF7	ctat-LR-fusion	5	FALSE	starF,arriba	NA
MCF7|SGPP2--ULK4	MCF7	ctat-LR-fusion	5	TRUE	NA	NA
MCF7|ATP9A--RP11-347D21.1	MCF7	ctat-LR-fusion	5	FALSE	NA	NA
MCF7|ELP2--CH507-513H4.1	MCF7	ctat-LR-fusion	5	FALSE	NA	NA
MCF7|EIF2B3--PSMC2	MCF7	ctat-LR-fusion	4	FALSE	starF	NA
MCF7|PRICKLE2--RP11-14D22.2	MCF7	ctat-LR-fusion	4	FALSE	starF	NA
A549|NCEH1--MUC13	A549	ctat-LR-fusion	4	FALSE	NA	NA
MCF7|UBE2E2--RP11-20B7.1	MCF7	ctat-LR-fusion	4	FALSE	NA	NA
MCF7|ABCA5--PPP4R1L	MCF7	ctat-LR-fusion	3	TRUE	starF,arriba	NA
MCF7|DENND2C--HIPK1	MCF7	ctat-LR-fusion	3	FALSE	starF,arriba	NA
MCF7|GSE1--RP11-680G10.1	MCF7	ctat-LR-fusion	3	FALSE	starF	NA
MCF7|NOC4L--MICALL2	MCF7	ctat-LR-fusion	3	FALSE	NA	NA
MCF7|PRSS23--SLC35C1	MCF7	ctat-LR-fusion	3	FALSE	NA	NA
MCF7|RP11-977B10.2--SLC16A7	MCF7	ctat-LR-fusion	3	FALSE	NA	NA
MCF7|SBNO2--TPGS1	MCF7	ctat-LR-fusion	3	FALSE	NA	NA
K562|GSE1--RP11-680G10.1	K562	ctat-LR-fusion	2	FALSE	starF	NA
K562|LRCH2--RP5-964N17.1	K562	ctat-LR-fusion	2	FALSE	starF	starF
MCF7|B3GNTL1--SLC9A8	MCF7	ctat-LR-fusion	2	TRUE	NA	NA
MCF7|GABPB2--SETDB1	MCF7	ctat-LR-fusion	2	FALSE	arriba	NA
MCF7|C11orf86--KDM2A	MCF7	ctat-LR-fusion	2	FALSE	starF,arriba	NA
MCF7|NCOA3--ZNF217	MCF7	ctat-LR-fusion	2	FALSE	arriba	NA
A549|DCBLD2--NIT2	A549	ctat-LR-fusion	2	FALSE	NA	NA
A549|MCM7--C9orf3	A549	ctat-LR-fusion	2	FALSE	NA	NA
A549|RP11-977G19.11--CTB-52I2.4	A549	ctat-LR-fusion	2	FALSE	NA	NA
K562|AC026803.1--FTLP2	K562	ctat-LR-fusion	2	FALSE	NA	NA
K562|RPL12--SNHG12	K562	ctat-LR-fusion	2	FALSE	NA	NA
MCF7|COQ2--FAM175A	MCF7	ctat-LR-fusion	2	FALSE	NA	NA
MCF7|CREB3L3--PTAFR	MCF7	ctat-LR-fusion	2	FALSE	NA	NA
MCF7|MSI2--AKAP1	MCF7	ctat-LR-fusion	2	FALSE	NA	NA
MCF7|RP4-813D12.3--RP4-724E16.2	MCF7	ctat-LR-fusion	2	FALSE	NA	NA
MCF7|ULK1--NOC4L	MCF7	ctat-LR-fusion	2	FALSE	NA	NA
MCF7|ATXN7--RAD51C	MCF7	ctat-LR-fusion	1	TRUE	starF,arriba	NA
A549|ABCC3--CDK5RAP3	A549	ctat-LR-fusion	1	FALSE	NA	NA
A549|CD44--PDHX	A549	ctat-LR-fusion	1	FALSE	NA	NA
A549|DTL--INTS7	A549	ctat-LR-fusion	1	FALSE	NA	NA
A549|NRP1--PARD3	A549	ctat-LR-fusion	1	FALSE	NA	NA
A549|LSAMP--RP11-384F7.2	A549	ctat-LR-fusion	1	FALSE	NA	NA
A549|TXNRD1--PHF14	A549	ctat-LR-fusion	1	FALSE	NA	NA
K562|PHF14--VWDE	K562	ctat-LR-fusion	1	FALSE	NA	NA
MCF7|BCAS3--BCAS4	MCF7	JAFFAL	3382	TRUE	starF,arriba	NA
MCF7|AC099850.1--VMP1	MCF7	JAFFAL	592	TRUE	starF,arriba	NA
MCF7|ARFGEF2--SULF2	MCF7	JAFFAL	253	TRUE	starF,arriba	NA
MCF7|NBPF6--SLC25A24	MCF7	JAFFAL	112	TRUE	starF,arriba	NA
MCF7|PICALM--SYTL2	MCF7	JAFFAL	54	TRUE	starF,arriba	NA
MCF7|AHCYL1--RAD51C	MCF7	JAFFAL	47	TRUE	starF,arriba	NA
MCF7|CA4--TANC2	MCF7	JAFFAL	46	FALSE	starF,arriba	NA
MCF7|DIAPH3--RPS6KB1	MCF7	JAFFAL	42	TRUE	NA	NA
MCF7|ATP1A1--ZFP64	MCF7	JAFFAL	38	TRUE	starF	NA
MCF7|AP4B1-AS1--RSBN1	MCF7	JAFFAL	37	TRUE	starF,arriba	NA
MCF7|BCAS4--ZMYND8	MCF7	JAFFAL	34	TRUE	starF	NA
MCF7|ATXN7L3--FAM171A2	MCF7	JAFFAL	26	TRUE	starF,arriba	NA
A549|SCAMP2--WDR72	A549	JAFFAL	25	TRUE	starF,arriba	NA
K562|NUP214--XKR3	K562	JAFFAL	24	TRUE	starF,arriba	starF,arriba
MCF7|GPM6A--SEZ6L2	MCF7	JAFFAL	22	FALSE	starF,arriba	NA
K562|ABL1--BCR	K562	JAFFAL	21	TRUE	starF,arriba	starF,arriba
A549|ACACA--PLXDC1	A549	JAFFAL	20	FALSE	starF,arriba	NA
MCF7|EIF4E2--GIGYF2	MCF7	JAFFAL	18	FALSE	starF,arriba	NA
MCF7|RGS17--TBL1XR1	MCF7	JAFFAL	18	TRUE	starF,arriba	NA
MCF7|FCHO1--MYO9B	MCF7	JAFFAL	15	TRUE	starF,arriba	NA
MCF7|GBF1--MACROD2	MCF7	JAFFAL	11	FALSE	starF,arriba	NA
MCF7|LINC01588--NEMF	MCF7	JAFFAL	11	FALSE	starF,arriba	NA
K562|BAG6--SLC44A4	K562	JAFFAL	9	FALSE	starF,arriba	starF,arriba
MCF7|GCN1L1--MSI1	MCF7	JAFFAL	9	TRUE	starF	NA
MCF7|EMCN--SMARCC1	MCF7	JAFFAL	9	FALSE	starF,arriba	NA
MCF7|LPPR5--RP11-15E18.1	MCF7	JAFFAL	8	FALSE	starF	NA
MCF7|NME1--MBTD1	MCF7	JAFFAL	8	FALSE	NA	NA
MCF7|RBM6--BCAR1	MCF7	JAFFAL	8	FALSE	NA	NA
A549|RP11-69H14.6--ZNF43	A549	JAFFAL	7	FALSE	arriba	NA
MCF7|PRICKLE2--SULF2	MCF7	JAFFAL	6	TRUE	starF,arriba	NA
MCF7|TANC2--TLK2	MCF7	JAFFAL	6	FALSE	starF,arriba	NA
MCF7|ABCC1--C16orf45	MCF7	JAFFAL	5	TRUE	NA	NA
MCF7|CDKN2B-AS1--RP11-145E5.5	MCF7	JAFFAL	5	TRUE	NA	NA
MCF7|ATP9A--RP11-347D21.1	MCF7	JAFFAL	5	FALSE	NA	NA
MCF7|ADAMTS19--SLC27A6	MCF7	JAFFAL	4	TRUE	NA	NA
MCF7|NCOA3--ZNF217	MCF7	JAFFAL	4	FALSE	arriba	NA
K562|C16orf87--ORC6	K562	JAFFAL	3	FALSE	starF,arriba	starF,arriba
MCF7|GPR37L1--NAV1	MCF7	JAFFAL	3	TRUE	starF,arriba	NA
MCF7|BCAS3--PARD6B	MCF7	JAFFAL	3	FALSE	starF	NA
MCF7|BRIP1--TAF4	MCF7	JAFFAL	3	TRUE	starF	NA
A549|RP11-983G14.1--ZNF43	A549	JAFFAL	3	FALSE	NA	NA
MCF7|SBNO2--TPGS1	MCF7	JAFFAL	3	FALSE	NA	NA
MCF7|ZKSCAN5--ARPC1A	MCF7	JAFFAL	3	FALSE	NA	NA
K562|CEP70--FAIM	K562	JAFFAL	2	FALSE	NA	starF,arriba
MCF7|B3GNTL1--SLC9A8	MCF7	JAFFAL	2	TRUE	NA	NA
MCF7|DENND2C--HIPK1	MCF7	JAFFAL	2	FALSE	starF,arriba	NA
MCF7|SGPP2--ULK4	MCF7	JAFFAL	2	TRUE	NA	NA
A549|ELP2--FHOD3	A549	JAFFAL	2	FALSE	NA	NA
A549|MIR4435-1HG--ANAPC1	A549	JAFFAL	2	FALSE	NA	NA
A549|NCEH1--MUC13	A549	JAFFAL	2	FALSE	NA	NA
K562|PSMB7--MAPKAP1	K562	JAFFAL	2	FALSE	NA	NA
K562|RPL12--SNHG12	K562	JAFFAL	2	FALSE	NA	NA
MCF7|RP11-977B10.2--SLC16A7	MCF7	JAFFAL	2	FALSE	NA	NA
MCF7|UBE2E2--RP11-20B7.1	MCF7	JAFFAL	2	FALSE	NA	NA
A549|CNIH1--KTN1	A549	JAFFAL	1	FALSE	NA	NA
MCF7|BCAS3--BCAS4	MCF7	LongGF	1947	TRUE	starF,arriba	NA
MCF7|ARFGEF2--SULF2	MCF7	LongGF	264	TRUE	starF,arriba	NA
MCF7|NBPF6--SLC25A24	MCF7	LongGF	99	TRUE	starF,arriba	NA
K562|BAG6--SLC44A4	K562	LongGF	56	FALSE	starF,arriba	starF,arriba
MCF7|PICALM--SYTL2	MCF7	LongGF	41	TRUE	starF,arriba	NA
MCF7|ATXN7L3--FAM171A2	MCF7	LongGF	24	TRUE	starF,arriba	NA
MCF7|AHCYL1--RAD51C	MCF7	LongGF	22	TRUE	starF,arriba	NA
MCF7|DIAPH3--RPS6KB1	MCF7	LongGF	21	TRUE	NA	NA
MCF7|RSBN1--VAV3	MCF7	LongGF	21	FALSE	arriba	NA
MCF7|CA4--TANC2	MCF7	LongGF	20	FALSE	starF,arriba	NA
A549|SCAMP2--WDR72	A549	LongGF	13	TRUE	starF,arriba	NA
K562|ABL1--BCR	K562	LongGF	13	TRUE	starF,arriba	starF,arriba
MCF7|BMP7--SULF2	MCF7	LongGF	12	FALSE	arriba	NA
MCF7|ATP1A1--ZFP64	MCF7	LongGF	12	TRUE	starF	NA
MCF7|EMCN--SMARCC1	MCF7	LongGF	11	FALSE	starF,arriba	NA
MCF7|BCAS4--ZMYND8	MCF7	LongGF	11	TRUE	starF	NA
MCF7|RGS17--TBL1XR1	MCF7	LongGF	10	TRUE	starF,arriba	NA
K562|NUP214--XKR3	K562	LongGF	9	TRUE	starF,arriba	starF,arriba
MCF7|RBM6--BCAR1	MCF7	LongGF	9	FALSE	NA	NA
MCF7|EIF4E2--GIGYF2	MCF7	LongGF	8	FALSE	starF,arriba	NA
MCF7|FCHO1--MYO9B	MCF7	LongGF	8	TRUE	starF,arriba	NA
MCF7|TANC2--TLK2	MCF7	LongGF	8	FALSE	starF,arriba	NA
MCF7|GBF1--MACROD2	MCF7	LongGF	7	FALSE	starF,arriba	NA
A549|ACACA--PLXDC1	A549	LongGF	6	FALSE	starF,arriba	NA
MCF7|ABCC1--C16orf45	MCF7	LongGF	6	TRUE	NA	NA
K562|RP11-255H23.2--COMMD1	K562	LongGF	6	FALSE	NA	NA
MCF7|BRIP1--ZNF217	MCF7	LongGF	6	FALSE	NA	NA
MCF7|GCN1L1--MSI1	MCF7	LongGF	5	TRUE	starF	NA
A549|RPS13--RPL23	A549	LongGF	5	FALSE	NA	NA
A549|ABHD2--VAPA	A549	LongGF	5	FALSE	NA	NA
K562|MED15--RPL14	K562	LongGF	5	FALSE	NA	NA
MCF7|EIF1--RPL35	MCF7	LongGF	5	FALSE	NA	NA
MCF7|BRIP1--TAF4	MCF7	LongGF	4	TRUE	starF	NA
A549|CAPNS1--FTH1	A549	LongGF	4	FALSE	NA	NA
A549|CLU--KRT7	A549	LongGF	4	FALSE	NA	NA
K562|RPL14--TBP	K562	LongGF	4	FALSE	NA	NA
MCF7|RPLP2--SLC35F2	MCF7	LongGF	4	FALSE	NA	NA
MCF7|AFF4--HSPA4	MCF7	LongGF	3	FALSE	arriba	NA
MCF7|FNDC3B--PLOD2	MCF7	LongGF	3	FALSE	arriba	NA
MCF7|SGPP2--ULK4	MCF7	LongGF	3	TRUE	NA	NA
A549|BCAS4--TMSB4X	A549	LongGF	3	FALSE	NA	NA
A549|CLEC2D--NPM1	A549	LongGF	3	FALSE	NA	NA
A549|COPS6--EIF1	A549	LongGF	3	FALSE	NA	NA
A549|MGST1--NME2	A549	LongGF	3	FALSE	NA	NA
A549|LDHA--MKKS	A549	LongGF	3	FALSE	NA	NA
A549|NCEH1--MUC13	A549	LongGF	3	FALSE	NA	NA
A549|EIF1--RPL35	A549	LongGF	3	FALSE	NA	NA
A549|NME1--RPS19	A549	LongGF	3	FALSE	NA	NA
K562|E2F4--RPL14	K562	LongGF	3	FALSE	NA	NA
MCF7|RP11-255H23.2--COMMD1	MCF7	LongGF	3	FALSE	NA	NA
MCF7|FTH1--COPS6	MCF7	LongGF	3	FALSE	NA	NA
MCF7|NIF3L1--ORC2	MCF7	LongGF	3	FALSE	NA	NA
MCF7|SBNO2--TPGS1	MCF7	LongGF	3	FALSE	NA	NA
MCF7|ZKSCAN5--ARPC1A	MCF7	LongGF	3	FALSE	NA	NA
K562|CEP70--FAIM	K562	LongGF	2	FALSE	NA	starF,arriba
K562|C16orf87--ORC6	K562	LongGF	2	FALSE	starF,arriba	starF,arriba
MCF7|B3GNTL1--SLC9A8	MCF7	LongGF	2	TRUE	NA	NA
MCF7|DSCAML1--TRAPPC4	MCF7	LongGF	2	FALSE	arriba	NA
MCF7|EIF2B3--PSMC2	MCF7	LongGF	2	FALSE	starF	NA
MCF7|GPR37L1--NAV1	MCF7	LongGF	2	TRUE	starF,arriba	NA
MCF7|BCAS3--PARD6B	MCF7	LongGF	2	FALSE	starF	NA
MCF7|ADAMTS19--SLC27A6	MCF7	LongGF	2	TRUE	NA	NA
MCF7|PPM1D--USP32	MCF7	LongGF	2	FALSE	arriba	NA
A549|ALDH1A1--ANXA2	A549	LongGF	2	FALSE	NA	NA
A549|BLVRB--RPS23	A549	LongGF	2	FALSE	NA	NA
A549|RP11-255H23.2--COMMD1	A549	LongGF	2	FALSE	NA	NA
A549|CYP24A1--C9orf3	A549	LongGF	2	FALSE	NA	NA
A549|ELP2--FHOD3	A549	LongGF	2	FALSE	NA	NA
A549|CTR9--RAP1B	A549	LongGF	2	FALSE	NA	NA
A549|ANXA2--RPL31	A549	LongGF	2	FALSE	NA	NA
A549|CAND2--PPIA	A549	LongGF	2	FALSE	NA	NA
A549|TRPA1--MSC	A549	LongGF	2	FALSE	NA	NA
K562|BCAS4--TMSB4X	K562	LongGF	2	FALSE	NA	NA
K562|PSMB7--MAPKAP1	K562	LongGF	2	FALSE	NA	NA
K562|RPS5--DSE	K562	LongGF	2	FALSE	NA	NA
K562|UNC50--HINT1	K562	LongGF	2	FALSE	NA	NA
MCF7|COQ2--FAM175A	MCF7	LongGF	2	FALSE	NA	NA
MCF7|GRM2--IP6K1	MCF7	LongGF	2	FALSE	NA	NA
MCF7|NOC4L--MICALL2	MCF7	LongGF	2	FALSE	NA	NA
MCF7|PFN1--UBB	MCF7	LongGF	2	FALSE	NA	NA
MCF7|RPS5--DSE	MCF7	LongGF	2	FALSE	NA	NA
MCF7|COMMD1--RPSA	MCF7	LongGF	2	FALSE	NA	NA
MCF7|RTCB--FAM19A5	MCF7	LongGF	2	FALSE	NA	NA
MCF7|ABHD2--VAPA	MCF7	LongGF	2	FALSE	NA	NA
K562|ALDOC--PHF12	K562	LongGF	1	FALSE	arriba	NA
MCF7|BEND7--PRPF18	MCF7	LongGF	1	FALSE	arriba	NA
MCF7|DHX30--EMCN	MCF7	LongGF	1	FALSE	arriba	NA
MCF7|NCOA3--ZNF217	MCF7	LongGF	1	FALSE	arriba	NA
MCF7|GABPB2--SETDB1	MCF7	LongGF	1	FALSE	arriba	NA
A549|SARNP--PTCD1	A549	LongGF	1	FALSE	NA	NA
A549|CRK--TOR1AIP2	A549	LongGF	1	FALSE	NA	NA
A549|DTL--INTS7	A549	LongGF	1	FALSE	NA	NA
A549|EEF1D--TMA7	A549	LongGF	1	FALSE	NA	NA
A549|ENO1--RPLP1	A549	LongGF	1	FALSE	NA	NA
A549|ENTPD4--TAPBP	A549	LongGF	1	FALSE	NA	NA
A549|GSTP1--TAF15	A549	LongGF	1	FALSE	NA	NA
A549|HNRNPUL1--UBA52	A549	LongGF	1	FALSE	NA	NA
A549|CBX5--LAPTM4A	A549	LongGF	1	FALSE	NA	NA
A549|MTHFD1--SNRPB	A549	LongGF	1	FALSE	NA	NA
A549|TXNRD1--PHF14	A549	LongGF	1	FALSE	NA	NA
A549|RP11-296A16.1--TIMM13	A549	LongGF	1	FALSE	NA	NA
A549|UBE3A--SNURF	A549	LongGF	1	FALSE	NA	NA
A549|URI1--ACTN4	A549	LongGF	1	FALSE	NA	NA
K562|CSDE1--ZNF354C	K562	LongGF	1	FALSE	NA	NA
K562|DCAF4--RPL36	K562	LongGF	1	FALSE	NA	NA
K562|DOCK8--TLN1	K562	LongGF	1	FALSE	NA	NA
K562|RP11-950C14.7--EZH1	K562	LongGF	1	FALSE	NA	NA
K562|FTL--GAPDH	K562	LongGF	1	FALSE	NA	NA
K562|HNRNPL--SH3BGRL3	K562	LongGF	1	FALSE	NA	NA
K562|NSUN5--TRIM73	K562	LongGF	1	FALSE	NA	NA
K562|PHF14--VWDE	K562	LongGF	1	FALSE	NA	NA
K562|RPS6KC1--PROSC	K562	LongGF	1	FALSE	NA	NA
K562|HBG2--RTN4	K562	LongGF	1	FALSE	NA	NA
K562|SLC35F2--RPLP2	K562	LongGF	1	FALSE	NA	NA
MCF7|CLEC2D--NPM1	MCF7	LongGF	1	FALSE	NA	NA
MCF7|COL5A3--DAPK3	MCF7	LongGF	1	FALSE	NA	NA
MCF7|CRHR2--INMT-FAM188B	MCF7	LongGF	1	FALSE	NA	NA
MCF7|ELP2--SLC39A6	MCF7	LongGF	1	FALSE	NA	NA
MCF7|GINM1--NQO1	MCF7	LongGF	1	FALSE	NA	NA
MCF7|IFT52--PHTF1	MCF7	LongGF	1	FALSE	NA	NA
MCF7|KRT18--EEF1A1	MCF7	LongGF	1	FALSE	NA	NA
MCF7|MRPL51--RPL30	MCF7	LongGF	1	FALSE	NA	NA
MCF7|PAIP2--SF1	MCF7	LongGF	1	FALSE	NA	NA
MCF7|TRPS1--EIF3H	MCF7	LongGF	1	FALSE	NA	NA
MCF7|ZNF706--DEGS1	MCF7	LongGF	1	FALSE	NA	NA
MCF7|BCAS3--BCAS4	MCF7	fusionseeker	3590	TRUE	starF,arriba	NA
K562|TXNRD1--RPL18A	K562	fusionseeker	1142	FALSE	NA	NA
MCF7|TXNRD1--RPL18A	MCF7	fusionseeker	1136	FALSE	NA	NA
MCF7|PTMA--DTWD2	MCF7	fusionseeker	1021	FALSE	NA	NA
MCF7|AC099850.1--VMP1	MCF7	fusionseeker	1008	TRUE	starF,arriba	NA
MCF7|RBFOX2--IL6ST	MCF7	fusionseeker	926	FALSE	NA	NA
MCF7|STEAP1B--EEF1A1P5	MCF7	fusionseeker	787	FALSE	NA	NA
K562|PCNP--RPS18	K562	fusionseeker	664	FALSE	NA	NA
MCF7|EEF1A1--STEAP1B	MCF7	fusionseeker	651	FALSE	NA	NA
MCF7|SMOC1--RPL7A	MCF7	fusionseeker	606	FALSE	NA	NA
MCF7|RP11-511B23.2--RBFOX2	MCF7	fusionseeker	554	FALSE	NA	NA
MCF7|RPS15A--KIZ	MCF7	fusionseeker	539	FALSE	NA	NA
MCF7|CAND2--NUDCD3	MCF7	fusionseeker	532	FALSE	NA	NA
MCF7|RPL41--RBFOX2	MCF7	fusionseeker	523	FALSE	NA	NA
MCF7|RPS25--CTD-2287O16.3	MCF7	fusionseeker	506	FALSE	NA	NA
MCF7|PCNP--RPS18	MCF7	fusionseeker	503	FALSE	NA	NA
MCF7|RPS2--AC004448.5	MCF7	fusionseeker	488	FALSE	NA	NA
MCF7|SULF2--ZNF217	MCF7	fusionseeker	485	FALSE	arriba	NA
MCF7|AMBRA1--RPS10	MCF7	fusionseeker	469	FALSE	NA	NA
MCF7|NKIRAS1--RPL15P3	MCF7	fusionseeker	460	FALSE	NA	NA
MCF7|RBFOX2--DGKI	MCF7	fusionseeker	460	FALSE	NA	NA
K562|AMBRA1--RPS10	K562	fusionseeker	418	FALSE	NA	NA
MCF7|CCSER1--TMSB4X	MCF7	fusionseeker	412	FALSE	NA	NA
K562|EEF1A1--STEAP1B	K562	fusionseeker	404	FALSE	NA	NA
K562|WDR47--C18orf32	K562	fusionseeker	380	FALSE	NA	NA
A549|TXNRD1--RPL18A	A549	fusionseeker	375	FALSE	NA	NA
MCF7|EEF1B2--POLA1	MCF7	fusionseeker	374	FALSE	NA	NA
A549|RBFOX2--IL6ST	A549	fusionseeker	344	FALSE	NA	NA
A549|EEF1B2--POLA1	A549	fusionseeker	342	FALSE	NA	NA
MCF7|RPLP0--AC016995.3	MCF7	fusionseeker	326	FALSE	NA	NA
MCF7|ARFGEF2--SULF2	MCF7	fusionseeker	315	TRUE	starF,arriba	NA
A549|WDR47--C18orf32	A549	fusionseeker	312	FALSE	NA	NA
MCF7|RPL41--IL6ST	MCF7	fusionseeker	312	FALSE	NA	NA
A549|PTMA--DTWD2	A549	fusionseeker	303	FALSE	NA	NA
K562|RBFOX2--IL6ST	K562	fusionseeker	300	FALSE	NA	NA
A549|CCSER1--TMSB4X	A549	fusionseeker	283	FALSE	NA	NA
MCF7|PTPRG--RPL10A	MCF7	fusionseeker	282	FALSE	NA	NA
K562|STEAP1B--EEF1A1P5	K562	fusionseeker	281	FALSE	NA	NA
MCF7|IL6ST--DGKI	MCF7	fusionseeker	281	FALSE	NA	NA
MCF7|RP11-192H23.4--RPS7	MCF7	fusionseeker	267	FALSE	NA	NA
MCF7|RP11-511B23.2--IL6ST	MCF7	fusionseeker	266	FALSE	NA	NA
MCF7|TAOK3--RPS2	MCF7	fusionseeker	264	FALSE	NA	NA
A549|FAM172A--NPM1	A549	fusionseeker	260	FALSE	NA	NA
K562|NKIRAS1--RPL15P3	K562	fusionseeker	253	FALSE	NA	NA
A549|SMOC1--RPL7A	A549	fusionseeker	251	FALSE	NA	NA
K562|CAND2--NUDCD3	K562	fusionseeker	251	FALSE	NA	NA
MCF7|AMBRA1--RPS10-NUDT3	MCF7	fusionseeker	239	FALSE	NA	NA
A549|EEF1A1--STEAP1B	A549	fusionseeker	237	FALSE	NA	NA
MCF7|ZYG11B--RPS13	MCF7	fusionseeker	237	FALSE	NA	NA
MCF7|RPL7P9--CSF1R	MCF7	fusionseeker	234	FALSE	NA	NA
K562|SMOC1--RPL7A	K562	fusionseeker	233	FALSE	NA	NA
MCF7|OOEP--RPL39	MCF7	fusionseeker	232	FALSE	NA	NA
A549|RP11-511B23.2--RBFOX2	A549	fusionseeker	228	FALSE	NA	NA
A549|RP11-192H23.4--RPS7	A549	fusionseeker	223	FALSE	NA	NA
MCF7|RPL41P1--RBFOX2	MCF7	fusionseeker	221	FALSE	NA	NA
MCF7|WDR47--C18orf32	MCF7	fusionseeker	216	FALSE	NA	NA
A549|RPL41--RBFOX2	A549	fusionseeker	211	FALSE	NA	NA
K562|RP11-511B23.2--RBFOX2	K562	fusionseeker	210	FALSE	NA	NA
A549|NKIRAS1--RPL15P3	A549	fusionseeker	203	FALSE	NA	NA
K562|RPS15A--KIZ	K562	fusionseeker	201	FALSE	NA	NA
MCF7|UBE2Q2P2--APOO	MCF7	fusionseeker	201	FALSE	NA	NA
K562|BAG6--SLC44A4	K562	fusionseeker	200	FALSE	starF,arriba	starF,arriba
MCF7|PIGK--C18orf32	MCF7	fusionseeker	186	FALSE	NA	NA
MCF7|RPL41--RP11-511B23.2	MCF7	fusionseeker	185	FALSE	NA	NA
A549|CAND2--NUDCD3	A549	fusionseeker	180	FALSE	NA	NA
K562|RPS25--CTD-2287O16.3	K562	fusionseeker	177	FALSE	NA	NA
MCF7|PPM1D--USP32	MCF7	fusionseeker	176	FALSE	arriba	NA
A549|OOEP--RPL39	A549	fusionseeker	176	FALSE	NA	NA
A549|RBFOX2--DGKI	A549	fusionseeker	176	FALSE	NA	NA
K562|RPL41--RBFOX2	K562	fusionseeker	174	FALSE	NA	NA
A549|RPS15A--KIZ	A549	fusionseeker	173	FALSE	NA	NA
K562|RPLP0--AC016995.3	K562	fusionseeker	170	FALSE	NA	NA
K562|EEF1B2--POLA1	K562	fusionseeker	165	FALSE	NA	NA
K562|CCSER1--TMSB4X	K562	fusionseeker	163	FALSE	NA	NA
K562|ZYG11B--RPS13	K562	fusionseeker	160	FALSE	NA	NA
A549|RP11-255H23.2--RPSA	A549	fusionseeker	157	FALSE	NA	NA
MCF7|HMGN2--HS3ST4	MCF7	fusionseeker	157	FALSE	NA	NA
K562|RPS2--AC004448.5	K562	fusionseeker	156	FALSE	NA	NA
K562|OOEP--RPL39	K562	fusionseeker	155	FALSE	NA	NA
MCF7|FAM172A--NPM1	MCF7	fusionseeker	153	FALSE	NA	NA
MCF7|RPL41P1--IL6ST	MCF7	fusionseeker	153	FALSE	NA	NA
K562|RBFOX2--DGKI	K562	fusionseeker	152	FALSE	NA	NA
MCF7|RPL29--SLC35F1	MCF7	fusionseeker	152	FALSE	NA	NA
K562|AMBRA1--RPS10-NUDT3	K562	fusionseeker	151	FALSE	NA	NA
K562|PTMA--DTWD2	K562	fusionseeker	151	FALSE	NA	NA
K562|PTPRG--RPL10A	K562	fusionseeker	149	FALSE	NA	NA
A549|AMBRA1--RPS10	A549	fusionseeker	144	FALSE	NA	NA
MCF7|KRT8--ASPH	MCF7	fusionseeker	140	FALSE	NA	NA
A549|IL6ST--DGKI	A549	fusionseeker	137	FALSE	NA	NA
MCF7|HMGB1--THSD4	MCF7	fusionseeker	137	FALSE	NA	NA
A549|BEST1--FTH1P20	A549	fusionseeker	134	FALSE	NA	NA
K562|PIGK--C18orf32	K562	fusionseeker	134	FALSE	NA	NA
MCF7|RPS8--CTD-2066L21.3	MCF7	fusionseeker	133	FALSE	NA	NA
A549|PCNP--RPS18	A549	fusionseeker	132	FALSE	NA	NA
A549|RPL41--IL6ST	A549	fusionseeker	128	FALSE	NA	NA
K562|RPL7P9--CSF1R	K562	fusionseeker	127	FALSE	NA	NA
MCF7|RPS3A--BAIAP2L1	MCF7	fusionseeker	126	FALSE	NA	NA
K562|RP11-192H23.4--RPS7	K562	fusionseeker	125	FALSE	NA	NA
MCF7|RPL22--MECOM	MCF7	fusionseeker	125	FALSE	NA	NA
MCF7|RPL4--MAP3K13	MCF7	fusionseeker	125	FALSE	NA	NA
A549|RP11-511B23.2--IL6ST	A549	fusionseeker	123	FALSE	NA	NA
MCF7|RP11-255H23.2--RPSA	MCF7	fusionseeker	121	FALSE	NA	NA
MCF7|RPL24--MAMDC2	MCF7	fusionseeker	116	FALSE	NA	NA
MCF7|RP11-511B23.2--DGKI	MCF7	fusionseeker	116	FALSE	NA	NA
A549|MIR1539--RP4-706A16.3	A549	fusionseeker	115	FALSE	NA	NA
A549|STEAP1B--EEF1A1P5	A549	fusionseeker	115	FALSE	NA	NA
A549|TRAPPC4--CTD-2287O16.1	A549	fusionseeker	114	FALSE	NA	NA
K562|RPS8--CTD-2066L21.3	K562	fusionseeker	114	FALSE	NA	NA
MCF7|H3F3A--AC018890.6	MCF7	fusionseeker	112	FALSE	NA	NA
K562|IL6ST--DGKI	K562	fusionseeker	110	FALSE	NA	NA
K562|PIGK--WDR47	K562	fusionseeker	108	FALSE	NA	NA
A549|RPS2--AC004448.5	A549	fusionseeker	104	FALSE	NA	NA
MCF7|SEMA6D--RPL7A	MCF7	fusionseeker	103	FALSE	NA	NA
A549|RPL7P9--CSF1R	A549	fusionseeker	101	FALSE	NA	NA
MCF7|RP11-556K13.1--RP11-255H23.2	MCF7	fusionseeker	100	FALSE	NA	NA
K562|RPL22--MECOM	K562	fusionseeker	99	FALSE	NA	NA
MCF7|RP11-244M2.1--RPL7A	MCF7	fusionseeker	99	FALSE	NA	NA
MCF7|RP11-968A15.8--HNRNPA1P48	MCF7	fusionseeker	97	FALSE	NA	NA
K562|UBE2Q2P2--APOO	K562	fusionseeker	94	FALSE	NA	NA
MCF7|FBXO42--SZRD1	MCF7	fusionseeker	94	FALSE	NA	NA
K562|RPL41--IL6ST	K562	fusionseeker	92	FALSE	NA	NA
K562|RP11-511B23.2--IL6ST	K562	fusionseeker	92	FALSE	NA	NA
A549|RP11-556K13.1--RP11-255H23.2	A549	fusionseeker	91	FALSE	NA	NA
K562|HMGN2--HS3ST4	K562	fusionseeker	91	FALSE	NA	NA
MCF7|RP11-356O9.1--FOXA1	MCF7	fusionseeker	91	FALSE	NA	NA
A549|RP11-968A15.8--GAREM	A549	fusionseeker	88	FALSE	NA	NA
A549|RPLP0--AC016995.3	A549	fusionseeker	87	FALSE	NA	NA
A549|ZYG11B--RPS13	A549	fusionseeker	87	FALSE	NA	NA
MCF7|RPS3--EIF2B5	MCF7	fusionseeker	87	FALSE	NA	NA
K562|RP11-255H23.2--RPSA	K562	fusionseeker	84	FALSE	NA	NA
K562|TAOK3--RPS2	K562	fusionseeker	84	FALSE	NA	NA
MCF7|RP11-511B23.2--RPL41P1	MCF7	fusionseeker	83	FALSE	NA	NA
MCF7|RP11-848P1.9--RBFOX2	MCF7	fusionseeker	83	FALSE	NA	NA
K562|RP11-179A16.1--ELAVL1	K562	fusionseeker	82	FALSE	NA	NA
K562|RPL41P1--IL6ST	K562	fusionseeker	82	FALSE	NA	NA
MCF7|RPL6P27--EPHA5	MCF7	fusionseeker	81	FALSE	NA	NA
A549|KRT8--ASPH	A549	fusionseeker	80	FALSE	NA	NA
K562|FAM172A--NPM1	K562	fusionseeker	79	FALSE	NA	NA
MCF7|DISC1FP1--TUBA1B	MCF7	fusionseeker	79	FALSE	NA	NA
MCF7|NBPF6--SLC25A24	MCF7	fusionseeker	77	TRUE	starF,arriba	NA
K562|RP11-556K13.1--RP11-255H23.2	K562	fusionseeker	77	FALSE	NA	NA
K562|RPL4--MAP3K13	K562	fusionseeker	76	FALSE	NA	NA
MCF7|RPS3AP6--BAIAP2L1	MCF7	fusionseeker	76	FALSE	NA	NA
MCF7|RP11-968A15.8--ZNF833P	MCF7	fusionseeker	74	FALSE	NA	NA
MCF7|RSBN1--VAV3	MCF7	fusionseeker	73	FALSE	arriba	NA
MCF7|RP11-968A15.8--GAREM	MCF7	fusionseeker	72	FALSE	NA	NA
A549|PTPRG--RPL10A	A549	fusionseeker	71	FALSE	NA	NA
A549|RPL41P1--IL6ST	A549	fusionseeker	71	FALSE	NA	NA
MCF7|RPL6P27--DGKI	MCF7	fusionseeker	71	FALSE	NA	NA
A549|RP11-511B23.2--DGKI	A549	fusionseeker	70	FALSE	NA	NA
MCF7|RP11-170M17.1--RPL7A	MCF7	fusionseeker	68	FALSE	NA	NA
MCF7|UBE2Q2P2--RPL9	MCF7	fusionseeker	68	FALSE	NA	NA
MCF7|PIGK--WDR47	MCF7	fusionseeker	67	FALSE	NA	NA
A549|MTAP--RP11-408N14.1	A549	fusionseeker	66	FALSE	arriba	NA
A549|HMGN2--HS3ST4	A549	fusionseeker	66	FALSE	NA	NA
K562|BEST1--SCHLAP1	K562	fusionseeker	66	FALSE	NA	NA
K562|PPP1R12B--TSPAN9	K562	fusionseeker	65	FALSE	NA	NA
K562|RPL41P1--RBFOX2	K562	fusionseeker	65	FALSE	NA	NA
MCF7|RPS3--SSR1	MCF7	fusionseeker	65	FALSE	NA	NA
A549|KCP--PTPRN2	A549	fusionseeker	64	FALSE	NA	NA
K562|RPL41--RP11-511B23.2	K562	fusionseeker	64	FALSE	NA	NA
MCF7|PCOLCE2--RPL8	MCF7	fusionseeker	64	FALSE	NA	NA
MCF7|RPL27A--RP11-306O13.1	MCF7	fusionseeker	64	FALSE	NA	NA
K562|UBE2Q2P2--RPL9	K562	fusionseeker	63	FALSE	NA	NA
MCF7|CPEB3--RMND5B	MCF7	fusionseeker	63	FALSE	NA	NA
A549|PIGK--WDR47	A549	fusionseeker	61	FALSE	NA	NA
K562|RPL27A--RP11-306O13.1	K562	fusionseeker	61	FALSE	NA	NA
K562|RPS3AP6--BAIAP2L1	K562	fusionseeker	61	FALSE	NA	NA
A549|TAOK3--RPS2	A549	fusionseeker	60	FALSE	NA	NA
MCF7|HERC2--RBFOX2	MCF7	fusionseeker	60	FALSE	NA	NA
MCF7|THSD4--HMGB1P5	MCF7	fusionseeker	59	FALSE	NA	NA
MCF7|RP5-875O13.7--EIF1AX	MCF7	fusionseeker	58	FALSE	NA	NA
MCF7|PPP1R12B--TSPAN9	MCF7	fusionseeker	57	FALSE	NA	NA
A549|HMGB1--THSD4	A549	fusionseeker	56	FALSE	NA	NA
A549|RPL41--RP11-511B23.2	A549	fusionseeker	56	FALSE	NA	NA
A549|RP11-968A15.8--HNRNPA1P48	A549	fusionseeker	55	FALSE	NA	NA
A549|RPL4--MAP3K13	A549	fusionseeker	55	FALSE	NA	NA
A549|RPL41P1--RBFOX2	A549	fusionseeker	55	FALSE	NA	NA
MCF7|BCL2L14--PTMA	MCF7	fusionseeker	55	FALSE	NA	NA
K562|RPS3A--BAIAP2L1	K562	fusionseeker	54	FALSE	NA	NA
MCF7|PTMAP5--DTWD2	MCF7	fusionseeker	54	FALSE	NA	NA
MCF7|AHCYL1--RAD51C	MCF7	fusionseeker	52	TRUE	starF,arriba	NA
MCF7|GNB1L--RPL7A	MCF7	fusionseeker	52	FALSE	NA	NA
MCF7|GOLGA3--RPS11	MCF7	fusionseeker	52	FALSE	NA	NA
MCF7|BCAS4--ZMYND8	MCF7	fusionseeker	51	TRUE	starF	NA
A549|RPS3A--BAIAP2L1	A549	fusionseeker	51	FALSE	NA	NA
MCF7|AC018890.6--MGST2	MCF7	fusionseeker	51	FALSE	NA	NA
MCF7|EIF3CL--RP11-57A19.4	MCF7	fusionseeker	51	FALSE	NA	NA
K562|RP11-208G20.2--PSPHP1	K562	fusionseeker	50	FALSE	NA	NA
K562|RP11-968A15.8--HNRNPA1P48	K562	fusionseeker	50	FALSE	NA	NA
A549|RPS8--CTD-2066L21.3	A549	fusionseeker	49	FALSE	NA	NA
K562|RP11-968A15.8--ZNF833P	K562	fusionseeker	49	FALSE	NA	NA
MCF7|RP11-179A16.1--ELAVL1	MCF7	fusionseeker	49	FALSE	NA	NA
MCF7|RPS2--XPO5	MCF7	fusionseeker	49	FALSE	NA	NA
MCF7|TSPAN9--RP11-761N21.2	MCF7	fusionseeker	49	FALSE	NA	NA
MCF7|BEND7--PRPF18	MCF7	fusionseeker	48	FALSE	arriba	NA
MCF7|BANF1--CAB39	MCF7	fusionseeker	48	FALSE	NA	NA
MCF7|RPL41P1--DGKI	MCF7	fusionseeker	48	FALSE	NA	NA
A549|RP11-968A15.8--ZNF833P	A549	fusionseeker	47	FALSE	NA	NA
A549|RPL22--MECOM	A549	fusionseeker	47	FALSE	NA	NA
K562|H3F3A--AC018890.6	K562	fusionseeker	47	FALSE	NA	NA
K562|KCP--PTPRN2	K562	fusionseeker	47	FALSE	NA	NA
MCF7|CA4--TANC2	MCF7	fusionseeker	45	FALSE	starF,arriba	NA
MCF7|PLEKHA7--RPL36A	MCF7	fusionseeker	45	FALSE	NA	NA
A549|FAIM2--GRM4	A549	fusionseeker	44	FALSE	NA	NA
A549|RP11-244M2.1--RPL7A	A549	fusionseeker	44	FALSE	NA	NA
MCF7|RPS24--GPC3	MCF7	fusionseeker	43	FALSE	NA	NA
A549|UBE2Q2P2--APOO	A549	fusionseeker	42	FALSE	NA	NA
MCF7|RP11-968A15.8--FAM126B	MCF7	fusionseeker	42	FALSE	NA	NA
MCF7|RPLP2--SLC35F2	MCF7	fusionseeker	42	FALSE	NA	NA
A549|H3F3A--AC018890.6	A549	fusionseeker	41	FALSE	NA	NA
K562|RP11-511B23.2--DGKI	K562	fusionseeker	41	FALSE	NA	NA
A549|RPL29--SLC35F1	A549	fusionseeker	40	FALSE	NA	NA
K562|COMMD1--RPSAP58	K562	fusionseeker	40	FALSE	NA	NA
MCF7|BEST1--SCHLAP1	MCF7	fusionseeker	40	FALSE	NA	NA
A549|AMBRA1--RPS10-NUDT3	A549	fusionseeker	39	FALSE	NA	NA
K562|RPL29--SLC35F1	K562	fusionseeker	39	FALSE	NA	NA
MCF7|GPM6A--SEZ6L2	MCF7	fusionseeker	38	FALSE	starF,arriba	NA
K562|DISC1FP1--TUBA1B	K562	fusionseeker	38	FALSE	NA	NA
K562|RPS24--GPC3	K562	fusionseeker	38	FALSE	NA	NA
MCF7|AMBRA1--RP11-274B21.1	MCF7	fusionseeker	38	FALSE	NA	NA
MCF7|HMGN2--SV2C	MCF7	fusionseeker	38	FALSE	NA	NA
MCF7|TAOK3--AC004448.5	MCF7	fusionseeker	38	FALSE	NA	NA
MCF7|TBCA--ACTB	MCF7	fusionseeker	38	FALSE	NA	NA
K562|NUP214--XKR3	K562	fusionseeker	37	TRUE	starF,arriba	starF,arriba
A549|RP11-848P1.9--RBFOX2	A549	fusionseeker	37	FALSE	NA	NA
K562|TSPAN9--RP11-761N21.2	K562	fusionseeker	37	FALSE	NA	NA
MCF7|RP11-848P1.9--DGKI	MCF7	fusionseeker	37	FALSE	NA	NA
MCF7|SLC27A4--TMSB4X	MCF7	fusionseeker	37	FALSE	NA	NA
MCF7|AC004448.5--RPS2P55	MCF7	fusionseeker	36	FALSE	NA	NA
MCF7|RPS3A--JMY	MCF7	fusionseeker	36	FALSE	NA	NA
MCF7|SBF2--DNAJC25-GNG10	MCF7	fusionseeker	36	FALSE	NA	NA
MCF7|TXNRD1--AC079250.1	MCF7	fusionseeker	36	FALSE	NA	NA
A549|TBCA--ACTB	A549	fusionseeker	35	FALSE	NA	NA
MCF7|A2MP1--PTMA	MCF7	fusionseeker	35	FALSE	NA	NA
MCF7|GPN3--RPL31	MCF7	fusionseeker	35	FALSE	NA	NA
MCF7|HMGN2--TJP1	MCF7	fusionseeker	35	FALSE	NA	NA
A549|RP11-170M17.1--RPL7A	A549	fusionseeker	34	FALSE	NA	NA
MCF7|BCAS4--MIR646HG	MCF7	fusionseeker	34	FALSE	NA	NA
A549|BEST1--RSF1	A549	fusionseeker	33	FALSE	NA	NA
K562|GOLGA3--RPS11	K562	fusionseeker	33	FALSE	NA	NA
K562|RP11-968A15.8--GAREM	K562	fusionseeker	33	FALSE	NA	NA
MCF7|HNRNPC--C2orf88	MCF7	fusionseeker	33	FALSE	NA	NA
MCF7|RP11-848P1.9--IL6ST	MCF7	fusionseeker	33	FALSE	NA	NA
MCF7|RPL7P9--WDR41	MCF7	fusionseeker	33	FALSE	NA	NA
MCF7|SRP9--TNKS2	MCF7	fusionseeker	33	FALSE	NA	NA
A549|CPEB3--RMND5B	A549	fusionseeker	32	FALSE	NA	NA
A549|RP11-179A16.1--ELAVL1	A549	fusionseeker	32	FALSE	NA	NA
K562|HMGN2--TJP1	K562	fusionseeker	32	FALSE	NA	NA
MCF7|VMP1--LINC00475	MCF7	fusionseeker	32	FALSE	NA	NA
K562|RP11-511B23.2--RPL41P1	K562	fusionseeker	31	FALSE	NA	NA
MCF7|BCAS4--TMSB4X	MCF7	fusionseeker	31	FALSE	NA	NA
MCF7|ATP1A1--ZFP64	MCF7	fusionseeker	30	TRUE	starF	NA
A549|EIF5--SHROOM2	A549	fusionseeker	30	FALSE	NA	NA
MCF7|AC072062.1--CTC-575D19.1	MCF7	fusionseeker	30	FALSE	NA	NA
MCF7|GGACT--ANK2	MCF7	fusionseeker	30	FALSE	NA	NA
MCF7|KRT18--PCDH11Y	MCF7	fusionseeker	30	FALSE	NA	NA
MCF7|MLH1--RPL29	MCF7	fusionseeker	30	FALSE	NA	NA
MCF7|AP4B1-AS1--RSBN1	MCF7	fusionseeker	29	TRUE	starF,arriba	NA
A549|ANK2--PTPRD	A549	fusionseeker	29	FALSE	NA	NA
A549|RP5-875O13.7--EIF1AX	A549	fusionseeker	29	FALSE	NA	NA
MCF7|ANK2--GS1-184P14.2	MCF7	fusionseeker	29	FALSE	NA	NA
MCF7|CTD-2192J16.15--AC072062.1	MCF7	fusionseeker	29	FALSE	NA	NA
MCF7|HERC2--IL6ST	MCF7	fusionseeker	29	FALSE	NA	NA
MCF7|PPP1R14B--ELF2	MCF7	fusionseeker	29	FALSE	NA	NA
MCF7|RPS27--TSPAN9	MCF7	fusionseeker	29	FALSE	NA	NA
MCF7|CCDC51--CTB-79E8.3	MCF7	fusionseeker	29	FALSE	NA	NA
A549|GGACT--ANK2	A549	fusionseeker	28	FALSE	NA	NA
K562|RP11-244M2.1--RPL7A	K562	fusionseeker	28	FALSE	NA	NA
MCF7|EIF4B--LHFPL3	MCF7	fusionseeker	28	FALSE	NA	NA
MCF7|RP11-255H23.2--RPSAP15	MCF7	fusionseeker	28	FALSE	NA	NA
MCF7|ATXN7L3--FAM171A2	MCF7	fusionseeker	27	TRUE	starF,arriba	NA
K562|AC018890.6--MGST2	K562	fusionseeker	27	FALSE	NA	NA
K562|ANK2--GS1-184P14.2	K562	fusionseeker	27	FALSE	NA	NA
K562|HMGB1--THSD4	K562	fusionseeker	27	FALSE	NA	NA
K562|RPL6P27--EPHA5	K562	fusionseeker	27	FALSE	NA	NA
K562|RPSAP54--RP11-255H23.2	K562	fusionseeker	27	FALSE	NA	NA
MCF7|PPIAP22--ATG10	MCF7	fusionseeker	27	FALSE	NA	NA
MCF7|RP11-159F24.3--EEF1A1	MCF7	fusionseeker	27	FALSE	NA	NA
MCF7|SNX6--RPS19	MCF7	fusionseeker	27	FALSE	NA	NA
MCF7|PICALM--SYTL2	MCF7	fusionseeker	26	TRUE	starF,arriba	NA
A549|ANK2--GS1-184P14.2	A549	fusionseeker	26	FALSE	NA	NA
A549|ITGB1--EMR3	A549	fusionseeker	26	FALSE	NA	NA
A549|THSD4--HMGB1P5	A549	fusionseeker	26	FALSE	NA	NA
K562|FAM35DP--RHEB	K562	fusionseeker	26	FALSE	NA	NA
K562|ZNF44--RPL28	K562	fusionseeker	26	FALSE	NA	NA
MCF7|BRIP1--ZNF217	MCF7	fusionseeker	26	FALSE	NA	NA
MCF7|BZW1--LSAMP	MCF7	fusionseeker	26	FALSE	NA	NA
MCF7|CD24--TTTY14	MCF7	fusionseeker	26	FALSE	NA	NA
MCF7|NPM1--CLVS1	MCF7	fusionseeker	26	FALSE	NA	NA
MCF7|THSD4--C18orf32	MCF7	fusionseeker	26	FALSE	NA	NA
MCF7|WDR47--THSD4	MCF7	fusionseeker	26	FALSE	NA	NA
MCF7|CHEK2--CTA-292E10.6	MCF7	fusionseeker	25	FALSE	arriba	NA
A549|KRT18--PCDH11X	A549	fusionseeker	25	FALSE	NA	NA
A549|RPS24--GPC3	A549	fusionseeker	25	FALSE	NA	NA
K562|HMGN2--SV2C	K562	fusionseeker	25	FALSE	NA	NA
MCF7|CCDC30--TMSB4X	MCF7	fusionseeker	25	FALSE	NA	NA
MCF7|EEF1A1P11--STEAP1B	MCF7	fusionseeker	25	FALSE	NA	NA
MCF7|RP11-511B23.2--RP11-848P1.9	MCF7	fusionseeker	25	FALSE	NA	NA
MCF7|RPS15A--LEPROTL1	MCF7	fusionseeker	25	FALSE	NA	NA
MCF7|DNAJB1--TECRP1	MCF7	fusionseeker	25	FALSE	NA	NA
K562|ALDOC--PHF12	K562	fusionseeker	24	FALSE	arriba	NA
MCF7|DIAPH3--RPS6KB1	MCF7	fusionseeker	24	TRUE	NA	NA
A549|CFAP46--KCP	A549	fusionseeker	24	FALSE	NA	NA
A549|DAB1--ANK2	A549	fusionseeker	24	FALSE	NA	NA
A549|DISC1FP1--TUBA1B	A549	fusionseeker	24	FALSE	NA	NA
A549|PGAM1--GLT8D2	A549	fusionseeker	24	FALSE	NA	NA
A549|RP11-983G14.1--ZNF43	A549	fusionseeker	24	FALSE	NA	NA
A549|RPS3AP6--BAIAP2L1	A549	fusionseeker	24	FALSE	NA	NA
K562|FTH1--SCHLAP1	K562	fusionseeker	24	FALSE	NA	NA
K562|HERC2--RBFOX2	K562	fusionseeker	24	FALSE	NA	NA
K562|RP11-254B13.1--RP11-255H23.2	K562	fusionseeker	24	FALSE	NA	NA
K562|RP11-848P1.9--RBFOX2	K562	fusionseeker	24	FALSE	NA	NA
K562|RPL24--MAMDC2	K562	fusionseeker	24	FALSE	NA	NA
K562|RPL9--APOO	K562	fusionseeker	24	FALSE	NA	NA
K562|SLC35F2--RPLP2	K562	fusionseeker	24	FALSE	NA	NA
MCF7|CKS1B--KIF2A	MCF7	fusionseeker	24	FALSE	NA	NA
MCF7|RP11-192H23.4--NSF	MCF7	fusionseeker	24	FALSE	NA	NA
A549|BANF1--CAB39	A549	fusionseeker	23	FALSE	NA	NA
A549|HNRNPC--C2orf88	A549	fusionseeker	23	FALSE	NA	NA
A549|PPP1R12B--TSPAN9	A549	fusionseeker	23	FALSE	NA	NA
A549|RP11-511B23.2--RPL41P1	A549	fusionseeker	23	FALSE	NA	NA
A549|RP11-672A2.1--GRM4	A549	fusionseeker	23	FALSE	NA	NA
A549|UQCRFS1--ENTHD1	A549	fusionseeker	23	FALSE	NA	NA
K562|AC007405.4--RALY	K562	fusionseeker	23	FALSE	NA	NA
K562|RP5-875O13.7--EIF1AX	K562	fusionseeker	23	FALSE	NA	NA
MCF7|CSDE1--ZNF354C	MCF7	fusionseeker	23	FALSE	NA	NA
MCF7|DCAF6--RP11-303E16.8	MCF7	fusionseeker	23	FALSE	NA	NA
MCF7|EEF1A1P13--STEAP1B	MCF7	fusionseeker	23	FALSE	NA	NA
MCF7|FAM174B--HMGN1	MCF7	fusionseeker	23	FALSE	NA	NA
A549|SCAMP2--WDR72	A549	fusionseeker	22	TRUE	starF,arriba	NA
A549|BCAS4--TMSB4X	A549	fusionseeker	22	FALSE	NA	NA
A549|CD24--TTTY14	A549	fusionseeker	22	FALSE	NA	NA
A549|GNB1L--RPL7A	A549	fusionseeker	22	FALSE	NA	NA
A549|HERC2--IL6ST	A549	fusionseeker	22	FALSE	NA	NA
A549|RPL24--MAMDC2	A549	fusionseeker	22	FALSE	NA	NA
A549|RPL27A--RP11-306O13.1	A549	fusionseeker	22	FALSE	NA	NA
A549|SLC27A4--TMSB4X	A549	fusionseeker	22	FALSE	NA	NA
K562|SEMA6D--RPL7A	K562	fusionseeker	22	FALSE	NA	NA
K562|TAOK3--AC004448.5	K562	fusionseeker	22	FALSE	NA	NA
K562|THSD4--C18orf32	K562	fusionseeker	22	FALSE	NA	NA
K562|TXNRD1--AC079250.1	K562	fusionseeker	22	FALSE	NA	NA
MCF7|KRT18--PCDH11X	MCF7	fusionseeker	22	FALSE	NA	NA
MCF7|NUTF2--CEP112	MCF7	fusionseeker	22	FALSE	NA	NA
MCF7|PIGK--THSD4	MCF7	fusionseeker	22	FALSE	NA	NA
MCF7|RP11-254B13.1--RP11-255H23.2	MCF7	fusionseeker	22	FALSE	NA	NA
MCF7|COMMD1--RPSAP58	MCF7	fusionseeker	22	FALSE	NA	NA
MCF7|RPL7P9--PNPLA8	MCF7	fusionseeker	22	FALSE	NA	NA
MCF7|YWHAQ--EFCAB6	MCF7	fusionseeker	22	FALSE	NA	NA
MCF7|NCOA3--ZNF217	MCF7	fusionseeker	21	FALSE	arriba	NA
A549|RPL6P27--EPHA5	A549	fusionseeker	21	FALSE	NA	NA
A549|THSD4--C18orf32	A549	fusionseeker	21	FALSE	NA	NA
K562|GNB1L--RPL7A	K562	fusionseeker	21	FALSE	NA	NA
MCF7|PA2G4--LINC00886	MCF7	fusionseeker	21	FALSE	NA	NA
MCF7|RBFOX2--AC006386.1	MCF7	fusionseeker	21	FALSE	NA	NA
MCF7|RP11-511B23.2--HERC2	MCF7	fusionseeker	21	FALSE	NA	NA
MCF7|RPL6--EPHA5	MCF7	fusionseeker	21	FALSE	NA	NA
MCF7|STX3--FABP5	MCF7	fusionseeker	21	FALSE	NA	NA
K562|ABL1--BCR	K562	fusionseeker	20	TRUE	starF,arriba	starF,arriba
MCF7|RGS17--TBL1XR1	MCF7	fusionseeker	20	TRUE	starF,arriba	NA
A549|AC018890.6--MGST2	A549	fusionseeker	20	FALSE	NA	NA
A549|SBF2--DNAJC25-GNG10	A549	fusionseeker	20	FALSE	NA	NA
A549|STX3--FABP5	A549	fusionseeker	20	FALSE	NA	NA
A549|UBE2Q2P2--RPL9	A549	fusionseeker	20	FALSE	NA	NA
K562|CFAP46--KCP	K562	fusionseeker	20	FALSE	NA	NA
K562|NPM1--CLVS1	K562	fusionseeker	20	FALSE	NA	NA
K562|RP11-968A15.8--FAM126B	K562	fusionseeker	20	FALSE	NA	NA
MCF7|DNM1L--NAP1L1	MCF7	fusionseeker	20	FALSE	NA	NA
MCF7|FAM133DP--ZSWIM6	MCF7	fusionseeker	20	FALSE	NA	NA
MCF7|HMGB1--TPST2	MCF7	fusionseeker	20	FALSE	NA	NA
MCF7|HSPD1--CDH12	MCF7	fusionseeker	20	FALSE	NA	NA
MCF7|NSF--RPS7	MCF7	fusionseeker	20	FALSE	NA	NA
MCF7|PDS5A--PABPC1	MCF7	fusionseeker	20	FALSE	NA	NA
MCF7|RPS10--RP11-274B21.1	MCF7	fusionseeker	20	FALSE	NA	NA
MCF7|RPS7P10--RP11-192H23.4	MCF7	fusionseeker	20	FALSE	NA	NA
MCF7|SENP1--KCP	MCF7	fusionseeker	20	FALSE	NA	NA
MCF7|TMEM131--HMGN1	MCF7	fusionseeker	20	FALSE	NA	NA
A549|AUTS2--PTPRN2	A549	fusionseeker	19	FALSE	NA	NA
A549|BCL2L14--PTMA	A549	fusionseeker	19	FALSE	NA	NA
A549|NPM1--CLVS1	A549	fusionseeker	19	FALSE	NA	NA
A549|SEMA6D--RPL7A	A549	fusionseeker	19	FALSE	NA	NA
A549|TAGLN2--OXR1	A549	fusionseeker	19	FALSE	NA	NA
A549|TAOK3--AC004448.5	A549	fusionseeker	19	FALSE	NA	NA
K562|AMBRA1--RP11-274B21.1	K562	fusionseeker	19	FALSE	NA	NA
K562|DAB1--ANK2	K562	fusionseeker	19	FALSE	NA	NA
K562|PIGK--THSD4	K562	fusionseeker	19	FALSE	NA	NA
K562|PLEKHA7--RPL36A	K562	fusionseeker	19	FALSE	NA	NA
K562|PSMA8--DHFR	K562	fusionseeker	19	FALSE	NA	NA
MCF7|SVIL--KIF2A	MCF7	fusionseeker	19	FALSE	NA	NA
MCF7|ENSA--RP11-406A9.2	MCF7	fusionseeker	19	FALSE	NA	NA
MCF7|RP11-968A15.8--HNRNPA1L2	MCF7	fusionseeker	19	FALSE	NA	NA
MCF7|RPSAP54--RP11-255H23.2	MCF7	fusionseeker	19	FALSE	NA	NA
MCF7|TTC7B--RPS18	MCF7	fusionseeker	19	FALSE	NA	NA
A549|CFAP46--PTPRN2	A549	fusionseeker	18	FALSE	NA	NA
A549|KMT2D--TPRXL	A549	fusionseeker	18	FALSE	NA	NA
A549|TPRXL--PAXIP1	A549	fusionseeker	18	FALSE	NA	NA
A549|ZNF286A--UBE2S	A549	fusionseeker	18	FALSE	NA	NA
K562|FAM19A5--AUTS2	K562	fusionseeker	18	FALSE	NA	NA
K562|FAM19A5--PTPRN2	K562	fusionseeker	18	FALSE	NA	NA
K562|GRM4--PARP4P1	K562	fusionseeker	18	FALSE	NA	NA
K562|HERC2--IL6ST	K562	fusionseeker	18	FALSE	NA	NA
K562|LYPD8--AC006372.4	K562	fusionseeker	18	FALSE	NA	NA
K562|LYPD8--MLXIP	K562	fusionseeker	18	FALSE	NA	NA
K562|RPS3--EIF2B5	K562	fusionseeker	18	FALSE	NA	NA
K562|SRP9--TNKS2	K562	fusionseeker	18	FALSE	NA	NA
MCF7|COPA--SUMO1	MCF7	fusionseeker	18	FALSE	NA	NA
MCF7|DAB1--ANK2	MCF7	fusionseeker	18	FALSE	NA	NA
MCF7|DTL--RP11-572P18.1	MCF7	fusionseeker	18	FALSE	NA	NA
MCF7|NKIRAS1--CORIN	MCF7	fusionseeker	18	FALSE	NA	NA
MCF7|PGAM1--GLT8D2	MCF7	fusionseeker	18	FALSE	NA	NA
MCF7|FCHO1--MYO9B	MCF7	fusionseeker	17	TRUE	starF,arriba	NA
MCF7|BMP7--SULF2	MCF7	fusionseeker	17	FALSE	arriba	NA
A549|CMIP--PTPRN2	A549	fusionseeker	17	FALSE	NA	NA
A549|GPN3--RPL31	A549	fusionseeker	17	FALSE	NA	NA
A549|HMGN2--TJP1	A549	fusionseeker	17	FALSE	NA	NA
A549|PRH1--RP11-785H5.1	A549	fusionseeker	17	FALSE	NA	NA
A549|RP11-848P1.9--IL6ST	A549	fusionseeker	17	FALSE	NA	NA
A549|RP11-968A15.8--FAM126B	A549	fusionseeker	17	FALSE	NA	NA
K562|CH507-513H4.1--FP236383.3	K562	fusionseeker	17	FALSE	NA	NA
K562|FTH1--RSF1	K562	fusionseeker	17	FALSE	NA	NA
K562|HBG1--TSPAN9	K562	fusionseeker	17	FALSE	NA	NA
K562|HNRNPC--C2orf88	K562	fusionseeker	17	FALSE	NA	NA
K562|RP11-170M17.1--RPL7A	K562	fusionseeker	17	FALSE	NA	NA
K562|RPS10--RP11-274B21.1	K562	fusionseeker	17	FALSE	NA	NA
K562|WDR47--THSD4	K562	fusionseeker	17	FALSE	NA	NA
MCF7|ANK2--PTPRD	MCF7	fusionseeker	17	FALSE	NA	NA
MCF7|RBFOX2--AC012005.3	MCF7	fusionseeker	17	FALSE	NA	NA
MCF7|C14orf39--RBM8A	MCF7	fusionseeker	17	FALSE	NA	NA
MCF7|RPL9--APOO	MCF7	fusionseeker	17	FALSE	NA	NA
MCF7|SENP3-EIF4A1--PCDH11X	MCF7	fusionseeker	17	FALSE	NA	NA
MCF7|SLC2A4RG--ZBTB46	MCF7	fusionseeker	17	FALSE	NA	NA
MCF7|EIF4E2--GIGYF2	MCF7	fusionseeker	16	FALSE	starF,arriba	NA
A549|CMIP--KCP	A549	fusionseeker	16	FALSE	NA	NA
A549|CSF1R--RPL7	A549	fusionseeker	16	FALSE	NA	NA
A549|EIF3CL--RP11-57A19.4	A549	fusionseeker	16	FALSE	NA	NA
A549|FTH1--RAB7A	A549	fusionseeker	16	FALSE	NA	NA
A549|HERC2--RBFOX2	A549	fusionseeker	16	FALSE	NA	NA
A549|HMGB1--TPST2	A549	fusionseeker	16	FALSE	NA	NA
A549|RPS26P8--ANK2	A549	fusionseeker	16	FALSE	NA	NA
K562|AC004448.5--RPS2P55	K562	fusionseeker	16	FALSE	NA	NA
K562|EIF3A--PCYOX1	K562	fusionseeker	16	FALSE	NA	NA
K562|GGACT--ANK2	K562	fusionseeker	16	FALSE	NA	NA
K562|RP11-159F24.3--EEF1A1	K562	fusionseeker	16	FALSE	NA	NA
K562|RP11-848P1.9--IL6ST	K562	fusionseeker	16	FALSE	NA	NA
K562|RPS12--RP1-292B18.4	K562	fusionseeker	16	FALSE	NA	NA
K562|THSD4--HMGB1P5	K562	fusionseeker	16	FALSE	NA	NA
K562|TTC7B--RPS18	K562	fusionseeker	16	FALSE	NA	NA
MCF7|ANK2--RPS26P6	MCF7	fusionseeker	16	FALSE	NA	NA
MCF7|FAM65B--PPIA	MCF7	fusionseeker	16	FALSE	NA	NA
MCF7|FRMD5--ACTB	MCF7	fusionseeker	16	FALSE	NA	NA
MCF7|PCNXL2--RPS7	MCF7	fusionseeker	16	FALSE	NA	NA
MCF7|IFT52--PHTF1	MCF7	fusionseeker	16	FALSE	NA	NA
MCF7|SLC25A23--RP11-384F7.1	MCF7	fusionseeker	16	FALSE	NA	NA
MCF7|TMEM183A--PFN2	MCF7	fusionseeker	16	FALSE	NA	NA
MCF7|ZNF44--RPL28	MCF7	fusionseeker	16	FALSE	NA	NA
MCF7|LINC01588--NEMF	MCF7	fusionseeker	15	FALSE	starF,arriba	NA
A549|BEST1--FTH1P10	A549	fusionseeker	15	FALSE	NA	NA
A549|CMIP--AUTS2	A549	fusionseeker	15	FALSE	NA	NA
A549|GOLGA3--RPS11	A549	fusionseeker	15	FALSE	NA	NA
A549|LYPD8--FAM19A5	A549	fusionseeker	15	FALSE	NA	NA
A549|COMMD1--RPSAP58	A549	fusionseeker	15	FALSE	NA	NA
A549|RP11-255H23.2--RPSAP15	A549	fusionseeker	15	FALSE	NA	NA
A549|RP11-887P2.3--GLT8D2	A549	fusionseeker	15	FALSE	NA	NA
A549|RPL7P9--PNPLA8	A549	fusionseeker	15	FALSE	NA	NA
A549|RPS3--EIF2B5	A549	fusionseeker	15	FALSE	NA	NA
A549|TECR--AFF1	A549	fusionseeker	15	FALSE	NA	NA
A549|YWHAQ--EFCAB6	A549	fusionseeker	15	FALSE	NA	NA
A549|ZNF286A--RPL28	A549	fusionseeker	15	FALSE	NA	NA
K562|ANK2--PTPRD	K562	fusionseeker	15	FALSE	NA	NA
K562|EEF1A1P13--STEAP1B	K562	fusionseeker	15	FALSE	NA	NA
K562|EIF3CL--RP11-57A19.4	K562	fusionseeker	15	FALSE	NA	NA
K562|GOLGA4--TCEA1	K562	fusionseeker	15	FALSE	NA	NA
K562|HBG2--TSPAN9	K562	fusionseeker	15	FALSE	NA	NA
K562|HBG1--FTL	K562	fusionseeker	15	FALSE	NA	NA
K562|HBG1--RPS12	K562	fusionseeker	15	FALSE	NA	NA
K562|PA2G4--LINC00886	K562	fusionseeker	15	FALSE	NA	NA
K562|PPP1R14B--ELF2	K562	fusionseeker	15	FALSE	NA	NA
K562|RP11-255H23.2--RPSAP15	K562	fusionseeker	15	FALSE	NA	NA
K562|RP11-968A15.8--HNRNPA1L2	K562	fusionseeker	15	FALSE	NA	NA
K562|RPS15A--LEPROTL1	K562	fusionseeker	15	FALSE	NA	NA
K562|RPS2--XPO5	K562	fusionseeker	15	FALSE	NA	NA
K562|TAOK3--RPS2P55	K562	fusionseeker	15	FALSE	NA	NA
MCF7|BEST1--FTH1P10	MCF7	fusionseeker	15	FALSE	NA	NA
MCF7|MINOS1--RPS14	MCF7	fusionseeker	15	FALSE	NA	NA
MCF7|MMP23B--NADK	MCF7	fusionseeker	15	FALSE	NA	NA
MCF7|RAB3GAP2--MORF4L1	MCF7	fusionseeker	15	FALSE	NA	NA
MCF7|RP11-159F24.3--EEF1A1P5	MCF7	fusionseeker	15	FALSE	NA	NA
MCF7|RP11-331N16.1--RBFOX2	MCF7	fusionseeker	15	FALSE	NA	NA
MCF7|RPL41--RP11-848P1.9	MCF7	fusionseeker	15	FALSE	NA	NA
MCF7|RPS26P8--ANK2	MCF7	fusionseeker	15	FALSE	NA	NA
MCF7|TAOK3--RPS2P55	MCF7	fusionseeker	15	FALSE	NA	NA
A549|ACACA--PLXDC1	A549	fusionseeker	14	FALSE	starF,arriba	NA
MCF7|GBF1--MACROD2	MCF7	fusionseeker	14	FALSE	starF,arriba	NA
A549|ANK2--RPS26P11	A549	fusionseeker	14	FALSE	NA	NA
A549|CFAP46--GAL3ST2	A549	fusionseeker	14	FALSE	NA	NA
A549|FAM35DP--RHEB	A549	fusionseeker	14	FALSE	NA	NA
A549|FAM65B--PPIA	A549	fusionseeker	14	FALSE	NA	NA
A549|GOLGA4--TCEA1	A549	fusionseeker	14	FALSE	NA	NA
A549|GRM4--PARP4P1	A549	fusionseeker	14	FALSE	NA	NA
A549|HSPD1--CDH12	A549	fusionseeker	14	FALSE	NA	NA
A549|OLA1--NDUFA6-AS1	A549	fusionseeker	14	FALSE	NA	NA
A549|SERBP1--FRAS1	A549	fusionseeker	14	FALSE	NA	NA
A549|SNX6--RPS19	A549	fusionseeker	14	FALSE	NA	NA
A549|WDR47--THSD4	A549	fusionseeker	14	FALSE	NA	NA
K562|ANK2--RPS26P6	K562	fusionseeker	14	FALSE	NA	NA
K562|GPN3--RPL31	K562	fusionseeker	14	FALSE	NA	NA
K562|HSPD1--CDH12	K562	fusionseeker	14	FALSE	NA	NA
K562|NSF--RPS7	K562	fusionseeker	14	FALSE	NA	NA
K562|RP11-179A16.1--ARMC9	K562	fusionseeker	14	FALSE	NA	NA
MCF7|AC019129.2--PABPC1	MCF7	fusionseeker	14	FALSE	NA	NA
MCF7|CPEB3--NHP2	MCF7	fusionseeker	14	FALSE	NA	NA
MCF7|CSF1R--RPL7	MCF7	fusionseeker	14	FALSE	NA	NA
MCF7|FAM35DP--RHEB	MCF7	fusionseeker	14	FALSE	NA	NA
MCF7|GAS5--MDN1	MCF7	fusionseeker	14	FALSE	NA	NA
MCF7|H3F3A--MGST2	MCF7	fusionseeker	14	FALSE	NA	NA
MCF7|OLA1--NDUFA6-AS1	MCF7	fusionseeker	14	FALSE	NA	NA
MCF7|PPIAP22--FAM65B	MCF7	fusionseeker	14	FALSE	NA	NA
MCF7|RP11-887P2.3--GLT8D2	MCF7	fusionseeker	14	FALSE	NA	NA
MCF7|RPS2--GAB1	MCF7	fusionseeker	14	FALSE	NA	NA
MCF7|SMOC1--SEMA6D	MCF7	fusionseeker	14	FALSE	NA	NA
MCF7|TBCA--DMD	MCF7	fusionseeker	14	FALSE	NA	NA
A549|ATG10--PPIA	A549	fusionseeker	13	FALSE	NA	NA
A549|CFAP46--AC006372.4	A549	fusionseeker	13	FALSE	NA	NA
A549|DCAF6--RP11-303E16.8	A549	fusionseeker	13	FALSE	NA	NA
A549|DLEU1--ST13	A549	fusionseeker	13	FALSE	NA	NA
A549|KRT18--PCDH11Y	A549	fusionseeker	13	FALSE	NA	NA
A549|KRT8--CEP120	A549	fusionseeker	13	FALSE	NA	NA
A549|NSF--RPS7	A549	fusionseeker	13	FALSE	NA	NA
A549|RP11-603J24.9--LINC00886	A549	fusionseeker	13	FALSE	NA	NA
A549|PCOLCE2--RPL8	A549	fusionseeker	13	FALSE	NA	NA
A549|PSMA8--DHFR	A549	fusionseeker	13	FALSE	NA	NA
A549|RP11-1029J19.5--RP11-849F2.5	A549	fusionseeker	13	FALSE	NA	NA
A549|RP11-511B23.2--HERC2	A549	fusionseeker	13	FALSE	NA	NA
A549|RP11-756P10.6--MTRF1L	A549	fusionseeker	13	FALSE	NA	NA
A549|RP11-849F2.5--RPL26P19	A549	fusionseeker	13	FALSE	NA	NA
A549|RPL41P1--DGKI	A549	fusionseeker	13	FALSE	NA	NA
A549|RPS15A--LEPROTL1	A549	fusionseeker	13	FALSE	NA	NA
A549|SENP3-EIF4A1--PCDH11X	A549	fusionseeker	13	FALSE	NA	NA
A549|SRP9--TNKS2	A549	fusionseeker	13	FALSE	NA	NA
A549|ZNF44--RPL28	A549	fusionseeker	13	FALSE	NA	NA
K562|BEST1--FTH1P10	K562	fusionseeker	13	FALSE	NA	NA
K562|COL23A1--GRM4	K562	fusionseeker	13	FALSE	NA	NA
K562|CPEB3--RMND5B	K562	fusionseeker	13	FALSE	NA	NA
K562|FTH1--CH507-513H4.1	K562	fusionseeker	13	FALSE	NA	NA
K562|HBG1--MALAT1	K562	fusionseeker	13	FALSE	NA	NA
K562|HBG1--RPS23	K562	fusionseeker	13	FALSE	NA	NA
K562|RP11-159F24.3--EEF1A1P5	K562	fusionseeker	13	FALSE	NA	NA
K562|RP11-255H23.2--RPSAP9	K562	fusionseeker	13	FALSE	NA	NA
K562|RPL13AP5--HBG1	K562	fusionseeker	13	FALSE	NA	NA
K562|RPL41P1--DGKI	K562	fusionseeker	13	FALSE	NA	NA
K562|RPL5--SNRPN	K562	fusionseeker	13	FALSE	NA	NA
K562|RPS27--PPP1R12B	K562	fusionseeker	13	FALSE	NA	NA
K562|RPS3--SSR1	K562	fusionseeker	13	FALSE	NA	NA
K562|RPS3A--JMY	K562	fusionseeker	13	FALSE	NA	NA
K562|ZNF286A--UBE2S	K562	fusionseeker	13	FALSE	NA	NA
MCF7|RPL41--HERC2	MCF7	fusionseeker	13	FALSE	NA	NA
MCF7|HNRNPA1P48--ZNF833P	MCF7	fusionseeker	13	FALSE	NA	NA
MCF7|KRT19--EEF1A1	MCF7	fusionseeker	13	FALSE	NA	NA
MCF7|RPL10A--RP11-1134I14.2	MCF7	fusionseeker	13	FALSE	NA	NA
MCF7|RPL13--ACTB	MCF7	fusionseeker	13	FALSE	NA	NA
MCF7|SNRPE--KDM4C	MCF7	fusionseeker	13	FALSE	NA	NA
MCF7|AFF4--HSPA4	MCF7	fusionseeker	12	FALSE	arriba	NA
MCF7|PDE8A--SCAND2P	MCF7	fusionseeker	12	FALSE	starF,arriba	NA
MCF7|EMCN--SMARCC1	MCF7	fusionseeker	12	FALSE	starF,arriba	NA
A549|A2MP1--PTMA	A549	fusionseeker	12	FALSE	NA	NA
A549|ANK2--RPS26P6	A549	fusionseeker	12	FALSE	NA	NA
A549|BEST1--FTH1P7	A549	fusionseeker	12	FALSE	NA	NA
A549|CKS1B--KIF2A	A549	fusionseeker	12	FALSE	NA	NA
A549|SVIL--KIF2A	A549	fusionseeker	12	FALSE	NA	NA
A549|COL23A1--GRM4	A549	fusionseeker	12	FALSE	NA	NA
A549|EIF3A--PCYOX1	A549	fusionseeker	12	FALSE	NA	NA
A549|GRM4--KCP	A549	fusionseeker	12	FALSE	NA	NA
A549|HMGN2--SV2C	A549	fusionseeker	12	FALSE	NA	NA
A549|JAKMIP3--CFAP46	A549	fusionseeker	12	FALSE	NA	NA
A549|LYPD8--AC006372.4	A549	fusionseeker	12	FALSE	NA	NA
A549|LYPD8--CFAP46	A549	fusionseeker	12	FALSE	NA	NA
A549|LYPD8--MLXIP	A549	fusionseeker	12	FALSE	NA	NA
A549|MLH1--RPL29	A549	fusionseeker	12	FALSE	NA	NA
A549|PTMAP5--DTWD2	A549	fusionseeker	12	FALSE	NA	NA
A549|RP11-192H23.4--NSF	A549	fusionseeker	12	FALSE	NA	NA
A549|RP11-337C18.8--PDIA3	A549	fusionseeker	12	FALSE	NA	NA
A549|RPL7P9--WDR41	A549	fusionseeker	12	FALSE	NA	NA
A549|TSPAN9--RP11-761N21.2	A549	fusionseeker	12	FALSE	NA	NA
K562|CKS1B--KIF2A	K562	fusionseeker	12	FALSE	NA	NA
K562|DTL--RP11-572P18.1	K562	fusionseeker	12	FALSE	NA	NA
K562|HBG1--RPL15P3	K562	fusionseeker	12	FALSE	NA	NA
K562|LYPD8--PTPRN2	K562	fusionseeker	12	FALSE	NA	NA
K562|MED15--RPL14	K562	fusionseeker	12	FALSE	NA	NA
K562|MINOS1--RPS14	K562	fusionseeker	12	FALSE	NA	NA
K562|OLA1--NDUFA6-AS1	K562	fusionseeker	12	FALSE	NA	NA
K562|RPL7P9--WDR41	K562	fusionseeker	12	FALSE	NA	NA
K562|RPLP2--HBG1	K562	fusionseeker	12	FALSE	NA	NA
K562|RPS27--TSPAN9	K562	fusionseeker	12	FALSE	NA	NA
K562|RPS3AP6--JMY	K562	fusionseeker	12	FALSE	NA	NA
K562|SERBP1--FRAS1	K562	fusionseeker	12	FALSE	NA	NA
K562|TBCA--DMD	K562	fusionseeker	12	FALSE	NA	NA
K562|TECR--AFF1	K562	fusionseeker	12	FALSE	NA	NA
K562|ZNF286A--RPL28	K562	fusionseeker	12	FALSE	NA	NA
MCF7|A2MP1--DTWD2	MCF7	fusionseeker	12	FALSE	NA	NA
MCF7|AC007405.4--RALY	MCF7	fusionseeker	12	FALSE	NA	NA
MCF7|AC016995.3--CTB-63M22.1	MCF7	fusionseeker	12	FALSE	NA	NA
MCF7|ERP29--ZFP64	MCF7	fusionseeker	12	FALSE	NA	NA
MCF7|BEST1--RSF1	MCF7	fusionseeker	12	FALSE	NA	NA
MCF7|PSMA8--DHFR	MCF7	fusionseeker	12	FALSE	NA	NA
MCF7|RP11-1029J19.5--RP11-849F2.5	MCF7	fusionseeker	12	FALSE	NA	NA
MCF7|RP11-382A20.5--RPS6KA2	MCF7	fusionseeker	12	FALSE	NA	NA
MCF7|HERC2--DGKI	MCF7	fusionseeker	12	FALSE	NA	NA
MCF7|RPS19--EEF1A1	MCF7	fusionseeker	12	FALSE	NA	NA
MCF7|WDPCP--MXD3	MCF7	fusionseeker	12	FALSE	NA	NA
MCF7|LPPR5--RP11-15E18.1	MCF7	fusionseeker	11	FALSE	starF	NA
A549|A2MP1--DTWD2	A549	fusionseeker	11	FALSE	NA	NA
A549|BZW1--LSAMP	A549	fusionseeker	11	FALSE	NA	NA
A549|CFAP46--GRM4	A549	fusionseeker	11	FALSE	NA	NA
A549|BEST1--GXYLT2	A549	fusionseeker	11	FALSE	NA	NA
A549|KRT7--FTL	A549	fusionseeker	11	FALSE	NA	NA
A549|LSM12--UNC5D	A549	fusionseeker	11	FALSE	NA	NA
A549|PIGK--THSD4	A549	fusionseeker	11	FALSE	NA	NA
A549|PPP1R14B--ELF2	A549	fusionseeker	11	FALSE	NA	NA
A549|RP11-968A15.8--HNRNPA1L2	A549	fusionseeker	11	FALSE	NA	NA
A549|RP11-848P1.9--DGKI	A549	fusionseeker	11	FALSE	NA	NA
A549|RPL6P27--DGKI	A549	fusionseeker	11	FALSE	NA	NA
A549|RPLP2--SLC35F2	A549	fusionseeker	11	FALSE	NA	NA
A549|RPSAP54--RP11-255H23.2	A549	fusionseeker	11	FALSE	NA	NA
A549|SEPT11--TXN	A549	fusionseeker	11	FALSE	NA	NA
A549|TBCA--DMD	A549	fusionseeker	11	FALSE	NA	NA
A549|TXNRD1--AC079250.1	A549	fusionseeker	11	FALSE	NA	NA
A549|WDPCP--MXD3	A549	fusionseeker	11	FALSE	NA	NA
K562|EEF1A1P11--STEAP1B	K562	fusionseeker	11	FALSE	NA	NA
K562|EIF1--CH507-513H4.1	K562	fusionseeker	11	FALSE	NA	NA
K562|HBG1--RPS18	K562	fusionseeker	11	FALSE	NA	NA
K562|HSP90B1--LRRC28	K562	fusionseeker	11	FALSE	NA	NA
K562|KRT8--ASPH	K562	fusionseeker	11	FALSE	NA	NA
K562|LHFPL3--EIF4BP7	K562	fusionseeker	11	FALSE	NA	NA
K562|PGAM1--GLT8D2	K562	fusionseeker	11	FALSE	NA	NA
K562|RAB3GAP2--MORF4L1	K562	fusionseeker	11	FALSE	NA	NA
K562|RP11-331N16.1--RBFOX2	K562	fusionseeker	11	FALSE	NA	NA
K562|RPLP1--STAG2	K562	fusionseeker	11	FALSE	NA	NA
K562|RPS26P8--ANK2	K562	fusionseeker	11	FALSE	NA	NA
K562|ZMYM4--RPL5	K562	fusionseeker	11	FALSE	NA	NA
MCF7|AC004448.5--XPO5	MCF7	fusionseeker	11	FALSE	NA	NA
MCF7|FTH1--SCHLAP1	MCF7	fusionseeker	11	FALSE	NA	NA
MCF7|CAND2--MTHFD1L	MCF7	fusionseeker	11	FALSE	NA	NA
MCF7|CD81-AS1--RPL26L1	MCF7	fusionseeker	11	FALSE	NA	NA
MCF7|CDC14A--BCAS2	MCF7	fusionseeker	11	FALSE	NA	NA
MCF7|DLEU1--ST13	MCF7	fusionseeker	11	FALSE	NA	NA
MCF7|EIF3A--PCYOX1	MCF7	fusionseeker	11	FALSE	NA	NA
MCF7|INO80B-WBP1--RGPD1	MCF7	fusionseeker	11	FALSE	NA	NA
MCF7|LSM12--UNC5D	MCF7	fusionseeker	11	FALSE	NA	NA
MCF7|MFSD2A--RPS2	MCF7	fusionseeker	11	FALSE	NA	NA
MCF7|RAP1B--SV2C	MCF7	fusionseeker	11	FALSE	NA	NA
MCF7|RP11-179A16.1--ARMC9	MCF7	fusionseeker	11	FALSE	NA	NA
MCF7|TAGLN2--OXR1	MCF7	fusionseeker	11	FALSE	NA	NA
MCF7|TMEM222--ACTG1	MCF7	fusionseeker	11	FALSE	NA	NA
MCF7|TRIP11--PTMA	MCF7	fusionseeker	11	FALSE	NA	NA
A549|AF127936.9--NRIP1	A549	fusionseeker	10	FALSE	NA	NA
A549|AMBRA1--RP11-274B21.1	A549	fusionseeker	10	FALSE	NA	NA
A549|CAND2--MTHFD1L	A549	fusionseeker	10	FALSE	NA	NA
A549|CCDC30--TMSB4X	A549	fusionseeker	10	FALSE	NA	NA
A549|CCSER1--SLC27A4	A549	fusionseeker	10	FALSE	NA	NA
A549|DTL--RP11-572P18.1	A549	fusionseeker	10	FALSE	NA	NA
A549|FAM19A5--AUTS2	A549	fusionseeker	10	FALSE	NA	NA
A549|HSF2BP--PTPRN2	A549	fusionseeker	10	FALSE	NA	NA
A549|KRT86--RPS18	A549	fusionseeker	10	FALSE	NA	NA
A549|MINOS1--RPS14	A549	fusionseeker	10	FALSE	NA	NA
A549|MLXIP--FAM19A5	A549	fusionseeker	10	FALSE	NA	NA
A549|PCNXL2--RPS7	A549	fusionseeker	10	FALSE	NA	NA
A549|PSMA6--UTY	A549	fusionseeker	10	FALSE	NA	NA
A549|RP11-254B13.1--RP11-255H23.2	A549	fusionseeker	10	FALSE	NA	NA
K562|AC072062.1--CTC-575D19.1	K562	fusionseeker	10	FALSE	NA	NA
K562|BANF1--CAB39	K562	fusionseeker	10	FALSE	NA	NA
K562|BDNF-AS--RPS25	K562	fusionseeker	10	FALSE	NA	NA
K562|BZW1--LSAMP	K562	fusionseeker	10	FALSE	NA	NA
K562|CAND2--MTHFD1L	K562	fusionseeker	10	FALSE	NA	NA
K562|SVIL--KIF2A	K562	fusionseeker	10	FALSE	NA	NA
K562|CSF1R--RPL7	K562	fusionseeker	10	FALSE	NA	NA
K562|EIF4B--LHFPL3	K562	fusionseeker	10	FALSE	NA	NA
K562|EPB42--RPS3AP6	K562	fusionseeker	10	FALSE	NA	NA
K562|FAM174B--HMGN1	K562	fusionseeker	10	FALSE	NA	NA
K562|BEST1--CH507-528H12.1	K562	fusionseeker	10	FALSE	NA	NA
K562|FTH1--RAB7A	K562	fusionseeker	10	FALSE	NA	NA
K562|HBG1--IQCG	K562	fusionseeker	10	FALSE	NA	NA
K562|HBG1--RPL31	K562	fusionseeker	10	FALSE	NA	NA
K562|HBG1--RPL37A	K562	fusionseeker	10	FALSE	NA	NA
K562|HBG1--TXNRD1	K562	fusionseeker	10	FALSE	NA	NA
K562|HSF2BP--PTPRN2	K562	fusionseeker	10	FALSE	NA	NA
K562|PCOLCE2--RPL8	K562	fusionseeker	10	FALSE	NA	NA
K562|POLQ--RPL7A	K562	fusionseeker	10	FALSE	NA	NA
K562|RP11-81K2.1--EIF4E	K562	fusionseeker	10	FALSE	NA	NA
K562|RPL13AP5--HBG2	K562	fusionseeker	10	FALSE	NA	NA
K562|RPL6P27--DGKI	K562	fusionseeker	10	FALSE	NA	NA
K562|RPS18P12--PCNP	K562	fusionseeker	10	FALSE	NA	NA
K562|RPS5--DSE	K562	fusionseeker	10	FALSE	NA	NA
K562|RPS8--HBG1	K562	fusionseeker	10	FALSE	NA	NA
K562|SNX6--RPS19	K562	fusionseeker	10	FALSE	NA	NA
MCF7|AEBP2--EEF1A1	MCF7	fusionseeker	10	FALSE	NA	NA
MCF7|ANK2--RPS26P11	MCF7	fusionseeker	10	FALSE	NA	NA
MCF7|ARMC2--PTCD1	MCF7	fusionseeker	10	FALSE	NA	NA
MCF7|CTC-575D19.1--ASTN2	MCF7	fusionseeker	10	FALSE	NA	NA
MCF7|EEF1A1P9--STEAP1B	MCF7	fusionseeker	10	FALSE	NA	NA
MCF7|EIF1--RPL35	MCF7	fusionseeker	10	FALSE	NA	NA
MCF7|EIF5--SHROOM2	MCF7	fusionseeker	10	FALSE	NA	NA
MCF7|KRT8--CEP120	MCF7	fusionseeker	10	FALSE	NA	NA
MCF7|NUCKS1--CTD-2090I13.1	MCF7	fusionseeker	10	FALSE	NA	NA
MCF7|PPAP2B--RPS2	MCF7	fusionseeker	10	FALSE	NA	NA
MCF7|RAB1B--RP11-613M10.9	MCF7	fusionseeker	10	FALSE	NA	NA
MCF7|RP11-159F24.3--STEAP1B	MCF7	fusionseeker	10	FALSE	NA	NA
MCF7|RP11-189B4.7--COX17	MCF7	fusionseeker	10	FALSE	NA	NA
MCF7|RP11-331N16.1--IL6ST	MCF7	fusionseeker	10	FALSE	NA	NA
MCF7|RP11-331N16.1--RP11-511B23.2	MCF7	fusionseeker	10	FALSE	NA	NA
MCF7|RP11-350G8.4--RP11-255H23.2	MCF7	fusionseeker	10	FALSE	NA	NA
MCF7|RP11-795H16.3--RPS3A	MCF7	fusionseeker	10	FALSE	NA	NA
MCF7|RPL6--DGKI	MCF7	fusionseeker	10	FALSE	NA	NA
MCF7|RPS3--RBFOX2	MCF7	fusionseeker	10	FALSE	NA	NA
MCF7|RPS4XP2--PIN4	MCF7	fusionseeker	10	FALSE	NA	NA
MCF7|SDHC--RPA1	MCF7	fusionseeker	10	FALSE	NA	NA
MCF7|SMCO4--SRP14	MCF7	fusionseeker	10	FALSE	NA	NA
MCF7|TFF1--RPL8	MCF7	fusionseeker	10	FALSE	NA	NA
MCF7|ZNF286A--RPL28	MCF7	fusionseeker	10	FALSE	NA	NA
MCF7|GCN1L1--MSI1	MCF7	fusionseeker	9	TRUE	starF	NA
A549|AC004448.5--RPS2P55	A549	fusionseeker	9	FALSE	NA	NA
A549|AC007405.4--RALY	A549	fusionseeker	9	FALSE	NA	NA
A549|AUTS2--KCP	A549	fusionseeker	9	FALSE	NA	NA
A549|BCAS4--CCSER1	A549	fusionseeker	9	FALSE	NA	NA
A549|CD81-AS1--RPL26L1	A549	fusionseeker	9	FALSE	NA	NA
A549|CFAP46--PRDM15	A549	fusionseeker	9	FALSE	NA	NA
A549|COMMD1--RPSA	A549	fusionseeker	9	FALSE	NA	NA
A549|HSF2BP--AUTS2	A549	fusionseeker	9	FALSE	NA	NA
A549|LDHA--CFL1	A549	fusionseeker	9	FALSE	NA	NA
A549|MARCH1--HSPA5	A549	fusionseeker	9	FALSE	NA	NA
A549|NEGR1--GDI2	A549	fusionseeker	9	FALSE	NA	NA
A549|PLEKHA7--RPL36A	A549	fusionseeker	9	FALSE	NA	NA
A549|PPIAP22--FAM65B	A549	fusionseeker	9	FALSE	NA	NA
A549|RAB3GAP2--MORF4L1	A549	fusionseeker	9	FALSE	NA	NA
A549|RP11-672A2.1--FAIM2	A549	fusionseeker	9	FALSE	NA	NA
A549|RPS2--XPO5	A549	fusionseeker	9	FALSE	NA	NA
A549|RPS3--SSR1	A549	fusionseeker	9	FALSE	NA	NA
A549|RPS3A--JMY	A549	fusionseeker	9	FALSE	NA	NA
K562|AC018890.6--RP11-349N19.2	K562	fusionseeker	9	FALSE	NA	NA
K562|BEST1--FTH1P8	K562	fusionseeker	9	FALSE	NA	NA
K562|DLEU1--ST13	K562	fusionseeker	9	FALSE	NA	NA
K562|ELSPBP1--SORBS2	K562	fusionseeker	9	FALSE	NA	NA
K562|FTH1--GXYLT2	K562	fusionseeker	9	FALSE	NA	NA
K562|GAS5--MDN1	K562	fusionseeker	9	FALSE	NA	NA
K562|HBG1--FAU	K562	fusionseeker	9	FALSE	NA	NA
K562|HBG1--OOEP	K562	fusionseeker	9	FALSE	NA	NA
K562|HBG2--RBFOX2	K562	fusionseeker	9	FALSE	NA	NA
K562|HBG1--RP11-179A16.1	K562	fusionseeker	9	FALSE	NA	NA
K562|HBG1--RPL27A	K562	fusionseeker	9	FALSE	NA	NA
K562|HBG1--RPL37	K562	fusionseeker	9	FALSE	NA	NA
K562|HBG1--RPL6P27	K562	fusionseeker	9	FALSE	NA	NA
K562|HBG1--RPLP1	K562	fusionseeker	9	FALSE	NA	NA
K562|HBG1--RPS23P8	K562	fusionseeker	9	FALSE	NA	NA
K562|HNRNPA1P48--ZNF833P	K562	fusionseeker	9	FALSE	NA	NA
K562|LHFPL3--EIF4BP3	K562	fusionseeker	9	FALSE	NA	NA
K562|LYPD8--FAM19A5	K562	fusionseeker	9	FALSE	NA	NA
K562|MLXIP--AC006372.4	K562	fusionseeker	9	FALSE	NA	NA
K562|RAP1B--SV2C	K562	fusionseeker	9	FALSE	NA	NA
K562|RP11-192H23.4--NSF	K562	fusionseeker	9	FALSE	NA	NA
K562|RP11-337C18.8--PDIA3	K562	fusionseeker	9	FALSE	NA	NA
K562|RP11-511B23.2--HERC2	K562	fusionseeker	9	FALSE	NA	NA
K562|RP11-848P1.9--DGKI	K562	fusionseeker	9	FALSE	NA	NA
K562|TAGLN2--OXR1	K562	fusionseeker	9	FALSE	NA	NA
K562|TMA7--NEURL1B	K562	fusionseeker	9	FALSE	NA	NA
K562|WDPCP--MXD3	K562	fusionseeker	9	FALSE	NA	NA
MCF7|AC007405.4--EIF2S2	MCF7	fusionseeker	9	FALSE	NA	NA
MCF7|AC018890.6--RP11-349N19.2	MCF7	fusionseeker	9	FALSE	NA	NA
MCF7|AMBRA1--RP3-375P9.2	MCF7	fusionseeker	9	FALSE	NA	NA
MCF7|AP001347.6--ANKRD20A11P	MCF7	fusionseeker	9	FALSE	NA	NA
MCF7|ATG10--PPIA	MCF7	fusionseeker	9	FALSE	NA	NA
MCF7|RBM6--BCAR1	MCF7	fusionseeker	9	FALSE	NA	NA
MCF7|BCAS3--AC136289.1	MCF7	fusionseeker	9	FALSE	NA	NA
MCF7|BCAS3--RP11-3P17.4	MCF7	fusionseeker	9	FALSE	NA	NA
MCF7|BCL2L14--DTWD2	MCF7	fusionseeker	9	FALSE	NA	NA
MCF7|CDH20--RPL30	MCF7	fusionseeker	9	FALSE	NA	NA
MCF7|EEF1A1--RPL30	MCF7	fusionseeker	9	FALSE	NA	NA
MCF7|EEF1A1P12--STEAP1B	MCF7	fusionseeker	9	FALSE	NA	NA
MCF7|EEF1B2P6--POLA1	MCF7	fusionseeker	9	FALSE	NA	NA
MCF7|FBXL12--CTC-575D19.1	MCF7	fusionseeker	9	FALSE	NA	NA
MCF7|FBXL12--CTD-2192J16.15	MCF7	fusionseeker	9	FALSE	NA	NA
MCF7|GAPDH--RPS15A	MCF7	fusionseeker	9	FALSE	NA	NA
MCF7|GOLGA4--TCEA1	MCF7	fusionseeker	9	FALSE	NA	NA
MCF7|GRB14--EIF3E	MCF7	fusionseeker	9	FALSE	NA	NA
MCF7|HMGN1--MPP1	MCF7	fusionseeker	9	FALSE	NA	NA
MCF7|JMJD1C--TATDN1	MCF7	fusionseeker	9	FALSE	NA	NA
MCF7|KLHDC8A--SNRPG	MCF7	fusionseeker	9	FALSE	NA	NA
MCF7|NCL--RP11-216L13.18	MCF7	fusionseeker	9	FALSE	NA	NA
MCF7|NFE2L1--RABGAP1	MCF7	fusionseeker	9	FALSE	NA	NA
MCF7|POLQ--RPL7A	MCF7	fusionseeker	9	FALSE	NA	NA
MCF7|PUM1--SERINC2	MCF7	fusionseeker	9	FALSE	NA	NA
MCF7|RBFOX2--EEF1A1	MCF7	fusionseeker	9	FALSE	NA	NA
MCF7|RP11-255H23.2--RPSAP9	MCF7	fusionseeker	9	FALSE	NA	NA
MCF7|RP11-337C18.8--PDIA3	MCF7	fusionseeker	9	FALSE	NA	NA
MCF7|RP11-81K2.1--EIF4E	MCF7	fusionseeker	9	FALSE	NA	NA
MCF7|RPL13--EEF1A1	MCF7	fusionseeker	9	FALSE	NA	NA
MCF7|RPL13--PPDPF	MCF7	fusionseeker	9	FALSE	NA	NA
MCF7|RPL37A--RPS6	MCF7	fusionseeker	9	FALSE	NA	NA
MCF7|RPS17--ZNF141	MCF7	fusionseeker	9	FALSE	NA	NA
MCF7|RPS2--INVS	MCF7	fusionseeker	9	FALSE	NA	NA
MCF7|RPS3--FAM19A2	MCF7	fusionseeker	9	FALSE	NA	NA
MCF7|RPS3--RPLP1	MCF7	fusionseeker	9	FALSE	NA	NA
MCF7|RPS3AP6--JMY	MCF7	fusionseeker	9	FALSE	NA	NA
MCF7|SARNP--PTCD1	MCF7	fusionseeker	9	FALSE	NA	NA
MCF7|ELP2--SLC39A6	MCF7	fusionseeker	9	FALSE	NA	NA
MCF7|SNHG16--LINC01492	MCF7	fusionseeker	9	FALSE	NA	NA
MCF7|TPM3--AC010149.4	MCF7	fusionseeker	9	FALSE	NA	NA
MCF7|UQCRFS1--ENTHD1	MCF7	fusionseeker	9	FALSE	NA	NA
MCF7|YBX1--EFCAB10	MCF7	fusionseeker	9	FALSE	NA	NA
MCF7|ZNF702P--ARPC1A	MCF7	fusionseeker	9	FALSE	NA	NA
MCF7|ABCC1--C16orf45	MCF7	fusionseeker	8	TRUE	NA	NA
MCF7|PRICKLE2--SULF2	MCF7	fusionseeker	8	TRUE	starF,arriba	NA
MCF7|TANC2--TLK2	MCF7	fusionseeker	8	FALSE	starF,arriba	NA
A549|ABHD2--VAPA	A549	fusionseeker	8	FALSE	NA	NA
A549|ARMC2--PTCD1	A549	fusionseeker	8	FALSE	NA	NA
A549|BCAS3--RP11-3P17.4	A549	fusionseeker	8	FALSE	NA	NA
A549|EIF1--RPL35	A549	fusionseeker	8	FALSE	NA	NA
A549|ENO1--AKR1C2	A549	fusionseeker	8	FALSE	NA	NA
A549|FAM174B--HMGN1	A549	fusionseeker	8	FALSE	NA	NA
A549|FAM19A5--KCP	A549	fusionseeker	8	FALSE	NA	NA
A549|FAM19A5--PTPRN2	A549	fusionseeker	8	FALSE	NA	NA
A549|FTH1--KRT10	A549	fusionseeker	8	FALSE	NA	NA
A549|GALNT18--CSNK2A1	A549	fusionseeker	8	FALSE	NA	NA
A549|GAPDH--FTL	A549	fusionseeker	8	FALSE	NA	NA
A549|H3F3A--MGST2	A549	fusionseeker	8	FALSE	NA	NA
A549|HNRNPA1P48--ZNF833P	A549	fusionseeker	8	FALSE	NA	NA
A549|LYPD8--NDUFA10	A549	fusionseeker	8	FALSE	NA	NA
A549|MLXIP--AC006372.4	A549	fusionseeker	8	FALSE	NA	NA
A549|PTPRN2--SEMA4D	A549	fusionseeker	8	FALSE	NA	NA
A549|RP11-159F24.3--EEF1A1	A549	fusionseeker	8	FALSE	NA	NA
A549|RP11-331N16.1--IL6ST	A549	fusionseeker	8	FALSE	NA	NA
A549|RP11-331N16.1--RBFOX2	A549	fusionseeker	8	FALSE	NA	NA
A549|RP11-511B23.2--RP11-848P1.9	A549	fusionseeker	8	FALSE	NA	NA
A549|RPL41--RP11-848P1.9	A549	fusionseeker	8	FALSE	NA	NA
A549|RPL9--APOO	A549	fusionseeker	8	FALSE	NA	NA
A549|RPS13--RPL23	A549	fusionseeker	8	FALSE	NA	NA
A549|SENP3-EIF4A1--PCDH11Y	A549	fusionseeker	8	FALSE	NA	NA
A549|SMOC1--RP11-244M2.1	A549	fusionseeker	8	FALSE	NA	NA
A549|SOX6--AKR1B1	A549	fusionseeker	8	FALSE	NA	NA
A549|CCDC51--CTB-79E8.3	A549	fusionseeker	8	FALSE	NA	NA
K562|AC007405.4--EIF2S2	K562	fusionseeker	8	FALSE	NA	NA
K562|BEST1--FTH1P7	K562	fusionseeker	8	FALSE	NA	NA
K562|CTC-575D19.1--ASTN2	K562	fusionseeker	8	FALSE	NA	NA
K562|FAM19A5--AC006372.4	K562	fusionseeker	8	FALSE	NA	NA
K562|GGACT--GS1-184P14.2	K562	fusionseeker	8	FALSE	NA	NA
K562|HBG1--PLEKHA7	K562	fusionseeker	8	FALSE	NA	NA
K562|HBG1--RPL34	K562	fusionseeker	8	FALSE	NA	NA
K562|HBG1--RPL38	K562	fusionseeker	8	FALSE	NA	NA
K562|HBG1--RPS11	K562	fusionseeker	8	FALSE	NA	NA
K562|HBG1--RPS14	K562	fusionseeker	8	FALSE	NA	NA
K562|HBG1--RPS20	K562	fusionseeker	8	FALSE	NA	NA
K562|HBG1--RPS21	K562	fusionseeker	8	FALSE	NA	NA
K562|PDS5A--PABPC1	K562	fusionseeker	8	FALSE	NA	NA
K562|PTMAP5--DTWD2	K562	fusionseeker	8	FALSE	NA	NA
K562|RP11-887P2.3--GLT8D2	K562	fusionseeker	8	FALSE	NA	NA
K562|RPL22--HBG1	K562	fusionseeker	8	FALSE	NA	NA
K562|RPL6--EPHA5	K562	fusionseeker	8	FALSE	NA	NA
K562|SCD--RP11-283C24.1	K562	fusionseeker	8	FALSE	NA	NA
K562|SENP7--BTF3	K562	fusionseeker	8	FALSE	NA	NA
K562|SRP72--TULP4	K562	fusionseeker	8	FALSE	NA	NA
K562|TTC7B--PCNP	K562	fusionseeker	8	FALSE	NA	NA
MCF7|ACTB--COX6C	MCF7	fusionseeker	8	FALSE	NA	NA
MCF7|AHCYL2--CDC26	MCF7	fusionseeker	8	FALSE	NA	NA
MCF7|AMBRA1--MED30	MCF7	fusionseeker	8	FALSE	NA	NA
MCF7|BTF3L4--TANC1	MCF7	fusionseeker	8	FALSE	NA	NA
MCF7|CCBL2--RBMX	MCF7	fusionseeker	8	FALSE	NA	NA
MCF7|CFL1--ACTG1	MCF7	fusionseeker	8	FALSE	NA	NA
MCF7|EEF1A1--HSPB1	MCF7	fusionseeker	8	FALSE	NA	NA
MCF7|EPB42--RPS3AP6	MCF7	fusionseeker	8	FALSE	NA	NA
MCF7|F8--F8A3	MCF7	fusionseeker	8	FALSE	NA	NA
MCF7|FAM172A--CLVS1	MCF7	fusionseeker	8	FALSE	NA	NA
MCF7|FAM174B--H2AFV	MCF7	fusionseeker	8	FALSE	NA	NA
MCF7|GIPC1--SNRPG	MCF7	fusionseeker	8	FALSE	NA	NA
MCF7|HSPB1--RPL12	MCF7	fusionseeker	8	FALSE	NA	NA
MCF7|KRT18--RP1-167F1.2	MCF7	fusionseeker	8	FALSE	NA	NA
MCF7|NUCB2--RPS2	MCF7	fusionseeker	8	FALSE	NA	NA
MCF7|PCNXL2--RP11-192H23.4	MCF7	fusionseeker	8	FALSE	NA	NA
MCF7|PSMA6--UTY	MCF7	fusionseeker	8	FALSE	NA	NA
MCF7|PTMA--RP11-307E17.8	MCF7	fusionseeker	8	FALSE	NA	NA
MCF7|RP11-187O7.3--RP11-255H23.2	MCF7	fusionseeker	8	FALSE	NA	NA
MCF7|RP11-255H23.2--RP6-105D16.1	MCF7	fusionseeker	8	FALSE	NA	NA
MCF7|RPS10-NUDT3--RP11-274B21.1	MCF7	fusionseeker	8	FALSE	NA	NA
MCF7|RPS12--RP1-292B18.4	MCF7	fusionseeker	8	FALSE	NA	NA
MCF7|RPS18P12--PCNP	MCF7	fusionseeker	8	FALSE	NA	NA
MCF7|RPS3AP6--RP11-795H16.3	MCF7	fusionseeker	8	FALSE	NA	NA
MCF7|SERBP1--FRAS1	MCF7	fusionseeker	8	FALSE	NA	NA
MCF7|TFF1--EEF1A1	MCF7	fusionseeker	8	FALSE	NA	NA
MCF7|TPST2--HMGB1P5	MCF7	fusionseeker	8	FALSE	NA	NA
MCF7|TSPAN9--GNGT1	MCF7	fusionseeker	8	FALSE	NA	NA
MCF7|TXNRD1--ACTB	MCF7	fusionseeker	8	FALSE	NA	NA
MCF7|ZSWIM6--FAM133B	MCF7	fusionseeker	8	FALSE	NA	NA
MCF7|DHX30--EMCN	MCF7	fusionseeker	7	FALSE	arriba	NA
A549|AC007405.4--EIF2S2	A549	fusionseeker	7	FALSE	NA	NA
A549|BEST1--FTH1P8	A549	fusionseeker	7	FALSE	NA	NA
A549|CFAP46--CMIP	A549	fusionseeker	7	FALSE	NA	NA
A549|CFAP46--COL23A1	A549	fusionseeker	7	FALSE	NA	NA
A549|CFAP46--TWIST2	A549	fusionseeker	7	FALSE	NA	NA
A549|CH507-513H4.1--FP236383.3	A549	fusionseeker	7	FALSE	NA	NA
A549|CNIH3--AKR1B1	A549	fusionseeker	7	FALSE	NA	NA
A549|COPA--SUMO1	A549	fusionseeker	7	FALSE	NA	NA
A549|FAIM2--PTPRN2	A549	fusionseeker	7	FALSE	NA	NA
A549|FAM19A5--AC006372.4	A549	fusionseeker	7	FALSE	NA	NA
A549|FRMD5--ACTB	A549	fusionseeker	7	FALSE	NA	NA
A549|FTH1--UBE2S	A549	fusionseeker	7	FALSE	NA	NA
A549|FTL--ALDH1A1	A549	fusionseeker	7	FALSE	NA	NA
A549|FTL--RP11-761B3.1	A549	fusionseeker	7	FALSE	NA	NA
A549|GRM4--PTPRN2	A549	fusionseeker	7	FALSE	NA	NA
A549|RPL41--HERC2	A549	fusionseeker	7	FALSE	NA	NA
A549|HSPA8--ZNF98	A549	fusionseeker	7	FALSE	NA	NA
A549|KCP--AC006372.4	A549	fusionseeker	7	FALSE	NA	NA
A549|KNDC1--PTPRN2	A549	fusionseeker	7	FALSE	NA	NA
A549|LYPD8--AUTS2	A549	fusionseeker	7	FALSE	NA	NA
A549|MIR4435-1HG--ANAPC1	A549	fusionseeker	7	FALSE	NA	NA
A549|NIFK-AS1--NPM1	A549	fusionseeker	7	FALSE	NA	NA
A549|PPIAP22--ATG10	A549	fusionseeker	7	FALSE	NA	NA
A549|RP11-189B4.7--COX17	A549	fusionseeker	7	FALSE	NA	NA
A549|RP11-255H23.2--RPSAP9	A549	fusionseeker	7	FALSE	NA	NA
A549|RP11-331N16.1--RP11-511B23.2	A549	fusionseeker	7	FALSE	NA	NA
A549|RPLP1--STAG2	A549	fusionseeker	7	FALSE	NA	NA
A549|RPSAP4--RP11-255H23.2	A549	fusionseeker	7	FALSE	NA	NA
A549|SEC23A--RPLP1	A549	fusionseeker	7	FALSE	NA	NA
A549|TAOK3--RPS2P55	A549	fusionseeker	7	FALSE	NA	NA
A549|TMEM150C--RPS6	A549	fusionseeker	7	FALSE	NA	NA
K562|A2MP1--PTMA	K562	fusionseeker	7	FALSE	NA	NA
K562|RP11-478C19.2--STAU1	K562	fusionseeker	7	FALSE	NA	NA
K562|CHCHD10--TRGC2	K562	fusionseeker	7	FALSE	NA	NA
K562|CMIP--KCP	K562	fusionseeker	7	FALSE	NA	NA
K562|DNM1L--NAP1L1	K562	fusionseeker	7	FALSE	NA	NA
K562|EPB42--RPS3A	K562	fusionseeker	7	FALSE	NA	NA
K562|GGACT--RPS26P6	K562	fusionseeker	7	FALSE	NA	NA
K562|HBG2--EEF1A1	K562	fusionseeker	7	FALSE	NA	NA
K562|HBG2--RPS25	K562	fusionseeker	7	FALSE	NA	NA
K562|HBG1--HBZ	K562	fusionseeker	7	FALSE	NA	NA
K562|HBG2--NDUFB9	K562	fusionseeker	7	FALSE	NA	NA
K562|HBG1--RP11-3P17.4	K562	fusionseeker	7	FALSE	NA	NA
K562|HBG1--RPL23	K562	fusionseeker	7	FALSE	NA	NA
K562|HBG1--RPL36	K562	fusionseeker	7	FALSE	NA	NA
K562|HBG1--RPS16	K562	fusionseeker	7	FALSE	NA	NA
K562|HBG1--RPS19	K562	fusionseeker	7	FALSE	NA	NA
K562|HBG1--RPS27A	K562	fusionseeker	7	FALSE	NA	NA
K562|HBG1--UBE2Q2P2	K562	fusionseeker	7	FALSE	NA	NA
K562|HSF2BP--FAM19A5	K562	fusionseeker	7	FALSE	NA	NA
K562|LSM12--UNC5D	K562	fusionseeker	7	FALSE	NA	NA
K562|LYPD8--NDUFA10	K562	fusionseeker	7	FALSE	NA	NA
K562|MLH1--RPL29	K562	fusionseeker	7	FALSE	NA	NA
K562|MLXIP--FAM19A5	K562	fusionseeker	7	FALSE	NA	NA
K562|MLXIP--PTPRN2	K562	fusionseeker	7	FALSE	NA	NA
K562|MMP23B--NADK	K562	fusionseeker	7	FALSE	NA	NA
K562|NKIRAS1--CORIN	K562	fusionseeker	7	FALSE	NA	NA
K562|RP11-1029J19.5--RP11-849F2.7	K562	fusionseeker	7	FALSE	NA	NA
K562|RP11-256I9.3--LINC00922	K562	fusionseeker	7	FALSE	NA	NA
K562|RPL41--RP11-848P1.9	K562	fusionseeker	7	FALSE	NA	NA
K562|RPL7P9--PNPLA8	K562	fusionseeker	7	FALSE	NA	NA
K562|RPS24--HBG1	K562	fusionseeker	7	FALSE	NA	NA
K562|RWDD4--AC072061.2	K562	fusionseeker	7	FALSE	NA	NA
K562|SLC27A4--TMSB4X	K562	fusionseeker	7	FALSE	NA	NA
K562|SNRPE--KDM4C	K562	fusionseeker	7	FALSE	NA	NA
K562|UQCRFS1--ENTHD1	K562	fusionseeker	7	FALSE	NA	NA
MCF7|AMBRA1--RPS10P3	MCF7	fusionseeker	7	FALSE	NA	NA
MCF7|ARHGAP25--ADAMTS6	MCF7	fusionseeker	7	FALSE	NA	NA
MCF7|BDNF-AS--RPS25	MCF7	fusionseeker	7	FALSE	NA	NA
MCF7|CCSER1--SLC27A4	MCF7	fusionseeker	7	FALSE	NA	NA
MCF7|CLEC2D--NPM1	MCF7	fusionseeker	7	FALSE	NA	NA
MCF7|COMMD1--RPSA	MCF7	fusionseeker	7	FALSE	NA	NA
MCF7|FTH1--RAB7A	MCF7	fusionseeker	7	FALSE	NA	NA
MCF7|GAPDH--RPLP1	MCF7	fusionseeker	7	FALSE	NA	NA
MCF7|GAREM--ZNF833P	MCF7	fusionseeker	7	FALSE	NA	NA
MCF7|HEATR4--ACOT2	MCF7	fusionseeker	7	FALSE	NA	NA
MCF7|HERC2--RPL41P1	MCF7	fusionseeker	7	FALSE	NA	NA
MCF7|IARS2--RPS15A	MCF7	fusionseeker	7	FALSE	NA	NA
MCF7|IL6ST--AC012005.3	MCF7	fusionseeker	7	FALSE	NA	NA
MCF7|KRT18--CMTM8	MCF7	fusionseeker	7	FALSE	NA	NA
MCF7|KRT19--RP11-255H23.2	MCF7	fusionseeker	7	FALSE	NA	NA
MCF7|NEGR1--GDI2	MCF7	fusionseeker	7	FALSE	NA	NA
MCF7|NUDC--DFNB59	MCF7	fusionseeker	7	FALSE	NA	NA
MCF7|PCBP2--FLJ39080	MCF7	fusionseeker	7	FALSE	NA	NA
MCF7|PLEKHA7--GAPDH	MCF7	fusionseeker	7	FALSE	NA	NA
MCF7|PTPRG--RP11-1134I14.2	MCF7	fusionseeker	7	FALSE	NA	NA
MCF7|RBBP4--ANKH	MCF7	fusionseeker	7	FALSE	NA	NA
MCF7|RP11-179A16.1--CCDC144B	MCF7	fusionseeker	7	FALSE	NA	NA
MCF7|RP11-2K6.1--YWHAZ	MCF7	fusionseeker	7	FALSE	NA	NA
MCF7|RP11-511B23.2--AC006386.1	MCF7	fusionseeker	7	FALSE	NA	NA
MCF7|RP11-756P10.6--MTRF1L	MCF7	fusionseeker	7	FALSE	NA	NA
MCF7|RP11-764K9.2--CBWD3	MCF7	fusionseeker	7	FALSE	NA	NA
MCF7|RPL29--HSPB1	MCF7	fusionseeker	7	FALSE	NA	NA
MCF7|RPL5--SNRPN	MCF7	fusionseeker	7	FALSE	NA	NA
MCF7|RPLP1--ATOX1	MCF7	fusionseeker	7	FALSE	NA	NA
MCF7|RPLP1--STAG2	MCF7	fusionseeker	7	FALSE	NA	NA
MCF7|RPS17--HSPB1	MCF7	fusionseeker	7	FALSE	NA	NA
MCF7|RPS19--HSPB1	MCF7	fusionseeker	7	FALSE	NA	NA
MCF7|RPS2--RPL8	MCF7	fusionseeker	7	FALSE	NA	NA
MCF7|RPS24--FLVCR2	MCF7	fusionseeker	7	FALSE	NA	NA
MCF7|RPS3--GREB1	MCF7	fusionseeker	7	FALSE	NA	NA
MCF7|RPS4XP6--PIN4	MCF7	fusionseeker	7	FALSE	NA	NA
MCF7|SMOC1--RP11-244M2.1	MCF7	fusionseeker	7	FALSE	NA	NA
MCF7|SPTSSB--HSPB1	MCF7	fusionseeker	7	FALSE	NA	NA
MCF7|SRP14--RPL14	MCF7	fusionseeker	7	FALSE	NA	NA
MCF7|TMEM150C--RPS6	MCF7	fusionseeker	7	FALSE	NA	NA
MCF7|TTC7B--PCNP	MCF7	fusionseeker	7	FALSE	NA	NA
A549|AC006372.4--PTPRN2	A549	fusionseeker	6	FALSE	NA	NA
A549|AEBP2--PDCD5	A549	fusionseeker	6	FALSE	NA	NA
A549|RP11-478C19.2--STAU1	A549	fusionseeker	6	FALSE	NA	NA
A549|BEST1--RP11-157I4.4	A549	fusionseeker	6	FALSE	NA	NA
A549|CFAP46--AC010987.5	A549	fusionseeker	6	FALSE	NA	NA
A549|CFAP46--MLXIP	A549	fusionseeker	6	FALSE	NA	NA
A549|COX20--TET1	A549	fusionseeker	6	FALSE	NA	NA
A549|CPEB3--NHP2	A549	fusionseeker	6	FALSE	NA	NA
A549|EEF1A1P13--STEAP1B	A549	fusionseeker	6	FALSE	NA	NA
A549|EIF4B--LHFPL3	A549	fusionseeker	6	FALSE	NA	NA
A549|F8--F8A3	A549	fusionseeker	6	FALSE	NA	NA
A549|FTH1--COPS6	A549	fusionseeker	6	FALSE	NA	NA
A549|FTH1--MXD3	A549	fusionseeker	6	FALSE	NA	NA
A549|FTL--AKR1B10	A549	fusionseeker	6	FALSE	NA	NA
A549|FTL--RPS20	A549	fusionseeker	6	FALSE	NA	NA
A549|FTL--RPS21	A549	fusionseeker	6	FALSE	NA	NA
A549|FTL--RPS6	A549	fusionseeker	6	FALSE	NA	NA
A549|FTL--TRABD2A	A549	fusionseeker	6	FALSE	NA	NA
A549|GRM4--AC006372.4	A549	fusionseeker	6	FALSE	NA	NA
A549|HSF2BP--FAM19A5	A549	fusionseeker	6	FALSE	NA	NA
A549|KRT8--FTL	A549	fusionseeker	6	FALSE	NA	NA
A549|LINC00313--FAM19A5	A549	fusionseeker	6	FALSE	NA	NA
A549|MLXIP--RP1-137D17.1	A549	fusionseeker	6	FALSE	NA	NA
A549|PCNXL2--RP11-192H23.4	A549	fusionseeker	6	FALSE	NA	NA
A549|POLQ--RPL7A	A549	fusionseeker	6	FALSE	NA	NA
A549|PTPN14--AP3S1	A549	fusionseeker	6	FALSE	NA	NA
A549|RAP1B--KCTD2	A549	fusionseeker	6	FALSE	NA	NA
A549|RP11-314N13.10--FKBP1C	A549	fusionseeker	6	FALSE	NA	NA
A549|RP11-382A20.5--RPS6KA2	A549	fusionseeker	6	FALSE	NA	NA
A549|RP11-432J24.5--KCP	A549	fusionseeker	6	FALSE	NA	NA
A549|RPL5--SNRPN	A549	fusionseeker	6	FALSE	NA	NA
A549|RPL6--EPHA5	A549	fusionseeker	6	FALSE	NA	NA
A549|RPS24--FLVCR2	A549	fusionseeker	6	FALSE	NA	NA
A549|RPS27--TSPAN9	A549	fusionseeker	6	FALSE	NA	NA
A549|RPS29--DAPK1	A549	fusionseeker	6	FALSE	NA	NA
A549|RPS3--RP11-179A16.1	A549	fusionseeker	6	FALSE	NA	NA
A549|RPS4XP2--PIN4	A549	fusionseeker	6	FALSE	NA	NA
A549|RPS5--DSE	A549	fusionseeker	6	FALSE	NA	NA
A549|RPS7P10--RP11-192H23.4	A549	fusionseeker	6	FALSE	NA	NA
A549|S100A6--RPL37A	A549	fusionseeker	6	FALSE	NA	NA
A549|SNRPB--RPS12	A549	fusionseeker	6	FALSE	NA	NA
A549|SQSTM1--NONO	A549	fusionseeker	6	FALSE	NA	NA
A549|STK32C--CFAP46	A549	fusionseeker	6	FALSE	NA	NA
A549|STK32C--PTPRN2	A549	fusionseeker	6	FALSE	NA	NA
A549|TMEM131--HMGN1	A549	fusionseeker	6	FALSE	NA	NA
A549|TRIM28--CTD-2066L21.3	A549	fusionseeker	6	FALSE	NA	NA
A549|WDR47--RP11-215A21.2	A549	fusionseeker	6	FALSE	NA	NA
K562|AB019441.29--CTD-2066L21.3	K562	fusionseeker	6	FALSE	NA	NA
K562|ARMC2--PTCD1	K562	fusionseeker	6	FALSE	NA	NA
K562|BCAS3--RP11-3P17.4	K562	fusionseeker	6	FALSE	NA	NA
K562|BCAS4--TMSB4X	K562	fusionseeker	6	FALSE	NA	NA
K562|BCL2L14--PTMA	K562	fusionseeker	6	FALSE	NA	NA
K562|CCDC30--TMSB4X	K562	fusionseeker	6	FALSE	NA	NA
K562|CD24--TTTY14	K562	fusionseeker	6	FALSE	NA	NA
K562|CFAP46--PTPRN2	K562	fusionseeker	6	FALSE	NA	NA
K562|DPYD--SEC63	K562	fusionseeker	6	FALSE	NA	NA
K562|E2F4--RPL14	K562	fusionseeker	6	FALSE	NA	NA
K562|FAM65B--PPIA	K562	fusionseeker	6	FALSE	NA	NA
K562|GNG5--AMMECR1	K562	fusionseeker	6	FALSE	NA	NA
K562|HBG2--IQCG	K562	fusionseeker	6	FALSE	NA	NA
K562|HBG2--PLEKHA7	K562	fusionseeker	6	FALSE	NA	NA
K562|HBG1--RP11-51O6.1	K562	fusionseeker	6	FALSE	NA	NA
K562|HBG2--RPL34	K562	fusionseeker	6	FALSE	NA	NA
K562|HBG2--RPL36	K562	fusionseeker	6	FALSE	NA	NA
K562|HBG2--RPS16	K562	fusionseeker	6	FALSE	NA	NA
K562|HBG2--RPS19	K562	fusionseeker	6	FALSE	NA	NA
K562|HBG2--RPS21	K562	fusionseeker	6	FALSE	NA	NA
K562|HBG2--RPS23P8	K562	fusionseeker	6	FALSE	NA	NA
K562|HBG1--C18orf32	K562	fusionseeker	6	FALSE	NA	NA
K562|HBG1--CAND2	K562	fusionseeker	6	FALSE	NA	NA
K562|HBG2--CTD-2192J16.15	K562	fusionseeker	6	FALSE	NA	NA
K562|HBG1--EEF1A1	K562	fusionseeker	6	FALSE	NA	NA
K562|HBG2--H2AFZ	K562	fusionseeker	6	FALSE	NA	NA
K562|HBG1--PCNP	K562	fusionseeker	6	FALSE	NA	NA
K562|HBG1--PIN4	K562	fusionseeker	6	FALSE	NA	NA
K562|HBG1--RP11-255H23.2	K562	fusionseeker	6	FALSE	NA	NA
K562|HBG1--RP11-849F2.7	K562	fusionseeker	6	FALSE	NA	NA
K562|HBG1--RPS17	K562	fusionseeker	6	FALSE	NA	NA
K562|HBG1--RPS25	K562	fusionseeker	6	FALSE	NA	NA
K562|HBG2--RPS29	K562	fusionseeker	6	FALSE	NA	NA
K562|HBG1--RPS3	K562	fusionseeker	6	FALSE	NA	NA
K562|HBG1--RPS6	K562	fusionseeker	6	FALSE	NA	NA
K562|ITGB1--EMR3	K562	fusionseeker	6	FALSE	NA	NA
K562|NBPF13P--IGF2BP2	K562	fusionseeker	6	FALSE	NA	NA
K562|NSUN7--ARL4A	K562	fusionseeker	6	FALSE	NA	NA
K562|PCBP2--FLJ39080	K562	fusionseeker	6	FALSE	NA	NA
K562|PLEKHA7--OOEP	K562	fusionseeker	6	FALSE	NA	NA
K562|PPIAP22--ATG10	K562	fusionseeker	6	FALSE	NA	NA
K562|RP11-153M3.1--CDH12	K562	fusionseeker	6	FALSE	NA	NA
K562|RP11-159F24.3--STEAP1B	K562	fusionseeker	6	FALSE	NA	NA
K562|RP11-255H23.2--RP6-105D16.1	K562	fusionseeker	6	FALSE	NA	NA
K562|RP11-331N16.1--RP11-511B23.2	K562	fusionseeker	6	FALSE	NA	NA
K562|RP11-350G8.4--RP11-255H23.2	K562	fusionseeker	6	FALSE	NA	NA
K562|RP11-572P18.1--HBG1	K562	fusionseeker	6	FALSE	NA	NA
K562|RP4-669L17.10--RP11-206L10.1	K562	fusionseeker	6	FALSE	NA	NA
K562|RPL10A--RP11-1134I14.2	K562	fusionseeker	6	FALSE	NA	NA
K562|RPL11--HBG1	K562	fusionseeker	6	FALSE	NA	NA
K562|RPL14--TBP	K562	fusionseeker	6	FALSE	NA	NA
K562|RPL5--IFT46	K562	fusionseeker	6	FALSE	NA	NA
K562|RPL6P27--EEF1A1	K562	fusionseeker	6	FALSE	NA	NA
K562|RPL7P9--HBG1	K562	fusionseeker	6	FALSE	NA	NA
K562|RPS10-NUDT3--RP11-274B21.1	K562	fusionseeker	6	FALSE	NA	NA
K562|RPS2--GAB1	K562	fusionseeker	6	FALSE	NA	NA
K562|RPS2--INVS	K562	fusionseeker	6	FALSE	NA	NA
K562|RPS27--HBG1	K562	fusionseeker	6	FALSE	NA	NA
K562|SLC25A23--RP11-384F7.1	K562	fusionseeker	6	FALSE	NA	NA
K562|SMOC1--SEMA6D	K562	fusionseeker	6	FALSE	NA	NA
K562|SNHG16--LINC01492	K562	fusionseeker	6	FALSE	NA	NA
K562|TBC1D28--PAIP1	K562	fusionseeker	6	FALSE	NA	NA
K562|TBCA--ACTB	K562	fusionseeker	6	FALSE	NA	NA
K562|TMEM131--HMGN1	K562	fusionseeker	6	FALSE	NA	NA
K562|TSPAN9--RPS18	K562	fusionseeker	6	FALSE	NA	NA
K562|UPF3A--CCDC144CP	K562	fusionseeker	6	FALSE	NA	NA
K562|YBX1--EFCAB10	K562	fusionseeker	6	FALSE	NA	NA
K562|ZNF286B--UBE2S	K562	fusionseeker	6	FALSE	NA	NA
MCF7|AB019441.29--CTD-2066L21.3	MCF7	fusionseeker	6	FALSE	NA	NA
MCF7|ABHD2--VAPA	MCF7	fusionseeker	6	FALSE	NA	NA
MCF7|AC018890.6--ZGRF1	MCF7	fusionseeker	6	FALSE	NA	NA
MCF7|ADIPOR2--PIN4	MCF7	fusionseeker	6	FALSE	NA	NA
MCF7|AEBP2--PDCD5	MCF7	fusionseeker	6	FALSE	NA	NA
MCF7|AF127936.9--NRIP1	MCF7	fusionseeker	6	FALSE	NA	NA
MCF7|ALDOA--TFF1	MCF7	fusionseeker	6	FALSE	NA	NA
MCF7|AP000350.10--RPL8	MCF7	fusionseeker	6	FALSE	NA	NA
MCF7|BCL2L2-PABPN1--ZNF600	MCF7	fusionseeker	6	FALSE	NA	NA
MCF7|C18orf32--LRCH3	MCF7	fusionseeker	6	FALSE	NA	NA
MCF7|CDC20--RP11-276H19.2	MCF7	fusionseeker	6	FALSE	NA	NA
MCF7|CDC42--GBA3	MCF7	fusionseeker	6	FALSE	NA	NA
MCF7|CH507-513H4.1--FP236383.3	MCF7	fusionseeker	6	FALSE	NA	NA
MCF7|DCAF6--GCSH	MCF7	fusionseeker	6	FALSE	NA	NA
MCF7|DGKI--AC012005.3	MCF7	fusionseeker	6	FALSE	NA	NA
MCF7|EEF1A1P24--STEAP1B	MCF7	fusionseeker	6	FALSE	NA	NA
MCF7|EPB42--RPS3A	MCF7	fusionseeker	6	FALSE	NA	NA
MCF7|GAPDH--HSPB1	MCF7	fusionseeker	6	FALSE	NA	NA
MCF7|GAPDH--PIN4	MCF7	fusionseeker	6	FALSE	NA	NA
MCF7|GAPDH--RPL12	MCF7	fusionseeker	6	FALSE	NA	NA
MCF7|GAPDH--RPL30	MCF7	fusionseeker	6	FALSE	NA	NA
MCF7|GAPDH--RPL7A	MCF7	fusionseeker	6	FALSE	NA	NA
MCF7|GGACT--PTPRD	MCF7	fusionseeker	6	FALSE	NA	NA
MCF7|HDGF--RPS3	MCF7	fusionseeker	6	FALSE	NA	NA
MCF7|HIP1R--DNAH11	MCF7	fusionseeker	6	FALSE	NA	NA
MCF7|HSPB1--EEF1A1P5	MCF7	fusionseeker	6	FALSE	NA	NA
MCF7|HSPB1--RPL8	MCF7	fusionseeker	6	FALSE	NA	NA
MCF7|IL6ST--AC006386.1	MCF7	fusionseeker	6	FALSE	NA	NA
MCF7|ITGB1--EMR3	MCF7	fusionseeker	6	FALSE	NA	NA
MCF7|KIZ--RPS15AP38	MCF7	fusionseeker	6	FALSE	NA	NA
MCF7|KRT19--AP000350.10	MCF7	fusionseeker	6	FALSE	NA	NA
MCF7|NPIPA3--NOMO2	MCF7	fusionseeker	6	FALSE	NA	NA
MCF7|OPHN1--PGK1	MCF7	fusionseeker	6	FALSE	NA	NA
MCF7|PABPC1--PTK2	MCF7	fusionseeker	6	FALSE	NA	NA
MCF7|PEMT--STEAP1B	MCF7	fusionseeker	6	FALSE	NA	NA
MCF7|PRKCA--PHACTR1	MCF7	fusionseeker	6	FALSE	NA	NA
MCF7|PTMA--HSPB1	MCF7	fusionseeker	6	FALSE	NA	NA
MCF7|RAB1A--STAT1	MCF7	fusionseeker	6	FALSE	NA	NA
MCF7|RNF157--ATF4	MCF7	fusionseeker	6	FALSE	NA	NA
MCF7|RP11-1029J19.5--RPL26P19	MCF7	fusionseeker	6	FALSE	NA	NA
MCF7|RP11-136C24.3--FAM120A	MCF7	fusionseeker	6	FALSE	NA	NA
MCF7|RP11-511B23.2--AC012005.3	MCF7	fusionseeker	6	FALSE	NA	NA
MCF7|RP11-848P1.9--RPL41P1	MCF7	fusionseeker	6	FALSE	NA	NA
MCF7|RP11-849F2.5--RPL26P19	MCF7	fusionseeker	6	FALSE	NA	NA
MCF7|RP11-849F2.7--GNAS	MCF7	fusionseeker	6	FALSE	NA	NA
MCF7|RP11-87H9.2--CBWD5	MCF7	fusionseeker	6	FALSE	NA	NA
MCF7|RP11-87H9.2--RP11-764K9.2	MCF7	fusionseeker	6	FALSE	NA	NA
MCF7|RPL13AP5--GAPDH	MCF7	fusionseeker	6	FALSE	NA	NA
MCF7|RPL24P4--MAMDC2	MCF7	fusionseeker	6	FALSE	NA	NA
MCF7|RPL31--TMSB4X	MCF7	fusionseeker	6	FALSE	NA	NA
MCF7|RPL37A--PABPC1	MCF7	fusionseeker	6	FALSE	NA	NA
MCF7|HSPB1--DGKI	MCF7	fusionseeker	6	FALSE	NA	NA
MCF7|RPL5--ACOXL	MCF7	fusionseeker	6	FALSE	NA	NA
MCF7|RPL5--RP5-896L10.1	MCF7	fusionseeker	6	FALSE	NA	NA
MCF7|RPLP0--HSPB1	MCF7	fusionseeker	6	FALSE	NA	NA
MCF7|RPLP1--HSPB1	MCF7	fusionseeker	6	FALSE	NA	NA
MCF7|RPS15A--ACTB	MCF7	fusionseeker	6	FALSE	NA	NA
MCF7|RPS15A--HSPB1	MCF7	fusionseeker	6	FALSE	NA	NA
MCF7|RPS15AP11--KIZ	MCF7	fusionseeker	6	FALSE	NA	NA
MCF7|RPS23--ACTB	MCF7	fusionseeker	6	FALSE	NA	NA
MCF7|RPS25--RPL12	MCF7	fusionseeker	6	FALSE	NA	NA
MCF7|RPS27--PPP1R12B	MCF7	fusionseeker	6	FALSE	NA	NA
MCF7|RPS29--DAPK1	MCF7	fusionseeker	6	FALSE	NA	NA
MCF7|RPS3--H3F3B	MCF7	fusionseeker	6	FALSE	NA	NA
MCF7|RPS3--KRT19	MCF7	fusionseeker	6	FALSE	NA	NA
MCF7|RPS5--DSE	MCF7	fusionseeker	6	FALSE	NA	NA
MCF7|RPSAP4--RP11-255H23.2	MCF7	fusionseeker	6	FALSE	NA	NA
MCF7|SIK3--TSPAN9	MCF7	fusionseeker	6	FALSE	NA	NA
MCF7|SIMC1--MTCP1	MCF7	fusionseeker	6	FALSE	NA	NA
MCF7|TCEB2P2--ST14	MCF7	fusionseeker	6	FALSE	NA	NA
MCF7|TFF1--HSPB1	MCF7	fusionseeker	6	FALSE	NA	NA
MCF7|TRIP11--DTWD2	MCF7	fusionseeker	6	FALSE	NA	NA
MCF7|TSPAN9--KRT19	MCF7	fusionseeker	6	FALSE	NA	NA
MCF7|TXNRD1--TPT1	MCF7	fusionseeker	6	FALSE	NA	NA
MCF7|VTI1A--STEAP1B	MCF7	fusionseeker	6	FALSE	NA	NA
MCF7|WDR47--RP11-215A21.2	MCF7	fusionseeker	6	FALSE	NA	NA
MCF7|YWHAZ--CASK	MCF7	fusionseeker	6	FALSE	NA	NA
MCF7|ZNF286A--UBE2S	MCF7	fusionseeker	6	FALSE	NA	NA
MCF7|C3orf35--LRRFIP2	MCF7	fusionseeker	5	FALSE	arriba	NA
MCF7|RPS6KB1--TRIM37	MCF7	fusionseeker	5	FALSE	arriba	NA
A549|AC092670.1--IL6ST	A549	fusionseeker	5	FALSE	NA	NA
A549|AHCYL2--CDC26	A549	fusionseeker	5	FALSE	NA	NA
A549|ANKUB1--SEMA3E	A549	fusionseeker	5	FALSE	NA	NA
A549|ANXA2--RPL31	A549	fusionseeker	5	FALSE	NA	NA
A549|C1orf106--SLC9C1	A549	fusionseeker	5	FALSE	NA	NA
A549|CCBL2--RBMX	A549	fusionseeker	5	FALSE	NA	NA
A549|CDC20--RP11-276H19.2	A549	fusionseeker	5	FALSE	NA	NA
A549|CFAP46--FAM19A5	A549	fusionseeker	5	FALSE	NA	NA
A549|CLEC2D--NPM1	A549	fusionseeker	5	FALSE	NA	NA
A549|CMIP--GRM4	A549	fusionseeker	5	FALSE	NA	NA
A549|DAB1--GGACT	A549	fusionseeker	5	FALSE	NA	NA
A549|DIP2C--KCP	A549	fusionseeker	5	FALSE	NA	NA
A549|EEF1A1P11--STEAP1B	A549	fusionseeker	5	FALSE	NA	NA
A549|EIF4A1P4--SENP3-EIF4A1	A549	fusionseeker	5	FALSE	NA	NA
A549|FAIM2--COL23A1	A549	fusionseeker	5	FALSE	NA	NA
A549|FAM133DP--ZSWIM6	A549	fusionseeker	5	FALSE	NA	NA
A549|FAM172A--CLVS1	A549	fusionseeker	5	FALSE	NA	NA
A549|FTH1--PPM1G	A549	fusionseeker	5	FALSE	NA	NA
A549|FTH1--RPS20	A549	fusionseeker	5	FALSE	NA	NA
A549|FTL--CANX	A549	fusionseeker	5	FALSE	NA	NA
A549|FTL--TMSB4X	A549	fusionseeker	5	FALSE	NA	NA
A549|FTL--TXN	A549	fusionseeker	5	FALSE	NA	NA
A549|GAL3ST2--KCP	A549	fusionseeker	5	FALSE	NA	NA
A549|GAPDH--RPS19	A549	fusionseeker	5	FALSE	NA	NA
A549|GGACT--GS1-184P14.2	A549	fusionseeker	5	FALSE	NA	NA
A549|HSF2BP--KCP	A549	fusionseeker	5	FALSE	NA	NA
A549|IARS2--RPS15A	A549	fusionseeker	5	FALSE	NA	NA
A549|KCP--SEMA4D	A549	fusionseeker	5	FALSE	NA	NA
A549|KMT2D--SLC22A2	A549	fusionseeker	5	FALSE	NA	NA
A549|KRT18--RP1-167F1.2	A549	fusionseeker	5	FALSE	NA	NA
A549|KRT8--PPP2R2B	A549	fusionseeker	5	FALSE	NA	NA
A549|KRT86--G6PD	A549	fusionseeker	5	FALSE	NA	NA
A549|KRT86--RPS27A	A549	fusionseeker	5	FALSE	NA	NA
A549|LDHB--PPIA	A549	fusionseeker	5	FALSE	NA	NA
A549|LINC01193--ZNF43	A549	fusionseeker	5	FALSE	NA	NA
A549|LYPD8--GAL3ST2	A549	fusionseeker	5	FALSE	NA	NA
A549|LYPD8--HSF2BP	A549	fusionseeker	5	FALSE	NA	NA
A549|LYPD8--KCP	A549	fusionseeker	5	FALSE	NA	NA
A549|MLXIP--AUTS2	A549	fusionseeker	5	FALSE	NA	NA
A549|MLXIP--NDUFA10	A549	fusionseeker	5	FALSE	NA	NA
A549|MTHFD1L--NUDCD3	A549	fusionseeker	5	FALSE	NA	NA
A549|NDUFA10--AC006372.4	A549	fusionseeker	5	FALSE	NA	NA
A549|PCCB--GRM4	A549	fusionseeker	5	FALSE	NA	NA
A549|PIGK--LRCH3	A549	fusionseeker	5	FALSE	NA	NA
A549|PRDM15--KCP	A549	fusionseeker	5	FALSE	NA	NA
A549|PTMA--RP11-307E17.8	A549	fusionseeker	5	FALSE	NA	NA
A549|RAN--FTL	A549	fusionseeker	5	FALSE	NA	NA
A549|RP11-159F24.3--STEAP1B	A549	fusionseeker	5	FALSE	NA	NA
A549|RP11-432J24.5--PTPRN2	A549	fusionseeker	5	FALSE	NA	NA
A549|RP11-672A2.1--PARP4P1	A549	fusionseeker	5	FALSE	NA	NA
A549|RP11-87H9.2--CBWD3	A549	fusionseeker	5	FALSE	NA	NA
A549|RP11-87H9.2--CBWD5	A549	fusionseeker	5	FALSE	NA	NA
A549|RPL6--DGKI	A549	fusionseeker	5	FALSE	NA	NA
A549|RPLP1--FTL	A549	fusionseeker	5	FALSE	NA	NA
A549|RPS16--FTL	A549	fusionseeker	5	FALSE	NA	NA
A549|RPS17--ZNF141	A549	fusionseeker	5	FALSE	NA	NA
A549|RPS19--FTL	A549	fusionseeker	5	FALSE	NA	NA
A549|RPS19--RPL35	A549	fusionseeker	5	FALSE	NA	NA
A549|RPS2--GAB1	A549	fusionseeker	5	FALSE	NA	NA
A549|RPS26--ANK2	A549	fusionseeker	5	FALSE	NA	NA
A549|RPS3--BTF3	A549	fusionseeker	5	FALSE	NA	NA
A549|SENP1--KCP	A549	fusionseeker	5	FALSE	NA	NA
A549|TMEM222--ACTG1	A549	fusionseeker	5	FALSE	NA	NA
A549|TPM3--AC010149.4	A549	fusionseeker	5	FALSE	NA	NA
A549|TPM3--C15orf41	A549	fusionseeker	5	FALSE	NA	NA
A549|TUBA1C--CNKSR2	A549	fusionseeker	5	FALSE	NA	NA
A549|USMG5--FTX	A549	fusionseeker	5	FALSE	NA	NA
A549|YBX1--EFCAB10	A549	fusionseeker	5	FALSE	NA	NA
A549|ZNF286B--UBE2S	A549	fusionseeker	5	FALSE	NA	NA
A549|ZNF652--SNHG5	A549	fusionseeker	5	FALSE	NA	NA
K562|AMBRA1--RP3-375P9.2	K562	fusionseeker	5	FALSE	NA	NA
K562|AP3B1--HSP90AB1	K562	fusionseeker	5	FALSE	NA	NA
K562|ARL17B--LRRC37A2	K562	fusionseeker	5	FALSE	NA	NA
K562|BEST1--RP11-157I4.4	K562	fusionseeker	5	FALSE	NA	NA
K562|CORIN--RPL15P3	K562	fusionseeker	5	FALSE	NA	NA
K562|CTC-471J1.8--RPL37	K562	fusionseeker	5	FALSE	NA	NA
K562|CTD-2192J16.15--ASTN2	K562	fusionseeker	5	FALSE	NA	NA
K562|DCAF6--GCSH	K562	fusionseeker	5	FALSE	NA	NA
K562|DONSON--PPP2R3A	K562	fusionseeker	5	FALSE	NA	NA
K562|EIF1--CH507-528H12.1	K562	fusionseeker	5	FALSE	NA	NA
K562|HBG2--CAND2	K562	fusionseeker	5	FALSE	NA	NA
K562|HBG1--BEST1	K562	fusionseeker	5	FALSE	NA	NA
K562|HBG2--FTL	K562	fusionseeker	5	FALSE	NA	NA
K562|HBG2--OOEP	K562	fusionseeker	5	FALSE	NA	NA
K562|HBG2--RPL31	K562	fusionseeker	5	FALSE	NA	NA
K562|HBG2--RPL35	K562	fusionseeker	5	FALSE	NA	NA
K562|HBG2--RPLP1	K562	fusionseeker	5	FALSE	NA	NA
K562|HBG2--RPS11	K562	fusionseeker	5	FALSE	NA	NA
K562|HBG2--RPS13	K562	fusionseeker	5	FALSE	NA	NA
K562|HBG2--RPS15A	K562	fusionseeker	5	FALSE	NA	NA
K562|HBG2--RPS20	K562	fusionseeker	5	FALSE	NA	NA
K562|HBG2--ATG10	K562	fusionseeker	5	FALSE	NA	NA
K562|HBG2--RPS27A	K562	fusionseeker	5	FALSE	NA	NA
K562|HBG2--RPS6	K562	fusionseeker	5	FALSE	NA	NA
K562|AC104389.28--HBE1	K562	fusionseeker	5	FALSE	NA	NA
K562|HBG2--IL6ST	K562	fusionseeker	5	FALSE	NA	NA
K562|HBG1--LRRC75A-AS1	K562	fusionseeker	5	FALSE	NA	NA
K562|HBG2--RP11-274B21.1	K562	fusionseeker	5	FALSE	NA	NA
K562|HBG1--RP11-511B23.2	K562	fusionseeker	5	FALSE	NA	NA
K562|HBG1--RPL13	K562	fusionseeker	5	FALSE	NA	NA
K562|HBG2--RPL30	K562	fusionseeker	5	FALSE	NA	NA
K562|HBG1--RPS13	K562	fusionseeker	5	FALSE	NA	NA
K562|HBG1--RPS15A	K562	fusionseeker	5	FALSE	NA	NA
K562|HBG1--RPS5	K562	fusionseeker	5	FALSE	NA	NA
K562|KRT18--PCDH11X	K562	fusionseeker	5	FALSE	NA	NA
K562|LYPD8--RP1-137D17.1	K562	fusionseeker	5	FALSE	NA	NA
K562|MALAT1--HBA1	K562	fusionseeker	5	FALSE	NA	NA
K562|MMS19--LDHA	K562	fusionseeker	5	FALSE	NA	NA
K562|NFE2L1--RABGAP1	K562	fusionseeker	5	FALSE	NA	NA
K562|PCNXL2--RP11-192H23.4	K562	fusionseeker	5	FALSE	NA	NA
K562|PCNXL2--RPS7	K562	fusionseeker	5	FALSE	NA	NA
K562|PPIAP22--FAM65B	K562	fusionseeker	5	FALSE	NA	NA
K562|PPP1R12B--RP11-761N21.2	K562	fusionseeker	5	FALSE	NA	NA
K562|PPP2R5A--RP11-3P17.4	K562	fusionseeker	5	FALSE	NA	NA
K562|RBFOX2--AC006386.1	K562	fusionseeker	5	FALSE	NA	NA
K562|RP11-159L20.2--RPL27	K562	fusionseeker	5	FALSE	NA	NA
K562|RP11-179A16.1--CCDC144B	K562	fusionseeker	5	FALSE	NA	NA
K562|RP11-187O7.3--RP11-255H23.2	K562	fusionseeker	5	FALSE	NA	NA
K562|RP11-314N13.10--FKBP1C	K562	fusionseeker	5	FALSE	NA	NA
K562|RP11-511B23.2--RP11-848P1.9	K562	fusionseeker	5	FALSE	NA	NA
K562|RP11-756P10.6--MTRF1L	K562	fusionseeker	5	FALSE	NA	NA
K562|RPL22--HBG2	K562	fusionseeker	5	FALSE	NA	NA
K562|RPL27A--RPS12	K562	fusionseeker	5	FALSE	NA	NA
K562|RPL28--EEF1A1	K562	fusionseeker	5	FALSE	NA	NA
K562|RPL5--HBG1	K562	fusionseeker	5	FALSE	NA	NA
K562|RPLP2--RPS19	K562	fusionseeker	5	FALSE	NA	NA
K562|RPS24--FLVCR2	K562	fusionseeker	5	FALSE	NA	NA
K562|RPS3AP5--BAIAP2L1	K562	fusionseeker	5	FALSE	NA	NA
K562|RPS7P10--RP11-192H23.4	K562	fusionseeker	5	FALSE	NA	NA
K562|SBF2--DNAJC25-GNG10	K562	fusionseeker	5	FALSE	NA	NA
K562|SENP1--KCP	K562	fusionseeker	5	FALSE	NA	NA
K562|SMCO4--SRP14	K562	fusionseeker	5	FALSE	NA	NA
K562|ST13--SLC9A9	K562	fusionseeker	5	FALSE	NA	NA
K562|STAT6--NAB2	K562	fusionseeker	5	FALSE	NA	NA
K562|STX3--FABP5	K562	fusionseeker	5	FALSE	NA	NA
K562|CKS1B--SVIL	K562	fusionseeker	5	FALSE	NA	NA
K562|TPM3--AC010149.4	K562	fusionseeker	5	FALSE	NA	NA
K562|TXNRD1--PTPRD	K562	fusionseeker	5	FALSE	NA	NA
K562|UBC--RPL28	K562	fusionseeker	5	FALSE	NA	NA
K562|YWHAQ--EFCAB6	K562	fusionseeker	5	FALSE	NA	NA
MCF7|AASDH--RPL7A	MCF7	fusionseeker	5	FALSE	NA	NA
MCF7|AC004448.5--AC022210.2	MCF7	fusionseeker	5	FALSE	NA	NA
MCF7|ACTB--PIN4	MCF7	fusionseeker	5	FALSE	NA	NA
MCF7|AL591893.1--CLDN4	MCF7	fusionseeker	5	FALSE	NA	NA
MCF7|AL591893.1--RPL31	MCF7	fusionseeker	5	FALSE	NA	NA
MCF7|AMBRA1--RP11-255H23.2	MCF7	fusionseeker	5	FALSE	NA	NA
MCF7|ANK2--AC073072.7	MCF7	fusionseeker	5	FALSE	NA	NA
MCF7|ANK2--CADPS2	MCF7	fusionseeker	5	FALSE	NA	NA
MCF7|ANK2--NSMAF	MCF7	fusionseeker	5	FALSE	NA	NA
MCF7|ZKSCAN5--ARPC1A	MCF7	fusionseeker	5	FALSE	NA	NA
MCF7|RP11-478C19.2--STAU1	MCF7	fusionseeker	5	FALSE	NA	NA
MCF7|ATP5L--CYB5R3	MCF7	fusionseeker	5	FALSE	NA	NA
MCF7|CEP164P1--RPS19	MCF7	fusionseeker	5	FALSE	NA	NA
MCF7|CTC-471J1.8--RPL37	MCF7	fusionseeker	5	FALSE	NA	NA
MCF7|CTCF--RPL12	MCF7	fusionseeker	5	FALSE	NA	NA
MCF7|DACH1--AC018890.6	MCF7	fusionseeker	5	FALSE	NA	NA
MCF7|DGKZ--RP11-65B7.2	MCF7	fusionseeker	5	FALSE	NA	NA
MCF7|EEF1A1--TPK1	MCF7	fusionseeker	5	FALSE	NA	NA
MCF7|ELP2--CH507-528H12.1	MCF7	fusionseeker	5	FALSE	NA	NA
MCF7|ENTPD5--IL6ST	MCF7	fusionseeker	5	FALSE	NA	NA
MCF7|FTH1--RPS16	MCF7	fusionseeker	5	FALSE	NA	NA
MCF7|FTL--RPL30	MCF7	fusionseeker	5	FALSE	NA	NA
MCF7|GAPDH--EEF1A1P5	MCF7	fusionseeker	5	FALSE	NA	NA
MCF7|GAPDH--RPL8	MCF7	fusionseeker	5	FALSE	NA	NA
MCF7|GAPDH--RPS3A	MCF7	fusionseeker	5	FALSE	NA	NA
MCF7|GAPDH--ZNF609	MCF7	fusionseeker	5	FALSE	NA	NA
MCF7|HMGN1--TFF1	MCF7	fusionseeker	5	FALSE	NA	NA
MCF7|HNRNPA1P48--FAM126B	MCF7	fusionseeker	5	FALSE	NA	NA
MCF7|HSP90AA1--ANKDD1A	MCF7	fusionseeker	5	FALSE	NA	NA
MCF7|HSPB1--RPL30	MCF7	fusionseeker	5	FALSE	NA	NA
MCF7|IL6ST--HSPB1	MCF7	fusionseeker	5	FALSE	NA	NA
MCF7|INTS6-AS1--PIN4	MCF7	fusionseeker	5	FALSE	NA	NA
MCF7|KIZ--RP3-340B19.2	MCF7	fusionseeker	5	FALSE	NA	NA
MCF7|KRT8--RPLP0	MCF7	fusionseeker	5	FALSE	NA	NA
MCF7|KRT18--DGKI	MCF7	fusionseeker	5	FALSE	NA	NA
MCF7|KRT8--DZIP1L	MCF7	fusionseeker	5	FALSE	NA	NA
MCF7|KRT18--HSPB1	MCF7	fusionseeker	5	FALSE	NA	NA
MCF7|LHFPL3--EIF4BP3	MCF7	fusionseeker	5	FALSE	NA	NA
MCF7|LINC01399--LL0XNC01-105G4.3	MCF7	fusionseeker	5	FALSE	NA	NA
MCF7|MAGI3--HNRNPA3P6	MCF7	fusionseeker	5	FALSE	NA	NA
MCF7|MAGI3--RALBP1	MCF7	fusionseeker	5	FALSE	NA	NA
MCF7|MKRN1--FTX	MCF7	fusionseeker	5	FALSE	NA	NA
MCF7|MMS19--LDHA	MCF7	fusionseeker	5	FALSE	NA	NA
MCF7|MYL6--ACTB	MCF7	fusionseeker	5	FALSE	NA	NA
MCF7|NBEAL1--EEF1A1	MCF7	fusionseeker	5	FALSE	NA	NA
MCF7|NBPF11--ABHD17A	MCF7	fusionseeker	5	FALSE	NA	NA
MCF7|NDUFB1--CDC25A	MCF7	fusionseeker	5	FALSE	NA	NA
MCF7|NME1--RPL8	MCF7	fusionseeker	5	FALSE	NA	NA
MCF7|OIT3--NPM1	MCF7	fusionseeker	5	FALSE	NA	NA
MCF7|PFDN4--RPL24	MCF7	fusionseeker	5	FALSE	NA	NA
MCF7|PLEKHA7--AQR	MCF7	fusionseeker	5	FALSE	NA	NA
MCF7|PLEKHA7--CAND2	MCF7	fusionseeker	5	FALSE	NA	NA
MCF7|PLEKHA7--TFF1	MCF7	fusionseeker	5	FALSE	NA	NA
MCF7|PTMA--RBFOX2	MCF7	fusionseeker	5	FALSE	NA	NA
MCF7|RAP1B--KCTD2	MCF7	fusionseeker	5	FALSE	NA	NA
MCF7|RBFOX2--CTC-575D19.1	MCF7	fusionseeker	5	FALSE	NA	NA
MCF7|RBM17--DPH6	MCF7	fusionseeker	5	FALSE	NA	NA
MCF7|RP11-150D5.2--RPL18	MCF7	fusionseeker	5	FALSE	NA	NA
MCF7|RP11-255H23.2--GNAS	MCF7	fusionseeker	5	FALSE	NA	NA
MCF7|RP11-326C3.11--RP11-467L13.5	MCF7	fusionseeker	5	FALSE	NA	NA
MCF7|RP11-46D6.1--RAB43	MCF7	fusionseeker	5	FALSE	NA	NA
MCF7|RP11-490G8.1--SLC35F1	MCF7	fusionseeker	5	FALSE	NA	NA
MCF7|RP11-556K13.1--COMMD1	MCF7	fusionseeker	5	FALSE	NA	NA
MCF7|RP11-572P18.1--RPL30	MCF7	fusionseeker	5	FALSE	NA	NA
MCF7|RP5-857K21.4--RP11-750B16.1	MCF7	fusionseeker	5	FALSE	NA	NA
MCF7|RPL13--RBFOX2	MCF7	fusionseeker	5	FALSE	NA	NA
MCF7|RPL13--RP11-3P17.4	MCF7	fusionseeker	5	FALSE	NA	NA
MCF7|RPL13AP5--SHOC2	MCF7	fusionseeker	5	FALSE	NA	NA
MCF7|RPL29--NNT	MCF7	fusionseeker	5	FALSE	NA	NA
MCF7|RPLP1--TFF1	MCF7	fusionseeker	5	FALSE	NA	NA
MCF7|RPLP2--KRT8	MCF7	fusionseeker	5	FALSE	NA	NA
MCF7|RPLP2--PIN4	MCF7	fusionseeker	5	FALSE	NA	NA
MCF7|RPS12--TUBB4B	MCF7	fusionseeker	5	FALSE	NA	NA
MCF7|RPS13--GAPDH	MCF7	fusionseeker	5	FALSE	NA	NA
MCF7|RPS15A--RPL13	MCF7	fusionseeker	5	FALSE	NA	NA
MCF7|RPS2--IL6ST	MCF7	fusionseeker	5	FALSE	NA	NA
MCF7|RPS25--OOEP	MCF7	fusionseeker	5	FALSE	NA	NA
MCF7|RPS27A--ACTB	MCF7	fusionseeker	5	FALSE	NA	NA
MCF7|RPS29--HSP90AB1	MCF7	fusionseeker	5	FALSE	NA	NA
MCF7|RPS3--ALDOA	MCF7	fusionseeker	5	FALSE	NA	NA
MCF7|RPS3--HSPB1	MCF7	fusionseeker	5	FALSE	NA	NA
MCF7|RPS3--POLR2A	MCF7	fusionseeker	5	FALSE	NA	NA
MCF7|RPS3--RPL28	MCF7	fusionseeker	5	FALSE	NA	NA
MCF7|RPS3--RPL30	MCF7	fusionseeker	5	FALSE	NA	NA
MCF7|RPS3--RPL8	MCF7	fusionseeker	5	FALSE	NA	NA
MCF7|RPS3--RPLP0	MCF7	fusionseeker	5	FALSE	NA	NA
MCF7|RPS3--TFF1	MCF7	fusionseeker	5	FALSE	NA	NA
MCF7|RPS3--UBE2Q2P2	MCF7	fusionseeker	5	FALSE	NA	NA
MCF7|RPS4XP8--PIN4	MCF7	fusionseeker	5	FALSE	NA	NA
MCF7|RPS8--GAPDH	MCF7	fusionseeker	5	FALSE	NA	NA
MCF7|SC22CB-1E7.1--ZNF141	MCF7	fusionseeker	5	FALSE	NA	NA
MCF7|SEPT11--TXN	MCF7	fusionseeker	5	FALSE	NA	NA
MCF7|SMOC1--RPL7AP30	MCF7	fusionseeker	5	FALSE	NA	NA
MCF7|SNRPEP4--KDM4C	MCF7	fusionseeker	5	FALSE	NA	NA
MCF7|THSD4--TPST2	MCF7	fusionseeker	5	FALSE	NA	NA
MCF7|TPT1--EEF1A1	MCF7	fusionseeker	5	FALSE	NA	NA
MCF7|TPT1--RPL30	MCF7	fusionseeker	5	FALSE	NA	NA
MCF7|TSPAN9--ACTG1	MCF7	fusionseeker	5	FALSE	NA	NA
MCF7|TXNRD1--HSPB1	MCF7	fusionseeker	5	FALSE	NA	NA
MCF7|TXNRD1--RPL8	MCF7	fusionseeker	5	FALSE	NA	NA
MCF7|UCP2--ANKDD1A	MCF7	fusionseeker	5	FALSE	NA	NA
MCF7|UPF3A--CCDC144CP	MCF7	fusionseeker	5	FALSE	NA	NA
MCF7|USMG5--FTX	MCF7	fusionseeker	5	FALSE	NA	NA
MCF7|VMP1--RPL7A	MCF7	fusionseeker	5	FALSE	NA	NA
A549|LRRN2--PLEKHA6	A549	fusionseeker	4	FALSE	arriba	NA
K562|FAM155A--GPC6	K562	fusionseeker	4	FALSE	arriba	arriba
K562|NFIB--RP11-408A13.2	K562	fusionseeker	4	FALSE	NA	starF
MCF7|ADAT1--TERF2IP	MCF7	fusionseeker	4	FALSE	arriba	NA
MCF7|ATXN7--BCAS3	MCF7	fusionseeker	4	TRUE	starF,arriba	NA
MCF7|BRIP1--TAF4	MCF7	fusionseeker	4	TRUE	starF	NA
MCF7|FNDC3B--PLOD2	MCF7	fusionseeker	4	FALSE	arriba	NA
MCF7|BCAS3--PARD6B	MCF7	fusionseeker	4	FALSE	starF	NA
A549|AC004448.5--INVS	A549	fusionseeker	4	FALSE	NA	NA
A549|AC072062.1--CTC-575D19.1	A549	fusionseeker	4	FALSE	NA	NA
A549|LINC00152--ANAPC1	A549	fusionseeker	4	FALSE	NA	NA
A549|ACTB--NDUFA1	A549	fusionseeker	4	FALSE	NA	NA
A549|ACTG1--ALDH1A1	A549	fusionseeker	4	FALSE	NA	NA
A549|ACTG1--FTL	A549	fusionseeker	4	FALSE	NA	NA
A549|AGPAT3--KCP	A549	fusionseeker	4	FALSE	NA	NA
A549|AGPAT3--PTPRN2	A549	fusionseeker	4	FALSE	NA	NA
A549|AK4--KRT86	A549	fusionseeker	4	FALSE	NA	NA
A549|AKR1B1--RPL8	A549	fusionseeker	4	FALSE	NA	NA
A549|AKR1B10--DDX3X	A549	fusionseeker	4	FALSE	NA	NA
A549|AKR1C2--ATP2A2	A549	fusionseeker	4	FALSE	NA	NA
A549|AKR1C2--FTL	A549	fusionseeker	4	FALSE	NA	NA
A549|ANK2--AC073072.7	A549	fusionseeker	4	FALSE	NA	NA
A549|ANXA2--RPS23	A549	fusionseeker	4	FALSE	NA	NA
A549|ANXA2--TRIM2	A549	fusionseeker	4	FALSE	NA	NA
A549|AP001631.10--PTPRN2	A549	fusionseeker	4	FALSE	NA	NA
A549|ATP5A1--FTL	A549	fusionseeker	4	FALSE	NA	NA
A549|ATP5G3--RPL35	A549	fusionseeker	4	FALSE	NA	NA
A549|AUTS2--TACC1	A549	fusionseeker	4	FALSE	NA	NA
A549|BEST1--FTH1P12	A549	fusionseeker	4	FALSE	NA	NA
A549|BEST1--FTH1P5	A549	fusionseeker	4	FALSE	NA	NA
A549|BEST1--FTL	A549	fusionseeker	4	FALSE	NA	NA
A549|C11orf80--C1QBP	A549	fusionseeker	4	FALSE	NA	NA
A549|CAPN1--RPS16	A549	fusionseeker	4	FALSE	NA	NA
A549|CATSPER2--PDIA3	A549	fusionseeker	4	FALSE	NA	NA
A549|CD5--MLXIP	A549	fusionseeker	4	FALSE	NA	NA
A549|CFAP46--AGPAT3	A549	fusionseeker	4	FALSE	NA	NA
A549|CFAP46--KNDC1	A549	fusionseeker	4	FALSE	NA	NA
A549|CFL1--AC018890.6	A549	fusionseeker	4	FALSE	NA	NA
A549|CMIP--PRDM15	A549	fusionseeker	4	FALSE	NA	NA
A549|COL23A1--PARP4P1	A549	fusionseeker	4	FALSE	NA	NA
A549|COL23A1--PTPRN2	A549	fusionseeker	4	FALSE	NA	NA
A549|COLEC11--TMSB4X	A549	fusionseeker	4	FALSE	NA	NA
A549|CTC-471J1.8--RPL37	A549	fusionseeker	4	FALSE	NA	NA
A549|DAB1--PTPRD	A549	fusionseeker	4	FALSE	NA	NA
A549|DAB1--RPS26P6	A549	fusionseeker	4	FALSE	NA	NA
A549|DACH1--AC018890.6	A549	fusionseeker	4	FALSE	NA	NA
A549|DEK--ACTB	A549	fusionseeker	4	FALSE	NA	NA
A549|DGKI--AC012005.3	A549	fusionseeker	4	FALSE	NA	NA
A549|DNM1L--NAP1L1	A549	fusionseeker	4	FALSE	NA	NA
A549|COPS6--EIF1	A549	fusionseeker	4	FALSE	NA	NA
A549|ELF3--FTL	A549	fusionseeker	4	FALSE	NA	NA
A549|ENO1--FTL	A549	fusionseeker	4	FALSE	NA	NA
A549|EPB41--RPL27	A549	fusionseeker	4	FALSE	NA	NA
A549|EPB42--RPS3AP6	A549	fusionseeker	4	FALSE	NA	NA
A549|FADS2--HSP90AA1	A549	fusionseeker	4	FALSE	NA	NA
A549|FAIM2--KCP	A549	fusionseeker	4	FALSE	NA	NA
A549|FAIM2--PARP4P1	A549	fusionseeker	4	FALSE	NA	NA
A549|FAIM2--PLCXD1	A549	fusionseeker	4	FALSE	NA	NA
A549|FAM19A5--TACC1	A549	fusionseeker	4	FALSE	NA	NA
A549|FTH1--AKR1B10	A549	fusionseeker	4	FALSE	NA	NA
A549|CAPNS1--FTH1	A549	fusionseeker	4	FALSE	NA	NA
A549|FTH1--ECH1	A549	fusionseeker	4	FALSE	NA	NA
A549|FTH1--EEF1A1	A549	fusionseeker	4	FALSE	NA	NA
A549|FTH1--EIF5A	A549	fusionseeker	4	FALSE	NA	NA
A549|BEST1--KRT86	A549	fusionseeker	4	FALSE	NA	NA
A549|FTH1--PPIA	A549	fusionseeker	4	FALSE	NA	NA
A549|BEST1--RPS16	A549	fusionseeker	4	FALSE	NA	NA
A549|FTH1--STEAP1B	A549	fusionseeker	4	FALSE	NA	NA
A549|BEST1--TRABD2A	A549	fusionseeker	4	FALSE	NA	NA
A549|FTH1--YWHAB	A549	fusionseeker	4	FALSE	NA	NA
A549|FTH1P7--SCHLAP1	A549	fusionseeker	4	FALSE	NA	NA
A549|FTL--ACTB	A549	fusionseeker	4	FALSE	NA	NA
A549|FTL--PRDX4	A549	fusionseeker	4	FALSE	NA	NA
A549|FTL--RPL12	A549	fusionseeker	4	FALSE	NA	NA
A549|FTL--RPL35	A549	fusionseeker	4	FALSE	NA	NA
A549|FTL--RPL8	A549	fusionseeker	4	FALSE	NA	NA
A549|FTL--RPN2	A549	fusionseeker	4	FALSE	NA	NA
A549|FTL--RPS23	A549	fusionseeker	4	FALSE	NA	NA
A549|FTL--RPS7	A549	fusionseeker	4	FALSE	NA	NA
A549|FTL--SLC25A5	A549	fusionseeker	4	FALSE	NA	NA
A549|FUS--EIF1	A549	fusionseeker	4	FALSE	NA	NA
A549|GAL3ST2--FAM19A5	A549	fusionseeker	4	FALSE	NA	NA
A549|GAPDH--AC007319.1	A549	fusionseeker	4	FALSE	NA	NA
A549|GAPDH--ANXA2	A549	fusionseeker	4	FALSE	NA	NA
A549|GAPDH--TXNRD1	A549	fusionseeker	4	FALSE	NA	NA
A549|GGACT--PTPRD	A549	fusionseeker	4	FALSE	NA	NA
A549|GIPC1--SNRPG	A549	fusionseeker	4	FALSE	NA	NA
A549|GSTP1--ACTB	A549	fusionseeker	4	FALSE	NA	NA
A549|HN1--RPL28	A549	fusionseeker	4	FALSE	NA	NA
A549|HSPA8--RP11-849F2.7	A549	fusionseeker	4	FALSE	NA	NA
A549|HSPB8--PDAP1	A549	fusionseeker	4	FALSE	NA	NA
A549|ITGB1--ASAP1	A549	fusionseeker	4	FALSE	NA	NA
A549|KPNB1--AKR1B1	A549	fusionseeker	4	FALSE	NA	NA
A549|KRT8--RPS19	A549	fusionseeker	4	FALSE	NA	NA
A549|KRT86--ACTB	A549	fusionseeker	4	FALSE	NA	NA
A549|CLU--KRT7	A549	fusionseeker	4	FALSE	NA	NA
A549|KRT18--RPLP1	A549	fusionseeker	4	FALSE	NA	NA
A549|KRT7--ACTG1	A549	fusionseeker	4	FALSE	NA	NA
A549|KRT86--ERH	A549	fusionseeker	4	FALSE	NA	NA
A549|KRT86--FKBP3	A549	fusionseeker	4	FALSE	NA	NA
A549|KRT7--PFN1	A549	fusionseeker	4	FALSE	NA	NA
A549|KRT86--PSMB6	A549	fusionseeker	4	FALSE	NA	NA
A549|KRT86--RPL6P27	A549	fusionseeker	4	FALSE	NA	NA
A549|KRT86--TMSB4X	A549	fusionseeker	4	FALSE	NA	NA
A549|LDHA--MKKS	A549	fusionseeker	4	FALSE	NA	NA
A549|LDHB--TRABD2A	A549	fusionseeker	4	FALSE	NA	NA
A549|LINC01237--PTPRN2	A549	fusionseeker	4	FALSE	NA	NA
A549|LINC01378--NT5C3A	A549	fusionseeker	4	FALSE	NA	NA
A549|LYPD8--CMIP	A549	fusionseeker	4	FALSE	NA	NA
A549|MALL--AKR1B10	A549	fusionseeker	4	FALSE	NA	NA
A549|MLXIP--PTPRN2	A549	fusionseeker	4	FALSE	NA	NA
A549|PRDX1--ACTG1	A549	fusionseeker	4	FALSE	NA	NA
A549|MMP23B--SOD1	A549	fusionseeker	4	FALSE	NA	NA
A549|NCEH1--MUC13	A549	fusionseeker	4	FALSE	NA	NA
A549|MXRA7--PSMD14	A549	fusionseeker	4	FALSE	NA	NA
A549|MYO5A--EEF1B2	A549	fusionseeker	4	FALSE	NA	NA
A549|NABP2--FIP1L1	A549	fusionseeker	4	FALSE	NA	NA
A549|NDUFA10--KCP	A549	fusionseeker	4	FALSE	NA	NA
A549|NKIRAS1--CORIN	A549	fusionseeker	4	FALSE	NA	NA
A549|NPM1--PIN4	A549	fusionseeker	4	FALSE	NA	NA
A549|NQO1--RPS18	A549	fusionseeker	4	FALSE	NA	NA
A549|NUTF2--CEP112	A549	fusionseeker	4	FALSE	NA	NA
A549|OIT3--NPM1	A549	fusionseeker	4	FALSE	NA	NA
A549|PARD3--FTL	A549	fusionseeker	4	FALSE	NA	NA
A549|PGD--RPS16	A549	fusionseeker	4	FALSE	NA	NA
A549|PRDM15--GRM4	A549	fusionseeker	4	FALSE	NA	NA
A549|PRDM15--PTPRN2	A549	fusionseeker	4	FALSE	NA	NA
A549|PRDX1--FTH1	A549	fusionseeker	4	FALSE	NA	NA
A549|PSAP--RPL18	A549	fusionseeker	4	FALSE	NA	NA
A549|PTPRN2--STARD8	A549	fusionseeker	4	FALSE	NA	NA
A549|RAN--COTL1	A549	fusionseeker	4	FALSE	NA	NA
A549|RAP1B--SV2C	A549	fusionseeker	4	FALSE	NA	NA
A549|RP11-187O7.3--RPSA	A549	fusionseeker	4	FALSE	NA	NA
A549|RP11-255H23.2--RP6-105D16.1	A549	fusionseeker	4	FALSE	NA	NA
A549|RP11-3P17.4--RPL7A	A549	fusionseeker	4	FALSE	NA	NA
A549|RP11-432J24.5--CFAP46	A549	fusionseeker	4	FALSE	NA	NA
A549|RP11-436I9.6--BTG1	A549	fusionseeker	4	FALSE	NA	NA
A549|ARPC3--STAU1	A549	fusionseeker	4	FALSE	NA	NA
A549|RP11-685M7.5--RPL31	A549	fusionseeker	4	FALSE	NA	NA
A549|RP11-81K2.1--EIF4E	A549	fusionseeker	4	FALSE	NA	NA
A549|RP11-968A15.8--HNRNPA1P4	A549	fusionseeker	4	FALSE	NA	NA
A549|RPL10A--ALDH1A1	A549	fusionseeker	4	FALSE	NA	NA
A549|RPL10A--RP11-1134I14.2	A549	fusionseeker	4	FALSE	NA	NA
A549|RPL19--FTL	A549	fusionseeker	4	FALSE	NA	NA
A549|RPL23--FTL	A549	fusionseeker	4	FALSE	NA	NA
A549|RPL6P27--TRABD2A	A549	fusionseeker	4	FALSE	NA	NA
A549|RPLP0--RPS19	A549	fusionseeker	4	FALSE	NA	NA
A549|RPLP1--ATOX1	A549	fusionseeker	4	FALSE	NA	NA
A549|RPLP1--RPS16	A549	fusionseeker	4	FALSE	NA	NA
A549|RPS10-NUDT3--RP11-274B21.1	A549	fusionseeker	4	FALSE	NA	NA
A549|RPS10--RP11-274B21.1	A549	fusionseeker	4	FALSE	NA	NA
A549|RPS11--MZT2B	A549	fusionseeker	4	FALSE	NA	NA
A549|RPS16--BTF3	A549	fusionseeker	4	FALSE	NA	NA
A549|RPS16--TXN	A549	fusionseeker	4	FALSE	NA	NA
A549|RPS17--ALDH1A1	A549	fusionseeker	4	FALSE	NA	NA
A549|RPS19--OOEP	A549	fusionseeker	4	FALSE	NA	NA
A549|RPS19--RPL13A	A549	fusionseeker	4	FALSE	NA	NA
A549|RPS19--TRABD2A	A549	fusionseeker	4	FALSE	NA	NA
A549|RPS2--INVS	A549	fusionseeker	4	FALSE	NA	NA
A549|RPS24--RPL8	A549	fusionseeker	4	FALSE	NA	NA
A549|RPS24--TXNDC17	A549	fusionseeker	4	FALSE	NA	NA
A549|RPS27--PPP1R12B	A549	fusionseeker	4	FALSE	NA	NA
A549|RPS27A--G6PD	A549	fusionseeker	4	FALSE	NA	NA
A549|RPS3--ALDH1A1	A549	fusionseeker	4	FALSE	NA	NA
A549|RPS3--GAPDH	A549	fusionseeker	4	FALSE	NA	NA
A549|S100A6--KRT7	A549	fusionseeker	4	FALSE	NA	NA
A549|CPSF4--SARNP	A549	fusionseeker	4	FALSE	NA	NA
A549|SCHLAP1--FTH1P10	A549	fusionseeker	4	FALSE	NA	NA
A549|SLC25A3--LGALS1	A549	fusionseeker	4	FALSE	NA	NA
A549|SLC2A4RG--ZBTB46	A549	fusionseeker	4	FALSE	NA	NA
A549|SMCO4--SRP14	A549	fusionseeker	4	FALSE	NA	NA
A549|SMOC1--RPL7AP30	A549	fusionseeker	4	FALSE	NA	NA
A549|SNRPE--KDM4C	A549	fusionseeker	4	FALSE	NA	NA
A549|NAB2--STAT6	A549	fusionseeker	4	FALSE	NA	NA
A549|CKS1B--SVIL	A549	fusionseeker	4	FALSE	NA	NA
A549|TBC1D28--PAIP1	A549	fusionseeker	4	FALSE	NA	NA
A549|TMEM183A--PFN2	A549	fusionseeker	4	FALSE	NA	NA
A549|TMPO--ACTB	A549	fusionseeker	4	FALSE	NA	NA
A549|TPT1--CLU	A549	fusionseeker	4	FALSE	NA	NA
A549|TRABD2A--NPM1	A549	fusionseeker	4	FALSE	NA	NA
A549|TRABD2A--SETD4	A549	fusionseeker	4	FALSE	NA	NA
A549|TRIM16L--AKR1B10	A549	fusionseeker	4	FALSE	NA	NA
A549|TSPAN9--GNGT1	A549	fusionseeker	4	FALSE	NA	NA
A549|TUBA1B--FTL	A549	fusionseeker	4	FALSE	NA	NA
A549|UBE2I--RPL8	A549	fusionseeker	4	FALSE	NA	NA
A549|UPF3A--CCDC144A	A549	fusionseeker	4	FALSE	NA	NA
A549|UQCRB--LINC01420	A549	fusionseeker	4	FALSE	NA	NA
A549|WBP2--FTL	A549	fusionseeker	4	FALSE	NA	NA
A549|YWHAZ--CASK	A549	fusionseeker	4	FALSE	NA	NA
A549|ZNF286B--RPL28	A549	fusionseeker	4	FALSE	NA	NA
A549|ZNF609--ANK2	A549	fusionseeker	4	FALSE	NA	NA
K562|ABCG1--FAM19A5	K562	fusionseeker	4	FALSE	NA	NA
K562|ABHD2--VAPA	K562	fusionseeker	4	FALSE	NA	NA
K562|AC092670.1--IL6ST	K562	fusionseeker	4	FALSE	NA	NA
K562|AEBP2--EEF1A1	K562	fusionseeker	4	FALSE	NA	NA
K562|AEBP2--PDCD5	K562	fusionseeker	4	FALSE	NA	NA
K562|AMBRA1--MED30	K562	fusionseeker	4	FALSE	NA	NA
K562|AMBRA1--RPS10P3	K562	fusionseeker	4	FALSE	NA	NA
K562|ANO8--GTPBP3	K562	fusionseeker	4	FALSE	NA	NA
K562|ATG10--PPIA	K562	fusionseeker	4	FALSE	NA	NA
K562|ATP5B--VWA3B	K562	fusionseeker	4	FALSE	NA	NA
K562|ATP5G3--RPS18	K562	fusionseeker	4	FALSE	NA	NA
K562|ATPIF1--RPS13	K562	fusionseeker	4	FALSE	NA	NA
K562|BEST1--FTH1P5	K562	fusionseeker	4	FALSE	NA	NA
K562|C18orf32--LRCH3	K562	fusionseeker	4	FALSE	NA	NA
K562|CD163L1--MPHOSPH8	K562	fusionseeker	4	FALSE	NA	NA
K562|CD58--NAP1L4	K562	fusionseeker	4	FALSE	NA	NA
K562|CD81-AS1--RPL26L1	K562	fusionseeker	4	FALSE	NA	NA
K562|CFAP46--AUTS2	K562	fusionseeker	4	FALSE	NA	NA
K562|COX20--TET1	K562	fusionseeker	4	FALSE	NA	NA
K562|CTD-2192J16.15--AC072062.1	K562	fusionseeker	4	FALSE	NA	NA
K562|EEF1A1P12--STEAP1B	K562	fusionseeker	4	FALSE	NA	NA
K562|EEF1A1P24--STEAP1B	K562	fusionseeker	4	FALSE	NA	NA
K562|EIF1--ASAP2	K562	fusionseeker	4	FALSE	NA	NA
K562|ERP29--ZFP64	K562	fusionseeker	4	FALSE	NA	NA
K562|FAM172A--CLVS1	K562	fusionseeker	4	FALSE	NA	NA
K562|FAM174B--H2AFV	K562	fusionseeker	4	FALSE	NA	NA
K562|FNDC3A--COX7C	K562	fusionseeker	4	FALSE	NA	NA
K562|FRMD5--PIN4	K562	fusionseeker	4	FALSE	NA	NA
K562|FTL--KCP	K562	fusionseeker	4	FALSE	NA	NA
K562|FTL--RPS23P8	K562	fusionseeker	4	FALSE	NA	NA
K562|GPN3--RP11-112J1.1	K562	fusionseeker	4	FALSE	NA	NA
K562|GRB14--EIF3E	K562	fusionseeker	4	FALSE	NA	NA
K562|H3F3A--MGST2	K562	fusionseeker	4	FALSE	NA	NA
K562|HBG2--GYPC	K562	fusionseeker	4	FALSE	NA	NA
K562|HBG2--MALAT1	K562	fusionseeker	4	FALSE	NA	NA
K562|HBG2--RP11-179A16.1	K562	fusionseeker	4	FALSE	NA	NA
K562|HBG2--RP11-255H23.2	K562	fusionseeker	4	FALSE	NA	NA
K562|HBG2--RP11-3P17.4	K562	fusionseeker	4	FALSE	NA	NA
K562|HBG2--RPL19	K562	fusionseeker	4	FALSE	NA	NA
K562|HBG2--RPL27	K562	fusionseeker	4	FALSE	NA	NA
K562|HBG2--RPL27A	K562	fusionseeker	4	FALSE	NA	NA
K562|HBG2--RPL28	K562	fusionseeker	4	FALSE	NA	NA
K562|HBG2--RPL37	K562	fusionseeker	4	FALSE	NA	NA
K562|HBG2--RPS12	K562	fusionseeker	4	FALSE	NA	NA
K562|HBG2--RPS17	K562	fusionseeker	4	FALSE	NA	NA
K562|HBG2--RPS3A	K562	fusionseeker	4	FALSE	NA	NA
K562|HBG2--TRABD2A	K562	fusionseeker	4	FALSE	NA	NA
K562|HBG2--UBE2Q2P2	K562	fusionseeker	4	FALSE	NA	NA
K562|HBG2--AC007969.5	K562	fusionseeker	4	FALSE	NA	NA
K562|HBG1--ALDOA	K562	fusionseeker	4	FALSE	NA	NA
K562|HBG2--COX6B1	K562	fusionseeker	4	FALSE	NA	NA
K562|HBG2--CTC-575D19.1	K562	fusionseeker	4	FALSE	NA	NA
K562|HBG2--ELAVL1	K562	fusionseeker	4	FALSE	NA	NA
K562|HBG1--GYPC	K562	fusionseeker	4	FALSE	NA	NA
K562|HBG1--RPL10A	K562	fusionseeker	4	FALSE	NA	NA
K562|HBG1--RPL12	K562	fusionseeker	4	FALSE	NA	NA
K562|HBG1--RPL13A	K562	fusionseeker	4	FALSE	NA	NA
K562|HBG1--RPL19	K562	fusionseeker	4	FALSE	NA	NA
K562|HBG1--RPL23A	K562	fusionseeker	4	FALSE	NA	NA
K562|HBG2--RPL29	K562	fusionseeker	4	FALSE	NA	NA
K562|HBG1--RPL35	K562	fusionseeker	4	FALSE	NA	NA
K562|HBG1--RPL4	K562	fusionseeker	4	FALSE	NA	NA
K562|HBG1--RPS2	K562	fusionseeker	4	FALSE	NA	NA
K562|HBG2--SUZ12P1	K562	fusionseeker	4	FALSE	NA	NA
K562|HBG2--VAPB	K562	fusionseeker	4	FALSE	NA	NA
K562|RPL41--HERC2	K562	fusionseeker	4	FALSE	NA	NA
K562|HSF2BP--AUTS2	K562	fusionseeker	4	FALSE	NA	NA
K562|IL6ST--RPS20	K562	fusionseeker	4	FALSE	NA	NA
K562|IQCG--RPS18	K562	fusionseeker	4	FALSE	NA	NA
K562|KIZ--LEPROTL1	K562	fusionseeker	4	FALSE	NA	NA
K562|KIZ--RP3-340B19.2	K562	fusionseeker	4	FALSE	NA	NA
K562|LAMA1--HSP90AB1	K562	fusionseeker	4	FALSE	NA	NA
K562|MALAT1--IK	K562	fusionseeker	4	FALSE	NA	NA
K562|MALAT1--RPL29	K562	fusionseeker	4	FALSE	NA	NA
K562|MALAT1--RPS6	K562	fusionseeker	4	FALSE	NA	NA
K562|MLXIP--NDUFA10	K562	fusionseeker	4	FALSE	NA	NA
K562|MTCH2--MED15	K562	fusionseeker	4	FALSE	NA	NA
K562|NDUFA10--AC006372.4	K562	fusionseeker	4	FALSE	NA	NA
K562|NDUFA10--PTPRN2	K562	fusionseeker	4	FALSE	NA	NA
K562|NKIRAS1--EEF1A1	K562	fusionseeker	4	FALSE	NA	NA
K562|NPIPA3--NOMO2	K562	fusionseeker	4	FALSE	NA	NA
K562|OOEP--RPS12	K562	fusionseeker	4	FALSE	NA	NA
K562|OPHN1--PGK1	K562	fusionseeker	4	FALSE	NA	NA
K562|PIGK--HBG2	K562	fusionseeker	4	FALSE	NA	NA
K562|PLEKHA7--FTL	K562	fusionseeker	4	FALSE	NA	NA
K562|PTTG1--C8orf44-SGK3	K562	fusionseeker	4	FALSE	NA	NA
K562|RAP1B--KCTD2	K562	fusionseeker	4	FALSE	NA	NA
K562|RP11-179A16.1--PMPCB	K562	fusionseeker	4	FALSE	NA	NA
K562|RP11-189B4.7--COX17	K562	fusionseeker	4	FALSE	NA	NA
K562|RP11-255H23.2--RPSAP8	K562	fusionseeker	4	FALSE	NA	NA
K562|RP11-301G19.1--SPTLC1	K562	fusionseeker	4	FALSE	NA	NA
K562|RP11-331N16.1--IL6ST	K562	fusionseeker	4	FALSE	NA	NA
K562|RP11-563D10.1--EEF1A1	K562	fusionseeker	4	FALSE	NA	NA
K562|RP11-572P18.1--HBG2	K562	fusionseeker	4	FALSE	NA	NA
K562|RP11-849F2.5--RPL26P19	K562	fusionseeker	4	FALSE	NA	NA
K562|RP11-849F2.7--RPS12	K562	fusionseeker	4	FALSE	NA	NA
K562|RP11-968A15.8--HNRNPA1P4	K562	fusionseeker	4	FALSE	NA	NA
K562|RPL11--HBG2	K562	fusionseeker	4	FALSE	NA	NA
K562|RPL11--RPS12	K562	fusionseeker	4	FALSE	NA	NA
[truncated: 20,741 more rows]
