# Supplementary material for: Accurate fusion transcript identification from long- and short-read isoform sequencing at bulk or single-cell resolution
Source: Genome Res. 2025 Apr;35(4):967–86. doi: 10.1101/gr.279200.124 (PMC12047241; doi:10.1101/gr.279200.124)
Supplement: Supplement 8 [file Supplemental_Table_S7.xlsx]

## Sheet: Table_S7-scHGSOC_fusions_of_int
# Table S7: Fusions identified of interest for each of the HGSOC. Tumor samples
# frac_fusion_cells: fraction of cells identified with corresponding fusion that were found in this corresponding cell type.
# Arriba, CTAT-LR-Fusion, FusionInspector, and STAR-Fusion columns: counts of cell identified with the corresponding fusion by the corresponding fusion detection method.
# annots: fusion annotations from FusionAnnotator including annotations for the reciprocal fusion annotation (recip)
sample	FusionName	celltype_final	tot_cells_w_fusion	frac_fusion_cells	LeftBreakpoint	RightBreakpoint	Arriba	CTAT-LR-Fusion	FusionInspector	STAR-Fusion	annots
Patient1_Tum	SMG7--CH507-513H4.1	HGSOC	26	1	chr1:183472649:+	chr21:8222961:+	NA	26	NA	NA	SMG7--CH507-513H4.1:INTERCHROMOSOMAL[chr1--chr21];;(recip)CH507-513H4.1--SMG7:INTERCHROMOSOMAL[chr21--chr1]
Patient1_Tum	RAPGEF5--AGMO	HGSOC	6	1	chr7:22125604:-	chr7:15201359:-	NA	5	3	1	RAPGEF5--AGMO:INTRACHROMOSOMAL[chr7:6.56Mb];;(recip)AGMO--RAPGEF5:INTRACHROMOSOMAL[chr7:6.56Mb]
Patient1_Tum	GS1-279B7.2--GNG4	HGSOC	5	1	chr1:235654008:-	chr1:235583848:-	NA	5	NA	NA	GS1-279B7.2--GNG4:INTRACHROMOSOMAL[chr1:50.23Mb];;(recip)GNG4--GS1-279B7.2:INTRACHROMOSOMAL[chr1:50.23Mb]
Patient1_Tum	NTN1--CDRT15P2	HGSOC	5	1	chr17:9023391:+	chr17:15765108:+	NA	5	NA	NA	NTN1--CDRT15P2:INTRACHROMOSOMAL[chr17:6.52Mb];;(recip)CDRT15P2--NTN1:INTRACHROMOSOMAL[chr17:6.52Mb]
Patient2_Tum	IGF2BP2--TESPA1	HGSOC	176	0.988764	chr3:185696612:-	chr12:54950390:-	92	174	138	16	IGF2BP2--TESPA1:INTERCHROMOSOMAL[chr3--chr12];;(recip)TESPA1--IGF2BP2:INTERCHROMOSOMAL[chr12--chr3]
Patient2_Tum	IGF2BP2--TESPA1	HGSOC	176	0.988764	chr3:185823153:-	chr12:54950390:-	6	52	13	5	IGF2BP2--TESPA1:INTERCHROMOSOMAL[chr3--chr12];;(recip)TESPA1--IGF2BP2:INTERCHROMOSOMAL[chr12--chr3]
Patient2_Tum	IGF2BP2--TESPA1	HGSOC	176	0.988764	chr3:185824783:-	chr12:54950390:-	4	17	6	5	IGF2BP2--TESPA1:INTERCHROMOSOMAL[chr3--chr12];;(recip)TESPA1--IGF2BP2:INTERCHROMOSOMAL[chr12--chr3]
Patient2_Tum	IGF2BP2--TESPA1	HGSOC	176	0.988764	chr3:185698299:-	chr12:54950390:-	1	5	1	1	IGF2BP2--TESPA1:INTERCHROMOSOMAL[chr3--chr12];;(recip)TESPA1--IGF2BP2:INTERCHROMOSOMAL[chr12--chr3]
Patient2_Tum	IGF2BP2--TESPA1	HGSOC	176	0.988764	chr3:185696609:-	chr12:54950390:-	NA	NA	3	NA	IGF2BP2--TESPA1:INTERCHROMOSOMAL[chr3--chr12];;(recip)TESPA1--IGF2BP2:INTERCHROMOSOMAL[chr12--chr3]
Patient2_Tum	PSMB7--SCAI	HGSOC	52	0.981132	chr9:124405317:-	chr9:125056007:-	2	28	2	2	PSMB7--SCAI:INTRACHROMOSOMAL[chr9:0.53Mb];;(recip)SCAI--PSMB7:[Klijn_CellLines,DepMap2023];INTRACHROMOSOMAL[chr9:0.53Mb]
Patient2_Tum	PSMB7--SCAI	HGSOC	52	0.981132	chr9:124405317:-	chr9:125066058:-	NA	26	3	2	PSMB7--SCAI:INTRACHROMOSOMAL[chr9:0.53Mb];;(recip)SCAI--PSMB7:[Klijn_CellLines,DepMap2023];INTRACHROMOSOMAL[chr9:0.53Mb]
Patient2_Tum	PSMB7--SCAI	HGSOC	52	0.981132	chr9:124412352:-	chr9:125056007:-	NA	9	2	1	PSMB7--SCAI:INTRACHROMOSOMAL[chr9:0.53Mb];;(recip)SCAI--PSMB7:[Klijn_CellLines,DepMap2023];INTRACHROMOSOMAL[chr9:0.53Mb]
Patient2_Tum	PSMB7--SCAI	HGSOC	52	0.981132	chr9:124405317:-	chr9:125029739:-	NA	2	NA	NA	PSMB7--SCAI:INTRACHROMOSOMAL[chr9:0.53Mb];;(recip)SCAI--PSMB7:[Klijn_CellLines,DepMap2023];INTRACHROMOSOMAL[chr9:0.53Mb]
Patient2_Tum	SRSF7--DHX57	HGSOC	36	0.972973	chr2:38746144:-	chr2:38815655:-	NA	35	3	2	SRSF7--DHX57:[DepMap2023,CCLE_StarF2019];INTRACHROMOSOMAL[chr2:0.05Mb];LOCAL_REARRANGEMENT:-:[46235];;(recip)DHX57--SRSF7:INTRACHROMOSOMAL[chr2:0.05Mb];NEIGHBORS[46235]
Patient2_Tum	SRSF7--DHX57	HGSOC	36	0.972973	chr2:38746144:-	chr2:38816612:-	NA	2	NA	NA	SRSF7--DHX57:[DepMap2023,CCLE_StarF2019];INTRACHROMOSOMAL[chr2:0.05Mb];LOCAL_REARRANGEMENT:-:[46235];;(recip)DHX57--SRSF7:INTRACHROMOSOMAL[chr2:0.05Mb];NEIGHBORS[46235]
Patient2_Tum	MIR4435-1HG--DARS	HGSOC	21	1	chr2:111494885:-	chr2:135943480:-	NA	20	1	NA	MIR4435-1HG--DARS:INTRACHROMOSOMAL[chr2:24.41Mb];;(recip)DARS--MIR4435-1HG:INTRACHROMOSOMAL[chr2:24.41Mb]
Patient2_Tum	MIR4435-1HG--DARS	HGSOC	21	1	chr2:111494881:-	chr2:135911405:-	NA	1	NA	NA	MIR4435-1HG--DARS:INTRACHROMOSOMAL[chr2:24.41Mb];;(recip)DARS--MIR4435-1HG:INTRACHROMOSOMAL[chr2:24.41Mb]
Patient2_Tum	MIR4435-1HG--DARS	HGSOC	21	1	chr2:111494885:-	chr2:135933990:-	NA	1	NA	NA	MIR4435-1HG--DARS:INTRACHROMOSOMAL[chr2:24.41Mb];;(recip)DARS--MIR4435-1HG:INTRACHROMOSOMAL[chr2:24.41Mb]
Patient2_Tum	SPATS2--TRA2B	HGSOC	21	1	chr12:49461037:+	chr3:185931852:-	NA	21	10	6	SPATS2--TRA2B:INTERCHROMOSOMAL[chr12--chr3];;(recip)TRA2B--SPATS2:INTERCHROMOSOMAL[chr3--chr12]
Patient2_Tum	SPATS2--TRA2B	HGSOC	21	1	chr3:185931852:-	chr12:49461037:+	5	NA	NA	NA	SPATS2--TRA2B:INTERCHROMOSOMAL[chr12--chr3];;(recip)TRA2B--SPATS2:INTERCHROMOSOMAL[chr3--chr12]
Patient2_Tum	CBL--KMT2A	HGSOC	16	1	chr11:119232695:+	chr11:118480174:+	NA	15	NA	NA	CBL--KMT2A:[CBL:FoundationOne_panel,CBL:ArcherDX_panel,CBL:Oncogene];[KMT2A:Oncogene,KMT2A:FoundationOne_panel,KMT2A:ArcherDX_panel];INTRACHROMOSOMAL[chr11:0.68Mb];;(recip)KMT2A--CBL:[KMT2A:Oncogene,KMT2A:FoundationOne_panel,KMT2A:ArcherDX_panel];[CBL:FoundationOne_panel,CBL:ArcherDX_panel,CBL:Oncogene];[Mitelman,ChimerKB,Cosmic];INTRACHROMOSOMAL[chr11:0.68Mb]
Patient2_Tum	CBL--KMT2A	HGSOC	16	1	chr11:119232695:+	chr11:118481715:+	NA	1	NA	NA	CBL--KMT2A:[CBL:FoundationOne_panel,CBL:ArcherDX_panel,CBL:Oncogene];[KMT2A:Oncogene,KMT2A:FoundationOne_panel,KMT2A:ArcherDX_panel];INTRACHROMOSOMAL[chr11:0.68Mb];;(recip)KMT2A--CBL:[KMT2A:Oncogene,KMT2A:FoundationOne_panel,KMT2A:ArcherDX_panel];[CBL:FoundationOne_panel,CBL:ArcherDX_panel,CBL:Oncogene];[Mitelman,ChimerKB,Cosmic];INTRACHROMOSOMAL[chr11:0.68Mb]
Patient2_Tum	PLXNB2--DENND6B	HGSOC	14	1	chr22:50294719:-	chr22:50319003:-	NA	9	NA	NA	PLXNB2--DENND6B:[DepMap2023,TCGA_StarF2019,CCLE_StarF2019];INTRACHROMOSOMAL[chr22:0.00Mb];LOCAL_REARRANGEMENT:-:[1403];;(recip)DENND6B--PLXNB2:INTRACHROMOSOMAL[chr22:0.00Mb];NEIGHBORS[1403]
Patient2_Tum	PLXNB2--DENND6B	HGSOC	14	1	chr22:50294726:-	chr22:50319003:-	NA	6	NA	NA	PLXNB2--DENND6B:[DepMap2023,TCGA_StarF2019,CCLE_StarF2019];INTRACHROMOSOMAL[chr22:0.00Mb];LOCAL_REARRANGEMENT:-:[1403];;(recip)DENND6B--PLXNB2:INTRACHROMOSOMAL[chr22:0.00Mb];NEIGHBORS[1403]
Patient2_Tum	RP11-96H19.1--RP11-446N19.1	HGSOC	14	1	chr12:46387972:+	chr12:46652390:+	NA	13	8	NA	RP11-96H19.1--RP11-446N19.1:[DepMap2023];INTRACHROMOSOMAL[chr12:0.12Mb];;(recip)RP11-446N19.1--RP11-96H19.1:INTRACHROMOSOMAL[chr12:0.12Mb]
Patient2_Tum	RMND5B--NHP2	HGSOC	12	0.857143	chr5:178149680:+	chr5:178153830:-	NA	2	NA	NA	RMND5B--NHP2:[RMND5B:Oncogene];INTRACHROMOSOMAL[chr5:0.00Mb];NEIGHBORS_OVERLAP:+:-:[1105];;(recip)NHP2--RMND5B:[RMND5B:Oncogene];INTRACHROMOSOMAL[chr5:0.00Mb];NEIGHBORS_OVERLAP:-:+:[1105]
Patient2_Tum	RMND5B--NHP2	HGSOC	12	0.857143	chr5:178149688:+	chr5:178153828:-	NA	1	NA	NA	RMND5B--NHP2:[RMND5B:Oncogene];INTRACHROMOSOMAL[chr5:0.00Mb];NEIGHBORS_OVERLAP:+:-:[1105];;(recip)NHP2--RMND5B:[RMND5B:Oncogene];INTRACHROMOSOMAL[chr5:0.00Mb];NEIGHBORS_OVERLAP:-:+:[1105]
Patient2_Tum	RMND5B--NHP2	HGSOC	12	0.857143	chr5:178149655:+	chr5:178149642:-	NA	NA	10	NA	RMND5B--NHP2:[RMND5B:Oncogene];INTRACHROMOSOMAL[chr5:0.00Mb];NEIGHBORS_OVERLAP:+:-:[1105];;(recip)NHP2--RMND5B:[RMND5B:Oncogene];INTRACHROMOSOMAL[chr5:0.00Mb];NEIGHBORS_OVERLAP:-:+:[1105]
Patient2_Tum	DEK--CASC17	HGSOC	11	1	chr6:18249578:-	chr17:71185655:-	NA	11	NA	NA	DEK--CASC17:[DEK:Oncogene];INTERCHROMOSOMAL[chr6--chr17];;(recip)CASC17--DEK:[DEK:Oncogene];INTERCHROMOSOMAL[chr17--chr6]
Patient2_Tum	SLC7A6--ELMO3	HGSOC	11	1	chr16:68275249:+	chr16:67202397:+	NA	6	NA	NA	SLC7A6--ELMO3:INTRACHROMOSOMAL[chr16:1.06Mb];;(recip)ELMO3--SLC7A6:INTRACHROMOSOMAL[chr16:1.06Mb]
Patient2_Tum	SLC7A6--ELMO3	HGSOC	11	1	chr16:68275249:+	chr16:67202176:+	NA	2	NA	NA	SLC7A6--ELMO3:INTRACHROMOSOMAL[chr16:1.06Mb];;(recip)ELMO3--SLC7A6:INTRACHROMOSOMAL[chr16:1.06Mb]
Patient2_Tum	SLC7A6--ELMO3	HGSOC	11	1	chr16:68266721:+	chr16:67202176:+	NA	1	NA	NA	SLC7A6--ELMO3:INTRACHROMOSOMAL[chr16:1.06Mb];;(recip)ELMO3--SLC7A6:INTRACHROMOSOMAL[chr16:1.06Mb]
Patient2_Tum	SLC7A6--ELMO3	HGSOC	11	1	chr16:68266721:+	chr16:67202397:+	NA	1	NA	NA	SLC7A6--ELMO3:INTRACHROMOSOMAL[chr16:1.06Mb];;(recip)ELMO3--SLC7A6:INTRACHROMOSOMAL[chr16:1.06Mb]
Patient2_Tum	SLC7A6--ELMO3	HGSOC	11	1	chr16:68273904:+	chr16:67203808:+	NA	1	NA	NA	SLC7A6--ELMO3:INTRACHROMOSOMAL[chr16:1.06Mb];;(recip)ELMO3--SLC7A6:INTRACHROMOSOMAL[chr16:1.06Mb]
Patient2_Tum	RP11-855A2.2--BPTF	HGSOC	10	1	chr17:67822409:+	chr17:67945409:+	NA	10	NA	NA	RP11-855A2.2--BPTF:INTRACHROMOSOMAL[chr17:0.00Mb];NEIGHBORS_OVERLAP:+:+:[2138];;(recip)BPTF--RP11-855A2.2:INTRACHROMOSOMAL[chr17:0.00Mb];NEIGHBORS_OVERLAP:+:+:[2138]
Patient2_Tum	CTD-2008L17.1--RP11-456O19.2	HGSOC	8	1	chr18:55893442:+	chr18:56096075:+	NA	5	6	4	CTD-2008L17.1--RP11-456O19.2:[DepMap2023];INTRACHROMOSOMAL[chr18:0.02Mb];NEIGHBORS[18613];;(recip)RP11-456O19.2--CTD-2008L17.1:INTRACHROMOSOMAL[chr18:0.02Mb];LOCAL_REARRANGEMENT:+:[18613]
Patient2_Tum	CTD-2008L17.1--RP11-456O19.2	HGSOC	8	1	chr18:55893442:+	chr18:56050080:+	NA	NA	4	1	CTD-2008L17.1--RP11-456O19.2:[DepMap2023];INTRACHROMOSOMAL[chr18:0.02Mb];NEIGHBORS[18613];;(recip)RP11-456O19.2--CTD-2008L17.1:INTRACHROMOSOMAL[chr18:0.02Mb];LOCAL_REARRANGEMENT:+:[18613]
Patient2_Tum	TRIM23--RP11-454P21.1	HGSOC	8	1	chr5:65596421:-	chr5:17769909:+	NA	7	NA	NA	TRIM23--RP11-454P21.1:INTRACHROMOSOMAL[chr5:47.63Mb];;(recip)RP11-454P21.1--TRIM23:INTRACHROMOSOMAL[chr5:47.63Mb]
Patient2_Tum	TRIM23--RP11-454P21.1	HGSOC	8	1	chr5:65604911:-	chr5:17852606:+	NA	1	NA	NA	TRIM23--RP11-454P21.1:INTRACHROMOSOMAL[chr5:47.63Mb];;(recip)RP11-454P21.1--TRIM23:INTRACHROMOSOMAL[chr5:47.63Mb]
Patient2_Tum	WDR59--AARS	HGSOC	8	1	chr16:74903947:-	chr16:70271972:-	NA	8	4	4	WDR59--AARS:INTRACHROMOSOMAL[chr16:4.58Mb];;(recip)AARS--WDR59:INTRACHROMOSOMAL[chr16:4.58Mb]
Patient2_Tum	DUXAP10--LA16c-60G3.6	HGSOC	7	1	chr14:19062466:+	chr22:15557275:+	NA	7	NA	NA	DUXAP10--LA16c-60G3.6:INTERCHROMOSOMAL[chr14--chr22];;(recip)LA16c-60G3.6--DUXAP10:INTERCHROMOSOMAL[chr22--chr14]
Patient2_Tum	MIF-AS1--MIF	HGSOC	7	0.875	chr22:23895073:-	chr22:23895101:+	NA	NA	7	NA	MIF-AS1--MIF:[MIF:Oncogene];INTRACHROMOSOMAL[chr22:0.00Mb];NEIGHBORS_OVERLAP:-:+:[801];;(recip)MIF--MIF-AS1:[MIF:Oncogene];INTRACHROMOSOMAL[chr22:0.00Mb];NEIGHBORS_OVERLAP:+:-:[801]
Patient2_Tum	SMC1B--TBC1D22A	HGSOC	6	1	chr22:45409875:-	chr22:46797620:+	6	NA	NA	NA	NA
Patient2_Tum	TBL1XR1--TBL1XR1(22663),LINC00501(43779)	HGSOC	6	1	chr3:177197121:-	chr3:177250663:.	6	NA	NA	NA	NA
Patient2_Tum	DEK--RNU7-155P(196402),AC118653.2(101718)	HGSOC	5	1	chr6:18249651:-	chr17:71494620:.	5	NA	NA	NA	NA
Patient3_Tum	CBLC--CTC-232P5.1	HGSOC	14	0.875	chr19:44784401:+	chr19:6012120:+	NA	11	6	4	CBLC--CTC-232P5.1:[CBLC:Oncogene];INTRACHROMOSOMAL[chr19:38.76Mb];;(recip)CTC-232P5.1--CBLC:[CBLC:Oncogene];INTRACHROMOSOMAL[chr19:38.76Mb]
Patient3_Tum	CBLC--CTC-232P5.1	HGSOC	14	0.875	chr19:44784417:+	chr19:6012120:+	NA	8	3	3	CBLC--CTC-232P5.1:[CBLC:Oncogene];INTRACHROMOSOMAL[chr19:38.76Mb];;(recip)CTC-232P5.1--CBLC:[CBLC:Oncogene];INTRACHROMOSOMAL[chr19:38.76Mb]
Patient3_Tum	CBLC--CTC-232P5.1	HGSOC	14	0.875	chr19:44781051:+	chr19:6012120:+	NA	6	2	1	CBLC--CTC-232P5.1:[CBLC:Oncogene];INTRACHROMOSOMAL[chr19:38.76Mb];;(recip)CTC-232P5.1--CBLC:[CBLC:Oncogene];INTRACHROMOSOMAL[chr19:38.76Mb]
Patient3_Tum	CBLC--CTC-232P5.1	HGSOC	14	0.875	chr19:44781363:+	chr19:6012120:+	NA	3	1	1	CBLC--CTC-232P5.1:[CBLC:Oncogene];INTRACHROMOSOMAL[chr19:38.76Mb];;(recip)CTC-232P5.1--CBLC:[CBLC:Oncogene];INTRACHROMOSOMAL[chr19:38.76Mb]
Patient3_Tum	CBLC--CTC-232P5.1	HGSOC	14	0.875	chr19:44778284:+	chr19:6012120:+	NA	1	NA	NA	CBLC--CTC-232P5.1:[CBLC:Oncogene];INTRACHROMOSOMAL[chr19:38.76Mb];;(recip)CTC-232P5.1--CBLC:[CBLC:Oncogene];INTRACHROMOSOMAL[chr19:38.76Mb]
Patient3_Tum	CBLC--CTC-232P5.1	HGSOC	14	0.875	chr19:6012120:+	chr19:44784401:+	4	NA	NA	NA	CBLC--CTC-232P5.1:[CBLC:Oncogene];INTRACHROMOSOMAL[chr19:38.76Mb];;(recip)CTC-232P5.1--CBLC:[CBLC:Oncogene];INTRACHROMOSOMAL[chr19:38.76Mb]
Patient3_Tum	CBLC--CTC-232P5.1	HGSOC	14	0.875	chr19:6012120:+	chr19:44784417:+	3	NA	NA	NA	CBLC--CTC-232P5.1:[CBLC:Oncogene];INTRACHROMOSOMAL[chr19:38.76Mb];;(recip)CTC-232P5.1--CBLC:[CBLC:Oncogene];INTRACHROMOSOMAL[chr19:38.76Mb]
Patient3_Tum	SNRNP70--ZIK1	HGSOC	7	0.875	chr19:49098704:+	chr19:57590011:+	NA	7	NA	NA	SNRNP70--ZIK1:INTRACHROMOSOMAL[chr19:8.47Mb];;(recip)ZIK1--SNRNP70:INTRACHROMOSOMAL[chr19:8.47Mb]

## Sheet: Sheet1
# Table S7: Fusions identified of interest for each of the HGSOC. Tumor samples
# frac_fusion_cells: fraction of cells identified with corresponding fusion that were found in this corresponding cell type.
# Arriba, CTAT-LR-Fusion, FusionInspector, and STAR-Fusion columns: counts of cell identified with the corresponding fusion by the corresponding fusion detection method.
# annots: fusion annotations from FusionAnnotator including annotations for the reciprocal fusion annotation (recip)
sample	FusionName	celltype_final	tot_cells_w_fusion	frac_fusion_cells	LeftBreakpoint	RightBreakpoint	Arriba	ctat.LR.fusion	FusionInspector	STAR.Fusion	annots
Patient1_Tum	SMG7--CH507-513H4.1	HGSOC	26	1	chr1:183472649:+	chr21:8222961:+	NA	26	NA	NA	SMG7--CH507-513H4.1:INTERCHROMOSOMAL[chr1--chr21];;(recip)CH507-513H4.1--SMG7:INTERCHROMOSOMAL[chr21--chr1]
Patient1_Tum	RAPGEF5--AGMO	HGSOC	6	1	chr7:22125604:-	chr7:15201359:-	NA	5	3	1	RAPGEF5--AGMO:INTRACHROMOSOMAL[chr7:6.56Mb];;(recip)AGMO--RAPGEF5:INTRACHROMOSOMAL[chr7:6.56Mb]
Patient1_Tum	GS1-279B7.2--GNG4	HGSOC	5	1	chr1:185318277:+	chr1:235583848:-	NA	5	NA	NA	GS1-279B7.2--GNG4:INTRACHROMOSOMAL[chr1:50.23Mb];;(recip)GNG4--GS1-279B7.2:INTRACHROMOSOMAL[chr1:50.23Mb]
Patient1_Tum	NTN1--CDRT15P2	HGSOC	5	1	chr17:9023391:+	chr17:15765108:+	NA	5	NA	NA	NTN1--CDRT15P2:INTRACHROMOSOMAL[chr17:6.52Mb];;(recip)CDRT15P2--NTN1:INTRACHROMOSOMAL[chr17:6.52Mb]
Patient2_Tum	IGF2BP2--TESPA1	HGSOC	176	0.988764	chr3:185696612:-	chr12:54950390:-	92	174	138	16	IGF2BP2--TESPA1:INTERCHROMOSOMAL[chr3--chr12];;(recip)TESPA1--IGF2BP2:INTERCHROMOSOMAL[chr12--chr3]
Patient2_Tum	IGF2BP2--TESPA1	HGSOC	176	0.988764	chr3:185823153:-	chr12:54950390:-	6	52	13	5	IGF2BP2--TESPA1:INTERCHROMOSOMAL[chr3--chr12];;(recip)TESPA1--IGF2BP2:INTERCHROMOSOMAL[chr12--chr3]
Patient2_Tum	IGF2BP2--TESPA1	HGSOC	176	0.988764	chr3:185824783:-	chr12:54950390:-	4	17	6	5	IGF2BP2--TESPA1:INTERCHROMOSOMAL[chr3--chr12];;(recip)TESPA1--IGF2BP2:INTERCHROMOSOMAL[chr12--chr3]
Patient2_Tum	IGF2BP2--TESPA1	HGSOC	176	0.988764	chr3:185698299:-	chr12:54950390:-	1	5	1	1	IGF2BP2--TESPA1:INTERCHROMOSOMAL[chr3--chr12];;(recip)TESPA1--IGF2BP2:INTERCHROMOSOMAL[chr12--chr3]
Patient2_Tum	IGF2BP2--TESPA1	HGSOC	176	0.988764	chr3:185696609:-	chr12:54950390:-	NA	NA	3	NA	IGF2BP2--TESPA1:INTERCHROMOSOMAL[chr3--chr12];;(recip)TESPA1--IGF2BP2:INTERCHROMOSOMAL[chr12--chr3]
Patient2_Tum	PSMB7--SCAI	HGSOC	52	0.981132	chr9:124405317:-	chr9:125056007:-	2	28	2	2	PSMB7--SCAI:INTRACHROMOSOMAL[chr9:0.53Mb];;(recip)SCAI--PSMB7:[Klijn_CellLines,DepMap2023];INTRACHROMOSOMAL[chr9:0.53Mb]
Patient2_Tum	PSMB7--SCAI	HGSOC	52	0.981132	chr9:124405317:-	chr9:125066058:-	NA	26	3	2	PSMB7--SCAI:INTRACHROMOSOMAL[chr9:0.53Mb];;(recip)SCAI--PSMB7:[Klijn_CellLines,DepMap2023];INTRACHROMOSOMAL[chr9:0.53Mb]
Patient2_Tum	PSMB7--SCAI	HGSOC	52	0.981132	chr9:124412352:-	chr9:125056007:-	NA	9	2	1	PSMB7--SCAI:INTRACHROMOSOMAL[chr9:0.53Mb];;(recip)SCAI--PSMB7:[Klijn_CellLines,DepMap2023];INTRACHROMOSOMAL[chr9:0.53Mb]
Patient2_Tum	PSMB7--SCAI	HGSOC	52	0.981132	chr9:124405317:-	chr9:125029739:-	NA	2	NA	NA	PSMB7--SCAI:INTRACHROMOSOMAL[chr9:0.53Mb];;(recip)SCAI--PSMB7:[Klijn_CellLines,DepMap2023];INTRACHROMOSOMAL[chr9:0.53Mb]
Patient2_Tum	SRSF7--DHX57	HGSOC	36	0.972973	chr2:38746144:-	chr2:38815655:-	NA	35	3	2	SRSF7--DHX57:[DepMap2023,CCLE_StarF2019];INTRACHROMOSOMAL[chr2:0.05Mb];LOCAL_REARRANGEMENT:-:[46235];;(recip)DHX57--SRSF7:INTRACHROMOSOMAL[chr2:0.05Mb];NEIGHBORS[46235]
Patient2_Tum	SRSF7--DHX57	HGSOC	36	0.972973	chr2:38746144:-	chr2:38816612:-	NA	2	NA	NA	SRSF7--DHX57:[DepMap2023,CCLE_StarF2019];INTRACHROMOSOMAL[chr2:0.05Mb];LOCAL_REARRANGEMENT:-:[46235];;(recip)DHX57--SRSF7:INTRACHROMOSOMAL[chr2:0.05Mb];NEIGHBORS[46235]
Patient2_Tum	MIR4435-1HG--DARS	HGSOC	21	1	chr2:111494885:-	chr2:135943480:-	NA	20	1	NA	MIR4435-1HG--DARS:INTRACHROMOSOMAL[chr2:24.41Mb];;(recip)DARS--MIR4435-1HG:INTRACHROMOSOMAL[chr2:24.41Mb]
Patient2_Tum	MIR4435-1HG--DARS	HGSOC	21	1	chr2:111494881:-	chr2:135911405:-	NA	1	NA	NA	MIR4435-1HG--DARS:INTRACHROMOSOMAL[chr2:24.41Mb];;(recip)DARS--MIR4435-1HG:INTRACHROMOSOMAL[chr2:24.41Mb]
Patient2_Tum	MIR4435-1HG--DARS	HGSOC	21	1	chr2:111494885:-	chr2:135933990:-	NA	1	NA	NA	MIR4435-1HG--DARS:INTRACHROMOSOMAL[chr2:24.41Mb];;(recip)DARS--MIR4435-1HG:INTRACHROMOSOMAL[chr2:24.41Mb]
Patient2_Tum	SPATS2--TRA2B	HGSOC	21	1	chr12:49461037:+	chr3:185931852:-	NA	21	10	6	SPATS2--TRA2B:INTERCHROMOSOMAL[chr12--chr3];;(recip)TRA2B--SPATS2:INTERCHROMOSOMAL[chr3--chr12]
Patient2_Tum	SPATS2--TRA2B	HGSOC	21	1	chr3:185931852:-	chr12:49461037:+	5	NA	NA	NA	SPATS2--TRA2B:INTERCHROMOSOMAL[chr12--chr3];;(recip)TRA2B--SPATS2:INTERCHROMOSOMAL[chr3--chr12]
Patient2_Tum	CBL--KMT2A	HGSOC	16	1	chr11:119232695:+	chr11:118480174:+	NA	15	NA	NA	CBL--KMT2A:[CBL:FoundationOne_panel,CBL:ArcherDX_panel,CBL:Oncogene];[KMT2A:Oncogene,KMT2A:FoundationOne_panel,KMT2A:ArcherDX_panel];INTRACHROMOSOMAL[chr11:0.68Mb];;(recip)KMT2A--CBL:[KMT2A:Oncogene,KMT2A:FoundationOne_panel,KMT2A:ArcherDX_panel];[CBL:FoundationOne_panel,CBL:ArcherDX_panel,CBL:Oncogene];[Mitelman,ChimerKB,Cosmic];INTRACHROMOSOMAL[chr11:0.68Mb]
Patient2_Tum	CBL--KMT2A	HGSOC	16	1	chr11:119232695:+	chr11:118481715:+	NA	1	NA	NA	CBL--KMT2A:[CBL:FoundationOne_panel,CBL:ArcherDX_panel,CBL:Oncogene];[KMT2A:Oncogene,KMT2A:FoundationOne_panel,KMT2A:ArcherDX_panel];INTRACHROMOSOMAL[chr11:0.68Mb];;(recip)KMT2A--CBL:[KMT2A:Oncogene,KMT2A:FoundationOne_panel,KMT2A:ArcherDX_panel];[CBL:FoundationOne_panel,CBL:ArcherDX_panel,CBL:Oncogene];[Mitelman,ChimerKB,Cosmic];INTRACHROMOSOMAL[chr11:0.68Mb]
Patient2_Tum	PLXNB2--DENND6B	HGSOC	14	1	chr22:50294719:-	chr22:50319003:-	NA	9	NA	NA	PLXNB2--DENND6B:[DepMap2023,TCGA_StarF2019,CCLE_StarF2019];INTRACHROMOSOMAL[chr22:0.00Mb];LOCAL_REARRANGEMENT:-:[1403];;(recip)DENND6B--PLXNB2:INTRACHROMOSOMAL[chr22:0.00Mb];NEIGHBORS[1403]
Patient2_Tum	PLXNB2--DENND6B	HGSOC	14	1	chr22:50294726:-	chr22:50319003:-	NA	6	NA	NA	PLXNB2--DENND6B:[DepMap2023,TCGA_StarF2019,CCLE_StarF2019];INTRACHROMOSOMAL[chr22:0.00Mb];LOCAL_REARRANGEMENT:-:[1403];;(recip)DENND6B--PLXNB2:INTRACHROMOSOMAL[chr22:0.00Mb];NEIGHBORS[1403]
Patient2_Tum	RP11-96H19.1--RP11-446N19.1	HGSOC	14	1	chr12:46387972:+	chr12:46652390:+	NA	13	8	NA	RP11-96H19.1--RP11-446N19.1:[DepMap2023];INTRACHROMOSOMAL[chr12:0.12Mb];;(recip)RP11-446N19.1--RP11-96H19.1:INTRACHROMOSOMAL[chr12:0.12Mb]
Patient2_Tum	DEK--CASC17	HGSOC	11	1	chr6:18249578:-	chr17:71185655:-	NA	11	NA	NA	DEK--CASC17:[DEK:Oncogene];INTERCHROMOSOMAL[chr6--chr17];;(recip)CASC17--DEK:[DEK:Oncogene];INTERCHROMOSOMAL[chr17--chr6]
Patient2_Tum	SLC7A6--ELMO3	HGSOC	11	1	chr16:68275249:+	chr16:67202397:+	NA	6	NA	NA	SLC7A6--ELMO3:INTRACHROMOSOMAL[chr16:1.06Mb];;(recip)ELMO3--SLC7A6:INTRACHROMOSOMAL[chr16:1.06Mb]
Patient2_Tum	SLC7A6--ELMO3	HGSOC	11	1	chr16:68275249:+	chr16:67202176:+	NA	2	NA	NA	SLC7A6--ELMO3:INTRACHROMOSOMAL[chr16:1.06Mb];;(recip)ELMO3--SLC7A6:INTRACHROMOSOMAL[chr16:1.06Mb]
Patient2_Tum	SLC7A6--ELMO3	HGSOC	11	1	chr16:68266721:+	chr16:67202176:+	NA	1	NA	NA	SLC7A6--ELMO3:INTRACHROMOSOMAL[chr16:1.06Mb];;(recip)ELMO3--SLC7A6:INTRACHROMOSOMAL[chr16:1.06Mb]
Patient2_Tum	SLC7A6--ELMO3	HGSOC	11	1	chr16:68266721:+	chr16:67202397:+	NA	1	NA	NA	SLC7A6--ELMO3:INTRACHROMOSOMAL[chr16:1.06Mb];;(recip)ELMO3--SLC7A6:INTRACHROMOSOMAL[chr16:1.06Mb]
Patient2_Tum	SLC7A6--ELMO3	HGSOC	11	1	chr16:68273904:+	chr16:67203808:+	NA	1	NA	NA	SLC7A6--ELMO3:INTRACHROMOSOMAL[chr16:1.06Mb];;(recip)ELMO3--SLC7A6:INTRACHROMOSOMAL[chr16:1.06Mb]
Patient2_Tum	CTD-2008L17.1--RP11-456O19.2	HGSOC	8	1	chr18:55893442:+	chr18:56096075:+	NA	5	6	4	CTD-2008L17.1--RP11-456O19.2:[DepMap2023];INTRACHROMOSOMAL[chr18:0.02Mb];NEIGHBORS[18613];;(recip)RP11-456O19.2--CTD-2008L17.1:INTRACHROMOSOMAL[chr18:0.02Mb];LOCAL_REARRANGEMENT:+:[18613]
Patient2_Tum	CTD-2008L17.1--RP11-456O19.2	HGSOC	8	1	chr18:55893442:+	chr18:56050080:+	NA	NA	4	1	CTD-2008L17.1--RP11-456O19.2:[DepMap2023];INTRACHROMOSOMAL[chr18:0.02Mb];NEIGHBORS[18613];;(recip)RP11-456O19.2--CTD-2008L17.1:INTRACHROMOSOMAL[chr18:0.02Mb];LOCAL_REARRANGEMENT:+:[18613]
Patient2_Tum	TRIM23--RP11-454P21.1	HGSOC	8	1	chr5:65596421:-	chr5:17850183:+	NA	7	NA	NA	TRIM23--RP11-454P21.1:INTRACHROMOSOMAL[chr5:47.63Mb];;(recip)RP11-454P21.1--TRIM23:INTRACHROMOSOMAL[chr5:47.63Mb]
Patient2_Tum	TRIM23--RP11-454P21.1	HGSOC	8	1	chr5:65604911:-	chr5:17852606:+	NA	1	NA	NA	TRIM23--RP11-454P21.1:INTRACHROMOSOMAL[chr5:47.63Mb];;(recip)RP11-454P21.1--TRIM23:INTRACHROMOSOMAL[chr5:47.63Mb]
Patient2_Tum	WDR59--AARS	HGSOC	8	1	chr16:74903947:-	chr16:70271972:-	NA	8	4	4	WDR59--AARS:INTRACHROMOSOMAL[chr16:4.58Mb];;(recip)AARS--WDR59:INTRACHROMOSOMAL[chr16:4.58Mb]
Patient2_Tum	DUXAP10--LA16c-60G3.6	HGSOC	7	1	chr14:19062466:+	chr22:15541437:+	NA	7	NA	NA	DUXAP10--LA16c-60G3.6:INTERCHROMOSOMAL[chr14--chr22];;(recip)LA16c-60G3.6--DUXAP10:INTERCHROMOSOMAL[chr22--chr14]
Patient2_Tum	SMC1B--TBC1D22A	HGSOC	6	1	chr22:45409875:-	chr22:46797620:+	6	NA	NA	NA	NA
Patient2_Tum	TBL1XR1--TBL1XR1(22663),LINC00501(43779)	HGSOC	6	1	chr3:177197121:-	chr3:177250663:.	6	NA	NA	NA	NA
Patient2_Tum	DEK--RNU7-155P(196402),AC118653.2(101718)	HGSOC	5	1	chr6:18249651:-	chr17:71494620:.	5	NA	NA	NA	NA
Patient3_Tum	CBLC--CTC-232P5.1	HGSOC	14	0.875	chr19:44784401:+	chr19:6012120:+	NA	11	6	4	CBLC--CTC-232P5.1:[CBLC:Oncogene];INTRACHROMOSOMAL[chr19:38.76Mb];;(recip)CTC-232P5.1--CBLC:[CBLC:Oncogene];INTRACHROMOSOMAL[chr19:38.76Mb]
Patient3_Tum	CBLC--CTC-232P5.1	HGSOC	14	0.875	chr19:44784417:+	chr19:6012120:+	NA	8	3	3	CBLC--CTC-232P5.1:[CBLC:Oncogene];INTRACHROMOSOMAL[chr19:38.76Mb];;(recip)CTC-232P5.1--CBLC:[CBLC:Oncogene];INTRACHROMOSOMAL[chr19:38.76Mb]
Patient3_Tum	CBLC--CTC-232P5.1	HGSOC	14	0.875	chr19:44781051:+	chr19:6012120:+	NA	6	2	1	CBLC--CTC-232P5.1:[CBLC:Oncogene];INTRACHROMOSOMAL[chr19:38.76Mb];;(recip)CTC-232P5.1--CBLC:[CBLC:Oncogene];INTRACHROMOSOMAL[chr19:38.76Mb]
Patient3_Tum	CBLC--CTC-232P5.1	HGSOC	14	0.875	chr19:44781363:+	chr19:6012120:+	NA	3	1	1	CBLC--CTC-232P5.1:[CBLC:Oncogene];INTRACHROMOSOMAL[chr19:38.76Mb];;(recip)CTC-232P5.1--CBLC:[CBLC:Oncogene];INTRACHROMOSOMAL[chr19:38.76Mb]
Patient3_Tum	CBLC--CTC-232P5.1	HGSOC	14	0.875	chr19:44778284:+	chr19:6012120:+	NA	1	NA	NA	CBLC--CTC-232P5.1:[CBLC:Oncogene];INTRACHROMOSOMAL[chr19:38.76Mb];;(recip)CTC-232P5.1--CBLC:[CBLC:Oncogene];INTRACHROMOSOMAL[chr19:38.76Mb]
Patient3_Tum	CBLC--CTC-232P5.1	HGSOC	14	0.875	chr19:6012120:+	chr19:44784401:+	4	NA	NA	NA	CBLC--CTC-232P5.1:[CBLC:Oncogene];INTRACHROMOSOMAL[chr19:38.76Mb];;(recip)CTC-232P5.1--CBLC:[CBLC:Oncogene];INTRACHROMOSOMAL[chr19:38.76Mb]
Patient3_Tum	CBLC--CTC-232P5.1	HGSOC	14	0.875	chr19:6012120:+	chr19:44784417:+	3	NA	NA	NA	CBLC--CTC-232P5.1:[CBLC:Oncogene];INTRACHROMOSOMAL[chr19:38.76Mb];;(recip)CTC-232P5.1--CBLC:[CBLC:Oncogene];INTRACHROMOSOMAL[chr19:38.76Mb]
Patient3_Tum	SNRNP70--ZIK1	HGSOC	7	0.875	chr19:49098704:+	chr19:57590011:+	NA	7	NA	NA	SNRNP70--ZIK1:INTRACHROMOSOMAL[chr19:8.47Mb];;(recip)ZIK1--SNRNP70:INTRACHROMOSOMAL[chr19:8.47Mb]
