# Supplementary material for: Accurate fusion transcript identification from long- and short-read isoform sequencing at bulk or single-cell resolution
Source: Genome Res. 2025 Apr;35(4):967–86. doi: 10.1101/gr.279200.124 (PMC12047241; doi:10.1101/gr.279200.124)
Supplement: Supplement 9 [file Supplemental_Table_S8.xlsx]

## Sheet: Sheet1
# Table S8: Reverse primer sequences
primer designation	Reverse primer Sequence
bc01	CTACACGACGCTCTTCCGATCTACTACACGCAATGAAGTCGCAGGGTTGG
bc02	CTACACGACGCTCTTCCGATCTACTAGTAGCAATGAAGTCGCAGGGTTGG
bc03	CTACACGACGCTCTTCCGATCTAGTGTACGCAATGAAGTCGCAGGGTTGG
bc04	CTACACGACGCTCTTCCGATCTATCACTAGCAATGAAGTCGCAGGGTTGG
bc05	CTACACGACGCTCTTCCGATCTCAGCTGTGCAATGAAGTCGCAGGGTTGG
bc06	CTACACGACGCTCTTCCGATCTCAGTCACGCAATGAAGTCGCAGGGTTGG
bc07	CTACACGACGCTCTTCCGATCTCATGTATGCAATGAAGTCGCAGGGTTGG
bc08	CTACACGACGCTCTTCCGATCTCGTATGTGCAATGAAGTCGCAGGGTTGG
bc10	CTACACGACGCTCTTCCGATCTGAGTCTAGCAATGAAGTCGCAGGGTTGG
