# Supplementary material for: Accurate fusion transcript identification from long- and short-read isoform sequencing at bulk or single-cell resolution
Source: Genome Res. 2025 Apr;35(4):967–86. doi: 10.1101/gr.279200.124 (PMC12047241; doi:10.1101/gr.279200.124)
Supplement: Supplement 10 [file Supplemental_Table_S9.xlsx]

## Sheet: Sheet1
# Table S9: MAS-ISO-seq array barcodes
Primer	Sequence
A-Fwd_MAS-Seq_PC	AGCTTACTUGTGAAGAUCTACACGACGCTCTTCCGATCT
B-Rev_MAS_Seq	ATAGACAGCUTACAAGUAAGCAGTGGTATCAACGCAGAG
B-Fwd_MAS_Seq	ACTTGTAAGCUGTCTAUCTACACGACGCTCTTCCGATCT
C-Rev_MAS_Seq	ATCGGACCUGACAGAGUAAGCAGTGGTATCAACGCAGAG
C-Fwd_MAS_Seq	ACTCTGUCAGGTCCGAUCTACACGACGCTCTTCCGATCT
D-Rev_MAS_Seq	ATTCUGGAGGAGGAGGUAAGCAGTGGTATCAACGCAGAG
D-Fwd_MAS_Seq	ACCTCCTCCUCCAGAAUCTACACGACGCTCTTCCGATCT
E-Rev_MAS_Seq	ACTAAGTGUGTCCGGTUAAGCAGTGGTATCAACGCAGAG
E-Fwd_MAS_Seq	AACCGGACACACUTAGUCTACACGACGCTCTTCCGATCT
F-Rev_MAS_Seq	ACTGCGAAUTGGACTCUAAGCAGTGGTATCAACGCAGAG
F-Fwd_MAS_Seq	AGAGTCCAAUTCGCAGUCTACACGACGCTCTTCCGATCT
G-Rev_MAS_Seq	ACCGTUAAGCCTTGATUAAGCAGTGGTATCAACGCAGAG
G-Fwd_MAS_Seq	AATCAAGGCUTAACGGUCTACACGACGCTCTTCCGATCT
H-Rev_MAS_Seq	ACGCTAGGAUTCAACAUAAGCAGTGGTATCAACGCAGAG
Q-Rev_MAS_Seq_PC	AUGCACACAGCUACUAAGCAGTGGTATCAACGCAGAG
