# Supplementary material for: Accurate fusion transcript identification from long- and short-read isoform sequencing at bulk or single-cell resolution
Source: HighWire-hosted journal article supplement (doi:10.1101/gr.279200.124), 2025-03-14
Supplement: Supplemental_File_2.zip [file coa-0710-0497-seraseq-fusion-rna-mix-v4-10646847.pdf › CTAT-LRF-Paper/2.SeraCareFusions/__SeraCareDocs/coa-0710-0497-seraseq-fusion-rna-mix-v4-10646847.pdf]

# Certificate of Analysis

**For Research Use Only, Not for use in Diagnostic Procedures**

Product Description: Seraseq Fusion RNA Mix v4  
 Material No: 0710-0497 Batch No: 10646847  
 Date of Manufacture: 05 JAN 2023 Expiration Date: 07 JUN 2024

Nominal Concentration: 25 ng /  $\mu$ L Volume: 25  $\mu$ L  
 Concentration test Method: Thermo Fisher Qubit RNA BR Assay  
 Measured Concentration: 26 ng /  $\mu$ L

Nominal Fusion Concentration: 1500 Fusion copies/ $\mu$ L  
 Fusion Test Method: Droplet Digital PCR using TaqMan™ probes run on the BioRad QX200 system

Measured Fusion Concentrations:

| RNA Fusion           | Digital PCR Average Fusion copies/ $\mu$ L |
|----------------------|--------------------------------------------|
| CCDC6-RET            | 1432                                       |
| CD74-ROS1            | 1639                                       |
| EGFR variant III     | 3976                                       |
| EGFR-SEPT14          | 1551                                       |
| EML4-ALK             | 1624                                       |
| ETV6-NTRK3           | 1364                                       |
| FGFR3-BAIAP2L1       | 1293                                       |
| FGFR3-TACC3          | 3373                                       |
| KIF5B-RET            | 2371                                       |
| LMNA-NTRK1           | 1608                                       |
| MET Exon 14 Skipping | 1587                                       |
| NCOA4-RET            | 2007                                       |
| PAX8-PPARG1          | 1761                                       |
| SLC34A2-ROS1         | 2249                                       |
| SLC45A3-BRAF         | 1577                                       |
| TFG-NTRK1            | 1216                                       |
| TMPRSS2-ERG          | 3173                                       |
| TPM3-NTRK1           | 1364                                       |

# Certificate of Analysis

For Research Use Only, Not for use in Diagnostic Procedures

NGS Result: Positive for each of the 18 fusions and exon skipping events  
 NGS Fusion Test Method: Archer® FusionPlex® Solid Tumor Assay run on the Illumina® MiSeq™ instrument (300-cycle Reagent Kit v2, ) at 250 ng RNA input  
 NGS Analysis Method: Data analyzed using Archer Analysis Suite Software version 6.2.7 (default parameters).  
 NGS Data:

| RNA Fusion           | NGS Average Unique Start Sites per Fusion | NGS Average Unique Reads per Fusion* |
|----------------------|-------------------------------------------|--------------------------------------|
| CCDC6-RET            | 147                                       | 836                                  |
| CD74-ROS1            | 136                                       | 1009                                 |
| EGFR variant III     | 134                                       | 425                                  |
| EGFR-SEPT14          | 311                                       | 940                                  |
| EML4-ALK             | 176                                       | 1628                                 |
| ETV6-NTRK3           | 372                                       | 1747                                 |
| FGFR3-BAIAP2L1       | 151                                       | 1442                                 |
| FGFR3-TACC3          | 194                                       | 2266                                 |
| KIF5B-RET            | 224                                       | 2910                                 |
| LMNA-NTRK1           | 245                                       | 3630                                 |
| MET Exon 14 Skipping | 161                                       | 494                                  |
| NCOA4-RET            | 133                                       | 922                                  |
| PAX8-PPARG1          | 118                                       | 704                                  |
| SLC34A2-ROS1         | 162                                       | 1360                                 |
| SLC45A3-BRAF         | 92                                        | 6438                                 |
| TFG-NTRK1            | 189                                       | 1703                                 |
| TMPRSS2-ERG          | 145                                       | 11100                                |
| TPM3-NTRK1           | 341                                       | 3474                                 |

\*Total number of reads per sample was 5.2 M.

Approval:



16 JAN 2023

Prepared By

Date



17 JAN 2023

QA Verified By

Date
