# Supplementary material for: Accurate fusion transcript identification from long- and short-read isoform sequencing at bulk or single-cell resolution
Source: HighWire-hosted journal article supplement (doi:10.1101/gr.279200.124), 2025-03-14

Patient 1 Tumor, Fusion: SMG7--CH507-513H4.1

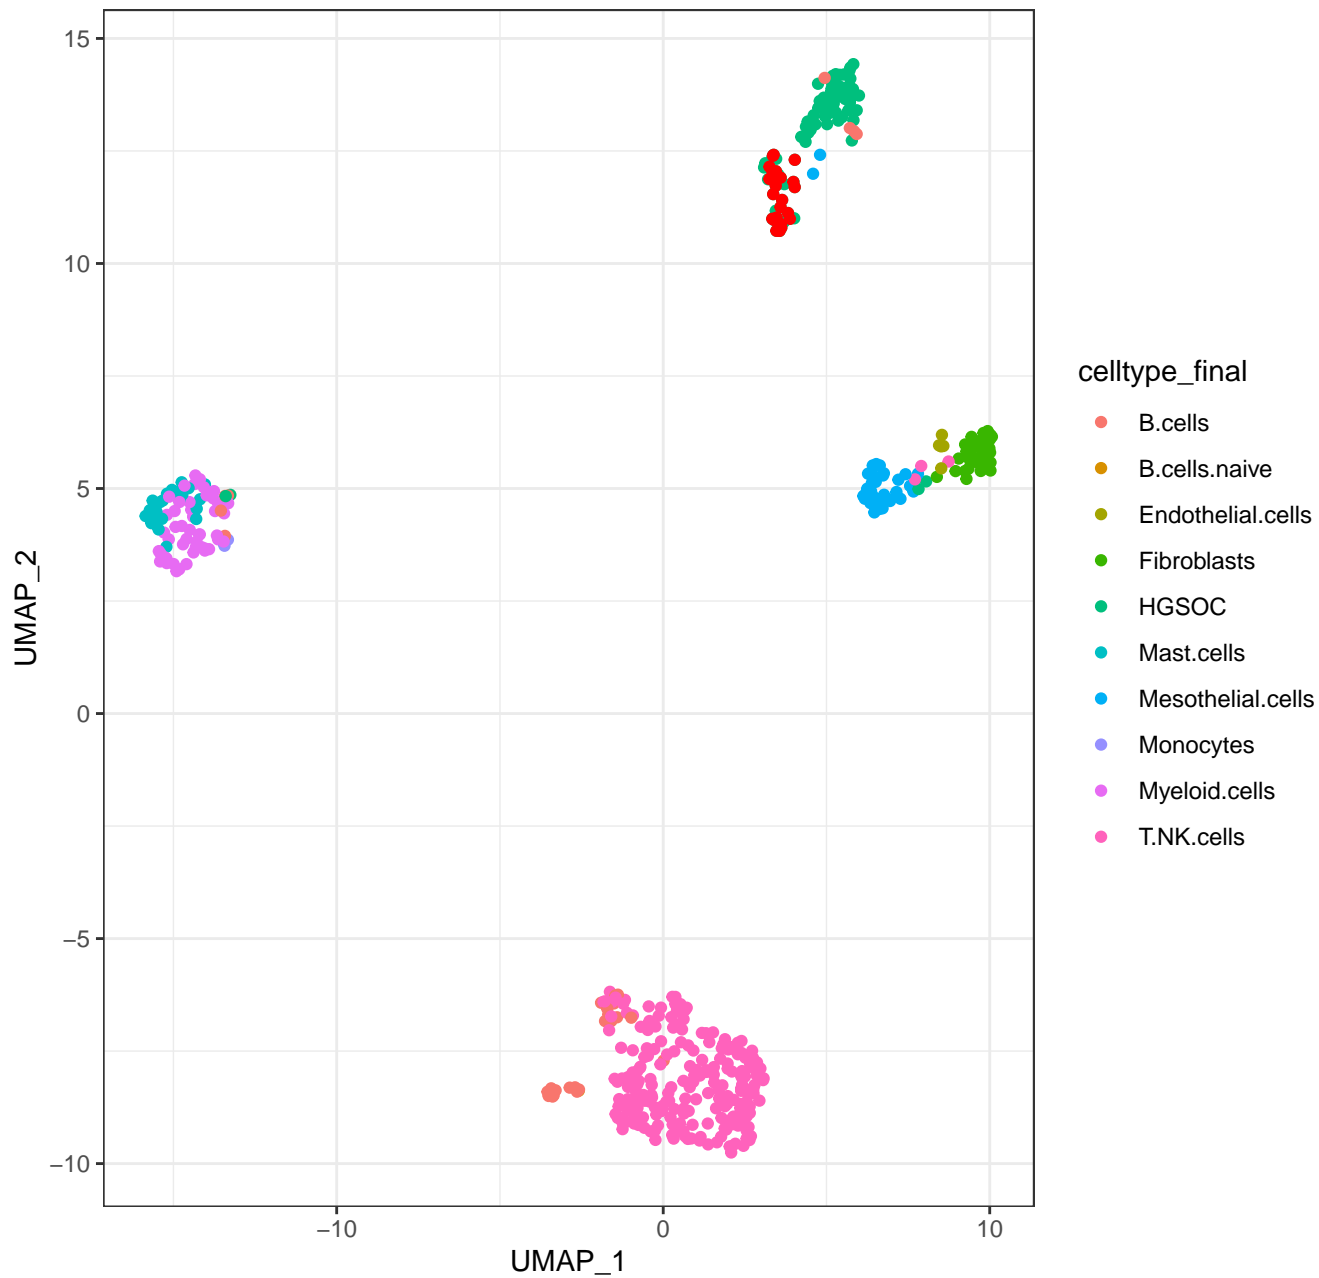

Patient 1 Tumor, Fusion: RAPGEF5--AGMO

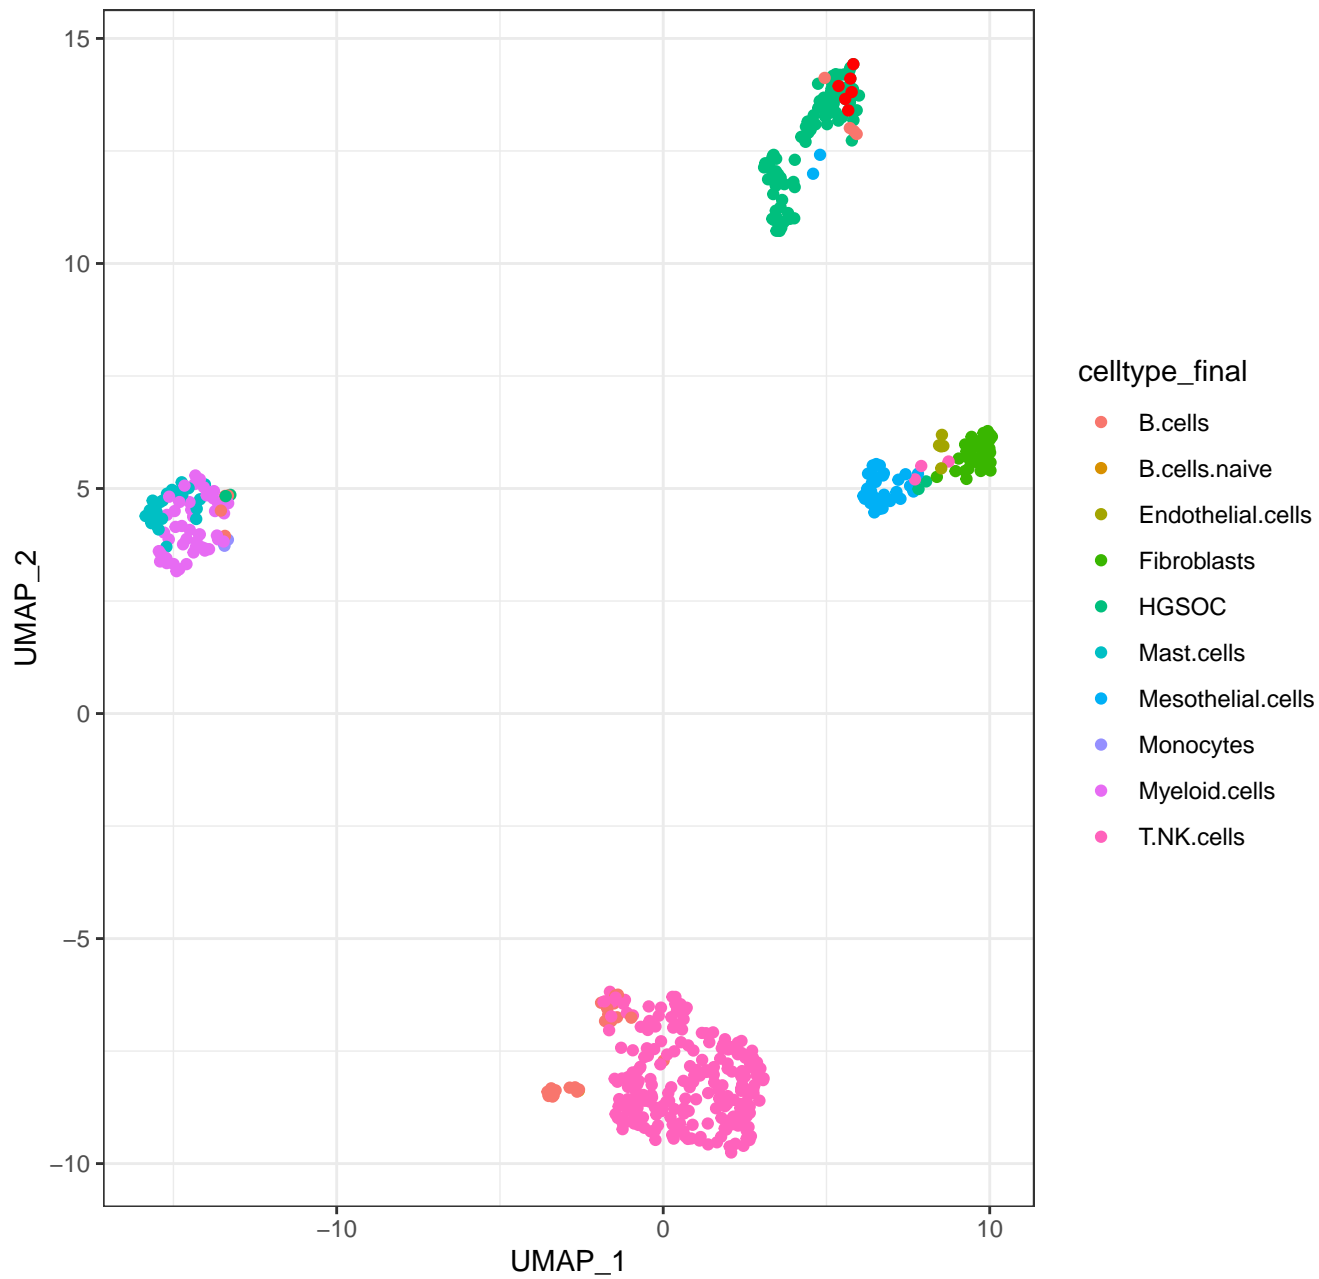

Patient 1 Tumor, Fusion: GS1-279B7.2--GNG4

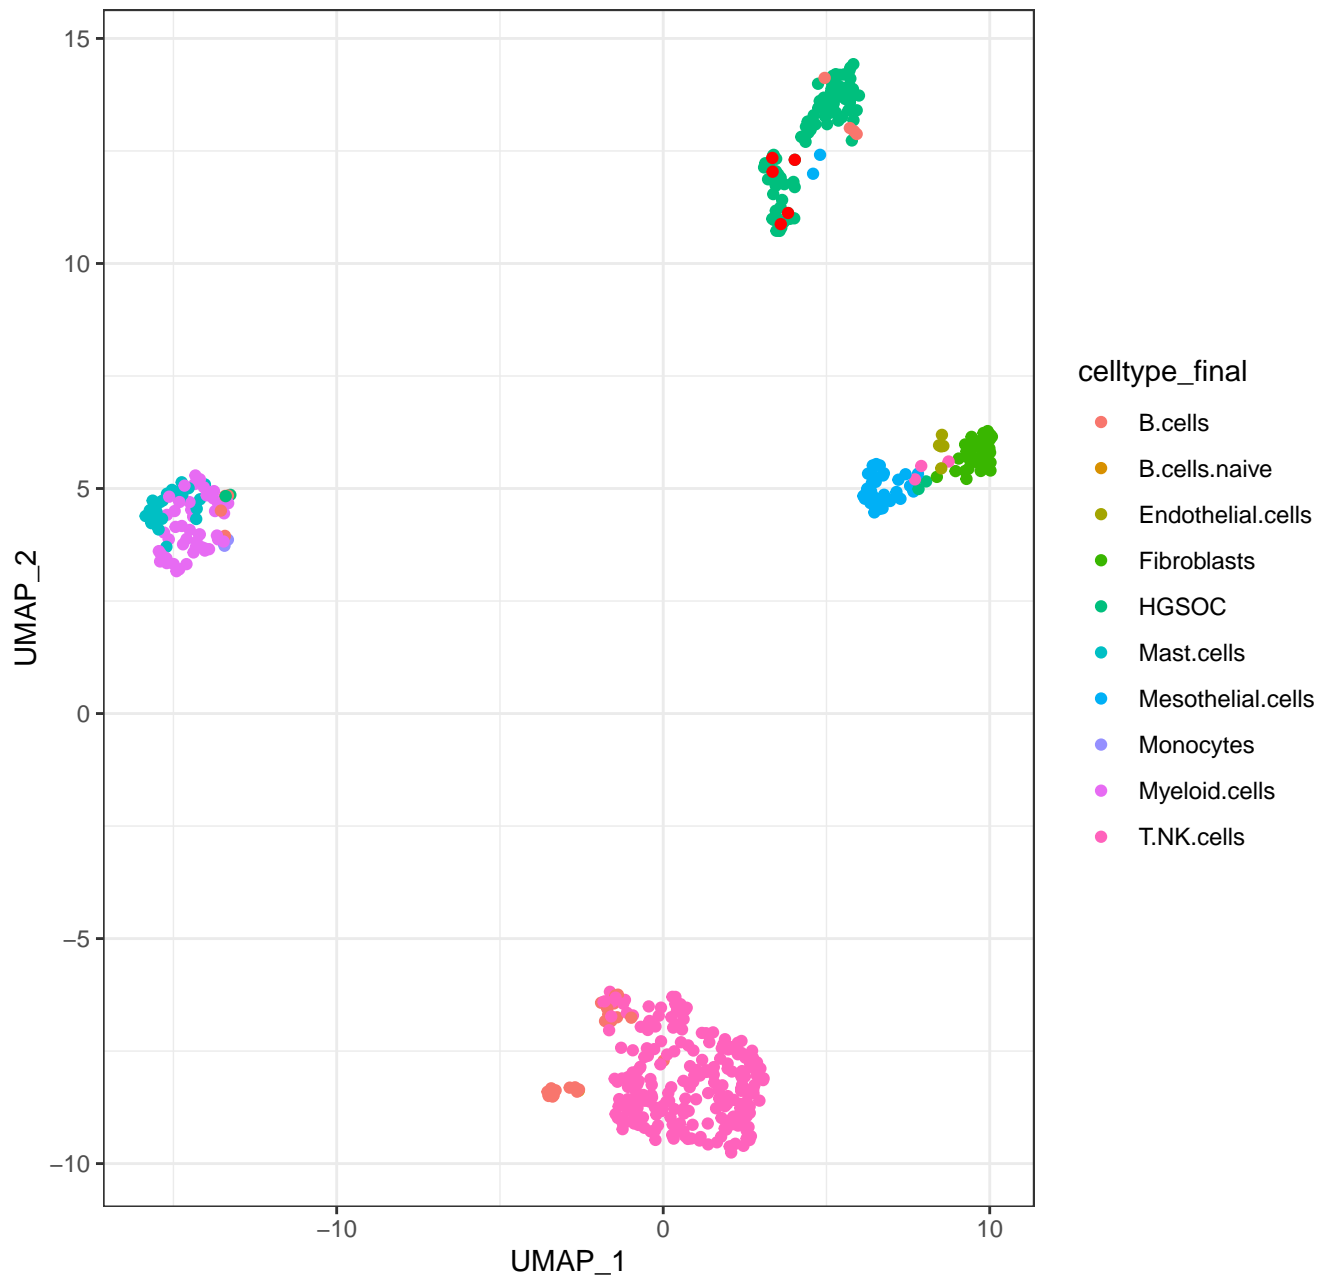

Patient 1 Tumor, Fusion: NTN1--CDRT15P2

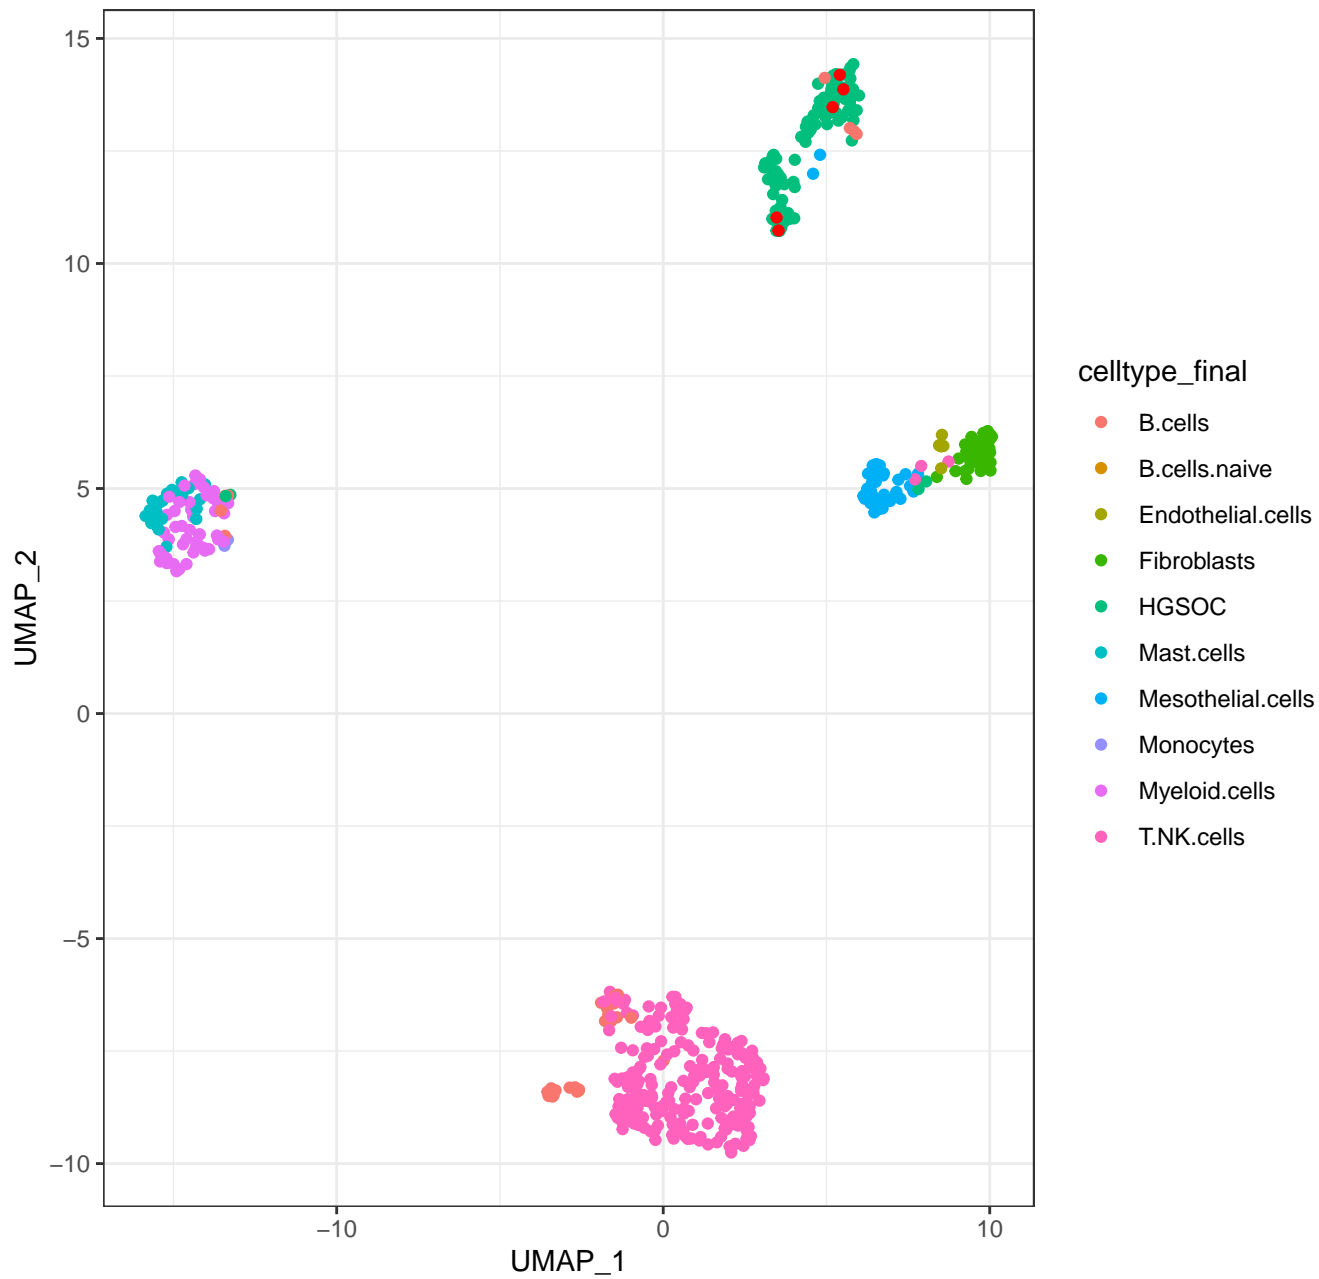

Supplement: Supplemental_File_2.zip [file Patient1_Tum.fusions_of_interest.pdf › CTAT-LRF-Paper/4.SingleCellFusions/4b.sc_HGSOC/Patient1_Tum.fusions_of_interest.pdf]
