# Supplementary figures and images for: Accurate fusion transcript identification from long- and short-read isoform sequencing at bulk or single-cell resolution
Source: HighWire-hosted journal article supplement (doi:10.1101/gr.279200.124), 2025-03-14

# VCAP TMRSS2--ERG by FFPM

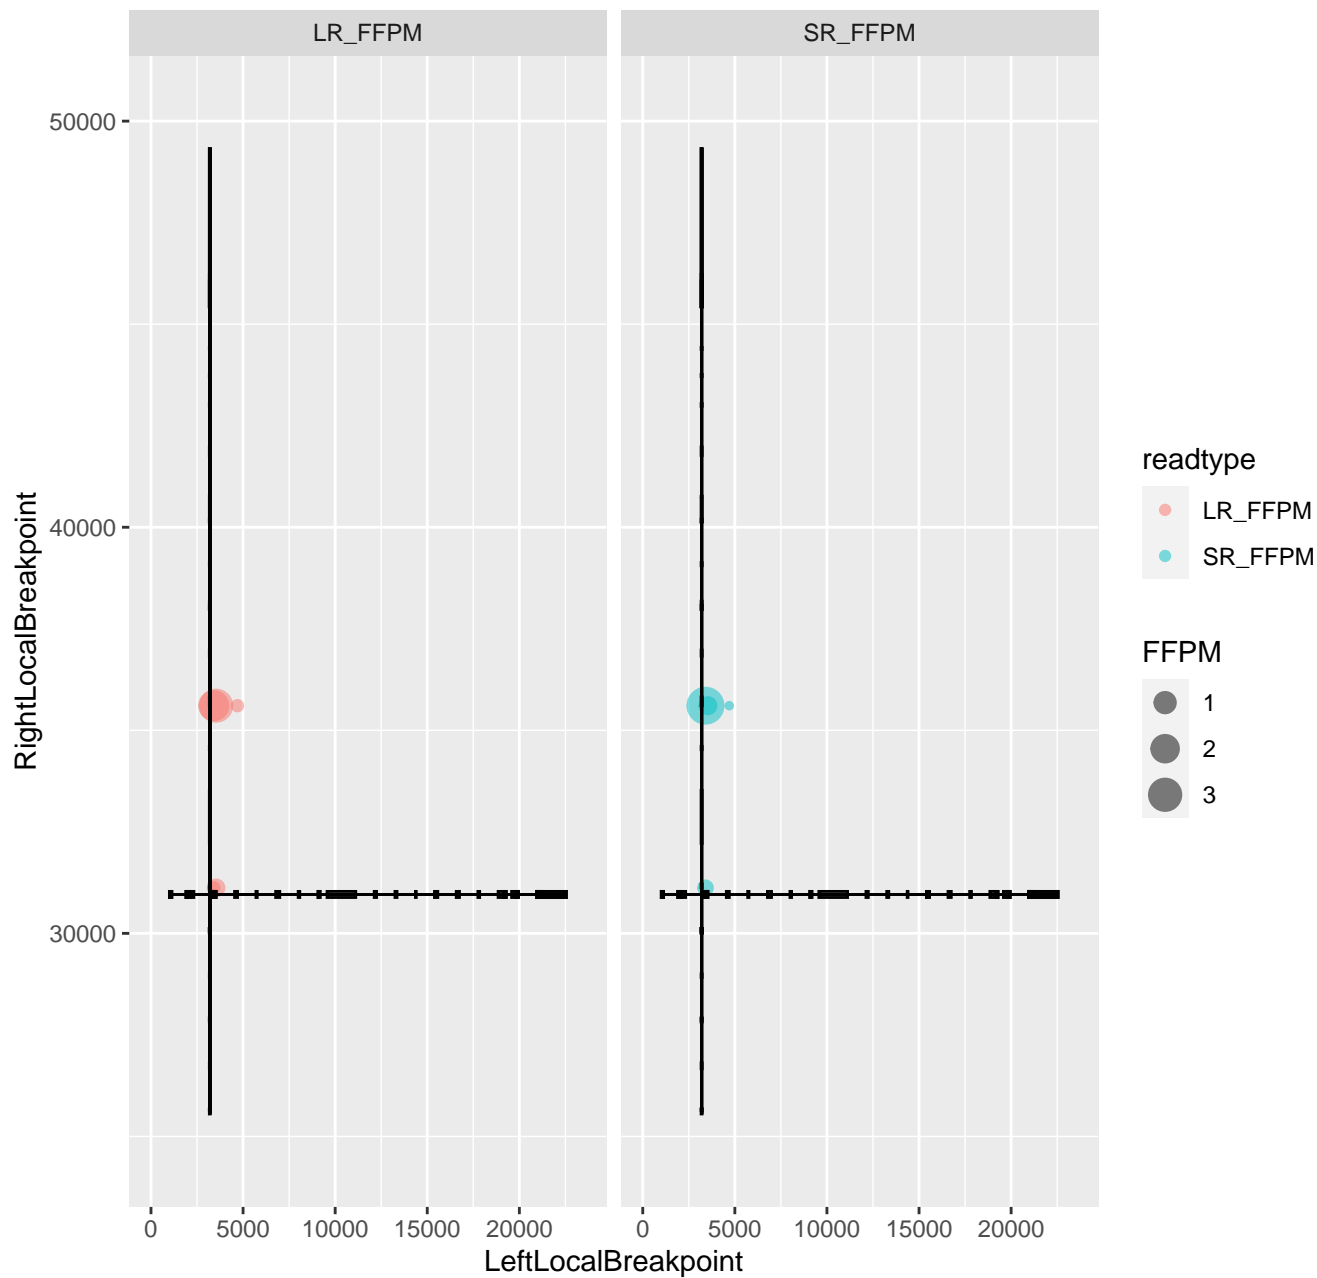

Supplement: Supplemental_File_2.zip [file depmap_VCaP_TMPRSS2--ERG_LR_vs_SR_isoforms.pdf › CTAT-LRF-Paper/3.DepMap9Lines/3a.CTAT_DepMap9Lines/depmap_VCaP_TMPRSS2--ERG_LR_vs_SR_isoforms.pdf]

# M132TS, Fusion: NUTM2A-AS1--RP11-203L2.4

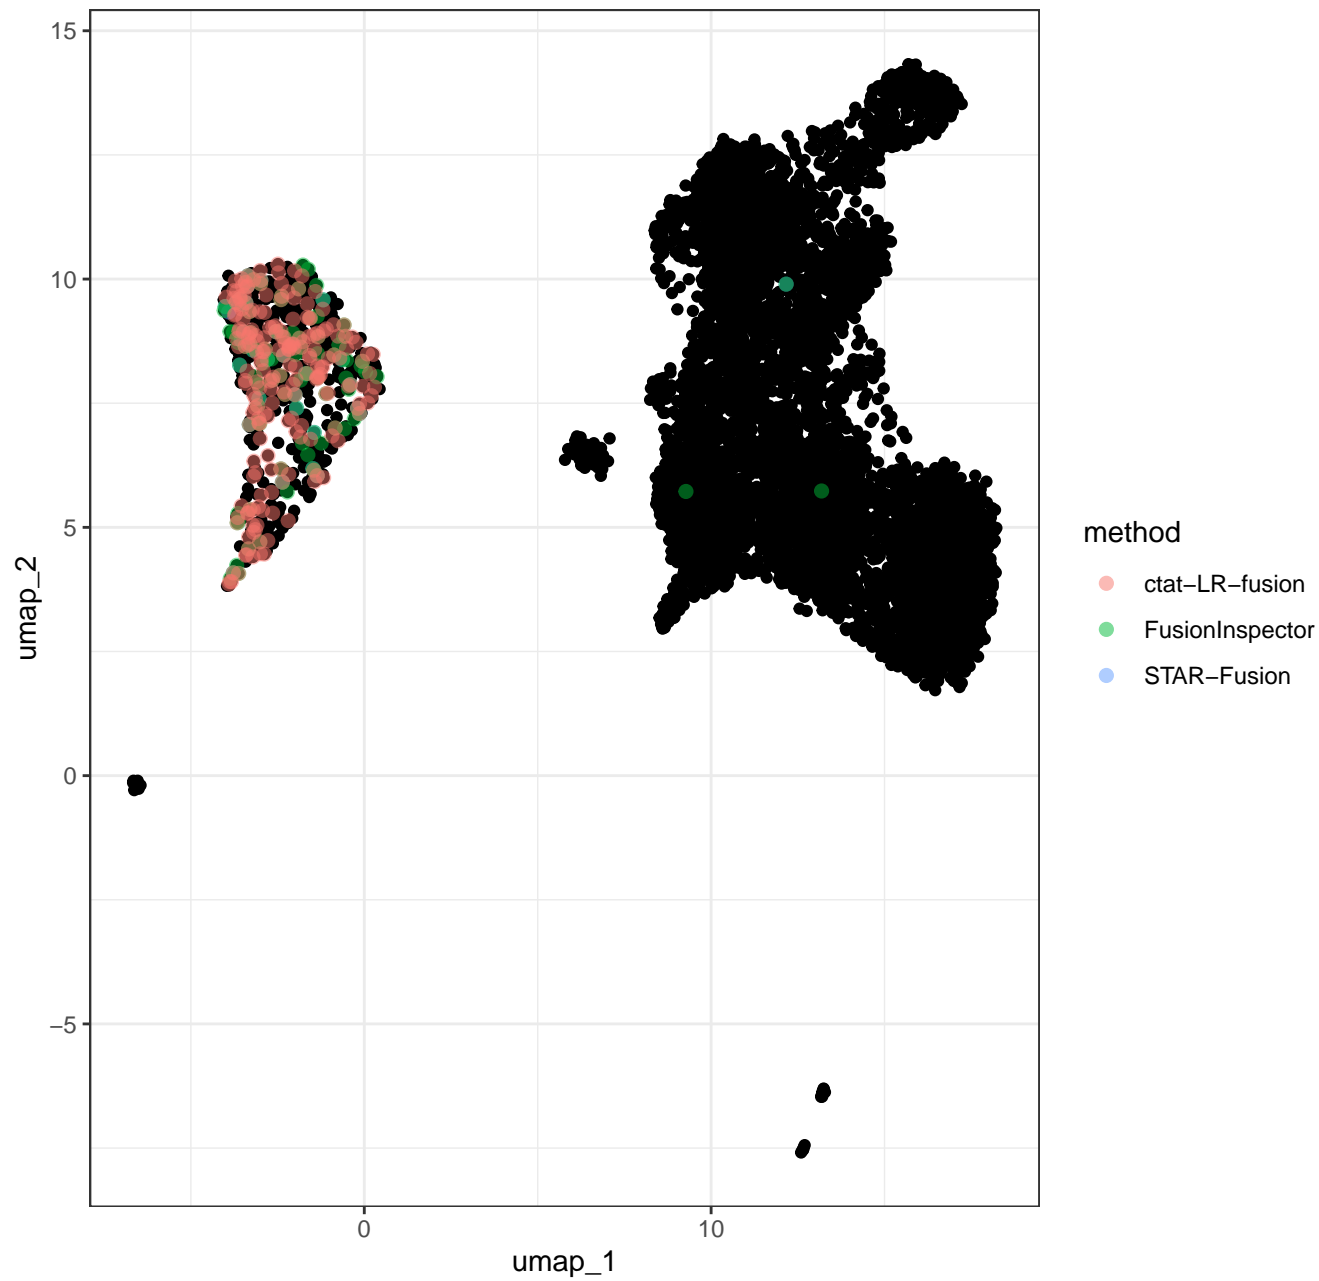

Supplement: Supplemental_File_2.zip [file M132TS.fusions_of_interest.pdf › CTAT-LRF-Paper/4.SingleCellFusions/4a.sc_Melanoma/M132TS.fusions_of_interest.pdf]

Patient 3 Tumor, Fusion: CBLC--CTC-232P5.1

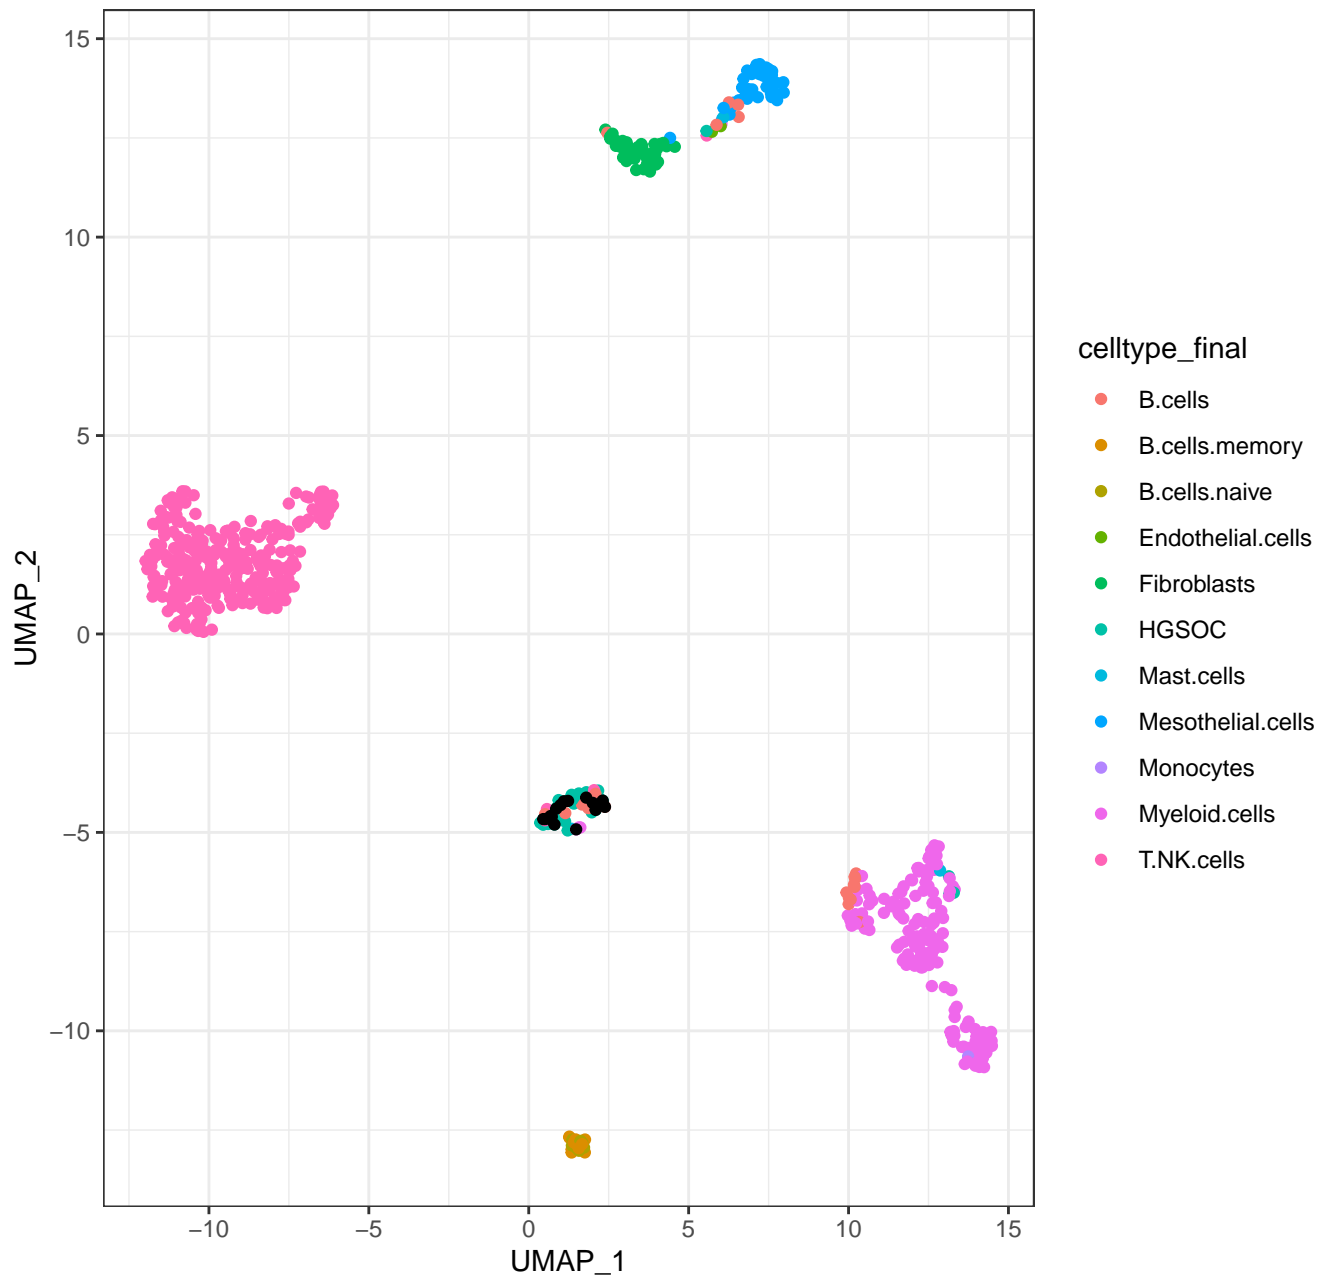

Patient 3 Tumor, Fusion: SNRNP70--ZIK1

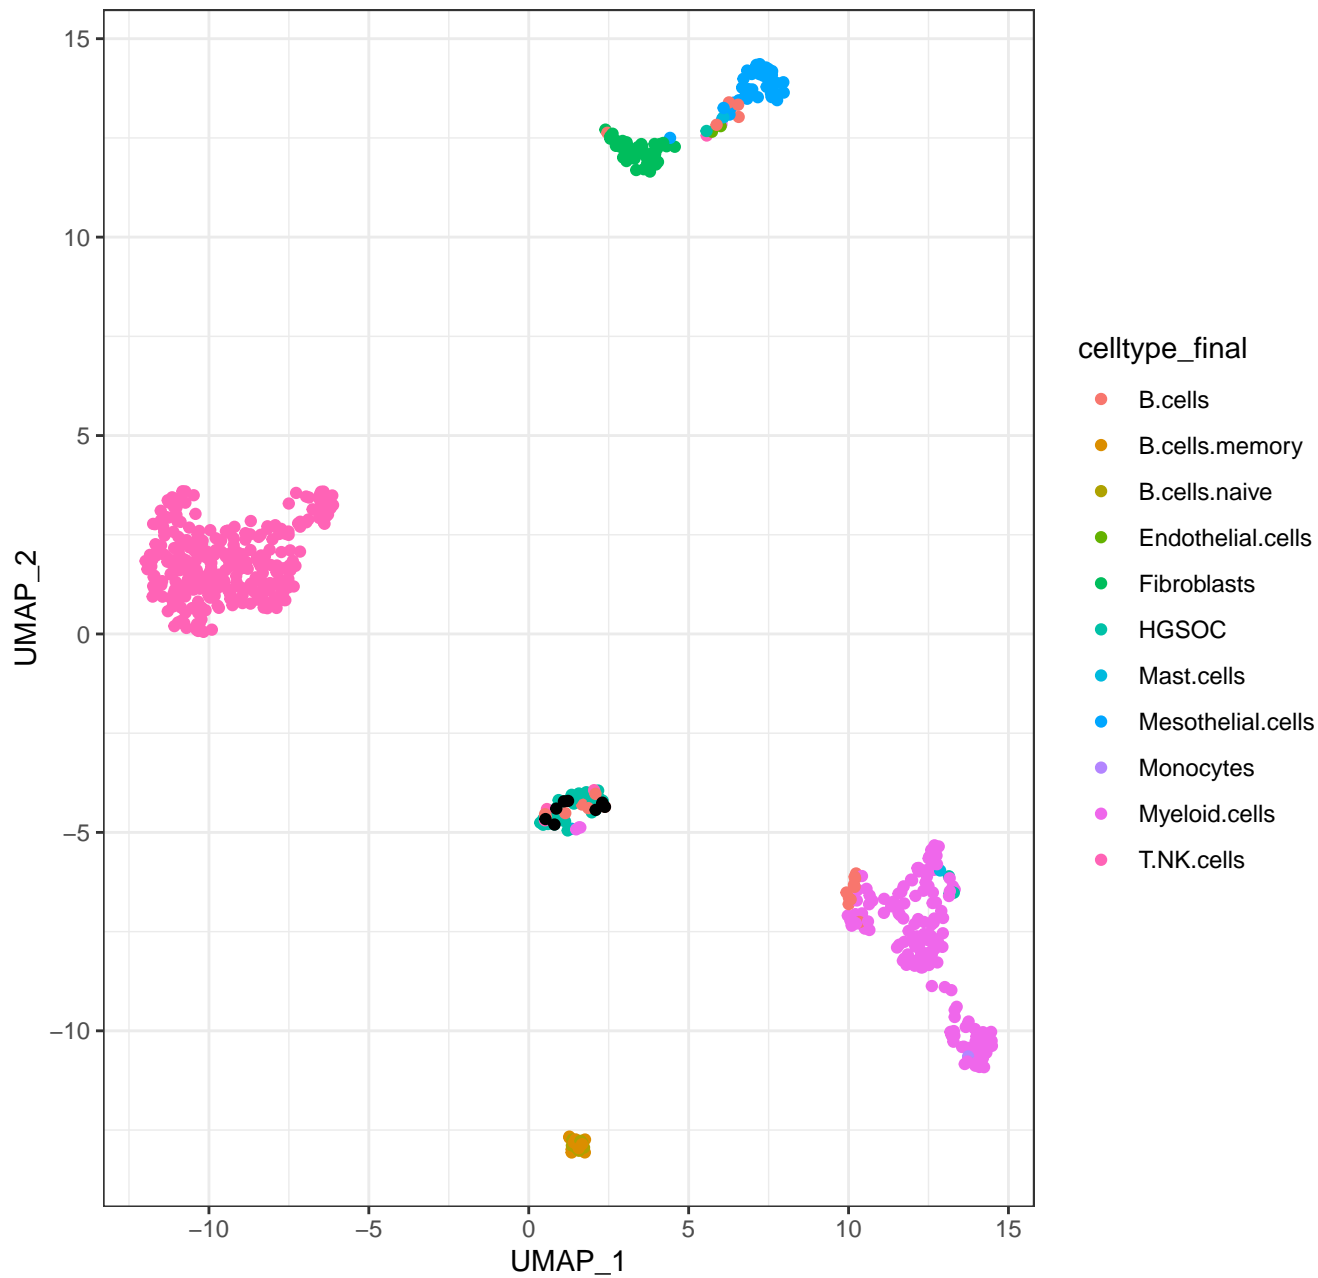

Supplement: Supplemental_File_2.zip [file Patient3_Tum.fusions_of_interest.pdf › CTAT-LRF-Paper/4.SingleCellFusions/4b.sc_HGSOC/Patient3_Tum.fusions_of_interest.pdf]
